# Supplementary material
Source: Research Square preprint supplement (doi:10.21203/rs.3.rs-9651090/v1)
Supplement: Supplementary file 1 [file 09d6cc9cbe809b6d98f01753.xlsx]

## Sheet: Sheet1
Supplementary Table 10. Molecular docking affinities between candidate compounds and prognostic gene-encoded proteins
Protein	uniprot ID	Docking compond	Compound	Affinity(kcal/mol)
ALDH6A1	Q02252	CID_3038498	Fospropofol	-6.6
ALDH6A1	Q02252	CID_1123	Taurine	-3.8
ALDH6A1	Q02252	CID_24478	Thiosulfuric acid	-3.1
ALDH6A1	Q02252	CID_60855	Zanamivir	-6.4
AMH	Q16671	CID_3038498	Fospropofol	-6.5
ASIC3	Q9UHC3	CID_3038498	Fospropofol	-6.9
ASIC3	Q9UHC3	CID_1123	Taurine	-4.5
ASIC3	Q9UHC3	CID_24478	Thiosulfuric acid	-4.4
PLK1	P53350	CID_1123	Taurine	-3.7
PLK1	P53350	CID_24478	Thiosulfuric acid	-3.5
PLK1	P53350	CID_60855	Zanamivir	-7
