# Supplementary material
Source: Research Square preprint supplement (doi:10.21203/rs.3.rs-9651090/v1)
Supplement: Supplementary file 2 [file 3b4418bd7d8a5f49ee1bcc9a.xlsx]

## Sheet: univ_cox_ph
Supplementary Table 7. Proportional hazards assumption tests for prognosis-associated candidate genes
	chisq	df	p value
DHPS	3.81804	1	0.0507035
PLAU	3.04228	1	0.0811219
SYT1	2.59477	1	0.107217
CYP4F3	2.55351	1	0.11005
MSH5	2.40523	1	0.12093
RGS5	2.19363	1	0.138583
KLRK1	1.98737	1	0.158616
ASIC3	1.89701	1	0.168414
AMH	1.89626	1	0.168498
TUBB2B	1.85222	1	0.173526
LTA	1.68825	1	0.193832
CPT1B	1.68494	1	0.194269
BGLAP	1.22531	1	0.268321
VASH1	1.09247	1	0.295925
TYMP	1.06135	1	0.302909
GRIK3	0.865408	1	0.35223
RAD54L	0.70494	1	0.401129
CACNA2D4	0.687076	1	0.407161
C1QTNF6	0.670593	1	0.412845
IL20RB	0.665598	1	0.414591
CD80	0.630894	1	0.427028
SIRPG	0.600034	1	0.438565
IL2RA	0.590224	1	0.442333
ADAMTS10	0.502871	1	0.478241
PTPRN	0.482544	1	0.487272
VWF	0.441319	1	0.506487
TCN1	0.431594	1	0.511208
SIGLEC12	0.342364	1	0.558468
AURKB	0.328117	1	0.56677
GZMB	0.297961	1	0.585163
HDAC10	0.294147	1	0.587576
IL27	0.268904	1	0.604068
PDCD1	0.236605	1	0.626669
TRIB3	0.203896	1	0.651594
COL9A2	0.199872	1	0.654825
COL6A2	0.171683	1	0.678621
COL4A4	0.108326	1	0.742058
PLK1	0.0686383	1	0.79333
VIM	0.06326	1	0.801416
PLIN2	0.0629965	1	0.801821
ABCB4	0.0606968	1	0.805398
CD72	0.0583853	1	0.809066
PCLAF	0.0552304	1	0.8142
CCNA2	0.0475805	1	0.827328
HSD3B7	0.0181817	1	0.892739
P2RX5	0.00718497	1	0.932449
UNC13D	0.00660795	1	0.935212
SLC2A3	0.00313554	1	0.955345
ALDH6A1	0.000629549	1	0.979983
MAP4K1	0.000403167	1	0.98398
