# Supplementary material
Source: Research Square preprint supplement (doi:10.21203/rs.3.rs-9651090/v1)
Supplement: Supplementary file 3 [file 58f77a9502c5b3e9b967929f.xlsx]

## Sheet: MR-IVW
Supplementary Table 3. Mendelian randomization estimates for causal associations between candidate druggable genes and KIRC
outcome	exposure	SYMBOL	method	nsnp	b	se	p value	OR	low_95%CI	up_95%CI
KIRC	eqtl-a-ENSG00000100429	HDAC10	Inverse variance weighted (fixed effects)	18	0.658238	0.108007	1.09865e-09	1.93139	1.5629	2.38675
KIRC	eqtl-a-ENSG00000162572	SCNN1D	Inverse variance weighted (fixed effects)	23	0.621193	0.073787	3.80554e-17	1.86115	1.61054	2.15075
KIRC	eqtl-a-ENSG00000085999	RAD54L	Inverse variance weighted (fixed effects)	17	0.582258	0.128012	5.40347e-06	1.79008	1.39285	2.30058
KIRC	eqtl-a-ENSG00000049089	COL9A2	Inverse variance weighted (fixed effects)	4	0.558553	0.188294	0.00301327	1.74814	1.20864	2.52846
KIRC	eqtl-a-ENSG00000104332	SFRP1	Inverse variance weighted (fixed effects)	16	0.550506	0.153962	0.000349421	1.73413	1.28241	2.34496
KIRC	eqtl-a-ENSG00000226979	LTA	Inverse variance weighted (multiplicative random effects)	103	0.508121	0.0491127	4.36226e-25	1.66217	1.50962	1.83012
KIRC	eqtl-a-ENSG00000154764	WNT7A	Inverse variance weighted (multiplicative random effects)	20	0.485412	0.108462	7.62709e-06	1.62484	1.31367	2.00972
KIRC	eqtl-a-ENSG00000189430	NCR1	Inverse variance weighted (fixed effects)	10	0.482967	0.143988	0.000795907	1.62088	1.22232	2.14939
KIRC	eqtl-a-ENSG00000213199	ASIC3	Inverse variance weighted (fixed effects)	10	0.474521	0.118721	6.41669e-05	1.60724	1.27357	2.02833
KIRC	eqtl-a-ENSG00000148204	CRB2	Inverse variance weighted (fixed effects)	12	0.456662	0.109704	3.14545e-05	1.5788	1.27334	1.95753
KIRC	eqtl-a-ENSG00000083454	P2RX5	Inverse variance weighted (fixed effects)	7	0.435102	0.165557	0.00858598	1.54512	1.11696	2.13741
KIRC	eqtl-a-ENSG00000172824	CES4A	Inverse variance weighted (fixed effects)	30	0.42839	0.0775854	3.36066e-08	1.53478	1.31827	1.78686
KIRC	eqtl-a-ENSG00000134460	IL2RA	Inverse variance weighted (fixed effects)	26	0.421178	0.0817272	2.55714e-07	1.52376	1.29822	1.78848
KIRC	eqtl-a-ENSG00000106236	NPTX2	Inverse variance weighted (fixed effects)	12	0.401631	0.139148	0.00389731	1.49426	1.13758	1.96278
KIRC	eqtl-a-ENSG00000188389	PDCD1	Inverse variance weighted (fixed effects)	48	0.380812	0.0461521	1.56746e-16	1.46347	1.3369	1.60203
KIRC	eqtl-a-ENSG00000213809	KLRK1	Inverse variance weighted (fixed effects)	20	0.367967	0.0473723	8.00132e-15	1.44479	1.31668	1.58537
KIRC	eqtl-a-ENSG00000163873	GRIK3	Inverse variance weighted (fixed effects)	15	0.364967	0.103681	0.000431408	1.44047	1.17557	1.76505
KIRC	eqtl-a-ENSG00000178999	AURKB	Inverse variance weighted (fixed effects)	16	0.359308	0.0564655	1.9745e-10	1.43234	1.28227	1.59996
KIRC	eqtl-a-ENSG00000186827	TNFRSF4	Inverse variance weighted (multiplicative random effects)	44	0.358767	0.0693061	2.2601e-07	1.43156	1.24973	1.63985
KIRC	eqtl-a-ENSG00000117560	FASLG	Inverse variance weighted (fixed effects)	21	0.345618	0.0595252	6.38884e-09	1.41286	1.25728	1.5877
KIRC	eqtl-a-ENSG00000121594	CD80	Inverse variance weighted (fixed effects)	14	0.342752	0.15258	0.0246795	1.40882	1.04466	1.89991
KIRC	eqtl-a-ENSG00000163406	SLC15A2	Inverse variance weighted (fixed effects)	61	0.294222	0.0254312	5.89369e-31	1.34208	1.27683	1.41067
KIRC	eqtl-a-ENSG00000196188	CTSE	Inverse variance weighted (fixed effects)	18	0.283538	0.099843	0.0045137	1.32782	1.09182	1.61483
KIRC	eqtl-a-ENSG00000106588	PSMA2	Inverse variance weighted (fixed effects)	59	0.282337	0.0393501	7.23042e-13	1.32623	1.22778	1.43256
KIRC	eqtl-a-ENSG00000186891	TNFRSF18	Inverse variance weighted (fixed effects)	30	0.273192	0.036978	1.49098e-13	1.31415	1.22228	1.41293
KIRC	eqtl-a-ENSG00000112715	VEGFA	Inverse variance weighted (multiplicative random effects)	47	0.267604	0.0747284	0.000342257	1.30683	1.12878	1.51297
KIRC	eqtl-a-ENSG00000122861	PLAU	Inverse variance weighted (fixed effects)	91	0.266602	0.0209273	3.56793e-37	1.30552	1.25306	1.36018
KIRC	eqtl-a-ENSG00000174564	IL20RB	Inverse variance weighted (fixed effects)	49	0.249977	0.081551	0.00217463	1.284	1.09432	1.50654
KIRC	eqtl-a-ENSG00000101336	HCK	Inverse variance weighted (multiplicative random effects)	105	0.247737	0.0502162	8.0809e-07	1.28112	1.16104	1.41363
KIRC	eqtl-a-ENSG00000067715	SYT1	Inverse variance weighted (fixed effects)	41	0.244757	0.0598099	4.27206e-05	1.27731	1.13602	1.43618
KIRC	eqtl-a-ENSG00000126861	OMG	Inverse variance weighted (fixed effects)	28	0.241067	0.0775916	0.0018908	1.27261	1.09307	1.48164
KIRC	eqtl-a-ENSG00000137825	ITPKA	Inverse variance weighted (fixed effects)	53	0.2407	0.0566297	2.13369e-05	1.27214	1.13849	1.42147
KIRC	eqtl-a-ENSG00000114854	TNNC1	Inverse variance weighted (fixed effects)	43	0.235286	0.0501998	2.77239e-06	1.26527	1.14671	1.39609
KIRC	eqtl-a-ENSG00000198515	CNGA1	Inverse variance weighted (fixed effects)	54	0.232878	0.0336923	4.78235e-12	1.26223	1.18157	1.34839
KIRC	eqtl-a-ENSG00000081052	COL4A4	Inverse variance weighted (fixed effects)	19	0.231804	0.0600176	0.000112336	1.26087	1.12094	1.41827
KIRC	eqtl-a-ENSG00000170190	SLC16A5	Inverse variance weighted (fixed effects)	56	0.231473	0.0510308	5.73453e-06	1.26046	1.14048	1.39305
KIRC	eqtl-a-ENSG00000145649	GZMA	Inverse variance weighted (multiplicative random effects)	94	0.230805	0.0615414	0.000176551	1.25961	1.11648	1.42109
KIRC	eqtl-a-ENSG00000187037	GPR141	Inverse variance weighted (fixed effects)	51	0.224823	0.0276599	4.35994e-16	1.2521	1.18603	1.32186
KIRC	eqtl-a-ENSG00000050438	SLC4A8	Inverse variance weighted (fixed effects)	27	0.221207	0.0661708	0.000828863	1.24758	1.09583	1.42035
KIRC	eqtl-a-ENSG00000166851	PLK1	Inverse variance weighted (fixed effects)	29	0.22041	0.0425476	2.21521e-07	1.24659	1.14685	1.355
KIRC	eqtl-a-ENSG00000158473	CD1D	Inverse variance weighted (fixed effects)	53	0.218879	0.0580771	0.000164052	1.24468	1.11076	1.39474
KIRC	eqtl-a-ENSG00000104814	MAP4K1	Inverse variance weighted (fixed effects)	24	0.208123	0.0804516	0.00968338	1.23136	1.05173	1.44168
KIRC	eqtl-a-ENSG00000005844	ITGAL	Inverse variance weighted (fixed effects)	86	0.200437	0.0403789	6.90882e-07	1.22194	1.12896	1.32257
KIRC	eqtl-a-ENSG00000180644	PRF1	Inverse variance weighted (fixed effects)	36	0.197319	0.0689495	0.00421247	1.21813	1.06415	1.39439
KIRC	eqtl-a-ENSG00000054356	PTPRN	Inverse variance weighted (fixed effects)	34	0.196078	0.0467837	2.77528e-05	1.21662	1.11002	1.33346
KIRC	eqtl-a-ENSG00000113263	ITK	Inverse variance weighted (fixed effects)	71	0.187964	0.0455447	3.67478e-05	1.20679	1.10373	1.31947
KIRC	eqtl-a-ENSG00000254521	SIGLEC12	Inverse variance weighted (fixed effects)	25	0.184017	0.0397674	3.70428e-06	1.20204	1.1119	1.29948
KIRC	eqtl-a-ENSG00000204482	LST1	Inverse variance weighted (fixed effects)	186	0.181712	0.0256248	1.32895e-12	1.19927	1.14052	1.26104
KIRC	eqtl-a-ENSG00000059804	SLC2A3	Inverse variance weighted (fixed effects)	30	0.181182	0.0476366	0.000142706	1.19863	1.09179	1.31594
KIRC	eqtl-a-ENSG00000138798	EGF	Inverse variance weighted (fixed effects)	55	0.178369	0.042475	2.67645e-05	1.19527	1.09979	1.29903
KIRC	eqtl-a-ENSG00000165140	FBP1	Inverse variance weighted (fixed effects)	119	0.167377	0.0326081	2.8518e-07	1.1822	1.10901	1.26022
KIRC	eqtl-a-ENSG00000101255	TRIB3	Inverse variance weighted (fixed effects)	43	0.164945	0.0401506	3.98833e-05	1.17933	1.09008	1.27588
KIRC	eqtl-a-ENSG00000138755	CXCL9	Inverse variance weighted (fixed effects)	28	0.161433	0.062415	0.00969712	1.17519	1.03987	1.32812
KIRC	eqtl-a-ENSG00000099194	SCD	Inverse variance weighted (fixed effects)	54	0.159322	0.0511096	0.00182544	1.17271	1.06093	1.29628
KIRC	eqtl-a-ENSG00000126231	PROZ	Inverse variance weighted (fixed effects)	17	0.153797	0.0494588	0.00187334	1.16625	1.05851	1.28497
KIRC	eqtl-a-ENSG00000162383	SLC1A7	Inverse variance weighted (fixed effects)	76	0.150745	0.0239087	2.88126e-10	1.1627	1.10947	1.21848
KIRC	eqtl-a-ENSG00000197272	IL27	Inverse variance weighted (fixed effects)	30	0.149936	0.0573807	0.0089749	1.16176	1.03818	1.30005
KIRC	eqtl-a-ENSG00000165272	AQP3	Inverse variance weighted (fixed effects)	53	0.148031	0.0480462	0.00206296	1.15955	1.05534	1.27405
KIRC	eqtl-a-ENSG00000153283	CD96	Inverse variance weighted (fixed effects)	132	0.137544	0.020423	1.64201e-11	1.14745	1.10243	1.19432
KIRC	eqtl-a-ENSG00000158869	FCER1G	Inverse variance weighted (multiplicative random effects)	87	0.13563	0.0275513	8.53096e-07	1.14526	1.08505	1.2088
KIRC	eqtl-a-ENSG00000158517	NCF1	Inverse variance weighted (fixed effects)	56	0.132296	0.0239344	3.24896e-08	1.14145	1.08914	1.19627
KIRC	eqtl-a-ENSG00000196735	HLA-DQA1	Inverse variance weighted (fixed effects)	182	0.128861	0.0134263	8.1778e-22	1.13753	1.10799	1.16786
KIRC	eqtl-a-ENSG00000104899	AMH	Inverse variance weighted (fixed effects)	22	0.127449	0.0503207	0.0113177	1.13593	1.02924	1.25367
KIRC	eqtl-a-ENSG00000091513	TF	Inverse variance weighted (fixed effects)	26	0.126253	0.0529118	0.0170283	1.13457	1.0228	1.25855
KIRC	eqtl-a-ENSG00000186074	CD300LF	Inverse variance weighted (fixed effects)	54	0.12356	0.0323697	0.000134995	1.13152	1.06196	1.20563
KIRC	eqtl-a-ENSG00000133466	C1QTNF6	Inverse variance weighted (fixed effects)	16	0.118681	0.0337034	0.000429362	1.12601	1.05403	1.20291
KIRC	eqtl-a-ENSG00000100292	HMOX1	Inverse variance weighted (fixed effects)	43	0.116381	0.0439021	0.00802723	1.12342	1.0308	1.22437
KIRC	eqtl-a-ENSG00000163687	DNASE1L3	Inverse variance weighted (fixed effects)	88	0.111857	0.027273	4.10695e-05	1.11835	1.06014	1.17976
KIRC	eqtl-a-ENSG00000134827	TCN1	Inverse variance weighted (fixed effects)	104	0.110923	0.0293061	0.000153724	1.11731	1.05494	1.18337
KIRC	eqtl-a-ENSG00000131203	IDO1	Inverse variance weighted (fixed effects)	91	0.110529	0.0293313	0.000164357	1.11687	1.05447	1.18296
KIRC	eqtl-a-ENSG00000049247	UTS2	Inverse variance weighted (fixed effects)	60	0.10813	0.024456	9.80559e-06	1.11419	1.06205	1.1689
KIRC	eqtl-a-ENSG00000186529	CYP4F3	Inverse variance weighted (fixed effects)	87	0.105311	0.0253435	3.24807e-05	1.11106	1.05721	1.16764
KIRC	eqtl-a-ENSG00000077984	CST7	Inverse variance weighted (fixed effects)	142	0.105229	0.0195681	7.54875e-08	1.11097	1.06916	1.1544
KIRC	eqtl-a-ENSG00000150337	FCGR1A	Inverse variance weighted (fixed effects)	76	0.103876	0.0395398	0.00861082	1.10946	1.02673	1.19886
KIRC	eqtl-a-ENSG00000110799	VWF	Inverse variance weighted (fixed effects)	76	0.103587	0.0279632	0.000211878	1.10914	1.04999	1.17163
KIRC	eqtl-a-ENSG00000128285	MCHR1	Inverse variance weighted (fixed effects)	125	0.100593	0.0241706	3.15781e-05	1.10583	1.05466	1.15947
KIRC	eqtl-a-ENSG00000160963	COL26A1	Inverse variance weighted (fixed effects)	56	0.0995804	0.0240727	3.52404e-05	1.10471	1.0538	1.15808
KIRC	eqtl-a-ENSG00000241106	HLA-DOB	Inverse variance weighted (fixed effects)	163	0.0986134	0.0157951	4.28449e-10	1.10364	1.07	1.13834
KIRC	eqtl-a-ENSG00000179344	HLA-DQB1	Inverse variance weighted (multiplicative random effects)	201	0.0969401	0.0133756	4.24492e-13	1.10179	1.07328	1.13106
KIRC	eqtl-a-ENSG00000147872	PLIN2	Inverse variance weighted (fixed effects)	83	0.0967647	0.0168974	1.02457e-08	1.1016	1.06571	1.1387
KIRC	eqtl-a-ENSG00000163083	INHBB	Inverse variance weighted (fixed effects)	71	0.0955883	0.0241721	7.67003e-05	1.10031	1.04939	1.15369
KIRC	eqtl-a-ENSG00000162631	NTNG1	Inverse variance weighted (fixed effects)	57	0.0951146	0.0377144	0.01167	1.09978	1.02142	1.18416
KIRC	eqtl-a-ENSG00000172215	CXCR6	Inverse variance weighted (multiplicative random effects)	127	0.0936144	0.0208531	7.14816e-06	1.09814	1.05416	1.14395
KIRC	eqtl-a-ENSG00000054967	RELT	Inverse variance weighted (fixed effects)	78	0.0883261	0.0155512	1.34934e-08	1.09234	1.05955	1.12615
KIRC	eqtl-a-ENSG00000124102	PI3	Inverse variance weighted (fixed effects)	105	0.0861386	0.0161817	1.01944e-07	1.08996	1.05593	1.12508
KIRC	eqtl-a-ENSG00000184574	LPAR5	Inverse variance weighted (fixed effects)	51	0.0835768	0.0282383	0.00307946	1.08717	1.02863	1.14904
KIRC	eqtl-a-ENSG00000143297	FCRL5	Inverse variance weighted (fixed effects)	117	0.0811764	0.014507	2.19771e-08	1.08456	1.05416	1.11584
KIRC	eqtl-a-ENSG00000066294	CD84	Inverse variance weighted (fixed effects)	38	0.078962	0.0306388	0.00996069	1.08216	1.01909	1.14914
KIRC	eqtl-a-ENSG00000101197	BIRC7	Inverse variance weighted (fixed effects)	43	0.0773368	0.031142	0.0130151	1.08041	1.01643	1.14841
KIRC	eqtl-a-ENSG00000239713	APOBEC3G	Inverse variance weighted (fixed effects)	41	0.0769918	0.0295362	0.00914209	1.08003	1.01928	1.1444
KIRC	eqtl-a-ENSG00000038945	MSR1	Inverse variance weighted (fixed effects)	80	0.0715378	0.0228426	0.00173758	1.07416	1.02713	1.12334
KIRC	eqtl-a-ENSG00000186470	BTN3A2	Inverse variance weighted (fixed effects)	256	0.0680848	0.00577481	4.39691e-32	1.07046	1.05841	1.08264
KIRC	eqtl-a-ENSG00000137757	CASP5	Inverse variance weighted (fixed effects)	183	0.0647354	0.0157968	4.16714e-05	1.06688	1.03435	1.10043
KIRC	eqtl-a-ENSG00000073737	DHRS9	Inverse variance weighted (fixed effects)	77	0.0629946	0.0236221	0.00765852	1.06502	1.01684	1.11549
KIRC	eqtl-a-ENSG00000164530	PI16	Inverse variance weighted (fixed effects)	115	0.0580174	0.0203408	0.00434082	1.05973	1.01832	1.10284
KIRC	eqtl-a-ENSG00000160856	FCRL3	Inverse variance weighted (multiplicative random effects)	132	0.0578168	0.01363	2.21656e-05	1.05952	1.03159	1.08821
KIRC	eqtl-a-ENSG00000204632	HLA-G	Inverse variance weighted (fixed effects)	309	0.0575468	0.00838959	6.91928e-12	1.05923	1.04196	1.0768
KIRC	eqtl-a-ENSG00000163735	CXCL5	Inverse variance weighted (fixed effects)	171	0.0548155	0.0127103	1.61289e-05	1.05635	1.03035	1.08299
KIRC	eqtl-a-ENSG00000163606	CD200R1	Inverse variance weighted (fixed effects)	94	0.0509203	0.0202719	0.0120095	1.05224	1.01125	1.09489
KIRC	eqtl-a-ENSG00000018280	SLC11A1	Inverse variance weighted (fixed effects)	107	0.0507572	0.0178877	0.00454608	1.05207	1.01582	1.08961
KIRC	eqtl-a-ENSG00000096996	IL12RB1	Inverse variance weighted (fixed effects)	69	0.046514	0.0201481	0.0209657	1.04761	1.00705	1.08981
KIRC	eqtl-a-ENSG00000115523	GNLY	Inverse variance weighted (fixed effects)	175	0.0458602	0.0168174	0.0063923	1.04693	1.01298	1.08201
KIRC	eqtl-a-ENSG00000134202	GSTM3	Inverse variance weighted (fixed effects)	146	0.0331932	0.0139772	0.0175577	1.03375	1.00581	1.06246
KIRC	eqtl-a-ENSG00000071246	VASH1	Inverse variance weighted (fixed effects)	89	0.0311775	0.0122547	0.0109549	1.03167	1.00718	1.05675
KIRC	eqtl-a-ENSG00000026297	RNASET2	Inverse variance weighted (fixed effects)	85	0.0249987	0.0111296	0.0246943	1.02531	1.00319	1.04793
KIRC	eqtl-a-ENSG00000172543	CTSW	Inverse variance weighted (fixed effects)	222	-0.0387515	0.0119686	0.00120468	0.96199	0.939686	0.984823
KIRC	eqtl-a-ENSG00000172322	CLEC12A	Inverse variance weighted (multiplicative random effects)	202	-0.0389136	0.011676	0.000859781	0.961834	0.940072	0.984099
KIRC	eqtl-a-ENSG00000158477	CD1A	Inverse variance weighted (fixed effects)	86	-0.0424893	0.0145049	0.00339724	0.958401	0.931537	0.986039
KIRC	eqtl-a-ENSG00000140678	ITGAX	Inverse variance weighted (fixed effects)	147	-0.0524643	0.00993803	1.29792e-07	0.948888	0.930584	0.967552
KIRC	eqtl-a-ENSG00000135218	CD36	Inverse variance weighted (fixed effects)	127	-0.0535145	0.016616	0.00127892	0.947892	0.917519	0.979271
KIRC	eqtl-a-ENSG00000136250	AOAH	Inverse variance weighted (multiplicative random effects)	162	-0.0623541	0.0142761	1.25554e-05	0.93955	0.913625	0.966211
KIRC	eqtl-a-ENSG00000072694	FCGR2B	Inverse variance weighted (fixed effects)	153	-0.0639107	0.0131713	1.22053e-06	0.938089	0.914181	0.962622
KIRC	eqtl-a-ENSG00000141526	SLC16A3	Inverse variance weighted (fixed effects)	45	-0.0644898	0.0234321	0.00591977	0.937546	0.895461	0.981608
KIRC	eqtl-a-ENSG00000157873	TNFRSF14	Inverse variance weighted (fixed effects)	34	-0.066528	0.0247011	0.00707435	0.935637	0.891418	0.982049
KIRC	eqtl-a-ENSG00000158865	SLC5A11	Inverse variance weighted (fixed effects)	42	-0.0667538	0.019138	0.000486608	0.935425	0.900987	0.97118
KIRC	eqtl-a-ENSG00000164483	SAMD3	Inverse variance weighted (fixed effects)	85	-0.0668209	0.0173176	0.000114065	0.935363	0.904147	0.967656
KIRC	eqtl-a-ENSG00000117115	PADI2	Inverse variance weighted (fixed effects)	74	-0.0695157	0.0175747	7.6396e-05	0.932845	0.901259	0.965539
KIRC	eqtl-a-ENSG00000122223	CD244	Inverse variance weighted (fixed effects)	60	-0.0719529	0.0269486	0.00758509	0.930575	0.882698	0.981048
KIRC	eqtl-a-ENSG00000064886	CHI3L2	Inverse variance weighted (fixed effects)	143	-0.0733078	0.0171049	1.82097e-05	0.929315	0.898675	0.960999
KIRC	eqtl-a-ENSG00000089012	SIRPG	Inverse variance weighted (fixed effects)	49	-0.0746679	0.0262824	0.00449745	0.928052	0.881455	0.977112
KIRC	eqtl-a-ENSG00000074803	SLC12A1	Inverse variance weighted (fixed effects)	97	-0.0852988	0.0090337	3.64727e-21	0.918238	0.902123	0.934641
KIRC	eqtl-a-ENSG00000005471	ABCB4	Inverse variance weighted (fixed effects)	84	-0.0886342	0.0357841	0.0132524	0.91518	0.853192	0.981673
KIRC	eqtl-a-ENSG00000165061	ZMAT4	Inverse variance weighted (fixed effects)	46	-0.0941425	0.0192493	1.00476e-06	0.910153	0.876454	0.945148
KIRC	eqtl-a-ENSG00000163545	NUAK2	Inverse variance weighted (fixed effects)	61	-0.0947022	0.0358477	0.00824696	0.909644	0.847924	0.975856
KIRC	eqtl-a-ENSG00000114013	CD86	Inverse variance weighted (fixed effects)	111	-0.0973118	0.0270406	0.000319772	0.907273	0.86044	0.956655
KIRC	eqtl-a-ENSG00000100453	GZMB	Inverse variance weighted (fixed effects)	63	-0.0989194	0.0281019	0.000431497	0.905816	0.857273	0.957107
KIRC	eqtl-a-ENSG00000198417	MT1F	Inverse variance weighted (fixed effects)	146	-0.101903	0.0227628	7.58032e-06	0.903118	0.86371	0.944323
KIRC	eqtl-a-ENSG00000073060	SCARB1	Inverse variance weighted (fixed effects)	32	-0.104166	0.0372553	0.00517386	0.901076	0.837623	0.969334
KIRC	eqtl-a-ENSG00000178445	GLDC	Inverse variance weighted (fixed effects)	46	-0.105235	0.0490931	0.0320666	0.900113	0.817538	0.991028
KIRC	eqtl-a-ENSG00000205560	CPT1B	Inverse variance weighted (fixed effects)	32	-0.107901	0.0402368	0.00732607	0.897717	0.829639	0.971381
KIRC	eqtl-a-ENSG00000125245	GPR18	Inverse variance weighted (fixed effects)	69	-0.109741	0.0375527	0.00347442	0.896066	0.832482	0.964508
KIRC	eqtl-a-ENSG00000142173	COL6A2	Inverse variance weighted (fixed effects)	91	-0.116317	0.0277073	2.6921e-05	0.890193	0.843139	0.939873
KIRC	eqtl-a-ENSG00000109272	PF4V1	Inverse variance weighted (multiplicative random effects)	22	-0.116679	0.0439634	0.00795414	0.88987	0.816403	0.96995
KIRC	eqtl-a-ENSG00000013725	CD6	Inverse variance weighted (fixed effects)	35	-0.119785	0.0478166	0.0122418	0.887111	0.807748	0.974272
KIRC	eqtl-a-ENSG00000237541	HLA-DQA2	Inverse variance weighted (fixed effects)	140	-0.124404	0.0154766	9.11467e-16	0.883023	0.856639	0.910219
KIRC	eqtl-a-ENSG00000237541	HLA-DQA1	Inverse variance weighted (fixed effects)	140	-0.124404	0.0154766	9.11467e-16	0.883023	0.856639	0.910219
KIRC	eqtl-a-ENSG00000073849	ST6GAL1	Inverse variance weighted (fixed effects)	41	-0.124605	0.0400071	0.00184217	0.882846	0.816263	0.95486
KIRC	eqtl-a-ENSG00000088053	GP6	Inverse variance weighted (fixed effects)	22	-0.130488	0.0538726	0.0154289	0.877667	0.789719	0.97541
KIRC	eqtl-a-ENSG00000110876	SELPLG	Inverse variance weighted (fixed effects)	57	-0.13275	0.0436675	0.00236559	0.875684	0.803853	0.953933
KIRC	eqtl-a-ENSG00000108375	RNF43	Inverse variance weighted (fixed effects)	70	-0.136497	0.0534527	0.0106612	0.872409	0.785634	0.968768
KIRC	eqtl-a-ENSG00000197696	NMB	Inverse variance weighted (fixed effects)	84	-0.140419	0.0150563	1.09659e-20	0.868994	0.843725	0.895021
KIRC	eqtl-a-ENSG00000153563	CD8A	Inverse variance weighted (fixed effects)	96	-0.140502	0.0370883	0.00015168	0.868922	0.807999	0.934439
KIRC	eqtl-a-ENSG00000169896	ITGAM	Inverse variance weighted (multiplicative random effects)	67	-0.140763	0.0542742	0.00949884	0.868695	0.781031	0.966199
KIRC	eqtl-a-ENSG00000023445	BIRC3	Inverse variance weighted (multiplicative random effects)	73	-0.146444	0.0635884	0.0212787	0.863774	0.762557	0.978425
KIRC	eqtl-a-ENSG00000099953	MMP11	Inverse variance weighted (fixed effects)	21	-0.14842	0.0587785	0.0115677	0.862069	0.768261	0.967332
KIRC	eqtl-a-ENSG00000148926	ADM	Inverse variance weighted (fixed effects)	41	-0.148587	0.0424222	0.000460779	0.861925	0.793157	0.936656
KIRC	eqtl-a-ENSG00000071909	MYO3B	Inverse variance weighted (fixed effects)	57	-0.15169	0.0417841	0.000283059	0.859255	0.791689	0.932587
KIRC	eqtl-a-ENSG00000100450	GZMH	Inverse variance weighted (fixed effects)	50	-0.152027	0.0530403	0.00415364	0.858965	0.774153	0.953069
KIRC	eqtl-a-ENSG00000143382	ADAMTSL4	Inverse variance weighted (fixed effects)	97	-0.15585	0.0249544	4.2276e-10	0.855688	0.814842	0.89858
KIRC	eqtl-a-ENSG00000179593	ALOX15B	Inverse variance weighted (fixed effects)	28	-0.158556	0.0403993	8.68297e-05	0.853375	0.788409	0.923695
KIRC	eqtl-a-ENSG00000007402	CACNA2D2	Inverse variance weighted (fixed effects)	88	-0.160916	0.049778	0.00122638	0.851364	0.772224	0.938614
KIRC	eqtl-a-ENSG00000025708	TYMP	Inverse variance weighted (multiplicative random effects)	85	-0.164181	0.0292751	2.04406e-08	0.848588	0.801267	0.898703
KIRC	eqtl-a-ENSG00000026025	VIM	Inverse variance weighted (fixed effects)	35	-0.166927	0.0544511	0.00217207	0.846261	0.760597	0.941573
KIRC	eqtl-a-ENSG00000134121	CHL1	Inverse variance weighted (fixed effects)	26	-0.169164	0.0695917	0.0150652	0.84437	0.736708	0.967767
KIRC	eqtl-a-ENSG00000198851	CD3E	Inverse variance weighted (fixed effects)	22	-0.170086	0.0616494	0.00579932	0.843593	0.747577	0.95194
KIRC	eqtl-a-ENSG00000154269	ENPP3	Inverse variance weighted (fixed effects)	27	-0.170101	0.0632446	0.00715448	0.84358	0.745232	0.954907
KIRC	eqtl-a-ENSG00000231852	CYP21A2	Inverse variance weighted (fixed effects)	148	-0.176491	0.0133074	3.81262e-40	0.838206	0.816626	0.860356
KIRC	eqtl-a-ENSG00000166803	PCLAF	Inverse variance weighted (fixed effects)	74	-0.176942	0.0279319	2.37695e-10	0.837828	0.793193	0.884975
KIRC	eqtl-a-ENSG00000034510	TMSB10	Inverse variance weighted (fixed effects)	47	-0.178838	0.0703957	0.0110704	0.836241	0.728467	0.959961
KIRC	eqtl-a-ENSG00000163599	CTLA4	Inverse variance weighted (multiplicative random effects)	52	-0.180379	0.0747173	0.0157718	0.834954	0.72121	0.966636
KIRC	eqtl-a-ENSG00000161638	ITGA5	Inverse variance weighted (fixed effects)	33	-0.18295	0.0729174	0.0121071	0.83281	0.7219	0.960759
KIRC	eqtl-a-ENSG00000134242	PTPN22	Inverse variance weighted (fixed effects)	58	-0.185141	0.026785	4.7746e-12	0.830987	0.788487	0.875778
KIRC	eqtl-a-ENSG00000050767	COL23A1	Inverse variance weighted (fixed effects)	39	-0.190848	0.0548678	0.000504542	0.826258	0.742012	0.920068
KIRC	eqtl-a-ENSG00000117322	CR2	Inverse variance weighted (fixed effects)	34	-0.200998	0.0870052	0.0208778	0.817914	0.689679	0.969991
KIRC	eqtl-a-ENSG00000104894	CD37	Inverse variance weighted (fixed effects)	41	-0.202325	0.0254995	2.1137e-15	0.816829	0.777008	0.858691
KIRC	eqtl-a-ENSG00000175206	NPPA	Inverse variance weighted (fixed effects)	20	-0.203217	0.0692357	0.00333393	0.816101	0.71254	0.934714
KIRC	eqtl-a-ENSG00000099377	HSD3B7	Inverse variance weighted (fixed effects)	86	-0.207851	0.0272987	2.65814e-14	0.812328	0.770007	0.856976
KIRC	eqtl-a-ENSG00000144847	IGSF11	Inverse variance weighted (fixed effects)	42	-0.21223	0.0426346	6.42829e-07	0.808779	0.743941	0.879267
KIRC	eqtl-a-ENSG00000204262	COL5A2	Inverse variance weighted (fixed effects)	76	-0.213572	0.0495858	1.654e-05	0.807694	0.73289	0.890134
KIRC	eqtl-a-ENSG00000143248	RGS5	Inverse variance weighted (fixed effects)	20	-0.216363	0.0381689	1.43991e-08	0.805443	0.747385	0.86801
KIRC	eqtl-a-ENSG00000049249	TNFRSF9	Inverse variance weighted (fixed effects)	55	-0.225197	0.0438654	2.83916e-07	0.798359	0.732587	0.870036
KIRC	eqtl-a-ENSG00000165409	TSHR	Inverse variance weighted (fixed effects)	46	-0.237285	0.0561891	2.41102e-05	0.788766	0.706511	0.880598
KIRC	eqtl-a-ENSG00000177807	KCNJ10	Inverse variance weighted (fixed effects)	13	-0.246064	0.0731083	0.000763354	0.781872	0.677493	0.902333
KIRC	eqtl-a-ENSG00000119711	ALDH6A1	Inverse variance weighted (fixed effects)	27	-0.247272	0.0977827	0.0114457	0.780928	0.644729	0.945901
KIRC	eqtl-a-ENSG00000110448	CD5	Inverse variance weighted (fixed effects)	7	-0.255852	0.0837464	0.00224999	0.774256	0.65705	0.91237
KIRC	eqtl-a-ENSG00000179869	ABCA13	Inverse variance weighted (multiplicative random effects)	47	-0.26148	0.106216	0.0138251	0.769911	0.625212	0.948099
KIRC	eqtl-a-ENSG00000092929	UNC13D	Inverse variance weighted (fixed effects)	31	-0.275072	0.0418289	4.82816e-11	0.759517	0.699733	0.82441
KIRC	eqtl-a-ENSG00000196177	ACADSB	Inverse variance weighted (fixed effects)	21	-0.275728	0.111619	0.0135019	0.759019	0.609874	0.944638
KIRC	eqtl-a-ENSG00000213918	DNASE1	Inverse variance weighted (fixed effects)	25	-0.278639	0.0544137	3.04334e-07	0.756813	0.680254	0.841989
KIRC	eqtl-a-ENSG00000144152	FBLN7	Inverse variance weighted (fixed effects)	109	-0.283848	0.0489336	6.60462e-09	0.752881	0.684027	0.828666
KIRC	eqtl-a-ENSG00000197822	OCLN	Inverse variance weighted (fixed effects)	34	-0.292657	0.0526164	2.66568e-08	0.746278	0.673151	0.827349
KIRC	eqtl-a-ENSG00000204410	MSH5	Inverse variance weighted (multiplicative random effects)	63	-0.298933	0.0727172	3.94115e-05	0.741609	0.643098	0.855211
KIRC	eqtl-a-ENSG00000244482	LILRA6	Inverse variance weighted (fixed effects)	19	-0.324994	0.0719189	6.21626e-06	0.722532	0.627535	0.831908
KIRC	eqtl-a-ENSG00000187730	GABRD	Inverse variance weighted (fixed effects)	21	-0.325334	0.0982403	0.000927591	0.722286	0.595779	0.875655
KIRC	eqtl-a-ENSG00000088002	SULT2B1	Inverse variance weighted (fixed effects)	9	-0.328133	0.105822	0.00192998	0.720267	0.585351	0.886281
KIRC	eqtl-a-ENSG00000151062	CACNA2D4	Inverse variance weighted (fixed effects)	13	-0.332184	0.11002	0.00253364	0.717356	0.578207	0.889991
KIRC	eqtl-a-ENSG00000137101	CD72	Inverse variance weighted (fixed effects)	24	-0.347547	0.0915556	0.000147038	0.706419	0.590376	0.845271
KIRC	eqtl-a-ENSG00000171208	NETO2	Inverse variance weighted (fixed effects)	25	-0.382828	0.102961	0.000200669	0.68193	0.557311	0.834416
KIRC	eqtl-a-ENSG00000111537	IFNG	Inverse variance weighted (fixed effects)	25	-0.38757	0.0760637	3.48127e-07	0.678704	0.584701	0.787821
KIRC	eqtl-a-ENSG00000095059	DHPS	Inverse variance weighted (fixed effects)	20	-0.396171	0.101747	9.87396e-05	0.672892	0.551234	0.8214
KIRC	eqtl-a-ENSG00000142303	ADAMTS10	Inverse variance weighted (fixed effects)	10	-0.403475	0.119224	0.000713923	0.667995	0.528795	0.843837
KIRC	eqtl-a-ENSG00000197540	GZMM	Inverse variance weighted (fixed effects)	13	-0.405027	0.0984894	3.91576e-05	0.666959	0.549874	0.808974
KIRC	eqtl-a-ENSG00000137285	TUBB2B	Inverse variance weighted (fixed effects)	13	-0.426623	0.0847661	4.83e-07	0.652709	0.552797	0.77068
KIRC	eqtl-a-ENSG00000145386	CCNA2	Inverse variance weighted (fixed effects)	16	-0.448212	0.086087	1.92442e-07	0.638769	0.539592	0.756176
KIRC	eqtl-a-ENSG00000179934	CCR8	Inverse variance weighted (fixed effects)	22	-0.449278	0.106102	2.2916e-05	0.638088	0.518281	0.785591
KIRC	eqtl-a-ENSG00000138028	CGREF1	Inverse variance weighted (fixed effects)	28	-0.467229	0.087187	8.3715e-08	0.626736	0.528287	0.743533
KIRC	eqtl-a-ENSG00000197471	SPN	Inverse variance weighted (fixed effects)	10	-0.49255	0.125745	8.96413e-05	0.611066	0.477586	0.781852
KIRC	eqtl-a-ENSG00000163898	LIPH	Inverse variance weighted (fixed effects)	24	-0.510038	0.10983	3.41894e-06	0.600473	0.484177	0.744702
KIRC	eqtl-a-ENSG00000135245	HILPDA	Inverse variance weighted (fixed effects)	23	-0.528198	0.100648	1.53797e-07	0.589666	0.484097	0.718257
KIRC	eqtl-a-ENSG00000204305	AGER	Inverse variance weighted (fixed effects)	137	-0.539317	0.034287	9.49728e-56	0.583147	0.545246	0.623682
KIRC	eqtl-a-ENSG00000131771	PPP1R1B	Inverse variance weighted (multiplicative random effects)	47	-0.548297	0.0792282	4.50119e-12	0.577933	0.494809	0.675022
KIRC	eqtl-a-ENSG00000159423	ALDH4A1	Inverse variance weighted (multiplicative random effects)	20	-0.558301	0.187128	0.00284952	0.57218	0.396503	0.825695
KIRC	eqtl-a-ENSG00000149575	SCN2B	Inverse variance weighted (fixed effects)	29	-0.586594	0.0858875	8.50363e-12	0.556218	0.470042	0.658195
KIRC	eqtl-a-ENSG00000166278	C2	Inverse variance weighted (multiplicative random effects)	102	-0.651743	0.0774247	3.83715e-17	0.521137	0.447761	0.606536
KIRC	eqtl-a-ENSG00000091879	ANGPT2	Inverse variance weighted (fixed effects)	16	-0.665431	0.142037	2.80078e-06	0.514052	0.389137	0.679065
KIRC	eqtl-a-ENSG00000169860	P2RY1	Inverse variance weighted (fixed effects)	5	-0.66893	0.242458	0.00579862	0.512256	0.318495	0.823894
KIRC	eqtl-a-ENSG00000126500	FLRT1	Inverse variance weighted (fixed effects)	9	-0.7173	0.187702	0.000132648	0.488068	0.337836	0.705108
KIRC	eqtl-a-ENSG00000168209	DDIT4	Inverse variance weighted (fixed effects)	60	-0.750976	0.055458	8.91519e-42	0.471906	0.4233	0.526093
KIRC	eqtl-a-ENSG00000242252	BGLAP	Inverse variance weighted (fixed effects)	9	-0.828751	0.148027	2.16016e-08	0.436594	0.326644	0.583554
KIRC	eqtl-a-ENSG00000250506	CDK3	Inverse variance weighted (fixed effects)	10	-0.875873	0.179072	1.00235e-06	0.416498	0.293213	0.591619
