# Supplementary material
Source: Research Square preprint supplement (doi:10.21203/rs.3.rs-9651090/v1)
Supplement: Supplementary file 4 [file 641540015e8ffc6a19e6431c.xlsx]

## Sheet: Steiger
Supplementary Table 5. Steiger directionality tests for candidate druggable genes associated with KIRC
outcome	exposure	SYMBOL	snp_r2.exposure	snp_r2.outcome	correct_causal_direction	steiger_p value
KIRC	eqtl-a-ENSG00000005471	ABCB4	0.252666	0.000156333	TRUE	<0.0001
KIRC	eqtl-a-ENSG00000007402	CACNA2D2	0.158767	0.000294803	TRUE	<0.0001
KIRC	eqtl-a-ENSG00000025708	TYMP	0.86813	0.000463849	TRUE	<0.0001
KIRC	eqtl-a-ENSG00000026025	VIM	0.243231	7.76287e-05	TRUE	<0.0001
KIRC	eqtl-a-ENSG00000038945	MSR1	0.605555	0.000230431	TRUE	<0.0001
KIRC	eqtl-a-ENSG00000049249	TNFRSF9	0.217967	0.000136258	TRUE	<0.0001
KIRC	eqtl-a-ENSG00000050438	SLC4A8	0.0805192	7.4134e-05	TRUE	<0.0001
KIRC	eqtl-a-ENSG00000054356	PTPRN	0.257608	0.000106454	TRUE	<0.0001
KIRC	eqtl-a-ENSG00000059804	SLC2A3	0.162361	7.88364e-05	TRUE	<0.0001
KIRC	eqtl-a-ENSG00000066294	CD84	0.356727	8.40932e-05	TRUE	<0.0001
KIRC	eqtl-a-ENSG00000067715	SYT1	0.0921914	8.43967e-05	TRUE	<0.0001
KIRC	eqtl-a-ENSG00000071246	VASH1	0.915746	0.000219225	TRUE	<0.0001
KIRC	eqtl-a-ENSG00000071909	MYO3B	0.204704	0.000199581	TRUE	<0.0001
KIRC	eqtl-a-ENSG00000073060	SCARB1	0.25458	0.000125353	TRUE	<0.0001
KIRC	eqtl-a-ENSG00000073737	DHRS9	0.454044	0.000257768	TRUE	<0.0001
KIRC	eqtl-a-ENSG00000073849	ST6GAL1	0.447399	0.00012714	TRUE	<0.0001
KIRC	eqtl-a-ENSG00000077984	CST7	0.895458	0.000436511	TRUE	<0.0001
KIRC	eqtl-a-ENSG00000081052	COL4A4	0.0852543	5.02824e-05	TRUE	<0.0001
KIRC	eqtl-a-ENSG00000088053	GP6	0.280166	5.21526e-05	TRUE	<0.0001
KIRC	eqtl-a-ENSG00000089012	SIRPG	0.385295	9.15268e-05	TRUE	<0.0001
KIRC	eqtl-a-ENSG00000091513	TF	0.0878504	4.78647e-05	TRUE	<0.0001
KIRC	eqtl-a-ENSG00000092929	UNC13D	0.215437	0.000179194	TRUE	<0.0001
KIRC	eqtl-a-ENSG00000095059	DHPS	0.0999207	8.49187e-05	TRUE	<0.0001
KIRC	eqtl-a-ENSG00000096996	IL12RB1	0.601688	0.000103124	TRUE	<0.0001
KIRC	eqtl-a-ENSG00000099377	HSD3B7	0.421106	0.000352691	TRUE	<0.0001
KIRC	eqtl-a-ENSG00000099953	MMP11	0.0781994	5.00732e-05	TRUE	<0.0001
KIRC	eqtl-a-ENSG00000100292	HMOX1	0.158574	0.000143732	TRUE	<0.0001
KIRC	eqtl-a-ENSG00000100453	GZMB	0.537811	0.000167706	TRUE	<0.0001
KIRC	eqtl-a-ENSG00000101197	BIRC7	0.463895	0.000155039	TRUE	<0.0001
KIRC	eqtl-a-ENSG00000101255	TRIB3	0.255853	0.000146665	TRUE	<0.0001
KIRC	eqtl-a-ENSG00000104332	SFRP1	0.0797524	4.8572e-05	TRUE	<0.0001
KIRC	eqtl-a-ENSG00000104894	CD37	0.443516	0.00026805	TRUE	<0.0001
KIRC	eqtl-a-ENSG00000104899	AMH	0.166202	3.50021e-05	TRUE	<0.0001
KIRC	eqtl-a-ENSG00000106588	PSMA2	0.399352	0.000334301	TRUE	<0.0001
KIRC	eqtl-a-ENSG00000110799	VWF	0.469881	0.000237757	TRUE	<0.0001
KIRC	eqtl-a-ENSG00000110876	SELPLG	0.400718	9.50806e-05	TRUE	<0.0001
KIRC	eqtl-a-ENSG00000112715	VEGFA	0.134096	0.000331272	TRUE	<0.0001
KIRC	eqtl-a-ENSG00000113263	ITK	0.1599	0.000141003	TRUE	<0.0001
KIRC	eqtl-a-ENSG00000114013	CD86	0.416418	0.000322807	TRUE	<0.0001
KIRC	eqtl-a-ENSG00000114854	TNNC1	0.149246	0.000106598	TRUE	<0.0001
KIRC	eqtl-a-ENSG00000115523	GNLY	0.959344	0.000465535	TRUE	<0.0001
KIRC	eqtl-a-ENSG00000119711	ALDH6A1	0.115195	3.73425e-05	TRUE	<0.0001
KIRC	eqtl-a-ENSG00000122223	CD244	0.52551	0.000164835	TRUE	<0.0001
KIRC	eqtl-a-ENSG00000122861	PLAU	0.564284	0.000674225	TRUE	<0.0001
KIRC	eqtl-a-ENSG00000125245	GPR18	0.260975	6.14554e-05	TRUE	<0.0001
KIRC	eqtl-a-ENSG00000126861	OMG	0.061476	3.72244e-05	TRUE	<0.0001
KIRC	eqtl-a-ENSG00000128285	MCHR1	0.591429	0.000187733	TRUE	<0.0001
KIRC	eqtl-a-ENSG00000131203	IDO1	0.462995	0.000275094	TRUE	<0.0001
KIRC	eqtl-a-ENSG00000133466	C1QTNF6	0.185434	4.44321e-05	TRUE	<0.0001
KIRC	eqtl-a-ENSG00000134121	CHL1	0.0640987	4.74634e-05	TRUE	<0.0001
KIRC	eqtl-a-ENSG00000134460	IL2RA	0.0970552	0.000147426	TRUE	<0.0001
KIRC	eqtl-a-ENSG00000134827	TCN1	0.664981	0.000281249	TRUE	<0.0001
KIRC	eqtl-a-ENSG00000138755	CXCL9	0.0850674	3.43251e-05	TRUE	<0.0001
KIRC	eqtl-a-ENSG00000138798	EGF	0.176904	0.000167371	TRUE	<0.0001
KIRC	eqtl-a-ENSG00000142173	COL6A2	0.482573	0.000258029	TRUE	<0.0001
KIRC	eqtl-a-ENSG00000143248	RGS5	0.183307	9.5976e-05	TRUE	<0.0001
KIRC	eqtl-a-ENSG00000144847	IGSF11	0.219122	0.000115966	TRUE	<0.0001
KIRC	eqtl-a-ENSG00000147872	PLIN2	0.863972	0.000247522	TRUE	<0.0001
KIRC	eqtl-a-ENSG00000149575	SCN2B	0.204187	0.000161837	TRUE	<0.0001
KIRC	eqtl-a-ENSG00000153283	CD96	0.913549	0.000361617	TRUE	<0.0001
KIRC	eqtl-a-ENSG00000154269	ENPP3	0.109905	9.18531e-05	TRUE	<0.0001
KIRC	eqtl-a-ENSG00000158477	CD1A	0.972476	0.000166503	TRUE	<0.0001
KIRC	eqtl-a-ENSG00000158865	SLC5A11	0.670714	0.00012464	TRUE	<0.0001
KIRC	eqtl-a-ENSG00000160963	COL26A1	0.618116	0.000180968	TRUE	<0.0001
KIRC	eqtl-a-ENSG00000161638	ITGA5	0.0715535	7.106e-05	TRUE	<0.0001
KIRC	eqtl-a-ENSG00000162383	SLC1A7	0.697138	0.000239971	TRUE	<0.0001
KIRC	eqtl-a-ENSG00000162631	NTNG1	0.25386	8.84305e-05	TRUE	<0.0001
KIRC	eqtl-a-ENSG00000163083	INHBB	0.50063	0.000208172	TRUE	<0.0001
KIRC	eqtl-a-ENSG00000163406	SLC15A2	0.510059	0.000394019	TRUE	<0.0001
KIRC	eqtl-a-ENSG00000163687	DNASE1L3	0.907073	0.000141037	TRUE	<0.0001
KIRC	eqtl-a-ENSG00000164530	PI16	0.769964	0.000384828	TRUE	<0.0001
KIRC	eqtl-a-ENSG00000165061	ZMAT4	0.562201	0.000198627	TRUE	<0.0001
KIRC	eqtl-a-ENSG00000165409	TSHR	0.11327	8.64644e-05	TRUE	<0.0001
KIRC	eqtl-a-ENSG00000166803	PCLAF	0.376986	0.000138066	TRUE	<0.0001
KIRC	eqtl-a-ENSG00000166851	PLK1	0.158661	9.37778e-05	TRUE	<0.0001
KIRC	eqtl-a-ENSG00000170190	SLC16A5	0.137891	0.000240477	TRUE	<0.0001
KIRC	eqtl-a-ENSG00000172824	CES4A	0.0783638	9.2911e-05	TRUE	<0.0001
KIRC	eqtl-a-ENSG00000174564	IL20RB	0.0521838	7.40048e-05	TRUE	<0.0001
KIRC	eqtl-a-ENSG00000175206	NPPA	0.114415	4.80309e-05	TRUE	<0.0001
KIRC	eqtl-a-ENSG00000177807	KCNJ10	0.0578185	7.79369e-05	TRUE	<0.0001
KIRC	eqtl-a-ENSG00000178445	GLDC	0.145335	8.95347e-05	TRUE	<0.0001
KIRC	eqtl-a-ENSG00000178999	AURKB	0.236582	0.000115157	TRUE	<0.0001
KIRC	eqtl-a-ENSG00000179593	ALOX15B	0.140952	7.88913e-05	TRUE	<0.0001
KIRC	eqtl-a-ENSG00000179869	ABCA13	0.0544993	0.000299177	TRUE	<0.0001
KIRC	eqtl-a-ENSG00000179934	CCR8	0.164429	8.1102e-05	TRUE	<0.0001
KIRC	eqtl-a-ENSG00000180644	PRF1	0.0591254	0.000130327	TRUE	<0.0001
KIRC	eqtl-a-ENSG00000184574	LPAR5	0.37532	0.000151841	TRUE	<0.0001
KIRC	eqtl-a-ENSG00000186074	CD300LF	0.234705	0.000135571	TRUE	<0.0001
KIRC	eqtl-a-ENSG00000186529	CYP4F3	0.465081	0.000278813	TRUE	<0.0001
KIRC	eqtl-a-ENSG00000187037	GPR141	0.423652	0.000244028	TRUE	<0.0001
KIRC	eqtl-a-ENSG00000188389	PDCD1	0.360472	0.00028758	TRUE	<0.0001
KIRC	eqtl-a-ENSG00000197272	IL27	0.122909	4.1914e-05	TRUE	<0.0001
KIRC	eqtl-a-ENSG00000197540	GZMM	0.106063	7.8232e-05	TRUE	<0.0001
KIRC	eqtl-a-ENSG00000198851	CD3E	0.0804762	7.92237e-05	TRUE	<0.0001
KIRC	eqtl-a-ENSG00000204410	MSH5	0.569062	0.000281443	TRUE	<0.0001
KIRC	eqtl-a-ENSG00000205560	CPT1B	0.761464	0.000105161	TRUE	<0.0001
KIRC	eqtl-a-ENSG00000213809	KLRK1	0.17635	0.000167503	TRUE	<0.0001
KIRC	eqtl-a-ENSG00000213918	DNASE1	0.409955	0.000103421	TRUE	<0.0001
KIRC	eqtl-a-ENSG00000226979	LTA	0.897904	0.00096627	TRUE	<0.0001
KIRC	eqtl-a-ENSG00000244482	LILRA6	0.112615	6.73109e-05	TRUE	<0.0001
KIRC	eqtl-a-ENSG00000254521	SIGLEC12	0.21	0.000109292	TRUE	<0.0001
KIRC	eqtl-a-ENSG00000137285	TUBB2B	0.0732161	9.97539e-05	TRUE	<0.0001
KIRC	eqtl-a-ENSG00000104814	MAP4K1	0.0471908	6.17193e-05	TRUE	<0.0001
KIRC	eqtl-a-ENSG00000110448	CD5	0.0485096	4.25577e-05	TRUE	<0.0001
KIRC	eqtl-a-ENSG00000154764	WNT7A	0.0492871	0.000196284	TRUE	<0.0001
KIRC	eqtl-a-ENSG00000138028	CGREF1	0.0439773	9.11309e-05	TRUE	<0.0001
KIRC	eqtl-a-ENSG00000137101	CD72	0.084307	6.48877e-05	TRUE	<0.0001
KIRC	eqtl-a-ENSG00000196188	CTSE	0.134817	7.43241e-05	TRUE	<0.0001
KIRC	eqtl-a-ENSG00000145386	CCNA2	0.0398361	7.55721e-05	TRUE	<0.0001
KIRC	eqtl-a-ENSG00000142303	ADAMTS10	0.0591373	4.34813e-05	TRUE	<0.0001
KIRC	eqtl-a-ENSG00000088002	SULT2B1	0.0367989	3.71474e-05	TRUE	<0.0001
KIRC	eqtl-a-ENSG00000100429	HDAC10	0.138924	0.000128182	TRUE	<0.0001
KIRC	eqtl-a-ENSG00000171208	NETO2	0.0308166	5.53409e-05	TRUE	<0.0001
KIRC	eqtl-a-ENSG00000163873	GRIK3	0.0284	5.0837e-05	TRUE	<0.0001
KIRC	eqtl-a-ENSG00000091879	ANGPT2	0.0402073	0.000108065	TRUE	<0.0001
KIRC	eqtl-a-ENSG00000151062	CACNA2D4	0.0265701	5.12537e-05	TRUE	<0.0001
KIRC	eqtl-a-ENSG00000148204	CRB2	0.0242873	9.13573e-05	TRUE	<0.0001
KIRC	eqtl-a-ENSG00000213199	ASIC3	0.0729743	5.4191e-05	TRUE	<0.0001
KIRC	eqtl-a-ENSG00000197471	SPN	0.023986	4.29296e-05	TRUE	<0.0001
KIRC	eqtl-a-ENSG00000085999	RAD54L	0.0183344	6.0705e-05	TRUE	<0.0001
KIRC	eqtl-a-ENSG00000106236	NPTX2	0.0198421	3.76904e-05	TRUE	<0.0001
KIRC	eqtl-a-ENSG00000189430	NCR1	0.0174531	6.5627e-05	TRUE	<0.0001
KIRC	eqtl-a-ENSG00000242252	BGLAP	0.0144048	8.53628e-05	TRUE	<0.0001
KIRC	eqtl-a-ENSG00000083454	P2RX5	0.0137734	2.53366e-05	TRUE	<0.0001
KIRC	eqtl-a-ENSG00000250506	CDK3	0.0130235	6.66317e-05	TRUE	<0.0001
KIRC	eqtl-a-ENSG00000121594	CD80	0.010365	2.01581e-05	TRUE	<0.0001
KIRC	eqtl-a-ENSG00000126500	FLRT1	0.0101427	6.06094e-05	TRUE	<0.0001
KIRC	eqtl-a-ENSG00000049089	COL9A2	0.00797461	2.34533e-05	TRUE	<0.0001
KIRC	eqtl-a-ENSG00000169860	P2RY1	0.00584553	2.54819e-05	TRUE	<0.0001
KIRC	eqtl-a-ENSG00000018280	SLC11A1	1.07326	0.000184032	TRUE	NA
KIRC	eqtl-a-ENSG00000026297	RNASET2	1.0123	0.000188013	TRUE	NA
KIRC	eqtl-a-ENSG00000049247	UTS2	1.91896	0.000108581	TRUE	NA
KIRC	eqtl-a-ENSG00000064886	CHI3L2	1.16302	0.000347229	TRUE	NA
KIRC	eqtl-a-ENSG00000074803	SLC12A1	2.61161	0.000488763	TRUE	NA
KIRC	eqtl-a-ENSG00000134202	GSTM3	1.07255	0.000381199	TRUE	NA
KIRC	eqtl-a-ENSG00000135218	CD36	1.25978	0.000209744	TRUE	NA
KIRC	eqtl-a-ENSG00000143297	FCRL5	1.16386	0.000300406	TRUE	NA
KIRC	eqtl-a-ENSG00000158517	NCF1	1.00962	0.0001511	TRUE	NA
KIRC	eqtl-a-ENSG00000158869	FCER1G	1.1662	0.00047481	TRUE	NA
KIRC	eqtl-a-ENSG00000163735	CXCL5	1.54695	0.000278798	TRUE	NA
KIRC	eqtl-a-ENSG00000172543	CTSW	2.80094	0.000558158	TRUE	NA
KIRC	eqtl-a-ENSG00000196735	HLA-DQA1	7.15763	0.000647612	TRUE	NA
KIRC	eqtl-a-ENSG00000204305	AGER	1.34737	0.000937365	TRUE	NA
KIRC	eqtl-a-ENSG00000204482	LST1	2.24857	0.000418308	TRUE	NA
KIRC	eqtl-a-ENSG00000237541	HLA-DQA2	6.20042	0.000579785	TRUE	NA
KIRC	eqtl-a-ENSG00000241106	HLA-DOB	3.94153	0.000420007	TRUE	NA
