# Supplementary material
Source: Research Square preprint supplement (doi:10.21203/rs.3.rs-9651090/v1)
Supplement: Supplementary file 5 [file 7fb547e8f77e2a64a8e4bfbb.xlsx]

## Sheet: 66 compounds
Supplementary Table 9. Shared small-molecule compounds predicted by GraphBAN models trained on BindingDB and BioSNAP
	Gene_Name	ID	Y_bindingdb	bindingdb_pred	Y_biosnap	biosnap_pred
1	AMH	ZINC000252286875	1	0.755066	1	0.594514
2	AMH	ZINC000252286876	1	0.743794	1	0.610901
3	AMH	ZINC000252286878	1	0.728413	1	0.56979
4	AMH	ZINC000252286877	1	0.738218	1	0.597743
5	AMH	ZINC000008214681	1	0.512444	1	0.505745
6	ALDH6A1	ZINC000085537017	1	0.567501	1	0.556926
7	AMH	ZINC000085537017	1	0.602353	1	0.62121
8	ASIC3	ZINC000085537017	1	0.530252	1	0.730608
9	PLK1	ZINC000095564694	1	0.722908	1	0.711749
10	ALDH6A1	ZINC000003808779	1	0.554305	1	0.576403
11	ALDH6A1	ZINC000003918138	1	0.94251	1	0.589789
12	PLK1	ZINC000003918138	1	0.707862	1	0.839716
13	PLK1	ZINC000222731806	1	0.500008	1	0.893829
14	ALDH6A1	ZINC000169746649	1	0.699696	1	0.517771
15	PLK1	ZINC000003830276	1	0.922334	1	0.828016
16	PLK1	ZINC000000014864	1	0.501566	1	0.638529
17	PLK1	ZINC000008214629	1	0.846711	1	0.816783
18	ASIC3	ZINC000004474564	1	0.786463	1	0.505301
19	ALDH6A1	ZINC000000538266	1	0.546408	1	1
20	PLK1	ZINC000001546066	1	0.501877	1	0.677831
21	ALDH6A1	ZINC000035024346	1	0.518217	1	0.540356
22	PLK1	ZINC000008214662	1	0.830706	1	0.812617
23	ASIC3	ZINC000000057147	1	0.54072	1	0.561705
24	PLK1	ZINC000043194409	1	0.549532	1	0.840501
25	PLK1	ZINC000043207237	1	0.576355	1	0.860579
26	PLK1	ZINC000145808877	1	0.576236	1	0.860686
27	ASIC3	ZINC000000057146	1	0.54072	1	0.561705
28	PLK1	ZINC000000403609	1	0.569231	1	0.611786
29	PLK1	ZINC000000002176	1	0.569231	1	0.611786
30	PLK1	ZINC000000057206	1	0.503728	1	0.607831
31	PLK1	ZINC000001533877	1	0.556505	1	0.619101
32	PLK1	ZINC000000020228	1	0.503728	1	0.607831
33	PLK1	ZINC000000020230	1	0.527269	1	0.727201
34	PLK1	ZINC000000057435	1	0.503344	1	0.552092
35	PLK1	ZINC000000007601	1	0.527269	1	0.727201
36	PLK1	ZINC000001531009	1	0.524354	1	0.558201
37	ALDH6A1	ZINC000002519740	1	0.68442	1	0.528433
38	AMH	ZINC000002519740	1	0.506339	1	0.527191
39	ASIC3	ZINC000002519740	1	0.523023	1	0.526824
40	PLK1	ZINC000003803652	1	0.539646	1	0.648642
41	PLK1	ZINC000000049153	1	0.503376	1	0.593484
42	ASIC3	ZINC000100005670	1	0.669464	1	0.539748
43	PLK1	ZINC000003875342	1	0.741702	1	0.741223
44	ALDH6A1	ZINC000100007011	1	0.52192	1	0.58259
45	PLK1	ZINC000003801919	1	0.659603	1	0.58711
46	ALDH6A1	ZINC000100071256	1	0.52192	1	0.58259
47	PLK1	ZINC000003812862	1	0.653011	1	0.541884
48	ASIC3	ZINC000000001084	1	0.612975	1	0.581857
49	ASIC3	ZINC000001530572	1	0.509456	1	0.627987
50	ALDH6A1	ZINC000001530701	1	0.509915	1	0.57571
51	PLK1	ZINC000003830813	1	0.565515	1	0.688445
52	ALDH6A1	ZINC000003581355	1	0.500224	1	0.636012
53	ALDH6A1	ZINC000003776875	1	0.580603	1	0.677464
54	ASIC3	ZINC000008214651	1	0.601888	1	0.943156
55	PLK1	ZINC000008214651	1	0.500786	1	0.97212
56	ALDH6A1	ZINC000001530810	1	0.829809	1	0.721747
57	ALDH6A1	ZINC000004097392	1	0.580603	1	0.677464
58	ASIC3	ZINC000001530810	1	0.597064	1	0.841063
59	PLK1	ZINC000001530810	1	0.573511	1	0.85077
60	ALDH6A1	ZINC000001554392	1	0.719789	1	0.530062
61	AMH	ZINC000000968303	1	0.520366	1	0.680217
62	ALDH6A1	ZINC000001554588	1	0.664845	1	0.529266
63	ASIC3	ZINC000001554588	1	0.561355	1	0.739367
64	PLK1	ZINC000001554588	1	0.505341	1	0.799841
65	PLK1	ZINC000006827695	1	0.662598	1	0.522397
66	PLK1	ZINC000012503156	1	0.668699	1	0.588651
67	PLK1	ZINC000100061056	1	0.668686	1	0.588465
68	ALDH6A1	ZINC000003008621	1	0.541158	1	0.634515
69	ALDH6A1	ZINC000003782550	1	0.509676	1	0.782397
70	ALDH6A1	ZINC000245224194	1	0.777072	1	0.995198
71	ASIC3	ZINC000008101109	1	0.550188	1	0.58315
72	ALDH6A1	ZINC000003809490	1	0.665957	1	0.634156
73	ALDH6A1	ZINC000003831040	1	0.628555	1	0.628459
74	ASIC3	ZINC000003809490	1	0.633755	1	0.787424
75	ASIC3	ZINC000003831040	1	0.595381	1	0.798984
76	PLK1	ZINC000003809490	1	0.623994	1	0.789352
77	PLK1	ZINC000003831040	1	0.570305	1	0.832979
78	ALDH6A1	ZINC000008214573	1	0.679626	1	0.581952
79	ASIC3	ZINC000008214573	1	0.582429	1	0.762993
80	PLK1	ZINC000008214573	1	0.620892	1	0.79452
81	ALDH6A1	ZINC000004658603	1	0.539099	1	0.556626
82	ASIC3	ZINC000004658603	1	0.50278	1	0.744571
83	ASIC3	ZINC000008034120	1	0.533544	1	0.710616
