# Supplementary material
Source: Research Square preprint supplement (doi:10.21203/rs.3.rs-9651090/v1)
Supplement: Supplementary file 6 [file 9544daca9a6f73b981004a0c.xlsx]

## Sheet: Sheet1
Supplementary Table1 Integrated catalogue of 5,883 druggable genes used for candidate gene screening in KIRC
gene name
A1BG
A2M
A2ML1
AADACL2
AADAT
AAK1
AANAT
AATK
ABAT
ABCA1
ABCA12
ABCA13
ABCA2
ABCA3
ABCA4
ABCA5
ABCA7
ABCB1
ABCB11
ABCB4
ABCB5
ABCB6
ABCB7
ABCB8
ABCC1
ABCC10
ABCC11
ABCC12
ABCC2
ABCC3
ABCC4
ABCC5
ABCC6
ABCC8
ABCC9
ABCG1
ABCG2
ABCG4
ABCG8
ABHD12
ABHD16A
ABHD6
ABI1
ABI3BP
ABL1
ABL2
ABO
ACACA
ACACB
ACADM
ACADSB
ACAN
ACAT1
ACAT2
ACE
ACE2
ACHE
ACKR1
ACKR2
ACKR3
ACKR4
ACLY
ACO1
ACP1
ACP2
ACP3
ACP5
ACP6
ACPP
ACR
ACRBP
ACSS2
ACSS3
ACTA1
ACTB
ACTC1
ACTG1
ACTN1
ACTN2
ACTN4
ACTR2
ACVR1
ACVR1B
ACVR1C
ACVR2A
ACVR2B
ACVRL1
ACY3
ACYP2
AD5
ADA
ADAM10
ADAM12
ADAM17
ADAM23
ADAM28
ADAM32
ADAM33
ADAM8
ADAM9
ADAMDEC1
ADAMTS1
ADAMTS10
ADAMTS12
ADAMTS13
ADAMTS14
ADAMTS15
ADAMTS16
ADAMTS17
ADAMTS18
ADAMTS19
ADAMTS2
ADAMTS20
ADAMTS3
ADAMTS4
ADAMTS5
ADAMTS6
ADAMTS7
ADAMTS8
ADAMTS9
ADAMTSL1
ADAMTSL3
ADAMTSL4
ADC
ADCK3
ADCK4
ADCY1
ADCY10
ADCY2
ADCY5
ADCY6
ADCY9
ADCYAP1
ADCYAP1R1
ADD1
ADGRB1
ADGRG3
ADGRL3
ADGRV1
ADH1A
ADH1B
ADH1C
ADH4
ADH5
ADH6
ADH7
ADHFE1
ADIPOQ
ADK
ADM
ADM2
ADO
ADORA1
ADORA2A
ADORA2A-AS1
ADORA2B
ADORA3
ADRA1A
ADRA1B
ADRA1D
ADRA2A
ADRA2B
ADRA2C
ADRB1
ADRB2
ADRB3
ADRBK1
ADRBK2
ADRM1
ADSS2
AEBP1
AFM
AFP
AGA
AGBL4
AGER
AGGF1
AGPAT2
AGR2
AGR3
AGRN
AGRP
AGT
AGTR1
AGTR2
AHCY
AHR
AHRR
AHSG
AICDA
AIFM1
AIMP1
AIP
AK2
AK4
AKAP13
AKR1A1
AKR1B1
AKR1B10
AKR1C1
AKR1C2
AKR1C3
AKR1C4
AKR1D1
AKR7A2
AKT1
AKT1S1
AKT2
AKT3
ALAD
ALB
ALCAM
ALDH16A1
ALDH1A1
ALDH1A2
ALDH1A3
ALDH1B1
ALDH1L1
ALDH1L2
ALDH2
ALDH3A1
ALDH3A2
ALDH3B1
ALDH3B2
ALDH4A1
ALDH5A1
ALDH6A1
ALDH7A1
ALDH8A1
ALDH9A1
ALDOA
ALG10
ALK
ALOX12
ALOX12B
ALOX15
ALOX15B
ALOX5
ALOX5AP
ALOXE3
ALPG
ALPI
ALPL
ALPP
ALPPL2
AMACR
AMBN
AMBP
AMD1
AMELX
AMELY
AMH
AMHR2
AMICA1
AMOT
AMPD1
AMPD2
AMPD3
AMTN
AMY1A
AMY1B
AMY1C
AMY2A
AMY2B
ANG
ANGPT1
ANGPT2
ANGPT4
ANGPTL1
ANGPTL2
ANGPTL3
ANGPTL4
ANGPTL6
ANGPTL7
ANKFN1
ANKK1
ANKRD30B
ANKS1B
ANO1
ANO2
ANPEP
ANTXR2
ANXA1
ANXA2
ANXA5
AOAH
AOC1
AOC2
AOC3
AOPEP
AOX1
APAF1
APBA1
APBB1
APC
APCS
APEH
APEX1
APH1A
APH1B
APLF
APLN
APLNR
APLP1
APOA1
APOA1BP
APOA2
APOA4
APOA5
APOB
APOBEC3A
APOBEC3B
APOBEC3F
APOBEC3G
APOC1
APOC2
APOC3
APOC4-APOC2
APOD
APOE
APOF
APOH
APOL1
APOM
APOO
APP
APRT
AQP1
AQP10
AQP2
AQP3
AQP4
AQP5
AQP6
AQP7
AQP8
AQP9
AR
ARAF
ARAP2
AREG
AREGB
ARF6
ARG1
ARG2
ARHGAP12
ARHGEF28
ARID1A
ARID5B
ARMS2
ARNT
ARRB1
ARRB2
ARSA
ARSB
ARSG
ARSI
ART1
ART4
ARTN
ASGR1
ASIC1
ASIC2
ASIC3
ASIC4
ASIC5
ASIP
ASL
ASNS
ASPG
ASPH
ASPN
ASS1
ASXL1
ATAD2
ATAD2B
ATAD5
ATAT1
ATF1
ATF2
ATF3
ATF4
ATG16L1
ATG4B
ATG4C
ATG5
ATIC
ATM
ATP10A
ATP12A
ATP1A1
ATP1A2
ATP1A3
ATP1A4
ATP1B1
ATP1B2
ATP1B3
ATP2A1
ATP2A2
ATP2A3
ATP2B1
ATP2B2
ATP2B3
ATP2B4
ATP2C1
ATP2C2
ATP4A
ATP4B
ATP5F1D
ATP5F1E
ATP6AP2
ATP6V1B1
ATP6V1B2
ATP7A
ATP7B
ATR
ATRAID
ATRN
ATRX
ATXN1L
ATXN2
AURKA
AURKAIP1
AURKB
AURKC
AVP
AVPR1A
AVPR1B
AVPR2
AXIN1
AXIN2
AXL
AZGP1
AZIN1
AZU1
B2M
B3GAT1
B4GALNT1
B4GALT1
B4GALT2
BACE1
BACE2
BACH1
BAD
BAG6
BAK1
BAMBI
BAP1
BARD1
BAX
BAZ2A
BAZ2B
BBOX1
BCAM
BCAN
BCAR1
BCAR3
BCAT1
BCAT2
BCHE
BCL2
BCL2A1
BCL2L1
BCL2L10
BCL2L11
BCL2L2
BCL2L2-PABPN1
BCL6
BCOR
BCORL1
BCR
BDKRB1
BDKRB2
BDNF
BDNF-AS
BGLAP
BGN
BHLHE40
BHMT
BHMT2
BICD1
BIRC2
BIRC3
BIRC5
BIRC7
BIRC8
BLK
BLM
BLVRA
BLVRB
BMP1
BMP10
BMP15
BMP2
BMP2K
BMP3
BMP4
BMP5
BMP6
BMP7
BMP8A
BMP8B
BMPER
BMPR1A
BMPR1B
BMPR2
BMX
BOC
BOLA1
BOLA3
BPHL
BPI
BPIFA1
BPIFA2
BPIFB1
BPIFB2
BPIFB3
BPIFB4
BPIFB6
BPIFC
BPNT1
BPTF
BRAF
BRCA1
BRCA2
BRD1
BRD2
BRD3
BRD4
BRD7
BRD9
BRDT
BRPF1
BRPF3
BRS3
BRSK1
BRSK2
BSG
BSPH1
BST1
BST2
BTC
BTD
BTF3P11
BTK
BTLA
BTN1A1
BTN3A1
BTN3A2
BTN3A3
BTNL8
BUB1
BUB1B
C10orf54
C10ORF67
C11ORF65
C11orf83
C12orf39
C16orf89
C17orf72
C17orf99
C19orf10
C1QA
C1QB
C1QC
C1QL1
C1QL2
C1QTNF5
C1QTNF6
C1QTNF8
C1QTNF9
C1QTNF9B
C1R
C1RL
C1S
C2
C2orf40
C3
C3AR1
C4A
C4B
C4BPA
C4BPB
C5
C5AR1
C5AR2
C6
C6orf120
C6ORF15
C6orf25
C7
C8A
C8B
C8G
C8ORF34
C8orf44-SGK3
C9
C9ORF72
C9orf96
CA1
CA10
CA11
CA12
CA13
CA14
CA2
CA3
CA4
CA5A
CA5B
CA6
CA7
CA8
CA9
CACNA1A
CACNA1B
CACNA1C
CACNA1D
CACNA1E
CACNA1F
CACNA1G
CACNA1H
CACNA1I
CACNA1S
CACNA2D1
CACNA2D2
CACNA2D3
CACNA2D4
CACNB1
CACNB2
CACNB3
CACNB4
CACNG1
CACNG2
CACNG3
CACNG4
CACNG5
CACNG6
CACNG7
CACNG8
CAD
CADM2
CADM3
CALCA
CALCB
CALCR
CALCRL
CALM1
CALM2
CALM3
CALR
CALU
CALY
CAMK1
CAMK1D
CAMK1G
CAMK2A
CAMK2B
CAMK2D
CAMK2G
CAMK4
CAMKK1
CAMKK2
CAMKV
CAMLG
CAMP
CANX
CAPG
CAPN1
CAPN10
CAPN2
CAPNS1
CAPZA1
CAPZA2
CARD9
CARM1
CARTPT
CASK
CASP1
CASP10
CASP12
CASP14
CASP2
CASP3
CASP4
CASP5
CASP6
CASP7
CASP8
CASP9
CASQ2
CASR
CAST
CAT
CATSPER1
CATSPER2
CATSPER3
CATSPER4
CAV1
CBFB
CBL
CBLB
CBLC
CBLN1
CBLN3
CBLN4
CBR1
CBR3
CBS
CBX1
CCDC3
CCDC80
CCHCR1
CCK
CCKAR
CCKBR
CCL1
CCL11
CCL13
CCL14
CCL15-CCL14
CCL16
CCL17
CCL18
CCL19
CCL2
CCL20
CCL21
CCL22
CCL23
CCL24
CCL25
CCL26
CCL27
CCL28
CCL3
CCL3L1
CCL3L3
CCL4
CCL4L1
CCL4L2
CCL5
CCL7
CCL8
CCN1
CCN2
CCNA1
CCNA2
CCNB1
CCNB2
CCNB3
CCND1
CCND2
CCND3
CCNE1
CCNE2
CCNG1
CCNH
CCNK
CCNT1
CCR1
CCR10
CCR2
CCR3
CCR4
CCR5
CCR6
CCR7
CCR8
CCR9
CCRL2
CD101
CD109
CD14
CD151
CD160
CD163
CD163L1
CD164
CD164L2
CD177
CD180
CD19
CD1A
CD1B
CD1C
CD1D
CD1E
CD2
CD200
CD200R1
CD207
CD209
CD22
CD226
CD244
CD247
CD248
CD27
CD274
CD276
CD28
CD300A
CD300C
CD300E
CD300LB
CD300LD
CD300LF
CD300LG
CD302
CD320
CD33
CD34
CD36
CD37
CD38
CD3D
CD3E
CD3G
CD4
CD40
CD40LG
CD44
CD46
CD47
CD48
CD5
CD52
CD53
CD55
CD58
CD59
CD5L
CD6
CD63
CD68
CD69
CD7
CD70
CD72
CD74
CD79A
CD79B
CD80
CD81
CD82
CD83
CD84
CD86
CD8A
CD8B
CD9
CD93
CD96
CD97
CD99
CDA
CDC25A
CDC25B
CDC25C
CDC37
CDC42
CDC42BPA
CDC42BPB
CDC42BPG
CDC5L
CDC7
CDCP1
CDH1
CDH11
CDH13
CDH17
CDH2
CDH23
CDH3
CDH5
CDK1
CDK10
CDK11A
CDK11B
CDK12
CDK13
CDK14
CDK15
CDK16
CDK17
CDK18
CDK19
CDK2
CDK20
CDK3
CDK4
CDK5
CDK5R1
CDK6
CDK7
CDK8
CDK9
CDKAL1
CDKL1
CDKL2
CDKL3
CDKL4
CDKL5
CDKN1A
CDKN1B
CDKN1C
CDKN2A
CDKN2B
CDKN2B-AS1
CDKN2C
CDKN2D
CDKN3
CDNF
CDS1
CDSN
CDX2
CEACAM1
CEACAM16
CEACAM3
CEACAM5
CEACAM6
CEACAM7
CEACAM8
CEBPA
CECR1
CECR2
CEL
CELA1
CELA2A
CELA2B
CELF4
CELSR1
CELSR2
CELSR3
CENPE
CEP43
CEP68
CEP72
CER1
CERK
CERKL
CERS6
CES1
CES1P1
CES2
CES3
CES4A
CES5A
CETP
CFAP44
CFB
CFC1
CFD
CFH
CFHR1
CFHR2
CFHR3
CFHR4
CFHR5
CFI
CFL1
CFLAR
CFP
CFTR
CGA
CGB
CGB2
CGB5
CGB7
CGB8
CGREF1
CH25H
CHAD
CHADL
CHAT
CHD1
CHD4
CHEK1
CHEK2
CHGA
CHGB
CHI3L1
CHI3L2
CHIA
CHID1
CHIT1
CHKA
CHL1
CHN2
CHPT1
CHRD
CHRDL1
CHRDL2
CHRFAM7A
CHRM1
CHRM2
CHRM3
CHRM4
CHRM5
CHRNA1
CHRNA10
CHRNA2
CHRNA3
CHRNA4
CHRNA5
CHRNA6
CHRNA7
CHRNA9
CHRNB1
CHRNB2
CHRNB3
CHRNB4
CHRND
CHRNE
CHRNG
CHST1
CHST10
CHST11
CHST12
CHST13
CHST2
CHST3
CHST4
CHST5
CHST6
CHST7
CHST8
CHST9
CHSY1
CHUK
CHURC1
CIC
CILP
CILP2
CIP2A
CISD1
CISH
CIT
CKLF
CKM
CLC
CLCA1
CLCA2
CLCA3P
CLCA4
CLCC1
CLCF1
CLCN1
CLCN2
CLCN3
CLCN4
CLCN5
CLCN6
CLCN7
CLCNKA
CLCNKB
CLDN18
CLEC10A
CLEC11A
CLEC12A
CLEC14A
CLEC3A
CLEC3B
CLEC4C
CLEC4E
CLEC4M
CLK1
CLK2
CLK3
CLK4
CLNK
CLOCK
CLPS
CLPSL2
CLSTN1
CLU
CLUL1
CMA1
CMKLR1
CMKLR2
CMPK1
CMTM8
CNDP1
CNGA1
CNGA2
CNGA3
CNGA4
CNGB1
CNGB3
CNP
CNPY4
CNR1
CNR2
CNTF
CNTFR
CNTN1
CNTN2
CNTN4
CNTNAP3
COCH
COIL
COL10A1
COL11A1
COL11A2
COL12A1
COL13A1
COL14A1
COL15A1
COL16A1
COL17A1
COL18A1
COL19A1
COL1A1
COL1A2
COL20A1
COL21A1
COL22A1
COL23A1
COL24A1
COL25A1
COL26A1
COL27A1
COL28A1
COL2A1
COL3A1
COL4A1
COL4A2
COL4A3
COL4A4
COL4A5
COL4A6
COL5A1
COL5A2
COL5A3
COL6A1
COL6A2
COL6A3
COL6A5
COL6A6
COL7A1
COL8A1
COL8A2
COL9A1
COL9A2
COL9A3
COLEC10
COLQ
COMP
COMT
COP1
COPA
COQ2
COQ8B
CORIN
CORO7
CORT
CP
CPA1
CPA2
CPA3
CPA4
CPA5
CPA6
CPAMD8
CPB1
CPB2
CPD
CPE
CPM
CPN1
CPN2
CPOX
CPQ
CPS1
CPT1A
CPT1B
CPT2
CPXM1
CPXM2
CPZ
CR1
CR1L
CR2
CRABP2
CRAT
CRB1
CRB2
CRBN
CREB1
CREBBP
CREG1
CREG2
CRELD2
CRH
CRHBP
CRHR1
CRHR2
CRIM1
CRISP1
CRISP2
CRISP3
CRISPLD2
CRKL
CRLF1
CRLF2
CRMP1
CROT
CRP
CRTAC1
CRTAM
CRTAP
CRTC1
CRTC2
CRY1
CRY2
CRYBG2
CRYGD
CRYZ
CSF1
CSF1R
CSF2
CSF2RA
CSF2RB
CSF3
CSF3R
CSH1
CSH2
CSHL1
CSK
CSMD1
CSN1S1
CSN2
CSN3
CSNK1A1
CSNK1A1L
CSNK1D
CSNK1E
CSNK1G1
CSNK1G2
CSNK1G3
CSNK2A1
CSNK2A2
CSNK2A3
CSPG4
CSPG5
CSRNP3
CSRP3
CST1
CST2
CST3
CST4
CST5
CST6
CST7
CST8
CST9
CST9L
CTAG1B
CTAG2
CTBS
CTDSP1
CTF1
CTGF
CTH
CTHRC1
CTLA4
CTNNA2
CTNNA3
CTNNB1
CTNNBL1
CTPS1
CTRB1
CTRB2
CTRC
CTRL
CTSA
CTSB
CTSC
CTSD
CTSE
CTSF
CTSG
CTSH
CTSK
CTSL
CTSO
CTSS
CTSV
CTSW
CTSZ
CUBN
CUL4A
CUX2
CX3CL1
CX3CR1
CXADR
CXCL1
CXCL10
CXCL11
CXCL12
CXCL13
CXCL14
CXCL16
CXCL17
CXCL2
CXCL3
CXCL5
CXCL6
CXCL8
CXCL9
CXCR1
CXCR2
CXCR3
CXCR4
CXCR5
CXCR6
CXXC4
CYB5D2
CYB5R1
CYB5R2
CYB5R3
CYB5R4
CYBA
CYBB
CYCSP5
CYP11A1
CYP11B1
CYP11B2
CYP17A1
CYP19A1
CYP1A1
CYP1A2
CYP1B1
CYP20A1
CYP21A2
CYP24A1
CYP26A1
CYP26B1
CYP26C1
CYP27A1
CYP27B1
CYP2A13
CYP2A6
CYP2A7
CYP2A7P1
CYP2B6
CYP2C18
CYP2C19
CYP2C8
CYP2C9
CYP2D6
CYP2E1
CYP2F1
CYP2J2
CYP2R1
CYP2S1
CYP2U1
CYP2W1
CYP39A1
CYP3A4
CYP3A43
CYP3A5
CYP3A7
CYP46A1
CYP4A11
CYP4A22
CYP4B1
CYP4F11
CYP4F12
CYP4F2
CYP4F22
CYP4F3
CYP4F8
CYP4V2
CYP4X1
CYP4Z1
CYP51A1
CYP7A1
CYP7B1
CYP8B1
CYR61
CYSLTR1
CYSLTR2
CYTH2
CYTL1
DAG1
DAGLA
DAGLB
DAND5
DAO
DAOA
DAPK1
DAPK2
DAPK3
DARC
DBF4
DBH
DBI
DBP
DCAF4
DCBLD1
DCD
DCK
DCLK1
DCLK2
DCLK3
DCN
DCPS
DCT
DCTD
DDAH1
DDB1
DDC
DDHD1
DDIT3
DDIT4
DDO
DDOST
DDR1
DDR2
DDRGK1
DDX3X
DDX43
DDX5
DEAF1
DEFA1
DEFA1B
DEFA3
DEFA4
DEFA5
DEFA6
DEFB1
DEFB103A
DEFB103B
DEFB104A
DEFB104B
DEFB105A
DEFB105B
DEFB106A
DEFB106B
DEFB107A
DEFB107B
DEFB108B
DEFB110
DEFB112
DEFB113
DEFB114
DEFB115
DEFB116
DEFB118
DEFB126
DEFB127
DEFB4A
DEGS1
DEPTOR
DERL1
DES
DFFB
DGAT1
DGAT2
DGCR6
DGKB
DHCR24
DHCR7
DHFR
DHFRL1
DHH
DHODH
DHPS
DHRS1
DHRS12
DHRS13
DHRS2
DHRS3
DHRS4
DHRS4L2
DHRS7
DHRS7B
DHRS7C
DHRS9
DHRSX
DHX36
DIABLO
DIAPH3
DIO1
DIO3
DKC1
DKK1
DKK2
DKK3
DKK4
DKKL1
DLD
DLG4
DLG5
DLK1
DLL3
DLL4
DMBT1
DMD
DMKN
DMP1
DMPK
DNAH8
DNAJA1
DNAJB1
DNAJB11
DNASE1
DNASE1L3
DNER
DNMT1
DNMT3A
DNMT3B
DNMT3L
DNPEP
DNTT
DOCK10
DOCK8
DOK5
DOT1L
DPEP1
DPEP2
DPEP3
DPP10
DPP4
DPP6
DPP7
DPP8
DPP9
DPT
DPYD
DPYS
DPYSL2
DPYSL3
DRAM1
DRAXIN
DRD1
DRD2
DRD3
DRD4
DRD5
DROSHA
DSCAM
DSE
DSG1
DSG3
DSP
DSPP
DST
DSTYK
DTNBP1
DTYMK
DUOX2
DUSP1
DUSP3
DUSP6
DUT
DYNC2H1
DYRK1A
DYRK1B
DYRK2
DYRK3
DYRK4
E2F1
E2F7
EBI3
EBP
EBPL
ECE1
ECE2
ECM1
ECM2
ECT2L
EDA
EDA2R
EDAR
EDDM3A
EDEM2
EDIL3
EDN1
EDN2
EDN3
EDNRA
EDNRB
EED
EEF1A1
EEF2
EEF2K
EFEMP1
EFEMP2
EFNA1
EFNA4
EFNA5
EFNB1
EFNB3
EFTUD1
EFTUD2
EGF
EGFL6
EGFL7
EGFL8
EGFLAM
EGFR
EGLN1
EGLN2
EGLN3
EGR1
EGR2
EHMT1
EHMT2
EIF2AK1
EIF2AK2
EIF2AK3
EIF2AK4
EIF2B1
EIF2S1
EIF3A
EIF4A1
EIF4E
EIF4EBP1
EIF4G1
EIF4H
EIF5A
ELANE
ELAVL1
ELK1
ELN
ELOVL3
ELOVL6
ELP5
ELSPBP1
EMC10
EMID1
EMILIN1
EMILIN2
EMILIN3
EML4
EMP1
EMP2
EMR2
EMR3
ENAM
ENC1
ENDOU
ENG
ENGASE
ENHO
ENO2
ENOSF1
ENOX1
ENOX2
ENPEP
ENPP1
ENPP2
ENPP3
ENPP5
ENPP6
ENPP7
ENTPD1
ENTPD2
ENTPD6
EP300
EPAS1
EPB41
EPCAM
EPDR1
EPGN
EPHA1
EPHA10
EPHA2
EPHA3
EPHA4
EPHA5
EPHA6
EPHA7
EPHA8
EPHB1
EPHB2
EPHB3
EPHB4
EPHB6
EPHX1
EPHX2
EPM2A
EPO
EPOR
EPRS1
EPX
EPYC
ERAP1
ERAP2
ERBB2
ERBB2IP
ERBB3
ERBB4
ERCC1
ERCC2
ERCC3
ERCC4
ERCC5
ERCC6
EREG
ERG
ERICH3
ERN1
ERN2
ERO1L
ERP29
ERP44
ERRFI1
ESAM
ESM1
ESR1
ESR2
ESRRA
ESRRB
ESRRG
ESYT2
ETFDH
ETNPPL
ETS2
ETV1
ETV4
ETV5
ETV6
EVI2B
EWSR1
EXO1
EXTL2
EYA2
EYS
EZH1
EZH2
EZR
F10
F11
F11R
F12
F13A1
F13B
F2
F2R
F2RL1
F2RL2
F2RL3
F3
F5
F7
F8
F9
FAAH
FAAH2
FABP1
FABP2
FABP3
FABP4
FABP5
FADD
FAM177A1
FAM178B
FAM19A1
FAM19A3
FAM19A4
FAM19A5
FAM20A
FAM20C
FAM3B
FAM3C
FANCA
FANCC
FANCD2
FAP
FARP2
FARS2
FAS
FASLG
FASN
FAT1
FAT3
FAT4
FBLN1
FBLN2
FBLN5
FBLN7
FBN1
FBN2
FBN3
FBP1
FBP2
FBXL17
FBXL19
FBXW7
FCAMR
FCAR
FCER1A
FCER1G
FCER2
FCGBP
FCGR1A
FCGR1CP
FCGR2A
FCGR2B
FCGR2C
FCGR3A
FCGR3B
FCGRT
FCN1
FCN2
FCN3
FCRL1
FCRL2
FCRL3
FCRL4
FCRL5
FCRL6
FCRLA
FDCSP
FDFT1
FDPS
FECH
FEN1
FER
FES
FFAR1
FFAR2
FFAR3
FFAR4
FGA
FGB
FGD4
FGF1
FGF10
FGF12
FGF16
FGF17
FGF18
FGF19
FGF2
FGF20
FGF21
FGF22
FGF23
FGF3
FGF4
FGF5
FGF6
FGF7
FGF8
FGF9
FGFBP1
FGFBP2
FGFBP3
FGFR1
FGFR1OP2
FGFR2
FGFR3
FGFR3P1
FGFR4
FGFRL1
FGG
FGL1
FGL2
FGR
FH
FHIT
FHL2
FIBIN
FIGF
FIP1L1
FJX1
FKBP10
FKBP11
FKBP14
FKBP15
FKBP1A
FKBP1B
FKBP1C
FKBP2
FKBP3
FKBP4
FKBP5
FKBP6
FKBP7
FKBP8
FKBP9
FKRP
FKTN
FLCN
FLG
FLI1
FLNA
FLRT1
FLRT2
FLT1
FLT3
FLT3LG
FLT4
FMO1
FMO2
FMO3
FMO4
FMO5
FMO6P
FMOD
FN1
FNDC5
FNTA
FNTB
FOLH1
FOLR1
FOLR2
FOLR3
FOS
FOSL1
FOXC2
FOXF2
FOXL2
FOXO1
FOXO3
FOXP3
FPGS
FPR1
FPR2
FPR3
FREM1
FREM3
FRK
FRZB
FSCN1
FSHB
FSHR
FSIP1
FST
FSTL1
FSTL3
FSTL4
FSTL5
FTH1
FTO
FUCA1
FUCA2
FURIN
FUS
FUT2
FUT3
FUT4
FXN
FXR2
FXYD2
FYN
FZD1
FZD10
FZD2
FZD3
FZD4
FZD5
FZD6
FZD7
FZD8
FZD9
G6PC
G6PD
GAA
GABBR1
GABBR2
GABPA
GABRA1
GABRA2
GABRA3
GABRA4
GABRA5
GABRA6
GABRB1
GABRB2
GABRB3
GABRD
GABRE
GABRG1
GABRG2
GABRG3
GABRP
GABRQ
GABRR1
GABRR2
GABRR3
GAD1
GAD2
GADD45A
GADD45G
GAK
GAL
GALC
GALE
GALK1
GALNS
GALNT1
GALNT14
[truncated: 3,885 more rows]
