# Supplementary material
Source: Research Square preprint supplement (doi:10.21203/rs.3.rs-9651090/v1)
Supplement: Supplementary file 7 [file d5cff1c7d95e4f88b38e8c24.xlsx]

## Sheet: Sensitivity analysis
Supplementary Table 4. Sensitivity analyses of Mendelian randomization results, including heterogeneity and horizontal pleiotropy tests
outcome	exposure	SYMBOL	heterogeneity				horizontal pleiotropy
			method	Q	Q_df	Q_p value	egger_intercept	se	p value
KIRC	eqtl-a-ENSG00000005471	ABCB4	Inverse variance weighted	53.3099	83	0.995376	0.0210184	0.0125069	0.0966576
KIRC	eqtl-a-ENSG00000005844	ITGAL	Inverse variance weighted	103.637	85	0.0827516	0.0359723	0.0105725	0.00102507
KIRC	eqtl-a-ENSG00000007402	CACNA2D2	Inverse variance weighted	101.648	87	0.134907	0.00203258	0.01506	0.892955
KIRC	eqtl-a-ENSG00000013725	CD6	Inverse variance weighted	18.8117	34	0.983708	-0.0346719	0.0150675	0.0278403
KIRC	eqtl-a-ENSG00000018280	SLC11A1	Inverse variance weighted	61.9259	106	0.999803	0.000858265	0.00926586	0.926377
KIRC	eqtl-a-ENSG00000023445	BIRC3	Inverse variance weighted	156.969	72	2.93002e-08	0.0576868	0.0129148	2.93085e-05
KIRC	eqtl-a-ENSG00000025708	TYMP	Inverse variance weighted	128.328	84	0.00133081	0.0206605	0.0182721	0.261434
KIRC	eqtl-a-ENSG00000026025	VIM	Inverse variance weighted	20.1199	34	0.971634	-0.0246318	0.0173385	0.164802
KIRC	eqtl-a-ENSG00000026297	RNASET2	Inverse variance weighted	66.4459	84	0.920691	0.000159146	0.0090581	0.986024
KIRC	eqtl-a-ENSG00000034510	TMSB10	Inverse variance weighted	43.8851	46	0.561244	0.144061	0.0404423	0.000883505
KIRC	eqtl-a-ENSG00000038945	MSR1	Inverse variance weighted	77.8128	79	0.516668	-0.000660758	0.0122296	0.95705
KIRC	eqtl-a-ENSG00000049089	COL9A2	Inverse variance weighted	0.118598	3	0.989516	0.0281505	0.0861637	0.77491
KIRC	eqtl-a-ENSG00000049247	UTS2	Inverse variance weighted	21.7384	59	0.999998	0.0146599	0.0107825	0.179221
KIRC	eqtl-a-ENSG00000049249	TNFRSF9	Inverse variance weighted	25.4556	54	0.99967	-0.0157289	0.0160126	0.330422
KIRC	eqtl-a-ENSG00000050438	SLC4A8	Inverse variance weighted	17.0137	26	0.908669	-0.0205677	0.018849	0.285596
KIRC	eqtl-a-ENSG00000050767	COL23A1	Inverse variance weighted	47.4647	38	0.139666	-0.069951	0.01684	0.000184915
KIRC	eqtl-a-ENSG00000054356	PTPRN	Inverse variance weighted	22.913	33	0.905322	0.0191207	0.0189055	0.319419
KIRC	eqtl-a-ENSG00000054967	RELT	Inverse variance weighted	72.4205	77	0.626494	0.0566156	0.012734	2.93862e-05
KIRC	eqtl-a-ENSG00000059804	SLC2A3	Inverse variance weighted	15.5112	29	0.980607	-0.0099419	0.0149318	0.510974
KIRC	eqtl-a-ENSG00000064886	CHI3L2	Inverse variance weighted	113.665	142	0.961477	-0.00766365	0.0086758	0.378558
KIRC	eqtl-a-ENSG00000066294	CD84	Inverse variance weighted	25.3342	37	0.926832	-0.0220677	0.0159949	0.176197
KIRC	eqtl-a-ENSG00000067715	SYT1	Inverse variance weighted	15.345	40	0.999851	-0.000579593	0.0250852	0.981684
KIRC	eqtl-a-ENSG00000071246	VASH1	Inverse variance weighted	76.8869	88	0.795305	0.00262514	0.0102619	0.798697
KIRC	eqtl-a-ENSG00000071909	MYO3B	Inverse variance weighted	62.7109	56	0.250516	0.00573153	0.0246772	0.817198
KIRC	eqtl-a-ENSG00000072694	FCGR2B	Inverse variance weighted	181.16	152	0.0532924	-0.0208765	0.00884477	0.0195371
KIRC	eqtl-a-ENSG00000073060	SCARB1	Inverse variance weighted	39.8473	31	0.132519	0.0339745	0.0168815	0.0532163
KIRC	eqtl-a-ENSG00000073737	DHRS9	Inverse variance weighted	90.9041	76	0.116807	-0.00085828	0.00882649	0.922796
KIRC	eqtl-a-ENSG00000073849	ST6GAL1	Inverse variance weighted	38.6441	40	0.531287	0.0462102	0.025225	0.0746083
KIRC	eqtl-a-ENSG00000074803	SLC12A1	Inverse variance weighted	96.6938	96	0.460942	0.00570853	0.00892347	0.523894
KIRC	eqtl-a-ENSG00000077984	CST7	Inverse variance weighted	137.063	141	0.578023	-0.00128972	0.00667633	0.8471
KIRC	eqtl-a-ENSG00000081052	COL4A4	Inverse variance weighted	4.20254	18	0.999661	-0.0663335	0.0464295	0.171209
KIRC	eqtl-a-ENSG00000083454	P2RX5	Inverse variance weighted	2.72719	6	0.842226	-0.131858	0.123174	0.333323
KIRC	eqtl-a-ENSG00000085999	RAD54L	Inverse variance weighted	2.39418	16	0.999964	-0.0917433	0.0972001	0.360196
KIRC	eqtl-a-ENSG00000088002	SULT2B1	Inverse variance weighted	4.51023	8	0.808409	-0.0428222	0.0309116	0.208493
KIRC	eqtl-a-ENSG00000088053	GP6	Inverse variance weighted	13.964	21	0.871141	0.011504	0.0222119	0.610196
KIRC	eqtl-a-ENSG00000089012	SIRPG	Inverse variance weighted	26.7315	48	0.994491	0.00576812	0.0128041	0.654428
KIRC	eqtl-a-ENSG00000091513	TF	Inverse variance weighted	12.507	25	0.981991	-0.00231397	0.0192464	0.905303
KIRC	eqtl-a-ENSG00000091879	ANGPT2	Inverse variance weighted	19.1431	15	0.207323	-0.0768899	0.0505743	0.150686
KIRC	eqtl-a-ENSG00000092929	UNC13D	Inverse variance weighted	24.8924	30	0.730245	-0.00924737	0.0271174	0.735553
KIRC	eqtl-a-ENSG00000095059	DHPS	Inverse variance weighted	17.1295	19	0.581096	-0.0319799	0.0321985	0.333773
KIRC	eqtl-a-ENSG00000096996	IL12RB1	Inverse variance weighted	33.883	68	0.999828	-0.000750762	0.0092265	0.93539
KIRC	eqtl-a-ENSG00000099194	SCD	Inverse variance weighted	70.2241	53	0.0567042	-0.081354	0.0167657	1.15166e-05
KIRC	eqtl-a-ENSG00000099377	HSD3B7	Inverse variance weighted	76.1374	85	0.743214	0.0101018	0.0118636	0.396917
KIRC	eqtl-a-ENSG00000099953	MMP11	Inverse variance weighted	12.6642	20	0.891323	-0.000243622	0.0251471	0.992371
KIRC	eqtl-a-ENSG00000100292	HMOX1	Inverse variance weighted	47.6263	42	0.254475	0.00852963	0.0137541	0.538589
KIRC	eqtl-a-ENSG00000100429	HDAC10	Inverse variance weighted	11.5992	17	0.823775	0.0697239	0.0444221	0.136076
KIRC	eqtl-a-ENSG00000100450	GZMH	Inverse variance weighted	42.1833	49	0.743823	-0.0487112	0.0188044	0.012657
KIRC	eqtl-a-ENSG00000100453	GZMB	Inverse variance weighted	51.3791	62	0.829861	0.0194635	0.0111555	0.0860651
KIRC	eqtl-a-ENSG00000101197	BIRC7	Inverse variance weighted	52.7862	42	0.122955	-0.0147543	0.0228273	0.52166
KIRC	eqtl-a-ENSG00000101255	TRIB3	Inverse variance weighted	38.8919	42	0.608183	-0.00373287	0.0206081	0.857154
KIRC	eqtl-a-ENSG00000101336	HCK	Inverse variance weighted	234.761	104	4.20611e-12	0.0778302	0.0114769	7.66763e-10
KIRC	eqtl-a-ENSG00000104332	SFRP1	Inverse variance weighted	5.68446	15	0.984575	-0.0831012	0.0458044	0.0911205
KIRC	eqtl-a-ENSG00000104814	MAP4K1	Inverse variance weighted	16.7763	23	0.820082	0.00835227	0.0583552	0.887492
KIRC	eqtl-a-ENSG00000104894	CD37	Inverse variance weighted	38.9693	40	0.516533	-0.00789046	0.0173604	0.651983
KIRC	eqtl-a-ENSG00000104899	AMH	Inverse variance weighted	6.89469	21	0.99834	-0.05289	0.0479204	0.282824
KIRC	eqtl-a-ENSG00000106236	NPTX2	Inverse variance weighted	6.00067	11	0.873319	-0.0778003	0.0867098	0.390676
KIRC	eqtl-a-ENSG00000106588	PSMA2	Inverse variance weighted	75.6363	58	0.0598059	-0.00899332	0.0124565	0.473259
KIRC	eqtl-a-ENSG00000108375	RNF43	Inverse variance weighted	22.8782	69	1	-0.0524265	0.0217027	0.0183988
KIRC	eqtl-a-ENSG00000109272	PF4V1	Inverse variance weighted	37.6086	21	0.014318	-0.11094	0.0434979	0.0190571
KIRC	eqtl-a-ENSG00000110448	CD5	Inverse variance weighted	6.84891	6	0.335047	-0.0576631	0.0547075	0.340118
KIRC	eqtl-a-ENSG00000110799	VWF	Inverse variance weighted	76.6839	75	0.424326	0.000819033	0.0104531	0.937759
KIRC	eqtl-a-ENSG00000110876	SELPLG	Inverse variance weighted	26.9123	56	0.999651	0.00861431	0.0180375	0.634843
KIRC	eqtl-a-ENSG00000111537	IFNG	Inverse variance weighted	24.8762	24	0.412511	0.103867	0.0472538	0.0382761
KIRC	eqtl-a-ENSG00000112715	VEGFA	Inverse variance weighted	98.5052	46	1.09201e-05	0.024498	0.0227853	0.288031
KIRC	eqtl-a-ENSG00000113263	ITK	Inverse variance weighted	36.5835	70	0.99967	0.00806353	0.0122979	0.514209
KIRC	eqtl-a-ENSG00000114013	CD86	Inverse variance weighted	109.795	110	0.487571	0.0133782	0.0116822	0.254643
KIRC	eqtl-a-ENSG00000114854	TNNC1	Inverse variance weighted	18.5656	42	0.999353	0.0291955	0.0244445	0.2392
KIRC	eqtl-a-ENSG00000115523	GNLY	Inverse variance weighted	169.582	174	0.58045	0.00598068	0.00651586	0.359967
KIRC	eqtl-a-ENSG00000117115	PADI2	Inverse variance weighted	75.3283	73	0.40294	-0.0333675	0.0100698	0.00144349
KIRC	eqtl-a-ENSG00000117322	CR2	Inverse variance weighted	27.3759	33	0.74301	-0.0812987	0.0276205	0.00599851
KIRC	eqtl-a-ENSG00000117560	FASLG	Inverse variance weighted	13.0856	20	0.87368	0.0644802	0.0221572	0.00897674
KIRC	eqtl-a-ENSG00000119711	ALDH6A1	Inverse variance weighted	7.80458	26	0.999783	0.0465241	0.0289626	0.120755
KIRC	eqtl-a-ENSG00000121594	CD80	Inverse variance weighted	2.61881	13	0.998997	0.0691003	0.0674108	0.325554
KIRC	eqtl-a-ENSG00000122223	CD244	Inverse variance weighted	55.5493	59	0.603477	0.0062809	0.0161187	0.698212
KIRC	eqtl-a-ENSG00000122861	PLAU	Inverse variance weighted	94.0791	90	0.36351	-0.0133177	0.0120661	0.272686
KIRC	eqtl-a-ENSG00000124102	PI3	Inverse variance weighted	101.23	104	0.558611	-0.0294152	0.00642577	1.31833e-05
KIRC	eqtl-a-ENSG00000125245	GPR18	Inverse variance weighted	14.8284	68	1	-0.0404075	0.0210964	0.059714
KIRC	eqtl-a-ENSG00000126231	PROZ	Inverse variance weighted	14.1153	16	0.590121	0.142449	0.0639715	0.041707
KIRC	eqtl-a-ENSG00000126500	FLRT1	Inverse variance weighted	8.44282	8	0.391451	-0.160855	0.168899	0.372625
KIRC	eqtl-a-ENSG00000126861	OMG	Inverse variance weighted	4.5018	27	1	0.0179867	0.0693108	0.797287
KIRC	eqtl-a-ENSG00000128285	MCHR1	Inverse variance weighted	54.0643	124	1	-0.0155781	0.0114161	0.17488
KIRC	eqtl-a-ENSG00000131203	IDO1	Inverse variance weighted	90.4034	90	0.46823	0.00750888	0.00955252	0.433918
KIRC	eqtl-a-ENSG00000131771	PPP1R1B	Inverse variance weighted	100.381	46	6.38759e-06	0.0769165	0.0312498	0.0177411
KIRC	eqtl-a-ENSG00000133466	C1QTNF6	Inverse variance weighted	4.49525	15	0.995606	0.0082847	0.0164592	0.622546
KIRC	eqtl-a-ENSG00000134121	CHL1	Inverse variance weighted	12.139	25	0.985413	-0.0448187	0.0313929	0.166271
KIRC	eqtl-a-ENSG00000134202	GSTM3	Inverse variance weighted	139.31	145	0.617653	0.00663214	0.00713214	0.353982
KIRC	eqtl-a-ENSG00000134242	PTPN22	Inverse variance weighted	36.318	57	0.985136	-0.0312745	0.01518	0.0440325
KIRC	eqtl-a-ENSG00000134460	IL2RA	Inverse variance weighted	29.5001	25	0.243552	0.0106113	0.0275298	0.703302
KIRC	eqtl-a-ENSG00000134827	TCN1	Inverse variance weighted	92.6178	103	0.758765	-0.0184127	0.0109681	0.0962621
KIRC	eqtl-a-ENSG00000135218	CD36	Inverse variance weighted	69.3819	126	0.99999	-0.00239873	0.0090747	0.791959
KIRC	eqtl-a-ENSG00000135245	HILPDA	Inverse variance weighted	23.1294	22	0.394453	-0.193852	0.0538269	0.00167796
KIRC	eqtl-a-ENSG00000136250	AOAH	Inverse variance weighted	217.92	161	0.00188672	0.0160995	0.00801042	0.0461315
KIRC	eqtl-a-ENSG00000137101	CD72	Inverse variance weighted	10.2636	23	0.989525	-0.00897056	0.0224315	0.69308
KIRC	eqtl-a-ENSG00000137285	TUBB2B	Inverse variance weighted	12.6007	12	0.398717	-0.0602145	0.0538081	0.286956
KIRC	eqtl-a-ENSG00000137757	CASP5	Inverse variance weighted	197.065	182	0.210824	-0.0254554	0.00636519	9.2508e-05
KIRC	eqtl-a-ENSG00000137825	ITPKA	Inverse variance weighted	16.4887	52	0.999999	0.046381	0.0178834	0.012368
KIRC	eqtl-a-ENSG00000138028	CGREF1	Inverse variance weighted	5.93407	27	0.999993	0.0266481	0.0388497	0.49883
KIRC	eqtl-a-ENSG00000138755	CXCL9	Inverse variance weighted	6.36228	27	0.999986	0.0162927	0.0256936	0.531547
KIRC	eqtl-a-ENSG00000138798	EGF	Inverse variance weighted	46.0076	54	0.772057	0.0214728	0.0116209	0.0702192
KIRC	eqtl-a-ENSG00000140678	ITGAX	Inverse variance weighted	144.763	146	0.513375	-0.0434279	0.00748255	3.92374e-08
KIRC	eqtl-a-ENSG00000141526	SLC16A3	Inverse variance weighted	48.6837	44	0.290087	0.0321289	0.0148125	0.0356542
KIRC	eqtl-a-ENSG00000142173	COL6A2	Inverse variance weighted	80.4909	90	0.753398	-0.00638448	0.0120608	0.597874
KIRC	eqtl-a-ENSG00000142303	ADAMTS10	Inverse variance weighted	5.08099	9	0.827191	0.0241944	0.0406915	0.568554
KIRC	eqtl-a-ENSG00000143248	RGS5	Inverse variance weighted	4.36181	19	0.999794	-0.0579292	0.0324786	0.0913566
KIRC	eqtl-a-ENSG00000143297	FCRL5	Inverse variance weighted	82.9167	116	0.991265	-0.0143422	0.00829435	0.0864651
KIRC	eqtl-a-ENSG00000143382	ADAMTSL4	Inverse variance weighted	110.807	96	0.143283	-0.039419	0.0105847	0.000332347
KIRC	eqtl-a-ENSG00000144152	FBLN7	Inverse variance weighted	101.113	108	0.667604	0.0540942	0.0110838	3.71434e-06
KIRC	eqtl-a-ENSG00000144847	IGSF11	Inverse variance weighted	19.3165	41	0.998417	0.0361555	0.0261755	0.174863
KIRC	eqtl-a-ENSG00000145386	CCNA2	Inverse variance weighted	1.62843	15	0.999993	-0.011493	0.0453406	0.803581
KIRC	eqtl-a-ENSG00000145649	GZMA	Inverse variance weighted	130.248	93	0.00655161	-0.0479126	0.0136578	0.000700361
KIRC	eqtl-a-ENSG00000147872	PLIN2	Inverse variance weighted	61.3254	82	0.957385	0.0117436	0.00938267	0.214307
KIRC	eqtl-a-ENSG00000148204	CRB2	Inverse variance weighted	17.4107	11	0.0963007	0.0091296	0.0652558	0.891513
KIRC	eqtl-a-ENSG00000148926	ADM	Inverse variance weighted	41.9168	40	0.387704	-0.0575977	0.010774	4.18245e-06
KIRC	eqtl-a-ENSG00000149575	SCN2B	Inverse variance weighted	14.892	28	0.979552	-0.0388107	0.032389	0.241225
KIRC	eqtl-a-ENSG00000150337	FCGR1A	Inverse variance weighted	40.0939	75	0.999683	0.0346769	0.0128748	0.00874468
KIRC	eqtl-a-ENSG00000151062	CACNA2D4	Inverse variance weighted	10.3729	12	0.583284	0.0757585	0.0688573	0.294728
KIRC	eqtl-a-ENSG00000153283	CD96	Inverse variance weighted	92.1466	131	0.995944	-0.0202372	0.01086	0.0646522
KIRC	eqtl-a-ENSG00000153563	CD8A	Inverse variance weighted	90.8473	95	0.601491	-0.0266454	0.0097306	0.00738747
KIRC	eqtl-a-ENSG00000154269	ENPP3	Inverse variance weighted	27.693	26	0.373728	0.0334648	0.0163451	0.0512651
KIRC	eqtl-a-ENSG00000154764	WNT7A	Inverse variance weighted	36.3346	19	0.00959986	0.0299217	0.0406891	0.471585
KIRC	eqtl-a-ENSG00000157873	TNFRSF14	Inverse variance weighted	15.4327	33	0.996028	0.0380373	0.0146309	0.0139975
KIRC	eqtl-a-ENSG00000158473	CD1D	Inverse variance weighted	47.3501	52	0.657033	-0.0751202	0.0240255	0.00291804
KIRC	eqtl-a-ENSG00000158477	CD1A	Inverse variance weighted	54.7315	85	0.995616	-0.00329101	0.00841749	0.696807
KIRC	eqtl-a-ENSG00000158517	NCF1	Inverse variance weighted	26.9025	55	0.99949	0.00675386	0.0125535	0.592783
KIRC	eqtl-a-ENSG00000158865	SLC5A11	Inverse variance weighted	35.2276	41	0.724244	-0.0281709	0.0171684	0.108669
KIRC	eqtl-a-ENSG00000158869	FCER1G	Inverse variance weighted	140.854	86	0.000176258	0.0231546	0.0141057	0.104388
KIRC	eqtl-a-ENSG00000159423	ALDH4A1	Inverse variance weighted	76.3099	19	7.97387e-09	-0.0905368	0.0331941	0.0138195
KIRC	eqtl-a-ENSG00000160856	FCRL3	Inverse variance weighted	183.79	131	0.00161961	-0.0223445	0.00798588	0.00592459
KIRC	eqtl-a-ENSG00000160963	COL26A1	Inverse variance weighted	51.7006	55	0.601476	0.0159041	0.0121896	0.197519
KIRC	eqtl-a-ENSG00000161638	ITGA5	Inverse variance weighted	20.7252	32	0.937505	0.018715	0.0237464	0.436612
KIRC	eqtl-a-ENSG00000162383	SLC1A7	Inverse variance weighted	51.4948	75	0.982607	0.000609942	0.0155125	0.968742
KIRC	eqtl-a-ENSG00000162572	SCNN1D	Inverse variance weighted	12.6407	22	0.9427	0.110681	0.0418295	0.0151092
KIRC	eqtl-a-ENSG00000162631	NTNG1	Inverse variance weighted	27.265	56	0.999574	0.00636487	0.0161	0.694125
KIRC	eqtl-a-ENSG00000163083	INHBB	Inverse variance weighted	63.5188	70	0.694558	0.0154824	0.0134023	0.25199
KIRC	eqtl-a-ENSG00000163406	SLC15A2	Inverse variance weighted	15.9752	60	1	0.0117375	0.0218364	0.592932
KIRC	eqtl-a-ENSG00000163545	NUAK2	Inverse variance weighted	68.6879	60	0.20669	-0.0369664	0.0173895	0.0377167
KIRC	eqtl-a-ENSG00000163599	CTLA4	Inverse variance weighted	97.2263	51	0.000102892	0.0590371	0.0182046	0.00210971
KIRC	eqtl-a-ENSG00000163606	CD200R1	Inverse variance weighted	113.798	93	0.070479	0.0484709	0.0142376	0.000983918
KIRC	eqtl-a-ENSG00000163687	DNASE1L3	Inverse variance weighted	36.8075	87	1	0.0161852	0.0121502	0.186349
KIRC	eqtl-a-ENSG00000163735	CXCL5	Inverse variance weighted	87.4129	170	1	0.00290983	0.00623014	0.641061
KIRC	eqtl-a-ENSG00000163873	GRIK3	Inverse variance weighted	6.93963	14	0.937014	-0.02895	0.0807905	0.725845
KIRC	eqtl-a-ENSG00000163898	LIPH	Inverse variance weighted	15.4548	23	0.877595	0.0571635	0.0261584	0.0398028
KIRC	eqtl-a-ENSG00000164483	SAMD3	Inverse variance weighted	106.342	84	0.0503607	0.0486454	0.0160944	0.0033335
KIRC	eqtl-a-ENSG00000164530	PI16	Inverse variance weighted	138.194	114	0.061217	0.0167923	0.00979153	0.0890889
KIRC	eqtl-a-ENSG00000165061	ZMAT4	Inverse variance weighted	51.6082	45	0.231278	0.00184	0.0116136	0.874839
KIRC	eqtl-a-ENSG00000165140	FBP1	Inverse variance weighted	77.5562	118	0.998503	0.0221774	0.0100514	0.0293096
KIRC	eqtl-a-ENSG00000165272	AQP3	Inverse variance weighted	35.2059	52	0.964076	0.0395386	0.0183524	0.0359543
KIRC	eqtl-a-ENSG00000165409	TSHR	Inverse variance weighted	15.0443	45	0.999992	-0.00391864	0.0193767	0.840666
KIRC	eqtl-a-ENSG00000166278	C2	Inverse variance weighted	206.587	101	3.02538e-09	-0.116946	0.0225303	1.10286e-06
KIRC	eqtl-a-ENSG00000166803	PCLAF	Inverse variance weighted	12.3698	73	1	0.0364445	0.0326253	0.267682
KIRC	eqtl-a-ENSG00000166851	PLK1	Inverse variance weighted	8.82306	28	0.999793	0.0525587	0.0283482	0.0746883
KIRC	eqtl-a-ENSG00000168209	DDIT4	Inverse variance weighted	44.7341	59	0.915339	0.0756165	0.0255007	0.00438426
KIRC	eqtl-a-ENSG00000169860	P2RY1	Inverse variance weighted	2.07758	4	0.721492	0.0644454	0.0946697	0.544869
KIRC	eqtl-a-ENSG00000169896	ITGAM	Inverse variance weighted	104.553	66	0.00176383	-0.0383353	0.0139342	0.00768524
KIRC	eqtl-a-ENSG00000170190	SLC16A5	Inverse variance weighted	70.8661	55	0.0735339	0.0232491	0.0177738	0.196397
KIRC	eqtl-a-ENSG00000171208	NETO2	Inverse variance weighted	7.21837	24	0.999621	0.0191808	0.0320208	0.55502
KIRC	eqtl-a-ENSG00000172215	CXCR6	Inverse variance weighted	173.535	126	0.0032189	-0.0430754	0.00855081	1.60884e-06
KIRC	eqtl-a-ENSG00000172322	CLEC12A	Inverse variance weighted	243.786	201	0.0210948	-0.0271673	0.00737215	0.000294308
KIRC	eqtl-a-ENSG00000172543	CTSW	Inverse variance weighted	201.755	221	0.818973	0.00269359	0.00647848	0.67798
KIRC	eqtl-a-ENSG00000172824	CES4A	Inverse variance weighted	4.84182	29	1	0.0151618	0.0351037	0.669111
KIRC	eqtl-a-ENSG00000174564	IL20RB	Inverse variance weighted	18.7441	48	0.999954	-0.116469	0.0668774	0.0881339
KIRC	eqtl-a-ENSG00000175206	NPPA	Inverse variance weighted	9.64856	19	0.961089	-0.0382985	0.0453095	0.409059
KIRC	eqtl-a-ENSG00000177807	KCNJ10	Inverse variance weighted	18.3071	12	0.10668	0.00468072	0.0428766	0.915036
KIRC	eqtl-a-ENSG00000178445	GLDC	Inverse variance weighted	29.4503	45	0.964525	-0.00811385	0.015711	0.608131
KIRC	eqtl-a-ENSG00000178999	AURKB	Inverse variance weighted	3.29651	15	0.999282	0.0343561	0.0378763	0.379723
KIRC	eqtl-a-ENSG00000179344	HLA-DQB1	Inverse variance weighted	253.356	200	0.00630808	0.0384468	0.0120763	0.00168793
KIRC	eqtl-a-ENSG00000179593	ALOX15B	Inverse variance weighted	14.5947	27	0.974741	0.0225697	0.0162777	0.177357
KIRC	eqtl-a-ENSG00000179869	ABCA13	Inverse variance weighted	100.518	46	6.13989e-06	-0.0735585	0.0389161	0.0651847
KIRC	eqtl-a-ENSG00000179934	CCR8	Inverse variance weighted	12.9086	21	0.911792	-0.0425241	0.0404435	0.305594
KIRC	eqtl-a-ENSG00000180644	PRF1	Inverse variance weighted	41.3666	35	0.212487	-0.0139632	0.0151603	0.363519
KIRC	eqtl-a-ENSG00000184574	LPAR5	Inverse variance weighted	48.9775	50	0.514403	0.00255574	0.0128549	0.843231
KIRC	eqtl-a-ENSG00000186074	CD300LF	Inverse variance weighted	36.9797	53	0.95366	0.0166626	0.00931215	0.0793841
KIRC	eqtl-a-ENSG00000186470	BTN3A2	Inverse variance weighted	231.818	255	0.848412	-0.0181073	0.00645917	0.00544782
KIRC	eqtl-a-ENSG00000186529	CYP4F3	Inverse variance weighted	88.7507	86	0.398098	-0.00763581	0.00892538	0.39467
KIRC	eqtl-a-ENSG00000186827	TNFRSF4	Inverse variance weighted	120.732	43	2.63028e-09	0.0376157	0.0183015	0.0460999
KIRC	eqtl-a-ENSG00000186891	TNFRSF18	Inverse variance weighted	37.1586	29	0.14221	0.0885728	0.0200913	0.000139362
KIRC	eqtl-a-ENSG00000187037	GPR141	Inverse variance weighted	26.7246	50	0.99717	-0.0164545	0.0172256	0.344147
KIRC	eqtl-a-ENSG00000187730	GABRD	Inverse variance weighted	11.6298	20	0.92823	-0.0639044	0.0232125	0.012652
KIRC	eqtl-a-ENSG00000188389	PDCD1	Inverse variance weighted	41.2686	47	0.707979	-0.0308929	0.0178807	0.0907465
KIRC	eqtl-a-ENSG00000189430	NCR1	Inverse variance weighted	13.7037	9	0.133261	0.0693168	0.0461723	0.171684
KIRC	eqtl-a-ENSG00000196177	ACADSB	Inverse variance weighted	22.8955	20	0.293957	-0.161545	0.0543427	0.00781972
KIRC	eqtl-a-ENSG00000196188	CTSE	Inverse variance weighted	20.1968	17	0.264285	0.0138036	0.038393	0.723898
KIRC	eqtl-a-ENSG00000196735	HLA-DQA1	Inverse variance weighted	154.138	181	0.926876	-0.0156998	0.011437	0.171549
KIRC	eqtl-a-ENSG00000197272	IL27	Inverse variance weighted	9.10983	29	0.999844	0.000988297	0.0322504	0.97577
KIRC	eqtl-a-ENSG00000197471	SPN	Inverse variance weighted	0.980583	9	0.999481	-0.00964877	0.0507328	0.853899
KIRC	eqtl-a-ENSG00000197540	GZMM	Inverse variance weighted	12.8357	12	0.381098	0.0246411	0.0421261	0.570394
KIRC	eqtl-a-ENSG00000197696	NMB	Inverse variance weighted	24.0705	83	1	0.031543	0.0152172	0.0413266
KIRC	eqtl-a-ENSG00000197822	OCLN	Inverse variance weighted	23.0761	33	0.900932	0.0717568	0.0298904	0.0223523
KIRC	eqtl-a-ENSG00000198417	MT1F	Inverse variance weighted	163.75	145	0.136624	-0.0345178	0.00837753	6.35709e-05
KIRC	eqtl-a-ENSG00000198515	CNGA1	Inverse variance weighted	37.9681	53	0.940641	0.0605234	0.016439	0.00055163
KIRC	eqtl-a-ENSG00000198851	CD3E	Inverse variance weighted	22.5129	21	0.370489	-0.00290737	0.0264232	0.913482
KIRC	eqtl-a-ENSG00000204262	COL5A2	Inverse variance weighted	62.772	75	0.842131	-0.031583	0.0149509	0.038023
KIRC	eqtl-a-ENSG00000204305	AGER	Inverse variance weighted	109.015	136	0.957087	-0.00352726	0.0181688	0.84636
KIRC	eqtl-a-ENSG00000204410	MSH5	Inverse variance weighted	84.0958	62	0.032426	-0.035556	0.0274969	0.200856
KIRC	eqtl-a-ENSG00000204482	LST1	Inverse variance weighted	108.775	185	0.999998	0.00929841	0.0127078	0.465278
KIRC	eqtl-a-ENSG00000204632	HLA-G	Inverse variance weighted	208.264	308	0.999997	-0.0346834	0.0131665	0.00886055
KIRC	eqtl-a-ENSG00000205560	CPT1B	Inverse variance weighted	32.796	31	0.378955	-0.0090027	0.0194981	0.647612
KIRC	eqtl-a-ENSG00000213199	ASIC3	Inverse variance weighted	4.63045	9	0.86526	0.0901452	0.0564036	0.148662
KIRC	eqtl-a-ENSG00000213809	KLRK1	Inverse variance weighted	3.35794	19	0.999973	-0.0161697	0.0254055	0.532485
KIRC	eqtl-a-ENSG00000213918	DNASE1	Inverse variance weighted	13.1035	24	0.964383	0.00720781	0.0322023	0.824866
KIRC	eqtl-a-ENSG00000226979	LTA	Inverse variance weighted	179.283	102	3.57779e-06	0.0246328	0.0204096	0.230281
KIRC	eqtl-a-ENSG00000231852	CYP21A2	Inverse variance weighted	94.5705	147	0.999752	-0.0206805	0.0100205	0.0408055
KIRC	eqtl-a-ENSG00000237541	HLA-DQA2	Inverse variance weighted	155.849	139	0.155772	-0.0149532	0.0127184	0.241735
KIRC	eqtl-a-ENSG00000239713	APOBEC3G	Inverse variance weighted	37.6886	40	0.574794	-0.0279419	0.0110279	0.015415
KIRC	eqtl-a-ENSG00000241106	HLA-DOB	Inverse variance weighted	120.728	162	0.993523	0.00287912	0.0072364	0.691255
KIRC	eqtl-a-ENSG00000242252	BGLAP	Inverse variance weighted	1.11402	8	0.99742	-0.0961437	0.0946711	0.34365
KIRC	eqtl-a-ENSG00000244482	LILRA6	Inverse variance weighted	5.1743	18	0.998562	0.0068631	0.0240881	0.77915
KIRC	eqtl-a-ENSG00000250506	CDK3	Inverse variance weighted	1.41292	9	0.997743	0.0770395	0.0983602	0.456046
KIRC	eqtl-a-ENSG00000254521	SIGLEC12	Inverse variance weighted	20.1459	24	0.688449	0.013119	0.0209793	0.537911
