# Supplementary material
Source: Research Square preprint supplement (doi:10.21203/rs.3.rs-9651090/v1)
Supplement: Supplementary file 8 [file d84fc230f11ab4a5db2d48d5.xlsx]

## Sheet: GO
Supplementary Table 6. GO and KEGG enrichment analyses of the 129 druggable genes causally associated with KIRC
ONTOLOGY	ID	Description	GeneRatio	BgRatio	pvalue	p.adjust	qvalue	geneID	Count
BP	GO:0002697	regulation of immune effector process	17/125	389/18870	8.12895e-10	2.10784e-06	1.74986e-06	8832/201294/3594/942/941/51744/10225/5169/909/1776/53833/9437/246778/6693/22914/1773/4049	17
BP	GO:0002703	regulation of leukocyte mediated immunity	13/125	249/18870	1.11144e-08	1.44099e-05	1.19627e-05	8832/201294/3594/941/10225/909/1776/53833/9437/6693/22914/1773/4049	13
BP	GO:0070663	regulation of leukocyte proliferation	13/125	267/18870	2.54681e-08	1.83992e-05	1.52744e-05	3604/6480/1725/3594/942/941/3620/3559/5169/53833/246778/6693/916	13
BP	GO:0001909	leukocyte mediated cytotoxicity	10/125	140/18870	3.13885e-08	1.83992e-05	1.52744e-05	201294/3594/3002/909/1776/5551/9437/3004/22914/1773	10
BP	GO:0042129	regulation of T cell proliferation	11/125	182/18870	3.54785e-08	1.83992e-05	1.52744e-05	3604/1725/3594/942/941/3620/3559/53833/246778/6693/916	11
BP	GO:0032944	regulation of mononuclear cell proliferation	12/125	242/18870	7.3902e-08	2.89413e-05	2.40262e-05	3604/6480/1725/3594/942/941/3620/3559/53833/246778/6693/916	12
BP	GO:0002443	leukocyte mediated immunity	16/125	466/18870	7.81292e-08	2.89413e-05	2.40262e-05	8832/201294/3594/3002/941/10225/909/1776/53833/5551/9437/6693/3004/22914/1773/4049	16
BP	GO:0002695	negative regulation of leukocyte activation	11/125	202/18870	1.03089e-07	3.34138e-05	2.77391e-05	8832/8530/6422/942/941/3620/3559/5169/53833/146722/6693	11
BP	GO:0045785	positive regulation of cell adhesion	16/125	482/18870	1.23818e-07	3.56735e-05	2.96151e-05	51206/55423/201294/1725/3594/6422/921/7422/942/941/3559/136227/3678/6693/916/22914	16
BP	GO:0042098	T cell proliferation	11/125	213/18870	1.76306e-07	4.57161e-05	3.79522e-05	3604/1725/3594/942/941/3620/3559/53833/246778/6693/916	11
BP	GO:0050863	regulation of T cell activation	14/125	381/18870	2.37465e-07	5.57619e-05	4.62919e-05	3604/55423/1725/3594/921/942/941/3620/3559/53833/246778/6693/916/22914	14
BP	GO:0001906	cell killing	11/125	223/18870	2.79562e-07	5.57619e-05	4.62919e-05	201294/3594/3002/10578/909/1776/5551/9437/3004/22914/1773	11
BP	GO:0050866	negative regulation of cell activation	11/125	223/18870	2.79562e-07	5.57619e-05	4.62919e-05	8832/8530/6422/942/941/3620/3559/5169/53833/146722/6693	11
BP	GO:0050670	regulation of lymphocyte proliferation	11/125	238/18870	5.34799e-07	9.90524e-05	8.22304e-05	3604/1725/3594/942/941/3620/3559/53833/246778/6693/916	11
BP	GO:0070661	leukocyte proliferation	13/125	350/18870	5.81823e-07	0.000100578	8.34967e-05	3604/6480/1725/3594/942/941/3620/3559/5169/53833/246778/6693/916	13
BP	GO:0031295	T cell costimulation	6/125	48/18870	7.31846e-07	0.00011349	9.42157e-05	921/942/941/6693/916/22914	6
BP	GO:0007159	leukocyte cell-cell adhesion	14/125	419/18870	7.4405e-07	0.00011349	9.42157e-05	55423/1725/3594/921/6404/942/941/3620/3559/3678/53833/6693/916/22914	14
BP	GO:0031294	lymphocyte costimulation	6/125	50/18870	9.37495e-07	0.000135051	0.000112116	921/942/941/6693/916/22914	6
BP	GO:0002449	lymphocyte mediated immunity	13/125	368/18870	1.02162e-06	0.000135622	0.000112589	201294/3594/3002/941/10225/909/53833/5551/9437/6693/3004/22914/4049	13
BP	GO:0001819	positive regulation of cytokine production	15/125	499/18870	1.10257e-06	0.000135622	0.000112589	8832/3594/3162/3702/942/941/51744/3620/53833/247/246778/6693/916/22914/4049	15
BP	GO:0006968	cellular defense response	6/125	52/18870	1.18817e-06	0.000135622	0.000112589	3702/10578/4283/5551/9437/6693	6
BP	GO:0032943	mononuclear cell proliferation	12/125	314/18870	1.2022e-06	0.000135622	0.000112589	3604/6480/1725/3594/942/941/3620/3559/53833/246778/6693/916	12
BP	GO:0032609	type II interferon production	8/125	119/18870	1.25527e-06	0.000135622	0.000112589	3594/51744/10225/53833/246778/916/22914/4049	8
BP	GO:0032649	regulation of type II interferon production	8/125	119/18870	1.25527e-06	0.000135622	0.000112589	3594/51744/10225/53833/246778/916/22914/4049	8
BP	GO:0046631	alpha-beta T cell activation	9/125	181/18870	3.31454e-06	0.000343784	0.0002854	3594/3702/942/941/2841/3559/246778/6693/916	9
BP	GO:0070664	negative regulation of leukocyte proliferation	7/125	96/18870	3.45693e-06	0.000344763	0.000286212	942/941/3620/3559/5169/53833/6693	7
BP	GO:0002706	regulation of lymphocyte mediated immunity	9/125	188/18870	4.52086e-06	0.00043417	0.000360435	3594/941/10225/909/53833/9437/6693/22914/4049	9
BP	GO:0022407	regulation of cell-cell adhesion	14/125	493/18870	4.96863e-06	0.000460131	0.000381987	51206/55423/1725/3594/921/7422/942/941/3620/3559/53833/6693/916/22914	14
BP	GO:0002366	leukocyte activation involved in immune response	11/125	301/18870	5.2411e-06	0.000468627	0.00038904	8832/201294/3594/942/941/51744/5169/1776/246778/6693/1773	11
BP	GO:0002263	cell activation involved in immune response	11/125	305/18870	5.94141e-06	0.000504843	0.000419106	8832/201294/3594/942/941/51744/5169/1776/246778/6693/1773	11
BP	GO:0042102	positive regulation of T cell proliferation	7/125	105/18870	6.28445e-06	0.000504843	0.000419106	1725/3594/942/941/3559/6693/916	7
BP	GO:0046651	lymphocyte proliferation	11/125	307/18870	6.32126e-06	0.000504843	0.000419106	3604/1725/3594/942/941/3620/3559/53833/246778/6693/916	11
BP	GO:0032946	positive regulation of mononuclear cell proliferation	8/125	148/18870	6.42493e-06	0.000504843	0.000419106	6480/1725/3594/942/941/3559/6693/916	8
BP	GO:0050870	positive regulation of T cell activation	10/125	251/18870	6.73567e-06	0.000513694	0.000426453	55423/1725/3594/921/942/941/3559/6693/916/22914	10
BP	GO:0042130	negative regulation of T cell proliferation	6/125	72/18870	8.18489e-06	0.000589851	0.000489677	942/941/3620/3559/53833/6693	6
BP	GO:0002643	regulation of tolerance induction	4/125	20/18870	8.18921e-06	0.000589851	0.000489677	3620/3559/5133/916	4
BP	GO:1903037	regulation of leukocyte cell-cell adhesion	12/125	382/18870	8.99078e-06	0.000619266	0.000514096	55423/1725/3594/921/942/941/3620/3559/53833/6693/916/22914	12
BP	GO:0031341	regulation of cell killing	7/125	111/18870	9.07525e-06	0.000619266	0.000514096	3594/909/1776/5551/9437/22914/1773	7
BP	GO:0022409	positive regulation of cell-cell adhesion	11/125	322/18870	9.91197e-06	0.000659019	0.000547098	51206/55423/1725/3594/921/942/941/3559/6693/916/22914	11
BP	GO:0032729	positive regulation of type II interferon production	6/125	77/18870	1.20901e-05	0.000783738	0.000650636	3594/51744/246778/916/22914/4049	6
BP	GO:0002699	positive regulation of immune effector process	10/125	270/18870	1.27372e-05	0.000804268	0.00066768	8832/201294/3594/942/941/51744/5169/909/22914/4049	10
BP	GO:2000514	regulation of CD4-positive, alpha-beta T cell activation	6/125	78/18870	1.30271e-05	0.000804268	0.00066768	3594/942/941/3559/246778/916	6
BP	GO:0035710	CD4-positive, alpha-beta T cell activation	7/125	119/18870	1.43282e-05	0.000860289	0.000714186	3594/942/941/3559/246778/6693/916	7
BP	GO:0070665	positive regulation of leukocyte proliferation	8/125	166/18870	1.48867e-05	0.000860289	0.000714186	6480/1725/3594/942/941/3559/6693/916	8
BP	GO:1903039	positive regulation of leukocyte cell-cell adhesion	10/125	275/18870	1.49298e-05	0.000860289	0.000714186	55423/1725/3594/921/942/941/3559/6693/916/22914	10
BP	GO:0010810	regulation of cell-substrate adhesion	9/125	220/18870	1.60369e-05	0.000903995	0.00075047	6480/285/201294/6422/7422/5328/136227/3678/916	9
BP	GO:0046632	alpha-beta T cell differentiation	7/125	124/18870	1.87355e-05	0.00103364	0.000858097	3594/3702/942/941/2841/246778/6693	7
BP	GO:0002456	T cell mediated immunity	7/125	129/18870	2.4207e-05	0.00130768	0.0010856	3594/941/909/53833/5551/6693/3004	7
BP	GO:0031589	cell-substrate adhesion	11/125	356/18870	2.51644e-05	0.00133166	0.0011055	6480/285/201294/6422/7450/7422/5328/10225/136227/3678/916	11
BP	GO:0050672	negative regulation of lymphocyte proliferation	6/125	88/18870	2.60432e-05	0.0013506	0.00112123	942/941/3620/3559/53833/6693	6
BP	GO:0032945	negative regulation of mononuclear cell proliferation	6/125	89/18870	2.77757e-05	0.0014122	0.00117237	942/941/3620/3559/53833/6693	6
BP	GO:0030217	T cell differentiation	10/125	307/18870	3.82416e-05	0.00190693	0.00158308	3604/3594/3702/942/941/2841/3559/246778/6693/916	10
BP	GO:0001910	regulation of leukocyte mediated cytotoxicity	6/125	96/18870	4.2671e-05	0.00208766	0.00173311	3594/909/1776/9437/22914/1773	6
BP	GO:0002507	tolerance induction	4/125	30/18870	4.40065e-05	0.00211313	0.00175426	3620/3559/5133/916	4
BP	GO:0050671	positive regulation of lymphocyte proliferation	7/125	145/18870	5.12319e-05	0.00241535	0.00200515	1725/3594/942/941/3559/6693/916	7
BP	GO:0006935	chemotaxis	12/125	468/18870	6.57741e-05	0.00304557	0.00252835	1890/6480/285/80270/7422/5328/2841/347733/4283/1237/6693/22914	12
BP	GO:0050777	negative regulation of immune response	8/125	205/18870	6.71619e-05	0.00305528	0.0025364	8832/941/10225/5169/53833/9212/5133/6693	8
BP	GO:0042330	taxis	12/125	470/18870	6.85026e-05	0.00306254	0.00254243	1890/6480/285/80270/7422/5328/2841/347733/4283/1237/6693/22914	12
BP	GO:0051251	positive regulation of lymphocyte activation	10/125	330/18870	7.00469e-05	0.0030785	0.00255568	55423/1725/3594/921/942/941/3559/6693/916/22914	10
BP	GO:0002664	regulation of T cell tolerance induction	3/125	13/18870	7.73161e-05	0.00328657	0.00272841	3620/3559/916	3
BP	GO:0033004	negative regulation of mast cell activation	3/125	13/18870	7.73161e-05	0.00328657	0.00272841	8832/5169/146722	3
BP	GO:0032102	negative regulation of response to external stimulus	12/125	481/18870	8.53273e-05	0.00351196	0.00291553	6480/8530/285/5328/2841/3559/10225/5169/53833/9212/6693/22914	12
BP	GO:1903131	mononuclear cell differentiation	12/125	481/18870	8.53273e-05	0.00351196	0.00291553	3604/3594/6422/7422/3702/942/941/2841/3559/246778/6693/916	12
BP	GO:0002704	negative regulation of leukocyte mediated immunity	5/125	69/18870	9.42436e-05	0.00381834	0.00316987	8832/941/10225/53833/6693	5
BP	GO:0002517	T cell tolerance induction	3/125	15/18870	0.000121816	0.00477294	0.00396235	3620/3559/916	3
BP	GO:0046634	regulation of alpha-beta T cell activation	6/125	116/18870	0.00012264	0.00477294	0.00396235	3594/942/941/3559/246778/916	6
BP	GO:0042093	T-helper cell differentiation	5/125	73/18870	0.000123327	0.00477294	0.00396235	3594/942/941/246778/6693	5
BP	GO:0030098	lymphocyte differentiation	11/125	429/18870	0.000134021	0.00504101	0.00418489	3604/3594/6422/3702/942/941/2841/3559/246778/6693/916	11
BP	GO:0051250	negative regulation of lymphocyte activation	7/125	169/18870	0.000134142	0.00504101	0.00418489	6422/942/941/3620/3559/53833/6693	7
BP	GO:0002294	CD4-positive, alpha-beta T cell differentiation involved in immune response	5/125	75/18870	0.000140224	0.00519431	0.00431216	3594/942/941/246778/6693	5
BP	GO:0002287	alpha-beta T cell activation involved in immune response	5/125	76/18870	0.00014931	0.00537724	0.00446402	3594/942/941/246778/6693	5
BP	GO:0002293	alpha-beta T cell differentiation involved in immune response	5/125	76/18870	0.00014931	0.00537724	0.00446402	3594/942/941/246778/6693	5
BP	GO:0071887	leukocyte apoptotic process	6/125	121/18870	0.000154638	0.00549284	0.00455999	6480/79444/3620/3559/9212/5133	6
BP	GO:0010811	positive regulation of cell-substrate adhesion	6/125	123/18870	0.000169149	0.00592708	0.00492049	201294/6422/7422/136227/3678/916	6
BP	GO:0002228	natural killer cell mediated immunity	5/125	79/18870	0.000179286	0.00608602	0.00505243	201294/3002/10225/9437/22914	5
BP	GO:0001956	positive regulation of neurotransmitter secretion	3/125	17/18870	0.0001803	0.00608602	0.00505243	9498/6857/632	3
BP	GO:0002698	negative regulation of immune effector process	6/125	125/18870	0.000184716	0.00608602	0.00505243	8832/941/10225/5169/53833/6693	6
BP	GO:0033003	regulation of mast cell activation	4/125	43/18870	0.000185421	0.00608602	0.00505243	8832/201294/5169/146722	4
BP	GO:0045622	regulation of T-helper cell differentiation	4/125	43/18870	0.000185421	0.00608602	0.00505243	3594/942/941/246778	4
BP	GO:1903305	regulation of regulated secretory pathway	6/125	127/18870	0.000201394	0.00641683	0.00532706	9498/8832/6857/201294/7476/5028	6
BP	GO:2000300	regulation of synaptic vesicle exocytosis	4/125	44/18870	0.000202923	0.00641683	0.00532706	9498/6857/7476/5028	4
BP	GO:2000516	positive regulation of CD4-positive, alpha-beta T cell activation	4/125	44/18870	0.000202923	0.00641683	0.00532706	3594/942/941/916	4
BP	GO:0046928	regulation of neurotransmitter secretion	5/125	82/18870	0.000213651	0.00651872	0.00541165	9498/6857/7476/5028/632	5
BP	GO:0070227	lymphocyte apoptotic process	5/125	82/18870	0.000213651	0.00651872	0.00541165	79444/3620/3559/9212/5133	5
BP	GO:0015850	organic hydroxy compound transport	9/125	308/18870	0.000213687	0.00651872	0.00541165	5244/4481/6857/949/1950/115584/5028/154664/9311	9
BP	GO:0002460	adaptive immune response based on somatic recombination of immune receptors built from immunoglobulin superfamily domains	10/125	380/18870	0.00022161	0.00660499	0.00548327	201294/3594/941/909/53833/5551/246778/6693/3004/4049	10
BP	GO:0002696	positive regulation of leukocyte activation	10/125	380/18870	0.00022161	0.00660499	0.00548327	55423/1725/3594/921/942/941/3559/6693/916/22914	10
BP	GO:0002292	T cell differentiation involved in immune response	5/125	84/18870	0.000239202	0.00704831	0.0058513	3594/942/941/246778/6693	5
BP	GO:0002544	chronic inflammatory response	3/125	19/18870	0.000254451	0.00737023	0.00611854	201294/3620/4049	3
BP	GO:0001505	regulation of neurotransmitter levels	7/125	188/18870	0.000258312	0.00737023	0.00611854	9498/6857/7476/6512/5028/3766/632	7
BP	GO:0050868	negative regulation of T cell activation	6/125	133/18870	0.000258654	0.00737023	0.00611854	942/941/3620/3559/53833/6693	6
BP	GO:0042088	T-helper 1 type immune response	4/125	48/18870	0.000284981	0.00803214	0.00666804	3594/941/246778/6693	4
BP	GO:0002822	regulation of adaptive immune response based on somatic recombination of immune receptors built from immunoglobulin superfamily domains	7/125	193/18870	0.000302983	0.0084268	0.00699568	3594/941/909/53833/246778/6693/4049	7
BP	GO:0050867	positive regulation of cell activation	10/125	396/18870	0.000307823	0.0084268	0.00699568	55423/1725/3594/921/942/941/3559/6693/916/22914	10
BP	GO:0002673	regulation of acute inflammatory response	4/125	49/18870	0.000308733	0.0084268	0.00699568	1776/53833/6693/1773	4
BP	GO:0043367	CD4-positive, alpha-beta T cell differentiation	5/125	93/18870	0.00038405	0.0102664	0.00852288	3594/942/941/246778/6693	5
BP	GO:2000106	regulation of leukocyte apoptotic process	5/125	93/18870	0.00038405	0.0102664	0.00852288	6480/79444/3620/9212/5133	5
BP	GO:0045624	positive regulation of T-helper cell differentiation	3/125	22/18870	0.000398564	0.0105457	0.00875472	3594/942/941	3
BP	GO:0022408	negative regulation of cell-cell adhesion	7/125	205/18870	0.000435809	0.0114147	0.00947612	7422/942/941/3620/3559/53833/6693	7
BP	GO:0045063	T-helper 1 cell differentiation	3/125	23/18870	0.000456138	0.0117106	0.00972176	941/246778/6693	3
BP	GO:0051590	positive regulation of neurotransmitter transport	3/125	23/18870	0.000456138	0.0117106	0.00972176	9498/6857/632	3
BP	GO:0006836	neurotransmitter transport	7/125	207/18870	0.000461882	0.0117418	0.00974767	9498/6857/7476/6512/5028/3766/632	7
BP	GO:0002819	regulation of adaptive immune response	7/125	208/18870	0.000475378	0.0119675	0.00993509	3594/941/909/53833/246778/6693/4049	7
BP	GO:0002275	myeloid cell activation involved in immune response	5/125	98/18870	0.000488814	0.0121874	0.0101177	8832/201294/5169/1776/1773	5
BP	GO:0002709	regulation of T cell mediated immunity	5/125	99/18870	0.000512115	0.0125148	0.0103894	3594/941/909/53833/6693	5
BP	GO:0051588	regulation of neurotransmitter transport	5/125	99/18870	0.000512115	0.0125148	0.0103894	9498/6857/7476/5028/632	5
BP	GO:0043370	regulation of CD4-positive, alpha-beta T cell differentiation	4/125	56/18870	0.000516424	0.0125148	0.0103894	3594/942/941/246778	4
BP	GO:0032496	response to lipopolysaccharide	9/125	348/18870	0.000521332	0.0125168	0.0103911	7431/949/942/941/3620/4283/10225/22914/4049	9
BP	GO:1903038	negative regulation of leukocyte cell-cell adhesion	6/125	152/18870	0.000528064	0.0125621	0.0104287	942/941/3620/3559/53833/6693	6
BP	GO:0002285	lymphocyte activation involved in immune response	7/125	213/18870	0.000547659	0.0129098	0.0107173	201294/3594/942/941/51744/246778/6693	7
BP	GO:0008585	female gonad development	5/125	101/18870	0.000561214	0.0131102	0.0108837	5798/6422/268/7422/3625	5
BP	GO:0045807	positive regulation of endocytosis	6/125	155/18870	0.00058544	0.0134311	0.0111501	55423/7018/7422/1950/154664/146722	6
BP	GO:0046629	gamma-delta T cell activation	3/125	25/18870	0.000586689	0.0134311	0.0111501	3702/2841/916	3
BP	GO:0002707	negative regulation of lymphocyte mediated immunity	4/125	58/18870	0.000590491	0.0134311	0.0111501	941/10225/53833/6693	4
BP	GO:0002886	regulation of myeloid leukocyte mediated immunity	4/125	59/18870	0.000630217	0.0140875	0.011695	8832/201294/1776/1773	4
BP	GO:2000107	negative regulation of leukocyte apoptotic process	4/125	59/18870	0.000630217	0.0140875	0.011695	6480/3620/9212/5133	4
BP	GO:0046545	development of primary female sexual characteristics	5/125	105/18870	0.000669927	0.0146385	0.0121524	5798/6422/268/7422/3625	5
BP	GO:0001913	T cell mediated cytotoxicity	4/125	60/18870	0.000671801	0.0146385	0.0121524	3594/909/5551/3004	4
BP	GO:0070228	regulation of lymphocyte apoptotic process	4/125	60/18870	0.000671801	0.0146385	0.0121524	79444/3620/9212/5133	4
BP	GO:0010884	positive regulation of lipid storage	3/125	27/18870	0.000738943	0.0158354	0.013146	4481/949/123	3
BP	GO:0032753	positive regulation of interleukin-4 production	3/125	27/18870	0.000738943	0.0158354	0.013146	942/53833/916	3
BP	GO:0002237	response to molecule of bacterial origin	9/125	369/18870	0.000791515	0.0168229	0.0139659	7431/949/942/941/3620/4283/10225/22914/4049	9
BP	GO:0032623	interleukin-2 production	4/125	63/18870	0.000808192	0.0169003	0.0140302	942/941/53833/916	4
BP	GO:0032663	regulation of interleukin-2 production	4/125	63/18870	0.000808192	0.0169003	0.0140302	942/941/53833/916	4
BP	GO:0044342	type B pancreatic cell proliferation	3/125	28/18870	0.00082363	0.0170854	0.0141838	5798/6422/632	3
BP	GO:1905954	positive regulation of lipid localization	5/125	111/18870	0.000861615	0.0177315	0.0147202	5244/4481/949/123/154664	5
BP	GO:0010594	regulation of endothelial cell migration	7/125	231/18870	0.000883308	0.0180348	0.014972	22846/949/285/3162/7422/1950/7476	7
BP	GO:0002710	negative regulation of T cell mediated immunity	3/125	29/18870	0.000914241	0.0185205	0.0153752	941/53833/6693	3
BP	GO:0002825	regulation of T-helper 1 type immune response	3/125	31/18870	0.00111386	0.0223486	0.0185531	3594/941/246778	3
BP	GO:0007162	negative regulation of cell adhesion	8/125	312/18870	0.0011278	0.0223486	0.0185531	285/7422/942/941/3620/3559/53833/6693	8
BP	GO:0002274	myeloid leukocyte activation	7/125	241/18870	0.00112997	0.0223486	0.0185531	8832/8530/201294/5169/1776/146722/1773	7
BP	GO:0045576	mast cell activation	4/125	69/18870	0.00113768	0.0223486	0.0185531	8832/201294/5169/146722	4
BP	GO:0050922	negative regulation of chemotaxis	4/125	70/18870	0.00120052	0.0234056	0.0194306	6480/285/2841/22914	4
BP	GO:0046660	female sex differentiation	5/125	120/18870	0.00122212	0.023494	0.0195041	5798/6422/268/7422/3625	5
BP	GO:0033006	regulation of mast cell activation involved in immune response	3/125	32/18870	0.00122318	0.023494	0.0195041	8832/201294/5169	3
BP	GO:0046635	positive regulation of alpha-beta T cell activation	4/125	72/18870	0.0013334	0.0254229	0.0211053	3594/942/941/916	4
BP	GO:0002286	T cell activation involved in immune response	5/125	123/18870	0.00136398	0.0258161	0.0214318	3594/942/941/246778/6693	5
BP	GO:1905952	regulation of lipid localization	6/125	183/18870	0.00138576	0.0260383	0.0216162	5244/4481/949/1950/123/154664	6
BP	GO:0032743	positive regulation of interleukin-2 production	3/125	34/18870	0.00146155	0.0270699	0.0224726	942/941/916	3
BP	GO:0043372	positive regulation of CD4-positive, alpha-beta T cell differentiation	3/125	34/18870	0.00146155	0.0270699	0.0224726	3594/942/941	3
BP	GO:0046637	regulation of alpha-beta T cell differentiation	4/125	74/18870	0.00147623	0.0271481	0.0225375	3594/942/941/246778	4
BP	GO:0050804	modulation of chemical synaptic transmission	10/125	489/18870	0.00155006	0.0283049	0.0234979	9498/6857/347733/152404/7476/22854/2899/5028/3766/632	10
BP	GO:0099177	regulation of trans-synaptic signaling	10/125	490/18870	0.00157363	0.0284494	0.0236178	9498/6857/347733/152404/7476/22854/2899/5028/3766/632	10
BP	GO:0032633	interleukin-4 production	3/125	35/18870	0.00159088	0.0284494	0.0236178	942/53833/916	3
BP	GO:0032673	regulation of interleukin-4 production	3/125	35/18870	0.00159088	0.0284494	0.0236178	942/53833/916	3
BP	GO:0030301	cholesterol transport	5/125	128/18870	0.00162693	0.0285476	0.0236993	5244/4481/949/1950/154664	5
BP	GO:0031343	positive regulation of cell killing	4/125	76/18870	0.0016294	0.0285476	0.0236993	3594/909/5551/22914	4
BP	GO:0042267	natural killer cell mediated cytotoxicity	4/125	76/18870	0.0016294	0.0285476	0.0236993	201294/3002/9437/22914	4
BP	GO:0017157	regulation of exocytosis	6/125	190/18870	0.00167725	0.0291887	0.0242316	9498/8832/6857/201294/7476/5028	6
BP	GO:0010595	positive regulation of endothelial cell migration	5/125	130/18870	0.0017419	0.0301116	0.0249978	949/3162/7422/1950/7476	5
BP	GO:0002676	regulation of chronic inflammatory response	2/125	10/18870	0.00189199	0.0322758	0.0267944	3620/4049	2
BP	GO:0002883	regulation of hypersensitivity	2/125	10/18870	0.00189199	0.0322758	0.0267944	53833/6693	2
BP	GO:0002437	inflammatory response to antigenic stimulus	4/125	80/18870	0.00196827	0.0333577	0.0276925	3559/53833/6693/4049	4
BP	GO:0042060	wound healing	9/125	423/18870	0.00203543	0.0342719	0.0284515	949/51206/3162/7450/7422/5328/7476/3678/5028	9
BP	GO:0050727	regulation of inflammatory response	9/125	425/18870	0.00210132	0.0351531	0.0291831	8530/3620/3559/5169/1776/53833/6693/1773/4049	9
BP	GO:0070229	negative regulation of lymphocyte apoptotic process	3/125	39/18870	0.00217903	0.0362194	0.0300683	3620/9212/5133	3
BP	GO:0045625	regulation of T-helper 1 cell differentiation	2/125	11/18870	0.00230242	0.0380266	0.0315685	941/246778	2
BP	GO:0043368	positive T cell selection	3/125	40/18870	0.00234441	0.038475	0.0319408	3594/6693/916	3
BP	GO:0015918	sterol transport	5/125	141/18870	0.00248356	0.0405023	0.0336238	5244/4481/949/1950/154664	5
BP	GO:0042391	regulation of membrane potential	9/125	440/18870	0.00265168	0.0429738	0.0356756	9498/5026/152404/6327/7476/6512/2899/4878/3766	9
BP	GO:0007269	neurotransmitter secretion	5/125	144/18870	0.00272042	0.0434952	0.0361084	9498/6857/7476/5028/632	5
BP	GO:0099643	signal release from synapse	5/125	144/18870	0.00272042	0.0434952	0.0361084	9498/6857/7476/5028/632	5
BP	GO:0002645	positive regulation of tolerance induction	2/125	12/18870	0.00275095	0.0434952	0.0361084	3620/916	2
BP	GO:0045060	negative thymic T cell selection	2/125	12/18870	0.00275095	0.0434952	0.0361084	6693/916	2
BP	GO:0015711	organic anion transport	9/125	443/18870	0.00277437	0.0435996	0.0361951	5244/9498/6515/123/6512/9121/3766/1375/9311	9
BP	GO:0051701	biological process involved in interaction with host	6/125	211/18870	0.00283519	0.044287	0.0367657	949/6404/942/941/3678/3625	6
BP	GO:0043542	endothelial cell migration	7/125	284/18870	0.00286372	0.0444649	0.0369134	22846/949/285/3162/7422/1950/7476	7
BP	GO:0045619	regulation of lymphocyte differentiation	6/125	212/18870	0.00290225	0.0447949	0.0371874	3594/6422/942/941/3559/246778	6
BP	GO:0060078	regulation of postsynaptic membrane potential	5/125	148/18870	0.00306119	0.0469684	0.0389917	5026/152404/7476/6512/2899	5
BP	GO:1903307	positive regulation of regulated secretory pathway	3/125	44/18870	0.00308279	0.0470216	0.039036	9498/6857/201294	3
BP	GO:0002674	negative regulation of acute inflammatory response	2/125	13/18870	0.00323706	0.0477196	0.0396154	53833/6693	2
BP	GO:0043383	negative T cell selection	2/125	13/18870	0.00323706	0.0477196	0.0396154	6693/916	2
BP	GO:0044406	adhesion of symbiont to host	2/125	13/18870	0.00323706	0.0477196	0.0396154	949/3625	2
BP	GO:0070234	positive regulation of T cell apoptotic process	2/125	13/18870	0.00323706	0.0477196	0.0396154	3620/5133	2
BP	GO:1902667	regulation of axon guidance	2/125	13/18870	0.00323706	0.0477196	0.0396154	7422/347733	2
BP	GO:0031640	killing of cells of another organism	4/125	92/18870	0.00327216	0.0477196	0.0396154	3002/10578/5551/3004	4
BP	GO:0141061	disruption of cell in another organism	4/125	92/18870	0.00327216	0.0477196	0.0396154	3002/10578/5551/3004	4
BP	GO:0030100	regulation of endocytosis	7/125	291/18870	0.00327578	0.0477196	0.0396154	949/55423/7018/7422/1950/154664/146722	7
BP	GO:0050679	positive regulation of epithelial cell proliferation	6/125	218/18870	0.00332993	0.0482375	0.0400453	5798/3162/6422/7422/1950/7476	6
CC	GO:0009897	external side of plasma membrane	18/129	387/19886	6.64685e-11	1.48889e-08	1.23142e-08	3604/8832/3594/921/942/941/51744/5328/3559/4283/5169/909/3678/1237/5133/6693/916/22914	18
CC	GO:0005581	collagen trimer	6/129	86/19886	2.03874e-05	0.00228339	0.00188852	4481/1298/1286/114904/1292/136227	6
CC	GO:0044194	cytolytic granule	3/129	13/19886	7.27325e-05	0.00543069	0.00449155	3002/10578/5551	3
CC	GO:0001772	immunological synapse	4/129	45/19886	0.000204933	0.0114763	0.00949164	3002/951/5551/916	4
CC	GO:0030666	endocytic vesicle membrane	7/129	202/19886	0.000353458	0.0157853	0.0130555	4481/6857/949/7018/1950/7476/6565	7
CC	GO:0030139	endocytic vesicle	9/129	348/19886	0.000451291	0.0157853	0.0130555	7431/4481/6857/949/7018/10578/1950/7476/6565	9
CC	GO:0062023	collagen-containing extracellular matrix	10/129	429/19886	0.000493291	0.0157853	0.0130555	1298/1286/285/6422/7450/1292/81794/136227/4878/6693	10
CC	GO:0045177	apical part of cell	10/129	469/19886	0.000976849	0.0251873	0.0208316	5244/9498/22846/7018/10752/286204/5169/115584/6565/5028	10
CC	GO:0005788	endoplasmic reticulum lumen	8/129	313/19886	0.00101199	0.0251873	0.0208316	1298/1286/7018/1292/7476/136227/246778/632	8
CC	GO:0098978	glutamatergic synapse	9/129	407/19886	0.00136361	0.0305449	0.0252627	9498/6857/4885/7476/3678/22854/2899/5028/81831	9
CC	GO:0044306	neuron projection terminus	5/129	129/19886	0.0015396	0.0313518	0.0259301	9498/5798/6857/23769/2899	5
CC	GO:0030136	clathrin-coated vesicle	6/129	212/19886	0.0026246	0.0489926	0.0405202	5244/6857/7018/201294/7450/1950	6
CC	GO:0043204	perikaryon	5/129	149/19886	0.00288714	0.0497287	0.041129	5798/6515/2899/4878/632	5
CC	GO:0001931	uropod	2/129	13/19886	0.00310804	0.0497287	0.041129	6404/6693	2
MF	GO:0001618	virus receptor activity	5/125	79/18496	0.000196602	0.0371279	0.03008	949/6404/942/941/3678	5
MF	GO:0140272	exogenous protein binding	5/125	80/18496	0.000208584	0.0371279	0.03008	949/6404/942/941/3678	5

## Sheet: KEGG
	Description	GeneRatio	BgRatio	pvalue	p.adjust	qvalue	geneID	Count
hsa04940	Type I diabetes mellitus	6/93	44/9434	4.07216e-06	4.07216e-06	0.000750135	5798/3002/942/941/5551/4049	6
hsa05320	Autoimmune thyroid disease	5/93	54/9434	0.000180453	0.000180453	0.0144249	3002/942/941/7253/5551	5
hsa04512	ECM-receptor interaction	6/93	89/9434	0.00023492	0.00023492	0.0144249	1298/1286/51206/7450/1292/3678	6
hsa04640	Hematopoietic cell lineage	6/93	100/9434	0.000441894	0.000441894	0.0193128	951/921/3559/909/3678/916	6
hsa05330	Allograft rejection	4/93	39/9434	0.000559048	0.000559048	0.0193128	3002/942/941/5551	4
hsa04060	Cytokine-cytokine receptor interaction	10/93	298/9434	0.000676145	0.000676145	0.0193128	3604/3594/268/3559/4283/3625/53833/1237/246778/4049	10
hsa04066	HIF-1 signaling pathway	6/93	110/9434	0.000733888	0.000733888	0.0193128	7018/285/3162/7422/1950/4878	6
hsa05332	Graft-versus-host disease	4/93	45/9434	0.000968076	0.000968076	0.0202328	3002/942/941/5551	4
hsa04514	Cell adhesion molecules	7/93	160/9434	0.000988515	0.000988515	0.0202328	6404/942/941/152404/22854/5133/6693	7
hsa04151	PI3K-Akt signaling pathway	10/93	362/9434	0.00290089	0.00290089	0.0504285	1298/1286/285/7450/7422/3559/1950/1292/3678/57121	10
hsa04061	Viral protein interaction with cytokine and cytokine receptor	5/93	100/9434	0.0030113	0.0030113	0.0504285	3559/4283/53833/1237/4049	5
hsa04510	Focal adhesion	7/93	203/9434	0.00382623	0.00382623	0.058736	1298/1286/7450/7422/1950/1292/3678	7
hsa05165	Human papillomavirus infection	9/93	333/9434	0.00542089	0.00542089	0.0768142	1298/1286/7450/7422/1950/1292/890/7476/3678	9
hsa05219	Bladder cancer	3/93	41/9434	0.00754179	0.00754179	0.0992341	1890/7422/1950	3
hsa04650	Natural killer cell mediated cytotoxicity	5/93	134/9434	0.0102887	0.0102887	0.126353	3002/51744/5551/9437/22914	5
hsa05410	Hypertrophic cardiomyopathy	4/93	99/9434	0.0163578	0.0163578	0.18833	9254/7134/93589/3678	4
hsa04974	Protein digestion and absorption	4/93	105/9434	0.0198718	0.0198718	0.203366	1298/1286/1292/136227	4
hsa05414	Dilated cardiomyopathy	4/93	105/9434	0.0198718	0.0198718	0.203366	9254/7134/93589/3678	4
hsa04659	Th17 cell differentiation	4/93	109/9434	0.0224547	0.0224547	0.217704	3594/3559/246778/916	4
hsa04630	JAK-STAT signaling pathway	5/93	168/9434	0.0249814	0.0249814	0.230092	3594/3559/1950/53833/246778	5
hsa04820	Cytoskeleton in muscle cells	6/93	233/9434	0.0273224	0.0273224	0.23967	7431/1298/1286/7134/1292/3678	6
hsa05416	Viral myocarditis	3/93	70/9434	0.0315896	0.0315896	0.264506	942/941/5551	3
