# Supplementary material
Source: Research Square preprint supplement (doi:10.21203/rs.3.rs-9651090/v1)
Supplement: Supplementary file 9 [file f9717e5926cb76299c976d93.xlsx]

## Sheet: GSEA
Supplementary Table 8. GSEA results for differentially expressed genes between the high- and low-risk groups
ID	Description	setSize	enrichmentScore	NES	pvalue	p.adjust	qvalue	rank	leading_edge	core_enrichment
KEGG_OLFACTORY_TRANSDUCTION	KEGG_OLFACTORY_TRANSDUCTION	118	0.624529	1.8911	5.16012e-10	9.59783e-08	7.87598e-08	3565	tags=54%, list=20%, signal=44%	OR4C6/OR12D2/OR3A3/OR13A1/OR2AT4/OR11A1/GUCA1C/OR56A3/OR2H2/OR4D9/OR4N2/OR2H1/OR5V1/OR4K2/OR1D2/OR1A1/OR10A2/CALML6/CNGA3/GUCY2D/OR10H1/OR52A1/CLCA2/OR7G2/OR10H5/OR5C1/OR2A4/OR11G2/OR13J1/OR7D4/OR1K1/OR8A1/OR5A1/OR1I1/OR1M1/GUCA1A/CAMK2A/OR7A17/OR2B6/OR52N2/OR10Z1/OR3A2/OR3A1/OR2A14/OR56B1/OR7D2/OR9A4/GUCA1B/OR2A42/OR4D1/OR2AG1/CLCA4/OR52N4/CNGA4/OR52K1/OR2A25/OR51B5/OR14J1/CLCA1/OR10AD1/OR52B6/O…
KEGG_VALINE_LEUCINE_AND_ISOLEUCINE_DEGRADATION	KEGG_VALINE_LEUCINE_AND_ISOLEUCINE_DEGRADATION	44	-0.677689	-2.54816	2.49117e-08	2.31679e-06	1.90116e-06	2150	tags=61%, list=12%, signal=54%	IVD/ACADS/MCCC1/HIBADH/HMGCS1/HADHB/HADH/ALDH1B1/DLD/ALDH9A1/DBT/HIBCH/MMUT/BCKDHB/AUH/AOX1/ABAT/ACADM/ACAA2/ALDH3A2/EHHADH/ACADSB/PCCA/OXCT1/ACAT1/HMGCS2/ALDH6A1
KEGG_FATTY_ACID_METABOLISM	KEGG_FATTY_ACID_METABOLISM	42	-0.644405	-2.43049	4.90847e-07	3.04325e-05	2.49729e-05	1762	tags=50%, list=10%, signal=45%	CPT2/HADHB/ADH1A/HADH/ALDH1B1/ALDH9A1/ADH5/ACADL/CPT1A/ACSL1/ADH6/ACADM/ACAA2/ALDH3A2/EHHADH/ACADSB/CYP4A22/ACAT1/ADH1C/CYP4A11/ADH4
KEGG_PROPANOATE_METABOLISM	KEGG_PROPANOATE_METABOLISM	32	-0.681424	-2.38335	1.90669e-06	8.86611e-05	7.27553e-05	1657	tags=50%, list=9%, signal=45%	PCCB/SUCLG1/SUCLG2/ALDH1B1/ALDH9A1/HIBCH/MMUT/SUCLA2/ABAT/ACADM/ALDH3A2/EHHADH/PCCA/ACSS3/ACAT1/ALDH6A1
KEGG_CITRATE_CYCLE_TCA_CYCLE	KEGG_CITRATE_CYCLE_TCA_CYCLE	29	-0.676368	-2.2956	6.53945e-06	0.000243268	0.000199625	4197	tags=69%, list=23%, signal=53%	MDH1/FH/SDHB/PDHB/OGDH/ACLY/SUCLG1/ACO1/SUCLG2/SDHC/PCK2/DLST/DLD/SDHD/IDH3A/ACO2/DLAT/SUCLA2/OGDHL/PCK1
KEGG_CYTOKINE_CYTOKINE_RECEPTOR_INTERACTION	KEGG_CYTOKINE_CYTOKINE_RECEPTOR_INTERACTION	238	0.476216	1.511	2.48129e-05	0.000769199	0.000631204	3634	tags=39%, list=20%, signal=31%	IL20RB/IL22RA2/INHBE/CXCL13/AMH/CSF2/TNFSF14/IL21/CCL19/IL6/CCL25/IFNL1/IFNG/IFNE/EPO/CXCL5/CCL11/TNFRSF17/TNFRSF13B/IL1R2/IL2RA/CCL21/TNFRSF18/IL19/TNFRSF13C/LTA/IL2RG/CCL5/XCL1/CCL26/CXCR3/CCL7/TNFRSF9/IL23A/FLT3LG/CD27/CRLF2/IL13/INHBC/IL4/HGF/LTB/IL11/XCL2/IL21R/IL2/TNFRSF25/FASLG/LIF/CXCL9/CXCR5/IL9R/CCL13/CXCL3/CD70/GDF5/TNFSF13B/CCR8/PDGFRA/IL26/IL12RB1/CXCL1/TNFRSF11A/CCR7/TNFRSF8/CCR5/CS…
KEGG_PYRUVATE_METABOLISM	KEGG_PYRUVATE_METABOLISM	39	-0.575341	-2.15977	6.00061e-05	0.00159445	0.0013084	2032	tags=31%, list=11%, signal=27%	GLO1/PCK2/ACOT12/ALDH1B1/DLD/ALDH9A1/DLAT/PKLR/ALDH3A2/ACAT1/LDHD/PCK1
KEGG_PRIMARY_IMMUNODEFICIENCY	KEGG_PRIMARY_IMMUNODEFICIENCY	34	0.663099	1.75206	0.000211456	0.00491634	0.00403435	2251	tags=50%, list=13%, signal=44%	CD79A/IGLL1/CD19/TNFRSF13B/TNFRSF13C/AICDA/IL2RG/ZAP70/AIRE/JAK3/ADA/CD8B/CD3D/CD8A/CD3E/LCK/ICOS
KEGG_RENIN_ANGIOTENSIN_SYSTEM	KEGG_RENIN_ANGIOTENSIN_SYSTEM	17	-0.70752	-2.06138	0.000240236	0.00496487	0.00407417	1330	tags=47%, list=7%, signal=44%	ENPEP/CPA3/AGTR2/CTSG/ACE2/REN/AGTR1/CMA1
KEGG_VIBRIO_CHOLERAE_INFECTION	KEGG_VIBRIO_CHOLERAE_INFECTION	53	-0.478239	-1.88594	0.000301688	0.00529179	0.00434245	1355	tags=21%, list=8%, signal=19%	KCNQ1/ADCY9/SLC12A2/ATP6V1D/PLCG2/ATP6V1A/CFTR/ATP6V1B1/ATP6V0D2/ATP6V0A4/ATP6V1G3
KEGG_PEROXISOME	KEGG_PEROXISOME	78	-0.421355	-1.81314	0.000312956	0.00529179	0.00434245	5003	tags=53%, list=28%, signal=38%	ACSL4/SLC25A17/PMVK/PEX13/ECI2/HACL1/MLYCD/PEX10/FAR2/AMACR/PXMP2/HSD17B4/ACSL3/CROT/HMGCL/DAO/ACOX1/PEX2/PEX12/SCP2/DHRS4/PEX19/PEX1/PEX11A/ACOX2/PECR/PEX3/CRAT/ABCD3/AGPS/DDO/PEX7/NUDT12/EPHX2/PHYH/ACSL1/CAT/EHHADH/NOS2/SLC27A2/HAO2
KEGG_EPITHELIAL_CELL_SIGNALING_IN_HELICOBACTER_PYLORI_INFECTION	KEGG_EPITHELIAL_CELL_SIGNALING_IN_HELICOBACTER_PYLORI_INFECTION	68	-0.435865	-1.82455	0.000556624	0.00862767	0.00707987	488	tags=10%, list=3%, signal=10%	ATP6V1D/PLCG2/ATP6V1A/ATP6V1B1/ATP6V0D2/ATP6V0A4/ATP6V1G3
KEGG_MATURITY_ONSET_DIABETES_OF_THE_YOUNG	KEGG_MATURITY_ONSET_DIABETES_OF_THE_YOUNG	21	0.70094	1.70994	0.000955718	0.0136741	0.011221	1639	tags=43%, list=9%, signal=39%	PAX6/FOXA2/MNX1/NKX2-2/NKX6-1/NEUROG3/NEUROD1/ONECUT1/GCK
KEGG_PPAR_SIGNALING_PATHWAY	KEGG_PPAR_SIGNALING_PATHWAY	68	-0.419343	-1.75538	0.00118148	0.0156968	0.0128808	2038	tags=32%, list=11%, signal=29%	ACOX2/PPARA/RXRG/PCK2/CPT2/CYP27A1/ACADL/PPARG/LPL/CPT1A/ACSL1/ACADM/EHHADH/CD36/CYP4A22/FABP4/HMGCS2/SCD5/CYP4A11/SLC27A2/APOA2/PCK1
KEGG_BUTANOATE_METABOLISM	KEGG_BUTANOATE_METABOLISM	33	-0.497969	-1.74649	0.00226373	0.0280703	0.0230344	1744	tags=58%, list=10%, signal=52%	PDHB/HMGCL/ACSM5/ACSM3/ACADS/HMGCS1/HADH/BDH2/ALDH1B1/ALDH9A1/BDH1/ALDH5A1/ABAT/ALDH3A2/EHHADH/L2HGDH/OXCT1/ACAT1/HMGCS2
KEGG_GLYCOLYSIS_GLUCONEOGENESIS	KEGG_GLYCOLYSIS_GLUCONEOGENESIS	58	-0.420475	-1.68495	0.00265336	0.0308453	0.0253116	2153	tags=31%, list=12%, signal=27%	ALDOC/BPGM/PCK2/ADH1A/ALDH1B1/DLD/ALDH9A1/PFKM/ADH5/DLAT/ALDOB/PKLR/ADH6/ALDH3A2/FBP1/ADH1C/PCK1/ADH4
KEGG_OXIDATIVE_PHOSPHORYLATION	KEGG_OXIDATIVE_PHOSPHORYLATION	128	-0.316743	-1.43437	0.00500436	0.0547536	0.0449308	1524	tags=11%, list=8%, signal=10%	UQCRFS1/COX7A1/NDUFS1/SDHD/COX4I2/ATP5F1A/ATP6V1D/ATP12A/ATP6V1A/ATP4B/ATP6V1B1/ATP6V0D2/ATP6V0A4/ATP6V1G3
KEGG_TERPENOID_BACKBONE_BIOSYNTHESIS	KEGG_TERPENOID_BACKBONE_BIOSYNTHESIS	14	-0.614214	-1.71337	0.0100369	0.103714	0.0851081	1981	tags=43%, list=11%, signal=38%	PDSS2/HMGCS1/HMGCR/IDI1/ACAT1/HMGCS2
KEGG_HEMATOPOIETIC_CELL_LINEAGE	KEGG_HEMATOPOIETIC_CELL_LINEAGE	83	0.483489	1.42872	0.0144605	0.132851	0.109018	4693	tags=48%, list=26%, signal=36%	CSF2/IL6/CD19/EPO/IL1R2/FCER2/CR2/IL2RA/MS4A1/CD7/FLT3LG/ITGA2B/IL4/CD8B/IL11/CD3D/CD8A/CD38/CD3E/FCGR1A/THPO/CD2/IL9R/CD5/CD44/CSF3/CD3G/CR1/CD37/CSF3R/ITGA3/CD14/IL7R/CD4/ITGA5/CSF2RA/CSF1/CD33/EPOR/CSF1R
KEGG_TASTE_TRANSDUCTION	KEGG_TASTE_TRANSDUCTION	37	0.554154	1.49183	0.0157616	0.132851	0.109018	3704	tags=41%, list=21%, signal=32%	SCNN1G/SCNN1B/CACNA1B/GNB3/GRM4/TAS1R3/GNG3/PLCB2/CACNA1A/KCNB1/TAS2R1/TAS1R1/TAS2R20/ASIC2/TAS2R5
KEGG_INOSITOL_PHOSPHATE_METABOLISM	KEGG_INOSITOL_PHOSPHATE_METABOLISM	54	-0.375033	-1.48075	0.0159139	0.132851	0.109018	3181	tags=35%, list=18%, signal=29%	PTEN/PIK3C2B/ITPKB/PLCD1/PIK3CB/IPPK/PIK3C3/PIK3CA/INPP5A/PLCB1/INPP4B/PIK3C2A/MIOX/PLCG2/IMPA2/PIP5K1B/INPP5J/ALDH6A1/PIK3C2G
KEGG_LYSINE_DEGRADATION	KEGG_LYSINE_DEGRADATION	44	-0.394232	-1.48234	0.016432	0.132851	0.109018	4072	tags=45%, list=23%, signal=35%	KMT5B/ALDH7A1/HADHA/SETDB2/AASDH/OGDH/AASDHPPT/SETD7/ASH1L/TMLHE/SETMAR/HADH/DLST/ALDH1B1/ALDH9A1/BBOX1/ALDH3A2/EHHADH/OGDHL/ACAT1
KEGG_INTESTINAL_IMMUNE_NETWORK_FOR_IGA_PRODUCTION	KEGG_INTESTINAL_IMMUNE_NETWORK_FOR_IGA_PRODUCTION	45	0.5221	1.45408	0.0167791	0.132851	0.109018	5982	tags=64%, list=33%, signal=43%	IL6/CCL25/TNFRSF17/TNFRSF13B/TNFRSF13C/AICDA/IL4/IL2/MADCAM1/HLA-DOB/TNFSF13B/ICOS/CD80/IL15RA/CD28/CD40LG/CCR9/LTBR/CD86/TGFB1/CCR10/HLA-DQA1/HLA-DMA/HLA-DPB1/CXCR4/HLA-DRB1/HLA-DMB/HLA-DPA1/IL10
KEGG_CARDIAC_MUSCLE_CONTRACTION	KEGG_CARDIAC_MUSCLE_CONTRACTION	76	0.476972	1.40265	0.0171421	0.132851	0.109018	4851	tags=39%, list=27%, signal=29%	RYR2/TNNI3/CACNG6/CACNG2/CACNG7/MYL2/COX6B2/ATP1A3/CACNG4/MYH6/CACNG3/MYH7/CACNA2D4/CACNA1F/CACNG1/CACNG5/ATP1A4/CACNB1/CACNB3/TPM2/COX8C/CACNG8/MT-CYB/TPM4/MT-CO2/TNNT2/CACNA2D3/MT-CO3/MT-CO1/COX6C
KEGG_ARGININE_AND_PROLINE_METABOLISM	KEGG_ARGININE_AND_PROLINE_METABOLISM	54	-0.363463	-1.43507	0.0211786	0.154069	0.126429	1657	tags=26%, list=9%, signal=24%	ALDH1B1/ALDH9A1/GLUD2/CKB/AMD1/GOT1/AGMAT/CKMT1A/GATM/ALDH3A2/NOS2/CKMT1B/CKMT2/OTC
KEGG_PROXIMAL_TUBULE_BICARBONATE_RECLAMATION	KEGG_PROXIMAL_TUBULE_BICARBONATE_RECLAMATION	23	-0.485597	-1.54595	0.0215365	0.154069	0.126429	3119	tags=52%, list=17%, signal=43%	SLC9A3/SLC38A3/GLUD1/ATP1B1/PCK2/SLC4A4/GLUD2/ATP1A1/CA2/AQP1/CA4/PCK1
KEGG_LIMONENE_AND_PINENE_DEGRADATION	KEGG_LIMONENE_AND_PINENE_DEGRADATION	10	-0.64972	-1.60516	0.0233376	0.160147	0.131417	1657	tags=60%, list=9%, signal=54%	ALDH7A1/HADHA/ALDH1B1/ALDH9A1/ALDH3A2/EHHADH
KEGG_ADIPOCYTOKINE_SIGNALING_PATHWAY	KEGG_ADIPOCYTOKINE_SIGNALING_PATHWAY	66	-0.321149	-1.34947	0.0241081	0.160147	0.131417	3538	tags=30%, list=20%, signal=24%	PRKAB2/ACSL3/NFKBIA/PRKAB1/PRKAA1/MAPK8/CHUK/PRKAG2/PPARA/RXRG/PCK2/LEPR/AKT3/CPT1A/ACSL1/PRKAA2/CD36/SLC2A4/PPARGC1A/PCK1
KEGG_HOMOLOGOUS_RECOMBINATION	KEGG_HOMOLOGOUS_RECOMBINATION	28	0.570352	1.46376	0.0249692	0.160147	0.131417	4582	tags=43%, list=25%, signal=32%	RAD54B/EME1/RAD54L/RAD51/XRCC2/RPA4/BLM/XRCC3/SEM1/RAD52/POLD4/POLD1
KEGG_GRAFT_VERSUS_HOST_DISEASE	KEGG_GRAFT_VERSUS_HOST_DISEASE	37	0.535532	1.4417	0.0284738	0.170763	0.140128	7433	tags=78%, list=41%, signal=46%	IL6/IFNG/IL2/HLA-DOB/FASLG/GZMB/CD80/KLRC1/CD28/HLA-F/CD86/HLA-G/TNF/HLA-DQA1/HLA-DMA/HLA-DPB1/PRF1/HLA-DRB1/KIR3DL2/HLA-DMB/HLA-DPA1/HLA-A/HLA-DQA2/HLA-DQB1/HLA-DRA/HLA-DOA/HLA-DRB5/IL1A/HLA-B
KEGG_ALLOGRAFT_REJECTION	KEGG_ALLOGRAFT_REJECTION	35	0.541356	1.4391	0.0287687	0.170763	0.140128	7433	tags=86%, list=41%, signal=50%	IFNG/IL4/IL2/HLA-DOB/FASLG/GZMB/CD80/CD28/CD40LG/IL12A/HLA-F/CD86/HLA-G/TNF/HLA-DQA1/HLA-DMA/HLA-DPB1/PRF1/HLA-DRB1/HLA-DMB/HLA-DPA1/IL10/HLA-A/IL5/HLA-DQA2/HLA-DQB1/HLA-DRA/HLA-DOA/HLA-DRB5/HLA-B
KEGG_TYPE_I_DIABETES_MELLITUS	KEGG_TYPE_I_DIABETES_MELLITUS	40	0.527844	1.44427	0.0293785	0.170763	0.140128	5973	tags=60%, list=33%, signal=40%	PTPRN/IFNG/GAD1/LTA/IL2/HLA-DOB/FASLG/GZMB/CD80/CPE/CD28/GAD2/IL12A/HLA-F/CD86/HLA-G/TNF/HLA-DQA1/HLA-DMA/HLA-DPB1/PRF1/HLA-DRB1/HLA-DMB/HLA-DPA1
KEGG_AUTOIMMUNE_THYROID_DISEASE	KEGG_AUTOIMMUNE_THYROID_DISEASE	38	0.527153	1.42598	0.0308219	0.173724	0.142558	7433	tags=87%, list=41%, signal=51%	CTLA4/IL4/IL2/HLA-DOB/FASLG/GZMB/CD80/TG/TSHB/CD28/CD40LG/HLA-F/CD86/HLA-G/IFNA5/HLA-DQA1/HLA-DMA/HLA-DPB1/TPO/PRF1/TSHR/HLA-DRB1/HLA-DMB/HLA-DPA1/IL10/HLA-A/IL5/HLA-DQA2/HLA-DQB1/HLA-DRA/HLA-DOA/HLA-DRB5/HLA-B
KEGG_CELL_CYCLE	KEGG_CELL_CYCLE	124	0.43688	1.33157	0.0337079	0.183251	0.150376	2957	tags=23%, list=16%, signal=20%	CCNA1/PLK1/CDC20/PTTG1/CDC25C/CCNB2/PKMYT1/BUB1/ORC6/BUB1B/CCNE1/CDC45/CDKN2A/CCNA2/SMC1B/CCNB1/E2F2/TTK/SFN/CDK1/CDC25B/ESPL1/CDC6/CDC25A/ORC1/MAD1L1/E2F1/CDC7/CHEK2
KEGG_HYPERTROPHIC_CARDIOMYOPATHY_HCM	KEGG_HYPERTROPHIC_CARDIOMYOPATHY_HCM	83	0.461103	1.36257	0.0344828	0.183251	0.150376	4459	tags=39%, list=25%, signal=29%	RYR2/TNNI3/CACNG6/IL6/CACNG2/CACNG7/MYL2/CACNG4/MYH6/CACNG3/MYH7/CACNA2D4/MYBPC3/ITGA2B/CACNA1F/CACNG1/CACNG5/PRKAG3/CACNB1/CACNB3/ITGB4/SGCG/ITGB6/TPM2/CACNG8/ITGA3/ITGA11/TPM4/TNNT2/TGFB3/ITGA5/TGFB1
KEGG_CHEMOKINE_SIGNALING_PATHWAY	KEGG_CHEMOKINE_SIGNALING_PATHWAY	183	0.407538	1.27213	0.0375635	0.194078	0.15926	5522	tags=42%, list=31%, signal=29%	CXCL13/GNB3/CCL19/CCL25/GNG4/CXCL5/CCL11/CCL21/GNG8/CCL5/XCL1/CCL26/CXCR3/CCL7/JAK3/XCL2/GNG3/CXCL9/CXCR5/GRK7/CCL13/RAC2/CXCL3/PLCB2/CCR8/PIK3R2/WAS/SHC3/CXCL1/CCR7/CCR5/STAT2/CXCR6/ITK/PF4/NCF1/CCL20/CXCL8/CCL4/CXCL2/VAV1/XCR1/CCR9/CCL24/CCR3/ADCY7/GNGT1/SHC4/CXCL11/HCK/DOCK2/CCL4L2/PRKCB/CCL17/PIK3R5/CCR10/SHC1/STAT1/PIK3CD/GRK2/PTK2B/CSK/CCL23/CCR4/ARRB2/CCL3/CXCL10/RASGRP2/CCR2/CCR6/PF4V1/FG…
KEGG_JAK_STAT_SIGNALING_PATHWAY	KEGG_JAK_STAT_SIGNALING_PATHWAY	134	0.42253	1.29517	0.038736	0.194727	0.159793	3722	tags=31%, list=21%, signal=25%	IL20RB/IL22RA2/CSF2/IL21/IL6/IFNL1/IFNG/IFNE/EPO/IL2RA/IL19/IL2RG/IL23A/CRLF2/JAK3/IL13/IL13RA2/IL4/IL11/IL21R/IL2/LIF/IL9R/IRF9/IL26/PIK3R2/IL12RB1/SOCS1/CSF3/IL2RB/STAT2/IL24/IL15RA/IL23R/IL10RA/CSF3R/STAT4/IL22RA1/PTPN6/IL12A/IL10RB/OSM
KEGG_BETA_ALANINE_METABOLISM	KEGG_BETA_ALANINE_METABOLISM	22	-0.468284	-1.48708	0.0411228	0.201285	0.165175	1657	tags=36%, list=9%, signal=33%	ALDH1B1/ALDH9A1/UPB1/HIBCH/ABAT/ACADM/ALDH3A2/EHHADH
KEGG_LINOLEIC_ACID_METABOLISM	KEGG_LINOLEIC_ACID_METABOLISM	28	0.55171	1.41592	0.0435807	0.205606	0.168721	3608	tags=54%, list=20%, signal=43%	PLA2G2A/CYP2C9/PLA2G2D/PLA2G4E/CYP2C19/PLA2G1B/PLA2G2F/PLA2G4B/CYP3A43/CYP2E1/CYP2C18/PLA2G6/ALOX15/JMJD7-PLA2G4B/PLA2G5
KEGG_TRYPTOPHAN_METABOLISM	KEGG_TRYPTOPHAN_METABOLISM	40	-0.38259	-1.44325	0.0442164	0.205606	0.168721	1717	tags=32%, list=10%, signal=29%	HADH/ALDH1B1/ALDH9A1/ACMSD/DDC/CYP1A2/CAT/AOX1/ALDH3A2/EHHADH/CYP1A1/OGDHL/ACAT1
KEGG_NATURAL_KILLER_CELL_MEDIATED_CYTOTOXICITY	KEGG_NATURAL_KILLER_CELL_MEDIATED_CYTOTOXICITY	118	0.431711	1.30724	0.0461538	0.209381	0.171818	5055	tags=43%, list=28%, signal=31%	PRKCG/CSF2/IFNG/KLRK1/KLRC2/LAT/ZAP70/CHP2/ULBP1/FASLG/HCST/KLRC3/RAC2/SH2D1A/PIK3R2/LCK/NCR2/ITGAL/SHC3/GZMB/FCER1G/KLRC1/CD247/KIR2DL4/TYROBP/VAV1/MICB/CD244/ULBP2/FCGR3A/PTPN6/NCR1/SHC4/NCR3/LCP2/BID/ITGB2/FCGR3B/CD48/IFNAR2/PRKCB/PIK3R5/RAC3/SHC1/PIK3CD/HLA-G/PTK2B/IFNA5/TNF/PPP3R2/NFATC4
