# Supplementary material
Source: Research Square preprint supplement (doi:10.21203/rs.3.rs-9651090/v1)
Supplement: Supplementary file 10 [file fdafe601ee69c117bcf0c793.xlsx]

## Sheet: clumping
Supplementary Table 2. Instrumental variables for 209 candidate druggable genes included in the two-sample Mendelian randomization analysis of KIRC
	id.exposure	SNP	effect_allele.exposure	other_allele.exposure	effect_allele.outcome	other_allele.outcome	beta.exposure	beta.outcome	eaf.exposure	eaf.outcome	remove	palindromic	ambiguous	id.outcome	pos.outcome	pval.outcome	se.outcome	outcome	mr_keep.outcome	pval_origin.outcome	samplesize.outcome	control.outcome	case.outcome	chr.exposure	pos.exposure	se.exposure	pval.exposure	samplesize.exposure	ncase.exposure	ncontrol.exposure	exposure	mr_keep.exposure	pval_origin.exposure	id	rsid	pval	action	SNP_index	mr_keep	R	F	SYMBOL	ENSEMBL
1	eqtl-a-ENSG00000005471	rs10247098	A	C	A	C	0.0882812	0.0264627	0.819009	0.81196	FALSE	FALSE	FALSE	KIRC	87368378	0.57268	0.0469106	outcome	TRUE	reported	380248	378749	1499	7	86997694	0.0154408	1.08170789629595e-08	31300	NA	NA	eqtl-a-ENSG00000005471	TRUE	reported	eqtl-a-ENSG00000005471	rs10247098	1.08170789629595e-08	2	1	TRUE	0.0323008134686035	32.6886406025238	ABCB4	ENSG00000005471
2	eqtl-a-ENSG00000005471	rs10445308	T	C	T	C	-0.0744044	0.0283295	0.457514	0.529408	FALSE	FALSE	FALSE	KIRC	39781794	0.442634	0.0368992	outcome	TRUE	reported	380248	378749	1499	17	37938047	0.0119303	4.46611601064274e-10	31684	NA	NA	eqtl-a-ENSG00000005471	TRUE	reported	eqtl-a-ENSG00000005471	rs10445308	4.46611601064274e-10	2	1	TRUE	-0.0350166	38.8950656208417	ABCB4	ENSG00000005471
3	eqtl-a-ENSG00000005471	rs10487060	A	C	A	C	0.0802837	-0.0736345	0.167969	0.138156	FALSE	FALSE	FALSE	KIRC	86961037	0.166609	0.0532356	outcome	TRUE	reported	380248	378749	1499	7	86590353	0.0159063	4.48332270432733e-07	31556	NA	NA	eqtl-a-ENSG00000005471	TRUE	reported	eqtl-a-ENSG00000005471	rs10487060	4.48332270432733e-07	2	1	TRUE	0.0284024468938993	25.475130678778	ABCB4	ENSG00000005471
4	eqtl-a-ENSG00000005471	rs10808071	G	A	G	A	-0.153358	0.0144379	0.175803	0.151708	FALSE	FALSE	FALSE	KIRC	87511492	0.778329	0.0512895	outcome	TRUE	reported	380248	378749	1499	7	87140808	0.0155823	7.42164197738885e-23	31343	NA	NA	eqtl-a-ENSG00000005471	TRUE	reported	eqtl-a-ENSG00000005471	rs10808071	7.42164197738885e-23	2	1	TRUE	-0.0555071	96.8611786475084	ABCB4	ENSG00000005471
5	eqtl-a-ENSG00000005471	rs1089471	C	T	C	T	0.212371	0.142826	0.982287	0.959735	FALSE	FALSE	FALSE	KIRC	87326757	0.124293	0.0929249	outcome	TRUE	reported	380248	378749	1499	7	86956073	0.0450855	2.47229334606234e-06	25032	NA	NA	eqtl-a-ENSG00000005471	TRUE	reported	eqtl-a-ENSG00000005471	rs1089471	2.47229334606234e-06	2	1	TRUE	0.0297601757246777	22.1879226552623	ABCB4	ENSG00000005471
6	eqtl-a-ENSG00000005471	rs111269265	T	C	T	C	-0.224992	0.0439095	0.0421025	0.0673516	FALSE	FALSE	FALSE	KIRC	87185452	0.553139	0.0740385	outcome	TRUE	reported	380248	378749	1499	7	86814768	0.0295762	2.80091545538292e-14	29836	NA	NA	eqtl-a-ENSG00000005471	TRUE	reported	eqtl-a-ENSG00000005471	rs111269265	2.80091545538292e-14	2	1	TRUE	-0.0439995	57.8694565306548	ABCB4	ENSG00000005471
7	eqtl-a-ENSG00000005471	rs111356636	G	A	G	A	-0.217313	0.0505787	0.0419073	0.066712	FALSE	FALSE	FALSE	KIRC	87129635	0.496043	0.0743008	outcome	TRUE	reported	380248	378749	1499	7	86758951	0.0296463	2.29456307251928e-13	29832	NA	NA	eqtl-a-ENSG00000005471	TRUE	reported	eqtl-a-ENSG00000005471	rs111356636	2.29456307251928e-13	2	1	TRUE	-0.0424031	53.7316796023704	ABCB4	ENSG00000005471
8	eqtl-a-ENSG00000005471	rs111500959	C	T	C	T	-0.237592	0.0506374	0.0416251	0.0671204	FALSE	FALSE	FALSE	KIRC	87228037	0.495305	0.0742598	outcome	TRUE	reported	380248	378749	1499	7	86857353	0.0297316	1.3341356829031e-15	29135	NA	NA	eqtl-a-ENSG00000005471	TRUE	reported	eqtl-a-ENSG00000005471	rs111500959	1.3341356829031e-15	2	1	TRUE	-0.0467676	63.8597279557279	ABCB4	ENSG00000005471
9	eqtl-a-ENSG00000005471	rs111748964	C	G	C	G	-0.227502	0.0435144	0.0419225	0.0673661	FALSE	TRUE	FALSE	KIRC	87173864	0.556605	0.0740177	outcome	TRUE	reported	380248	378749	1499	7	86803180	0.0296358	1.63117290922784e-14	29835	NA	NA	eqtl-a-ENSG00000005471	TRUE	reported	eqtl-a-ENSG00000005471	rs111748964	1.63117290922784e-14	2	1	TRUE	-0.0444009	58.9300931275846	ABCB4	ENSG00000005471
10	eqtl-a-ENSG00000005471	rs111778381	A	G	A	G	-0.158719	-0.035761	0.065759	0.0720777	FALSE	FALSE	FALSE	KIRC	87048337	0.617433	0.0715949	outcome	TRUE	reported	380248	378749	1499	7	86677653	0.0239753	3.58674085769951e-11	30159	NA	NA	eqtl-a-ENSG00000005471	TRUE	reported	eqtl-a-ENSG00000005471	rs111778381	3.58674085769951e-11	2	1	TRUE	-0.0380939	43.8257883298066	ABCB4	ENSG00000005471
11	eqtl-a-ENSG00000005471	rs112050772	T	A	T	A	-0.248336	0.0392938	0.0415573	0.0653446	FALSE	TRUE	FALSE	KIRC	87250407	0.600514	0.0750367	outcome	TRUE	reported	380248	378749	1499	7	86879723	0.0297487	6.94224601714119e-17	29836	NA	NA	eqtl-a-ENSG00000005471	TRUE	reported	eqtl-a-ENSG00000005471	rs112050772	6.94224601714119e-17	2	1	TRUE	-0.0482736	69.685653796825	ABCB4	ENSG00000005471
12	eqtl-a-ENSG00000005471	rs112090481	A	C	A	C	-0.208131	-0.054094	0.035784	0.0593145	FALSE	FALSE	FALSE	KIRC	87032859	0.490767	0.0785006	outcome	TRUE	reported	380248	378749	1499	7	86662175	0.0319936	7.73927003278055e-11	29136	NA	NA	eqtl-a-ENSG00000005471	TRUE	reported	eqtl-a-ENSG00000005471	rs112090481	7.73927003278055e-11	2	1	TRUE	-0.0380854	42.3201618807349	ABCB4	ENSG00000005471
13	eqtl-a-ENSG00000005471	rs112560687	C	T	C	T	-0.271601	0.0600402	0.0446908	0.0672532	FALSE	FALSE	FALSE	KIRC	87325921	0.416612	0.0739128	outcome	TRUE	reported	380248	378749	1499	7	86955237	0.0287138	3.10885165988056e-21	29834	NA	NA	eqtl-a-ENSG00000005471	TRUE	reported	eqtl-a-ENSG00000005471	rs112560687	3.10885165988056e-21	2	1	TRUE	-0.0546826	89.4708137056728	ABCB4	ENSG00000005471
14	eqtl-a-ENSG00000005471	rs112714763	A	T	A	T	-0.29203	0.077143	0.0531885	0.0711562	FALSE	TRUE	FALSE	KIRC	87339999	0.28353	0.0719333	outcome	TRUE	reported	380248	378749	1499	7	86969315	0.0264077	1.99159028905761e-28	30165	NA	NA	eqtl-a-ENSG00000005471	TRUE	reported	eqtl-a-ENSG00000005471	rs112714763	1.99159028905761e-28	2	1	TRUE	-0.0635449	122.290798757799	ABCB4	ENSG00000005471
15	eqtl-a-ENSG00000005471	rs112824254	A	G	A	G	-0.246445	0.0400156	0.0417996	0.065355	FALSE	FALSE	FALSE	KIRC	87305224	0.593886	0.0750461	outcome	TRUE	reported	380248	378749	1499	7	86934540	0.0296668	9.79941161095592e-17	29836	NA	NA	eqtl-a-ENSG00000005471	TRUE	reported	eqtl-a-ENSG00000005471	rs112824254	9.79941161095592e-17	2	1	TRUE	-0.0480388	69.0078688112233	ABCB4	ENSG00000005471
16	eqtl-a-ENSG00000005471	rs113154145	A	G	A	G	-0.138172	0.0516958	0.0568198	0.0825319	FALSE	FALSE	FALSE	KIRC	88189803	0.449959	0.0684274	outcome	TRUE	reported	380248	378749	1499	7	87819118	0.0256834	7.44852020192214e-08	25772	NA	NA	eqtl-a-ENSG00000005471	TRUE	reported	eqtl-a-ENSG00000005471	rs113154145	7.44852020192214e-08	2	1	TRUE	-0.033494	28.9424343310139	ABCB4	ENSG00000005471
17	eqtl-a-ENSG00000005471	rs113532794	G	T	G	T	-0.107294	0.020021	0.176003	0.195454	FALSE	FALSE	FALSE	KIRC	87262986	0.667477	0.0466024	outcome	TRUE	reported	380248	378749	1499	7	86892302	0.0156025	6.12068458870459e-12	31566	NA	NA	eqtl-a-ENSG00000005471	TRUE	reported	eqtl-a-ENSG00000005471	rs113532794	6.12068458870459e-12	2	1	TRUE	-0.0386777	47.2892569789521	ABCB4	ENSG00000005471
18	eqtl-a-ENSG00000005471	rs113841955	G	T	G	T	-0.227779	0.0433223	0.0426361	0.0673683	FALSE	FALSE	FALSE	KIRC	87161455	0.558294	0.0740074	outcome	TRUE	reported	380248	378749	1499	7	86790771	0.0293965	9.29180313823661e-15	29831	NA	NA	eqtl-a-ENSG00000005471	TRUE	reported	eqtl-a-ENSG00000005471	rs113841955	9.29180313823661e-15	2	1	TRUE	-0.044819	60.0393680960154	ABCB4	ENSG00000005471
19	eqtl-a-ENSG00000005471	rs117369264	A	G	A	G	-0.205852	-0.0766328	0.0202127	0.0313494	FALSE	FALSE	FALSE	KIRC	87249855	0.465496	0.105001	outcome	TRUE	reported	380248	378749	1499	7	86879171	0.0422573	1.10700606430562e-06	27363	NA	NA	eqtl-a-ENSG00000005471	TRUE	reported	eqtl-a-ENSG00000005471	rs117369264	1.10700606430562e-06	2	1	TRUE	-0.0294374	23.7304892613572	ABCB4	ENSG00000005471
20	eqtl-a-ENSG00000005471	rs117600803	C	T	C	T	-0.239875	-0.0461289	0.0139407	0.0118413	FALSE	FALSE	FALSE	KIRC	87347673	0.789494	0.172788	outcome	TRUE	reported	380248	378749	1499	7	86976989	0.0507232	2.25408350020241e-06	9630	NA	NA	eqtl-a-ENSG00000005471	TRUE	reported	eqtl-a-ENSG00000005471	rs117600803	2.25408350020241e-06	2	1	TRUE	-0.04814	22.3643709379367	ABCB4	ENSG00000005471
21	eqtl-a-ENSG00000005471	rs12535941	T	C	T	C	-0.136325	-0.0974821	0.0762524	0.109333	FALSE	FALSE	FALSE	KIRC	87010510	0.0978881	0.0588951	outcome	TRUE	reported	380248	378749	1499	7	86639826	0.0223961	1.14899992410026e-09	31684	NA	NA	eqtl-a-ENSG00000005471	TRUE	reported	eqtl-a-ENSG00000005471	rs12535941	1.14899992410026e-09	2	1	TRUE	-0.0341777	37.0515360048966	ABCB4	ENSG00000005471
22	eqtl-a-ENSG00000005471	rs12539936	A	G	A	G	-0.334238	0.0100006	0.177684	0.194721	FALSE	FALSE	FALSE	KIRC	87480701	0.829787	0.0465198	outcome	TRUE	reported	380248	378749	1499	7	87110017	0.0153142	1.33045441797808e-105	31684	NA	NA	eqtl-a-ENSG00000005471	TRUE	reported	eqtl-a-ENSG00000005471	rs12539936	1.33045441797808e-105	2	1	TRUE	-0.121707	476.346544035067	ABCB4	ENSG00000005471
23	eqtl-a-ENSG00000005471	rs12946510	T	C	T	C	-0.0804044	0.0317702	0.451707	0.519511	FALSE	FALSE	FALSE	KIRC	39756124	0.389228	0.0368984	outcome	TRUE	reported	380248	378749	1499	17	37912377	0.0119402	1.65044098565228e-11	31684	NA	NA	eqtl-a-ENSG00000005471	TRUE	reported	eqtl-a-ENSG00000005471	rs12946510	1.65044098565228e-11	2	1	TRUE	-0.0378052	45.3457331768033	ABCB4	ENSG00000005471
24	eqtl-a-ENSG00000005471	rs13226884	A	G	A	G	-0.12845	0.0362653	0.101488	0.0973016	FALSE	FALSE	FALSE	KIRC	87099952	0.55778	0.0618711	outcome	TRUE	reported	380248	378749	1499	7	86729268	0.0196798	6.70965206461879e-11	31684	NA	NA	eqtl-a-ENSG00000005471	TRUE	reported	eqtl-a-ENSG00000005471	rs13226884	6.70965206461879e-11	2	1	TRUE	-0.0366451	42.6016927827494	ABCB4	ENSG00000005471
25	eqtl-a-ENSG00000005471	rs13227722	T	C	T	C	0.0902762	0.0145754	0.809117	0.798613	FALSE	FALSE	FALSE	KIRC	87389215	0.750131	0.0457672	outcome	TRUE	reported	380248	378749	1499	7	87018531	0.0151254	2.39298513045373e-09	31565	NA	NA	eqtl-a-ENSG00000005471	TRUE	reported	eqtl-a-ENSG00000005471	rs13227722	2.39298513045373e-09	2	1	TRUE	0.0335762601665185	35.6231896297609	ABCB4	ENSG00000005471
26	eqtl-a-ENSG00000005471	rs1634993	A	C	A	C	-0.169893	-0.039158	0.056904	0.0726122	FALSE	FALSE	FALSE	KIRC	86993657	0.582345	0.0712011	outcome	TRUE	reported	380248	378749	1499	7	86622973	0.025652	3.51965422524766e-11	29836	NA	NA	eqtl-a-ENSG00000005471	TRUE	reported	eqtl-a-ENSG00000005471	rs1634993	3.51965422524766e-11	2	1	TRUE	-0.0383159	43.8640277909519	ABCB4	ENSG00000005471
27	eqtl-a-ENSG00000005471	rs17608771	G	A	G	A	0.112126	-0.0323512	0.0957142	0.0620152	FALSE	FALSE	FALSE	KIRC	86922085	0.666991	0.0751863	outcome	TRUE	reported	380248	378749	1499	7	86551401	0.0202083	2.88296918235385e-08	29131	NA	NA	eqtl-a-ENSG00000005471	TRUE	reported	eqtl-a-ENSG00000005471	rs17608771	2.88296918235385e-08	2	1	TRUE	0.032492593901105	30.7859881325671	ABCB4	ENSG00000005471
28	eqtl-a-ENSG00000005471	rs1767719	A	G	A	G	-0.157459	-0.0202076	0.0575355	0.0728772	FALSE	FALSE	FALSE	KIRC	86978151	0.776723	0.0712562	outcome	TRUE	reported	380248	378749	1499	7	86607467	0.0255246	6.87226661584248e-10	31563	NA	NA	eqtl-a-ENSG00000005471	TRUE	reported	eqtl-a-ENSG00000005471	rs1767719	6.87226661584248e-10	2	1	TRUE	-0.0347034	38.0554698329864	ABCB4	ENSG00000005471
29	eqtl-a-ENSG00000005471	rs17766292	A	G	A	G	0.0644782	0.0424512	0.619959	0.6119	FALSE	FALSE	FALSE	KIRC	87200874	0.262494	0.0378854	outcome	TRUE	reported	380248	378749	1499	7	86830190	0.0122496	1.41110717465263e-07	31684	NA	NA	eqtl-a-ENSG00000005471	TRUE	reported	eqtl-a-ENSG00000005471	rs17766292	1.41110717465263e-07	2	1	TRUE	0.0295593504404676	27.7065209143651	ABCB4	ENSG00000005471
30	eqtl-a-ENSG00000005471	rs183342289	T	C	T	C	-0.241351	0.128566	0.0230769	0.0426196	FALSE	FALSE	FALSE	KIRC	88079235	0.169759	0.0936398	outcome	TRUE	reported	380248	378749	1499	7	87708550	0.0395872	1.08210648563063e-09	29060	NA	NA	eqtl-a-ENSG00000005471	TRUE	reported	eqtl-a-ENSG00000005471	rs183342289	1.08210648563063e-09	2	1	TRUE	-0.0357424	37.1696639562637	ABCB4	ENSG00000005471
31	eqtl-a-ENSG00000005471	rs2032588	A	G	A	G	-0.272581	0.0495096	0.0566361	0.0889323	FALSE	FALSE	FALSE	KIRC	87550127	0.44652	0.0650391	outcome	TRUE	reported	380248	378749	1499	7	87179443	0.0256465	2.19836600699139e-26	30165	NA	NA	eqtl-a-ENSG00000005471	TRUE	reported	eqtl-a-ENSG00000005471	rs2032588	2.19836600699139e-26	2	1	TRUE	-0.0610827	112.962670564857	ABCB4	ENSG00000005471
32	eqtl-a-ENSG00000005471	rs2621416	C	T	C	T	-0.0594377	-0.055392	0.297516	0.370489	FALSE	FALSE	FALSE	KIRC	32774091	0.147518	0.0382448	outcome	TRUE	reported	380248	378749	1499	6	32741868	0.0130092	4.90060839884773e-06	30603	NA	NA	eqtl-a-ENSG00000005471	TRUE	reported	eqtl-a-ENSG00000005471	rs2621416	4.90060839884773e-06	2	1	TRUE	-0.0261093	20.8748234123356	ABCB4	ENSG00000005471
33	eqtl-a-ENSG00000005471	rs28381817	C	T	C	T	-0.192556	0.0620909	0.0597483	0.0886389	FALSE	FALSE	FALSE	KIRC	87595264	0.341901	0.0653302	outcome	TRUE	reported	380248	378749	1499	7	87224580	0.0250584	1.53709248761617e-14	29469	NA	NA	eqtl-a-ENSG00000005471	TRUE	reported	eqtl-a-ENSG00000005471	rs28381817	1.53709248761617e-14	2	1	TRUE	-0.0447199	59.0483051156397	ABCB4	ENSG00000005471
34	eqtl-a-ENSG00000005471	rs28381863	C	T	C	T	-0.231191	0.0677808	0.0664607	0.0984259	FALSE	FALSE	FALSE	KIRC	87561838	0.276105	0.0622351	outcome	TRUE	reported	380248	378749	1499	7	87191154	0.023815	2.79318692225398e-22	30165	NA	NA	eqtl-a-ENSG00000005471	TRUE	reported	eqtl-a-ENSG00000005471	rs28381863	2.79318692225398e-22	2	1	TRUE	-0.0558092	94.2411713163205	ABCB4	ENSG00000005471
35	eqtl-a-ENSG00000005471	rs31659	T	C	T	C	0.11909	0.0309461	0.8951	0.868954	FALSE	FALSE	FALSE	KIRC	87411313	0.568688	0.0542929	outcome	TRUE	reported	380248	378749	1499	7	87040629	0.0193973	8.27294238892203e-10	31300	NA	NA	eqtl-a-ENSG00000005471	TRUE	reported	eqtl-a-ENSG00000005471	rs31659	8.27294238892203e-10	2	1	TRUE	0.0346828163542502	37.6936353769143	ABCB4	ENSG00000005471
36	eqtl-a-ENSG00000005471	rs31668	A	G	A	G	0.259558	0.0960394	0.920768	0.930774	FALSE	FALSE	FALSE	KIRC	87423890	0.186406	0.0726863	outcome	TRUE	reported	380248	378749	1499	7	87053206	0.0219268	2.49516919474159e-32	31346	NA	NA	eqtl-a-ENSG00000005471	TRUE	reported	eqtl-a-ENSG00000005471	rs31668	2.49516919474159e-32	2	1	TRUE	0.0667134413293905	140.125871784696	ABCB4	ENSG00000005471
37	eqtl-a-ENSG00000005471	rs31674	C	T	C	T	0.243534	0.0182939	0.788493	0.783614	FALSE	FALSE	FALSE	KIRC	87439148	0.683971	0.0449428	outcome	TRUE	reported	380248	378749	1499	7	87068464	0.0144293	6.53280958830392e-64	31684	NA	NA	eqtl-a-ENSG00000005471	TRUE	reported	eqtl-a-ENSG00000005471	rs31674	6.53280958830392e-64	2	1	TRUE	0.0943983410290787	284.858168841221	ABCB4	ENSG00000005471
38	eqtl-a-ENSG00000005471	rs34800935	C	T	C	T	0.0630488	-0.0559958	0.301489	0.313487	FALSE	FALSE	FALSE	KIRC	87627286	0.159928	0.0398458	outcome	TRUE	reported	380248	378749	1499	7	87256602	0.0129586	1.14229953498739e-06	28250	NA	NA	eqtl-a-ENSG00000005471	TRUE	reported	eqtl-a-ENSG00000005471	rs34800935	1.14229953498739e-06	2	1	TRUE	0.0289362996268506	23.6721378552068	ABCB4	ENSG00000005471
39	eqtl-a-ENSG00000005471	rs3763317	T	C	T	C	-0.0624118	-0.0967325	0.465049	0.522692	FALSE	FALSE	FALSE	KIRC	32409011	0.00850922	0.0367641	outcome	TRUE	reported	380248	378749	1499	6	32376788	0.0119211	1.64630387343945e-07	29827	NA	NA	eqtl-a-ENSG00000005471	TRUE	reported	eqtl-a-ENSG00000005471	rs3763317	1.64630387343945e-07	2	1	TRUE	-0.0303013	27.4094773316868	ABCB4	ENSG00000005471
40	eqtl-a-ENSG00000005471	rs4065275	G	A	G	A	0.0715978	0.0124853	0.516476	0.463174	FALSE	FALSE	FALSE	KIRC	39924612	0.736033	0.037036	outcome	TRUE	reported	380248	378749	1499	17	38080865	0.0118947	1.75061239857916e-09	28533	NA	NA	eqtl-a-ENSG00000005471	TRUE	reported	eqtl-a-ENSG00000005471	rs4065275	1.75061239857916e-09	2	1	TRUE	0.0356132906314109	36.2320051706461	ABCB4	ENSG00000005471
41	eqtl-a-ENSG00000005471	rs4148813	G	A	G	A	-0.336445	0.0145945	0.172114	0.197017	FALSE	FALSE	FALSE	KIRC	87463060	0.752596	0.0462999	outcome	TRUE	reported	380248	378749	1499	7	87092376	0.0155107	2.47172414501613e-104	31569	NA	NA	eqtl-a-ENSG00000005471	TRUE	reported	eqtl-a-ENSG00000005471	rs4148813	2.47172414501613e-104	2	1	TRUE	-0.121186	470.506211223646	ABCB4	ENSG00000005471
42	eqtl-a-ENSG00000005471	rs45493392	G	A	G	A	-0.344006	0.0160946	0.16734	0.198194	FALSE	FALSE	FALSE	KIRC	87450564	0.727788	0.0462397	outcome	TRUE	reported	380248	378749	1499	7	87079880	0.0156794	1.07894672222983e-106	31569	NA	NA	eqtl-a-ENSG00000005471	TRUE	reported	eqtl-a-ENSG00000005471	rs45493392	1.07894672222983e-106	2	1	TRUE	-0.122556	481.363499251252	ABCB4	ENSG00000005471
43	eqtl-a-ENSG00000005471	rs45501291	G	A	G	A	-0.325049	0.0720092	0.0549753	0.0736943	FALSE	FALSE	FALSE	KIRC	87400394	0.312327	0.0712715	outcome	TRUE	reported	380248	378749	1499	7	87029710	0.0259682	5.99652985155339e-36	30159	NA	NA	eqtl-a-ENSG00000005471	TRUE	reported	eqtl-a-ENSG00000005471	rs45501291	5.99652985155339e-36	2	1	TRUE	-0.0718932	156.680148303256	ABCB4	ENSG00000005471
44	eqtl-a-ENSG00000005471	rs4810485	G	T	G	T	-0.0670501	-0.0163301	0.746826	0.72897	FALSE	FALSE	FALSE	KIRC	46119308	0.694119	0.0415236	outcome	TRUE	reported	380248	378749	1499	20	44747947	0.0136759	9.44800251038827e-07	31300	NA	NA	eqtl-a-ENSG00000005471	TRUE	reported	eqtl-a-ENSG00000005471	rs4810485	9.44800251038827e-07	2	1	TRUE	-0.0277025	24.0373743333684	ABCB4	ENSG00000005471
45	eqtl-a-ENSG00000005471	rs4947311	T	C	T	C	-0.0583326	-0.00612567	0.621411	0.691714	FALSE	FALSE	FALSE	KIRC	31358389	0.877781	0.0398332	outcome	TRUE	reported	380248	378749	1499	6	31326166	0.0122609	1.9591153165936e-06	27822	NA	NA	eqtl-a-ENSG00000005471	TRUE	reported	eqtl-a-ENSG00000005471	rs4947311	1.9591153165936e-06	2	1	TRUE	-0.0285124	22.634868084893	ABCB4	ENSG00000005471
46	eqtl-a-ENSG00000005471	rs55837019	T	G	T	G	-0.154502	0.0441125	0.0568579	0.0829534	FALSE	FALSE	FALSE	KIRC	88165453	0.517221	0.0681132	outcome	TRUE	reported	380248	378749	1499	7	87794768	0.0256687	1.7527904567597e-09	26233	NA	NA	eqtl-a-ENSG00000005471	TRUE	reported	eqtl-a-ENSG00000005471	rs55837019	1.7527904567597e-09	2	1	TRUE	-0.0371384	36.2293433703397	ABCB4	ENSG00000005471
47	eqtl-a-ENSG00000005471	rs59716545	G	T	G	T	-0.0757089	0.00817257	0.436905	0.517865	FALSE	FALSE	FALSE	KIRC	39875604	0.824693	0.0368943	outcome	TRUE	reported	380248	378749	1499	17	38031857	0.0119825	2.64289555183713e-10	30732	NA	NA	eqtl-a-ENSG00000005471	TRUE	reported	eqtl-a-ENSG00000005471	rs59716545	2.64289555183713e-10	2	1	TRUE	-0.0360194	39.9207780573319	ABCB4	ENSG00000005471
48	eqtl-a-ENSG00000005471	rs60916103	G	A	G	A	-0.379917	0.00758324	0.126288	0.13529	FALSE	FALSE	FALSE	KIRC	87499040	0.888034	0.053861	outcome	TRUE	reported	380248	378749	1499	7	87128356	0.0176299	5.32108259266793e-103	31566	NA	NA	eqtl-a-ENSG00000005471	TRUE	reported	eqtl-a-ENSG00000005471	rs60916103	5.32108259266793e-103	2	1	TRUE	-0.120412	464.384543775636	ABCB4	ENSG00000005471
49	eqtl-a-ENSG00000005471	rs62486485	C	T	C	T	0.130903	0.029938	0.0670395	0.0420943	FALSE	FALSE	FALSE	KIRC	87214340	0.741963	0.0909263	outcome	TRUE	reported	380248	378749	1499	7	86843656	0.0237729	3.66251995842694e-08	25906	NA	NA	eqtl-a-ENSG00000005471	TRUE	reported	eqtl-a-ENSG00000005471	rs62486485	3.66251995842694e-08	2	1	TRUE	0.0341924326580328	30.3203962285799	ABCB4	ENSG00000005471
50	eqtl-a-ENSG00000005471	rs7216389	T	C	T	C	0.0766503	0.0138258	0.505453	0.448043	FALSE	FALSE	FALSE	KIRC	39913696	0.709712	0.0371418	outcome	TRUE	reported	380248	378749	1499	17	38069949	0.0118867	1.12891176738947e-10	31300	NA	NA	eqtl-a-ENSG00000005471	TRUE	reported	eqtl-a-ENSG00000005471	rs7216389	1.12891176738947e-10	2	1	TRUE	0.0364255365209121	41.5819750939246	ABCB4	ENSG00000005471
51	eqtl-a-ENSG00000005471	rs73194586	C	T	C	T	-0.124619	-0.00295244	0.0523926	0.0683401	FALSE	FALSE	FALSE	KIRC	86837941	0.968037	0.0736811	outcome	TRUE	reported	380248	378749	1499	7	86467257	0.0266907	3.02670434355079e-06	29525	NA	NA	eqtl-a-ENSG00000005471	TRUE	reported	eqtl-a-ENSG00000005471	rs73194586	3.02670434355079e-06	2	1	TRUE	-0.0271634	21.7996035779449	ABCB4	ENSG00000005471
52	eqtl-a-ENSG00000005471	rs73194600	A	C	A	C	-0.13752	-0.00357757	0.0527262	0.0688306	FALSE	FALSE	FALSE	KIRC	86862078	0.961079	0.0733124	outcome	TRUE	reported	380248	378749	1499	7	86491394	0.0266062	2.35602557244829e-07	29835	NA	NA	eqtl-a-ENSG00000005471	TRUE	reported	eqtl-a-ENSG00000005471	rs73194600	2.35602557244829e-07	2	1	TRUE	-0.0299116	26.7156671906038	ABCB4	ENSG00000005471
53	eqtl-a-ENSG00000005471	rs73196425	T	C	T	C	-0.316941	0.0732306	0.0544483	0.073621	FALSE	FALSE	FALSE	KIRC	87378907	0.304319	0.0712903	outcome	TRUE	reported	380248	378749	1499	7	87008223	0.0260947	6.02420857574623e-34	30163	NA	NA	eqtl-a-ENSG00000005471	TRUE	reported	eqtl-a-ENSG00000005471	rs73196425	6.02420857574623e-34	2	1	TRUE	-0.069766	147.520450881654	ABCB4	ENSG00000005471
54	eqtl-a-ENSG00000005471	rs73196605	G	A	G	A	-0.197015	-0.031265	0.0385701	0.0616421	FALSE	FALSE	FALSE	KIRC	86884745	0.684742	0.0770072	outcome	TRUE	reported	380248	378749	1499	7	86514061	0.0308627	1.72969687186123e-10	29524	NA	NA	eqtl-a-ENSG00000005471	TRUE	reported	eqtl-a-ENSG00000005471	rs73196605	1.72969687186123e-10	2	1	TRUE	-0.0371273	40.7502944704375	ABCB4	ENSG00000005471
55	eqtl-a-ENSG00000005471	rs73196633	C	A	C	A	0.109153	-0.0500085	0.0903765	0.061	FALSE	FALSE	FALSE	KIRC	86944795	0.509848	0.075877	outcome	TRUE	reported	380248	378749	1499	7	86574111	0.0207377	1.41419728779119e-07	28289	NA	NA	eqtl-a-ENSG00000005471	TRUE	reported	eqtl-a-ENSG00000005471	rs73196633	1.41419728779119e-07	2	1	TRUE	0.0312801676672876	27.7044911600527	ABCB4	ENSG00000005471
56	eqtl-a-ENSG00000005471	rs73200311	A	C	A	C	-0.261275	0.0307085	0.0419939	0.0670272	FALSE	FALSE	FALSE	KIRC	87577930	0.679113	0.0742336	outcome	TRUE	reported	380248	378749	1499	7	87207246	0.0295918	1.05244643173406e-18	29138	NA	NA	eqtl-a-ENSG00000005471	TRUE	reported	eqtl-a-ENSG00000005471	rs73200311	1.05244643173406e-18	2	1	TRUE	-0.0516573	77.9566102539253	ABCB4	ENSG00000005471
57	eqtl-a-ENSG00000005471	rs73200333	C	G	C	G	-0.190695	0.0704808	0.0571247	0.0863859	FALSE	TRUE	FALSE	KIRC	87770318	0.285864	0.0660402	outcome	TRUE	reported	380248	378749	1499	7	87399634	0.0255949	9.29180313823661e-14	29469	NA	NA	eqtl-a-ENSG00000005471	TRUE	reported	eqtl-a-ENSG00000005471	rs73200333	9.29180313823661e-14	2	1	TRUE	-0.043362	55.5100652609621	ABCB4	ENSG00000005471
58	eqtl-a-ENSG00000005471	rs73200335	A	G	A	G	-0.18648	0.0759219	0.0569255	0.0853761	FALSE	FALSE	FALSE	KIRC	87785071	0.253147	0.0664384	outcome	TRUE	reported	380248	378749	1499	7	87414386	0.0256393	3.51075077184831e-13	29853	NA	NA	eqtl-a-ENSG00000005471	TRUE	reported	eqtl-a-ENSG00000005471	rs73200335	3.51075077184831e-13	2	1	TRUE	-0.0420593	52.8995762417646	ABCB4	ENSG00000005471
59	eqtl-a-ENSG00000005471	rs73200338	T	C	T	C	-0.254966	0.0375098	0.0399557	0.0709571	FALSE	FALSE	FALSE	KIRC	87799348	0.603063	0.0721344	outcome	TRUE	reported	380248	378749	1499	7	87428663	0.0303126	4.05882194661918e-17	29452	NA	NA	eqtl-a-ENSG00000005471	TRUE	reported	eqtl-a-ENSG00000005471	rs73200338	4.05882194661918e-17	2	1	TRUE	-0.0489548	70.7486510951149	ABCB4	ENSG00000005471
60	eqtl-a-ENSG00000005471	rs73200349	T	C	T	C	-0.191959	0.0673898	0.0588376	0.0869043	FALSE	FALSE	FALSE	KIRC	87863839	0.306457	0.065895	outcome	TRUE	reported	380248	378749	1499	7	87493154	0.0252404	2.84446110744792e-14	30161	NA	NA	eqtl-a-ENSG00000005471	TRUE	reported	eqtl-a-ENSG00000005471	rs73200349	2.84446110744792e-14	2	1	TRUE	-0.043751	57.8394948536296	ABCB4	ENSG00000005471
61	eqtl-a-ENSG00000005471	rs73200354	G	C	G	C	-0.192321	0.065489	0.0589426	0.0868193	FALSE	TRUE	FALSE	KIRC	87875096	0.320813	0.0659646	outcome	TRUE	reported	380248	378749	1499	7	87504411	0.0252191	2.41768658092577e-14	29777	NA	NA	eqtl-a-ENSG00000005471	TRUE	reported	eqtl-a-ENSG00000005471	rs73200354	2.41768658092577e-14	2	1	TRUE	-0.0441517	58.1559627254428	ABCB4	ENSG00000005471
62	eqtl-a-ENSG00000005471	rs73200358	A	G	A	G	-0.177749	0.0665438	0.0568838	0.0869928	FALSE	FALSE	FALSE	KIRC	87935452	0.313785	0.0660608	outcome	TRUE	reported	380248	378749	1499	7	87564767	0.0256525	4.23252956091983e-12	29836	NA	NA	eqtl-a-ENSG00000005471	TRUE	reported	eqtl-a-ENSG00000005471	rs73200358	4.23252956091983e-12	2	1	TRUE	-0.0400841	48.0125684849101	ABCB4	ENSG00000005471
63	eqtl-a-ENSG00000005471	rs73200363	C	T	C	T	-0.232233	0.0710996	0.0427455	0.0687008	FALSE	FALSE	FALSE	KIRC	87947656	0.334121	0.0736138	outcome	TRUE	reported	380248	378749	1499	7	87576971	0.0293579	2.56566529703487e-15	29136	NA	NA	eqtl-a-ENSG00000005471	TRUE	reported	eqtl-a-ENSG00000005471	rs73200363	2.56566529703487e-15	2	1	TRUE	-0.0462949	62.5745724974872	ABCB4	ENSG00000005471
64	eqtl-a-ENSG00000005471	rs73202304	G	A	G	A	-0.15045	0.0594363	0.0707362	0.135633	FALSE	FALSE	FALSE	KIRC	87996547	0.277411	0.0547219	outcome	TRUE	reported	380248	378749	1499	7	87625862	0.0231797	8.53886210214843e-11	29836	NA	NA	eqtl-a-ENSG00000005471	TRUE	reported	eqtl-a-ENSG00000005471	rs73202304	8.53886210214843e-11	2	1	TRUE	-0.0375511	42.1277982969074	ABCB4	ENSG00000005471
65	eqtl-a-ENSG00000005471	rs73202325	C	G	C	G	-0.213542	0.0745866	0.0430518	0.0686806	FALSE	TRUE	FALSE	KIRC	88020830	0.311024	0.073624	outcome	TRUE	reported	380248	378749	1499	7	87650145	0.0292676	2.9559698495046e-13	28628	NA	NA	eqtl-a-ENSG00000005471	TRUE	reported	eqtl-a-ENSG00000005471	rs73202325	2.9559698495046e-13	2	1	TRUE	-0.0430836	53.2344032522729	ABCB4	ENSG00000005471
66	eqtl-a-ENSG00000005471	rs73202341	C	A	C	A	-0.233214	0.0800676	0.0385303	0.0636859	FALSE	FALSE	FALSE	KIRC	88048209	0.295998	0.0766157	outcome	TRUE	reported	380248	378749	1499	7	87677524	0.0308602	4.11812950513852e-14	29134	NA	NA	eqtl-a-ENSG00000005471	TRUE	reported	eqtl-a-ENSG00000005471	rs73202341	4.11812950513852e-14	2	1	TRUE	-0.0442329	57.1099477838789	ABCB4	ENSG00000005471
67	eqtl-a-ENSG00000005471	rs73204110	T	C	T	C	-0.208963	0.055368	0.0431241	0.0690865	FALSE	FALSE	FALSE	KIRC	88136776	0.453009	0.073784	outcome	TRUE	reported	380248	378749	1499	7	87766091	0.0292464	8.99911910870052e-13	26374	NA	NA	eqtl-a-ENSG00000005471	TRUE	reported	eqtl-a-ENSG00000005471	rs73204110	8.99911910870052e-13	2	1	TRUE	-0.0439547	51.0497898086095	ABCB4	ENSG00000005471
68	eqtl-a-ENSG00000005471	rs73206347	G	A	G	A	-0.158637	-0.0618295	0.0362635	0.0664719	FALSE	FALSE	FALSE	KIRC	86522053	0.404852	0.0742262	outcome	TRUE	reported	380248	378749	1499	7	86151369	0.0318089	6.12604242326336e-07	28942	NA	NA	eqtl-a-ENSG00000005471	TRUE	reported	eqtl-a-ENSG00000005471	rs73206347	6.12604242326336e-07	2	1	TRUE	-0.0293035	24.8720553189073	ABCB4	ENSG00000005471
69	eqtl-a-ENSG00000005471	rs75208930	C	T	C	T	-0.123582	0.00218152	0.0800383	0.074933	FALSE	FALSE	FALSE	KIRC	87076778	0.975156	0.070051	outcome	TRUE	reported	380248	378749	1499	7	86706094	0.021909	1.6925830990501e-08	30163	NA	NA	eqtl-a-ENSG00000005471	TRUE	reported	eqtl-a-ENSG00000005471	rs75208930	1.6925830990501e-08	2	1	TRUE	-0.0324624	31.8174469031454	ABCB4	ENSG00000005471
70	eqtl-a-ENSG00000005471	rs75244085	T	C	T	C	-0.281534	-0.144552	0.0132585	0.00483709	FALSE	FALSE	FALSE	KIRC	87594375	0.566245	0.252012	outcome	TRUE	reported	380248	378749	1499	7	87223691	0.0519809	6.08793490344402e-08	1961	NA	NA	eqtl-a-ENSG00000005471	TRUE	reported	eqtl-a-ENSG00000005471	rs75244085	6.08793490344402e-08	2	1	TRUE	-0.121463	29.3341907881566	ABCB4	ENSG00000005471
71	eqtl-a-ENSG00000005471	rs75327002	C	T	C	T	-0.275535	-0.147768	0.0135135	0.00482819	FALSE	FALSE	FALSE	KIRC	87818637	0.557884	0.25217	outcome	TRUE	reported	380248	378749	1499	7	87447952	0.0514962	8.75669049799081e-08	1961	NA	NA	eqtl-a-ENSG00000005471	TRUE	reported	eqtl-a-ENSG00000005471	rs75327002	8.75669049799081e-08	2	1	TRUE	-0.120015	28.6288023847124	ABCB4	ENSG00000005471
72	eqtl-a-ENSG00000005471	rs75462222	A	G	A	G	-0.135264	0.00121668	0.0798263	0.0750478	FALSE	FALSE	FALSE	KIRC	87110246	0.986203	0.0703586	outcome	TRUE	reported	380248	378749	1499	7	86739562	0.0219307	6.91592062227305e-10	29835	NA	NA	eqtl-a-ENSG00000005471	TRUE	reported	eqtl-a-ENSG00000005471	rs75462222	6.91592062227305e-10	2	1	TRUE	-0.0356865	38.041660397085	ABCB4	ENSG00000005471
73	eqtl-a-ENSG00000005471	rs77491588	C	A	C	A	-0.184746	0.0671861	0.0584568	0.0869755	FALSE	FALSE	FALSE	KIRC	87904753	0.307573	0.0658475	outcome	TRUE	reported	380248	378749	1499	7	87534068	0.0253215	2.96005649507582e-13	29777	NA	NA	eqtl-a-ENSG00000005471	TRUE	reported	eqtl-a-ENSG00000005471	rs77491588	2.96005649507582e-13	2	1	TRUE	-0.0422447	53.2318	ABCB4	ENSG00000005471
74	eqtl-a-ENSG00000005471	rs7778976	A	G	A	G	0.0753588	0.0125624	0.671051	0.671929	FALSE	FALSE	FALSE	KIRC	87315326	0.749435	0.0393331	outcome	TRUE	reported	380248	378749	1499	7	86944642	0.0126519	2.57851700576918e-09	23856	NA	NA	eqtl-a-ENSG00000005471	TRUE	reported	eqtl-a-ENSG00000005471	rs7778976	2.57851700576918e-09	2	1	TRUE	0.0385367331283159	35.4777808897989	ABCB4	ENSG00000005471
75	eqtl-a-ENSG00000005471	rs7810499	C	T	C	T	-0.177591	0.0672653	0.0602742	0.0870075	FALSE	FALSE	FALSE	KIRC	87657130	0.306931	0.0658377	outcome	TRUE	reported	380248	378749	1499	7	87286446	0.0249633	1.12564125057611e-12	27398	NA	NA	eqtl-a-ENSG00000005471	TRUE	reported	eqtl-a-ENSG00000005471	rs7810499	1.12564125057611e-12	2	1	TRUE	-0.0429412	50.610183682732	ABCB4	ENSG00000005471
76	eqtl-a-ENSG00000005471	rs78826119	T	C	T	C	-0.245707	0.0392266	0.0417188	0.0653509	FALSE	FALSE	FALSE	KIRC	87278199	0.601135	0.075036	outcome	TRUE	reported	380248	378749	1499	7	86907515	0.0296949	1.28884294916022e-16	29836	NA	NA	eqtl-a-ENSG00000005471	TRUE	reported	eqtl-a-ENSG00000005471	rs78826119	1.28884294916022e-16	2	1	TRUE	-0.04785	68.4654275468889	ABCB4	ENSG00000005471
77	eqtl-a-ENSG00000005471	rs78905882	G	A	G	A	-0.271374	0.0119649	0.0151031	0.0130475	FALSE	FALSE	FALSE	KIRC	87892385	0.941794	0.163868	outcome	TRUE	reported	380248	378749	1499	7	87521700	0.0487461	2.58868972550567e-08	21661	NA	NA	eqtl-a-ENSG00000005471	TRUE	reported	eqtl-a-ENSG00000005471	rs78905882	2.58868972550567e-08	2	1	TRUE	-0.0378006	30.9925080050589	ABCB4	ENSG00000005471
78	eqtl-a-ENSG00000005471	rs78996140	G	A	G	A	-0.253262	0.0376121	0.0400947	0.0715589	FALSE	FALSE	FALSE	KIRC	87830991	0.600642	0.0718506	outcome	TRUE	reported	380248	378749	1499	7	87460306	0.030263	5.82103217770872e-17	29143	NA	NA	eqtl-a-ENSG00000005471	TRUE	reported	eqtl-a-ENSG00000005471	rs78996140	5.82103217770872e-17	2	1	TRUE	-0.0489649	70.0351573327682	ABCB4	ENSG00000005471
79	eqtl-a-ENSG00000005471	rs80149410	G	A	G	A	-0.299414	-0.145357	0.0130036	0.00483146	FALSE	FALSE	FALSE	KIRC	87670046	0.564136	0.252047	outcome	TRUE	reported	380248	378749	1499	7	87299362	0.0524753	1.15800384123579e-08	1961	NA	NA	eqtl-a-ENSG00000005471	TRUE	reported	eqtl-a-ENSG00000005471	rs80149410	1.15800384123579e-08	2	1	TRUE	-0.127856	32.5562478594402	ABCB4	ENSG00000005471
80	eqtl-a-ENSG00000005471	rs80157542	A	G	A	G	-0.246724	0.0393747	0.0417794	0.0653471	FALSE	FALSE	FALSE	KIRC	87292056	0.599773	0.0750384	outcome	TRUE	reported	380248	378749	1499	7	86921372	0.0296736	9.20661537501967e-17	29836	NA	NA	eqtl-a-ENSG00000005471	TRUE	reported	eqtl-a-ENSG00000005471	rs80157542	9.20661537501967e-17	2	1	TRUE	-0.048082	69.1325089601486	ABCB4	ENSG00000005471
81	eqtl-a-ENSG00000005471	rs802025	T	C	T	C	-0.293062	0.0776997	0.053607	0.0711598	FALSE	FALSE	FALSE	KIRC	87357316	0.280193	0.0719518	outcome	TRUE	reported	380248	378749	1499	7	86986632	0.0263086	8.04822297588501e-29	30165	NA	NA	eqtl-a-ENSG00000005471	TRUE	reported	eqtl-a-ENSG00000005471	rs802025	8.04822297588501e-29	2	1	TRUE	-0.0640078	124.086216405803	ABCB4	ENSG00000005471
82	eqtl-a-ENSG00000005471	rs80351204	A	G	A	G	-0.324501	-0.216992	0.0129886	0.00541993	FALSE	FALSE	FALSE	KIRC	87528799	0.365864	0.23997	outcome	TRUE	reported	380248	378749	1499	7	87158115	0.0524946	6.33752958894705e-10	9117	NA	NA	eqtl-a-ENSG00000005471	TRUE	reported	eqtl-a-ENSG00000005471	rs80351204	6.33752958894705e-10	2	1	TRUE	-0.0646122	38.2122682060056	ABCB4	ENSG00000005471
83	eqtl-a-ENSG00000005471	rs9275406	T	G	T	G	-0.0764577	-0.0628249	0.25806	0.435646	FALSE	FALSE	FALSE	KIRC	32702178	0.0939745	0.037512	outcome	TRUE	reported	380248	378749	1499	6	32669955	0.0135867	1.82730061336689e-08	29827	NA	NA	eqtl-a-ENSG00000005471	TRUE	reported	eqtl-a-ENSG00000005471	rs9275406	1.82730061336689e-08	2	1	TRUE	-0.0325677	31.6675515845482	ABCB4	ENSG00000005471
84	eqtl-a-ENSG00000005471	rs9303277	T	C	T	C	-0.079749	0.00561614	0.500686	0.571654	FALSE	FALSE	FALSE	KIRC	39820216	0.880039	0.0372128	outcome	TRUE	reported	380248	378749	1499	17	37976469	0.0118846	1.9435691636477e-11	31300	NA	NA	eqtl-a-ENSG00000005471	TRUE	reported	eqtl-a-ENSG00000005471	rs9303277	1.9435691636477e-11	2	1	TRUE	-0.0379027	45.0278648061601	ABCB4	ENSG00000005471
85	eqtl-a-ENSG00000005844	rs1052352	T	C	T	C	-0.0865397	-0.0177508	0.518037	0.481326	FALSE	FALSE	FALSE	KIRC	31183958	0.630936	0.0369492	outcome	TRUE	reported	380248	378749	1499	16	31195279	0.011889	3.36821650760631e-13	31355	NA	NA	eqtl-a-ENSG00000005844	TRUE	reported	eqtl-a-ENSG00000005844	rs1052352	3.36821650760631e-13	2	1	TRUE	-0.0410737	52.9834356935163	ITGAL	ENSG00000005844
86	eqtl-a-ENSG00000005844	rs11150585	G	A	G	A	-0.123583	-0.0254981	0.563135	0.607682	FALSE	FALSE	FALSE	KIRC	30172965	0.499383	0.0377492	outcome	TRUE	reported	380248	378749	1499	16	30184286	0.0119544	4.74351196085698e-25	27820	NA	NA	eqtl-a-ENSG00000005844	TRUE	reported	eqtl-a-ENSG00000005844	rs11150585	4.74351196085698e-25	2	1	TRUE	-0.0618636	106.871498840355	ITGAL	ENSG00000005844
87	eqtl-a-ENSG00000005844	rs11150602	G	A	G	A	-0.0841538	-0.0785016	0.370018	0.428236	FALSE	FALSE	FALSE	KIRC	30982502	0.0354617	0.0373275	outcome	TRUE	reported	380248	378749	1499	16	30993823	0.012307	8.02971257669863e-12	27155	NA	NA	eqtl-a-ENSG00000005844	TRUE	reported	eqtl-a-ENSG00000005844	rs11150602	8.02971257669863e-12	2	1	TRUE	-0.0414609	46.7566149400039	ITGAL	ENSG00000005844
88	eqtl-a-ENSG00000005844	rs112265026	C	T	C	T	-0.119595	0.0706146	0.0598332	0.0783547	FALSE	FALSE	FALSE	KIRC	29797860	0.311233	0.0697334	outcome	TRUE	reported	380248	378749	1499	16	29809181	0.0250739	1.84408102876581e-06	21621	NA	NA	eqtl-a-ENSG00000005844	TRUE	reported	eqtl-a-ENSG00000005844	rs112265026	1.84408102876581e-06	2	1	TRUE	-0.0324224	22.7500453832536	ITGAL	ENSG00000005844
89	eqtl-a-ENSG00000005844	rs112691371	T	C	T	C	0.120877	-0.0547085	0.0981691	0.0633921	FALSE	FALSE	FALSE	KIRC	30856895	0.4619	0.0743603	outcome	TRUE	reported	380248	378749	1499	16	30868216	0.0199771	1.44311187366504e-09	31565	NA	NA	eqtl-a-ENSG00000005844	TRUE	reported	eqtl-a-ENSG00000005844	rs112691371	1.44311187366504e-09	2	1	TRUE	0.0340384954043056	36.6119161112575	ITGAL	ENSG00000005844
90	eqtl-a-ENSG00000005844	rs112750937	C	G	C	G	0.105031	-0.048241	0.0947913	0.0642854	FALSE	TRUE	FALSE	KIRC	30611621	0.51523	0.0741353	outcome	TRUE	reported	380248	378749	1499	16	30622942	0.020299	2.29128968505377e-07	11257	NA	NA	eqtl-a-ENSG00000005844	TRUE	reported	eqtl-a-ENSG00000005844	rs112750937	2.29128968505377e-07	2	1	TRUE	0.0487140448639234	26.7723018993055	ITGAL	ENSG00000005844
91	eqtl-a-ENSG00000005844	rs112766425	G	A	G	A	0.14945	-0.144234	0.0598097	0.0316632	FALSE	FALSE	FALSE	KIRC	31138434	0.174284	0.106166	outcome	TRUE	reported	380248	378749	1499	16	31149755	0.0250671	2.4917243712539e-09	29143	NA	NA	eqtl-a-ENSG00000005844	TRUE	reported	eqtl-a-ENSG00000005844	rs112766425	2.4917243712539e-09	2	1	TRUE	0.0349039751935067	35.5454201207041	ITGAL	ENSG00000005844
92	eqtl-a-ENSG00000005844	rs113711981	A	G	A	G	0.103026	-0.0825706	0.0840012	0.0694756	FALSE	FALSE	FALSE	KIRC	30560775	0.263057	0.0737768	outcome	TRUE	reported	380248	378749	1499	16	30572096	0.0214387	1.5444007362861e-06	30902	NA	NA	eqtl-a-ENSG00000005844	TRUE	reported	eqtl-a-ENSG00000005844	rs113711981	1.5444007362861e-06	2	1	TRUE	0.0273279416754319	23.0938735264701	ITGAL	ENSG00000005844
93	eqtl-a-ENSG00000005844	rs11538957	A	G	A	G	-0.189494	-0.0290346	0.038178	0.0419699	FALSE	FALSE	FALSE	KIRC	30670495	0.75529	0.0931576	outcome	TRUE	reported	380248	378749	1499	16	30681816	0.0310182	1.00129027934714e-09	25152	NA	NA	eqtl-a-ENSG00000005844	TRUE	reported	eqtl-a-ENSG00000005844	rs11538957	1.00129027934714e-09	2	1	TRUE	-0.0384935	37.3214	ITGAL	ENSG00000005844
94	eqtl-a-ENSG00000005844	rs11546678	A	G	A	G	0.117964	0.0981509	0.0854496	0.103014	FALSE	FALSE	FALSE	KIRC	29816360	0.106597	0.0608244	outcome	TRUE	reported	380248	378749	1499	16	29827681	0.0212673	2.91279553365857e-08	25906	NA	NA	eqtl-a-ENSG00000005844	TRUE	reported	eqtl-a-ENSG00000005844	rs11546678	2.91279553365857e-08	2	1	TRUE	0.0344426028767245	30.7662288569319	ITGAL	ENSG00000005844
95	eqtl-a-ENSG00000005844	rs11640961	T	C	T	C	-0.0843569	-0.0781967	0.388687	0.428519	FALSE	FALSE	FALSE	KIRC	30968497	0.0360919	0.0373095	outcome	TRUE	reported	380248	378749	1499	16	30979818	0.0121893	4.49055479355517e-12	31240	NA	NA	eqtl-a-ENSG00000005844	TRUE	reported	eqtl-a-ENSG00000005844	rs11640961	4.49055479355517e-12	2	1	TRUE	-0.0391262	47.8942846952538	ITGAL	ENSG00000005844
96	eqtl-a-ENSG00000005844	rs11642733	A	G	A	G	0.114283	-0.0569377	0.100932	0.0711333	FALSE	FALSE	FALSE	KIRC	30957740	0.421748	0.0708715	outcome	TRUE	reported	380248	378749	1499	16	30969061	0.0197342	6.99696980911455e-09	31484	NA	NA	eqtl-a-ENSG00000005844	TRUE	reported	eqtl-a-ENSG00000005844	rs11642733	6.99696980911455e-09	2	1	TRUE	0.0326211863550638	33.5370002465685	ITGAL	ENSG00000005844
97	eqtl-a-ENSG00000005844	rs11642740	G	A	G	A	0.0583802	0.0127418	0.384644	0.362844	FALSE	FALSE	FALSE	KIRC	30049334	0.739868	0.0383756	outcome	TRUE	reported	380248	378749	1499	16	30060655	0.0122237	1.78821609718863e-06	31684	NA	NA	eqtl-a-ENSG00000005844	TRUE	reported	eqtl-a-ENSG00000005844	rs11642740	1.78821609718863e-06	2	1	TRUE	0.0268225657248999	22.8100265902951	ITGAL	ENSG00000005844
98	eqtl-a-ENSG00000005844	rs11642862	T	C	T	C	0.133268	-0.0553082	0.0965124	0.0631961	FALSE	FALSE	FALSE	KIRC	30774503	0.457356	0.0744182	outcome	TRUE	reported	380248	378749	1499	16	30785824	0.0201242	3.5391583956695e-11	31569	NA	NA	eqtl-a-ENSG00000005844	TRUE	reported	eqtl-a-ENSG00000005844	rs11642862	3.5391583956695e-11	2	1	TRUE	0.0372468146010258	43.8545350243238	ITGAL	ENSG00000005844
99	eqtl-a-ENSG00000005844	rs11644048	G	A	G	A	-0.0556858	-0.00979225	0.403455	0.33548	FALSE	FALSE	FALSE	KIRC	29874377	0.802886	0.0392296	outcome	TRUE	reported	380248	378749	1499	16	29885698	0.0121227	4.3566232013748e-06	27070	NA	NA	eqtl-a-ENSG00000005844	TRUE	reported	eqtl-a-ENSG00000005844	rs11644048	4.3566232013748e-06	2	1	TRUE	-0.0279092	21.1003768037257	ITGAL	ENSG00000005844
100	eqtl-a-ENSG00000005844	rs11645175	T	C	T	C	0.127673	-0.055363	0.0981543	0.0632126	FALSE	FALSE	FALSE	KIRC	30791978	0.456866	0.074411	outcome	TRUE	reported	380248	378749	1499	16	30803299	0.0199754	1.64369032938464e-10	31569	NA	NA	eqtl-a-ENSG00000005844	TRUE	reported	eqtl-a-ENSG00000005844	rs11645175	1.64369032938464e-10	2	1	TRUE	0.0359505957066163	40.8514200116152	ITGAL	ENSG00000005844
101	eqtl-a-ENSG00000005844	rs11645367	T	C	T	C	0.130796	-0.0476385	0.0975352	0.0620916	FALSE	FALSE	FALSE	KIRC	30758753	0.525366	0.0750099	outcome	TRUE	reported	380248	378749	1499	16	30770074	0.0200306	6.59477525949486e-11	31568	NA	NA	eqtl-a-ENSG00000005844	TRUE	reported	eqtl-a-ENSG00000005844	rs11645367	6.59477525949486e-11	2	1	TRUE	0.0367280279291767	42.6384106910299	ITGAL	ENSG00000005844
102	eqtl-a-ENSG00000005844	rs11648125	A	C	A	C	0.12076	-0.0549628	0.0976181	0.0630085	FALSE	FALSE	FALSE	KIRC	30878332	0.460865	0.0745336	outcome	TRUE	reported	380248	378749	1499	16	30889653	0.0200275	1.64369032938464e-09	31566	NA	NA	eqtl-a-ENSG00000005844	TRUE	reported	eqtl-a-ENSG00000005844	rs11648125	1.64369032938464e-09	2	1	TRUE	0.0339195722406592	36.3573924326152	ITGAL	ENSG00000005844
103	eqtl-a-ENSG00000005844	rs11859300	T	G	T	G	-0.0813158	-0.0540789	0.157451	0.129476	FALSE	FALSE	FALSE	KIRC	31344574	0.321386	0.0545363	outcome	TRUE	reported	380248	378749	1499	16	31355895	0.0163265	6.33213258884966e-07	31569	NA	NA	eqtl-a-ENSG00000005844	TRUE	reported	eqtl-a-ENSG00000005844	rs11859300	6.33213258884966e-07	2	1	TRUE	-0.0280217	24.8063971652547	ITGAL	ENSG00000005844
104	eqtl-a-ENSG00000005844	rs11860650	T	C	T	C	-0.0844983	-0.0655915	0.125648	0.120482	FALSE	FALSE	FALSE	KIRC	31315385	0.244757	0.05639	outcome	TRUE	reported	380248	378749	1499	16	31326706	0.0179425	2.48450571459193e-06	31681	NA	NA	eqtl-a-ENSG00000005844	TRUE	reported	eqtl-a-ENSG00000005844	rs11860650	2.48450571459193e-06	2	1	TRUE	-0.0264501	22.1783908787164	ITGAL	ENSG00000005844
105	eqtl-a-ENSG00000005844	rs11862806	G	A	G	A	0.0976457	0.0308758	0.344564	0.351815	FALSE	FALSE	FALSE	KIRC	30352750	0.425567	0.0387498	outcome	TRUE	reported	380248	378749	1499	16	30364071	0.012497	5.56672798150947e-15	31684	NA	NA	eqtl-a-ENSG00000005844	TRUE	reported	eqtl-a-ENSG00000005844	rs11862806	5.56672798150947e-15	2	1	TRUE	0.0438553940931586	61.0512705556496	ITGAL	ENSG00000005844
106	eqtl-a-ENSG00000005844	rs11864054	A	G	A	G	0.0912632	0.0820097	0.611667	0.597212	FALSE	FALSE	FALSE	KIRC	30834813	0.0300691	0.0378067	outcome	TRUE	reported	380248	378749	1499	16	30846134	0.0121878	6.9823240407717e-14	31354	NA	NA	eqtl-a-ENSG00000005844	TRUE	reported	eqtl-a-ENSG00000005844	rs11864054	6.9823240407717e-14	2	1	TRUE	0.0422522401433756	56.0713157609587	ITGAL	ENSG00000005844
107	eqtl-a-ENSG00000005844	rs11864632	C	G	C	G	0.0631854	-0.0076367	0.331483	0.38322	FALSE	TRUE	FALSE	KIRC	31171134	0.840377	0.037916	outcome	TRUE	reported	380248	378749	1499	16	31182455	0.012632	5.67387808702047e-07	31562	NA	NA	eqtl-a-ENSG00000005844	TRUE	reported	eqtl-a-ENSG00000005844	rs11864632	5.67387808702047e-07	2	1	TRUE	0.0281451808288068	25.020111706259	ITGAL	ENSG00000005844
108	eqtl-a-ENSG00000005844	rs11865086	A	C	A	C	-0.0821963	-0.0662451	0.462147	0.482861	FALSE	FALSE	FALSE	KIRC	30119172	0.073421	0.0370042	outcome	TRUE	reported	380248	378749	1499	16	30130493	0.0119177	5.31128981855012e-12	31599	NA	NA	eqtl-a-ENSG00000005844	TRUE	reported	eqtl-a-ENSG00000005844	rs11865086	5.31128981855012e-12	2	1	TRUE	-0.0387713	47.568519993052	ITGAL	ENSG00000005844
109	eqtl-a-ENSG00000005844	rs11865716	G	A	G	A	-0.120193	-0.0170379	0.542165	0.572263	FALSE	FALSE	FALSE	KIRC	30153167	0.64823	0.0373457	outcome	TRUE	reported	380248	378749	1499	16	30164488	0.0119031	5.66108922633216e-24	30902	NA	NA	eqtl-a-ENSG00000005844	TRUE	reported	eqtl-a-ENSG00000005844	rs11865716	5.66108922633216e-24	2	1	TRUE	-0.0573488	101.961962541835	ITGAL	ENSG00000005844
110	eqtl-a-ENSG00000005844	rs12485738	G	A	G	A	-0.0744461	-0.00212599	0.639877	0.70829	FALSE	FALSE	FALSE	KIRC	56831748	0.958198	0.0405611	outcome	TRUE	reported	380248	378749	1499	3	56865776	0.0123827	1.83248319253823e-09	31300	NA	NA	eqtl-a-ENSG00000005844	TRUE	reported	eqtl-a-ENSG00000005844	rs12485738	1.83248319253823e-09	2	1	TRUE	-0.0339639	36.1454137328112	ITGAL	ENSG00000005844
111	eqtl-a-ENSG00000005844	rs12598856	T	C	T	C	0.0577111	0.0116394	0.388272	0.365938	FALSE	FALSE	FALSE	KIRC	30018227	0.76127	0.0383111	outcome	TRUE	reported	380248	378749	1499	16	30029548	0.0122026	2.25408350020241e-06	31568	NA	NA	eqtl-a-ENSG00000005844	TRUE	reported	eqtl-a-ENSG00000005844	rs12598856	2.25408350020241e-06	2	1	TRUE	0.0266099088624273	22.3673201371769	ITGAL	ENSG00000005844
112	eqtl-a-ENSG00000005844	rs12716981	A	C	A	C	-0.0758507	-0.0837653	0.361083	0.384689	FALSE	FALSE	FALSE	KIRC	31106703	0.0268423	0.0378377	outcome	TRUE	reported	380248	378749	1499	16	31118024	0.0123749	8.82104423611248e-10	31562	NA	NA	eqtl-a-ENSG00000005844	TRUE	reported	eqtl-a-ENSG00000005844	rs12716981	8.82104423611248e-10	2	1	TRUE	-0.0344819	37.5695324131466	ITGAL	ENSG00000005844
113	eqtl-a-ENSG00000005844	rs12917722	G	A	G	A	-0.0776029	-0.0736567	0.409701	0.438012	FALSE	FALSE	FALSE	KIRC	30937076	0.0478586	0.0372263	outcome	TRUE	reported	380248	378749	1499	16	30948397	0.0120849	1.34849704776944e-10	30402	NA	NA	eqtl-a-ENSG00000005844	TRUE	reported	eqtl-a-ENSG00000005844	rs12917722	1.34849704776944e-10	2	1	TRUE	-0.0368047	41.2353590002162	ITGAL	ENSG00000005844
114	eqtl-a-ENSG00000005844	rs12921753	T	C	T	C	0.0572295	0.00480353	0.385515	0.367892	FALSE	FALSE	FALSE	KIRC	30007399	0.900097	0.0382632	outcome	TRUE	reported	380248	378749	1499	16	30018720	0.0122189	2.81877233215413e-06	31681	NA	NA	eqtl-a-ENSG00000005844	TRUE	reported	eqtl-a-ENSG00000005844	rs12921753	2.81877233215413e-06	2	1	TRUE	0.0263058168493211	21.9369215494525	ITGAL	ENSG00000005844
115	eqtl-a-ENSG00000005844	rs12929754	A	G	A	G	-0.261144	-0.0206776	0.551354	0.577324	FALSE	FALSE	FALSE	KIRC	30501122	0.581962	0.0375602	outcome	TRUE	reported	380248	378749	1499	16	30512443	0.0117632	3.43557947899876e-109	31227	NA	NA	eqtl-a-ENSG00000005844	TRUE	reported	eqtl-a-ENSG00000005844	rs12929754	3.43557947899876e-109	2	1	TRUE	-0.124653	492.843623510469	ITGAL	ENSG00000005844
116	eqtl-a-ENSG00000005844	rs12934418	A	G	A	G	-0.0790145	-0.0816853	0.368399	0.387741	FALSE	FALSE	FALSE	KIRC	31030978	0.0306697	0.0377939	outcome	TRUE	reported	380248	378749	1499	16	31042299	0.0123206	1.42501685112895e-10	31568	NA	NA	eqtl-a-ENSG00000005844	TRUE	reported	eqtl-a-ENSG00000005844	rs12934418	1.42501685112895e-10	2	1	TRUE	-0.036073	41.1291634727789	ITGAL	ENSG00000005844
117	eqtl-a-ENSG00000005844	rs13332660	C	T	C	T	-0.0712345	-0.0203001	0.80503	0.748249	FALSE	FALSE	FALSE	KIRC	29894561	0.633234	0.0425417	outcome	TRUE	reported	380248	378749	1499	16	29905882	0.015011	2.08089420139036e-06	27399	NA	NA	eqtl-a-ENSG00000005844	TRUE	reported	eqtl-a-ENSG00000005844	rs13332660	2.08089420139036e-06	2	1	TRUE	-0.0286583	22.5196434801098	ITGAL	ENSG00000005844
118	eqtl-a-ENSG00000005844	rs13338928	C	T	C	T	0.0884504	-0.016317	0.262082	0.259284	FALSE	FALSE	FALSE	KIRC	31328582	0.698258	0.0420897	outcome	TRUE	reported	380248	378749	1499	16	31339903	0.0135134	5.93335044380005e-11	31561	NA	NA	eqtl-a-ENSG00000005844	TRUE	reported	eqtl-a-ENSG00000005844	rs13338928	5.93335044380005e-11	2	1	TRUE	0.0368195918493553	42.8420593162097	ITGAL	ENSG00000005844
119	eqtl-a-ENSG00000005844	rs1354034	C	T	C	T	-0.100944	-0.00401403	0.618137	0.705252	FALSE	FALSE	FALSE	KIRC	56815721	0.921055	0.0405029	outcome	TRUE	reported	380248	378749	1499	3	56849749	0.0122208	1.45680022546016e-16	31684	NA	NA	eqtl-a-ENSG00000005844	TRUE	reported	eqtl-a-ENSG00000005844	rs1354034	1.45680022546016e-16	2	1	TRUE	-0.0463562	68.2278595446302	ITGAL	ENSG00000005844
120	eqtl-a-ENSG00000005844	rs138082532	T	C	T	C	0.132336	0.0283784	0.431622	0.388529	FALSE	FALSE	FALSE	KIRC	30311987	0.453294	0.0378412	outcome	TRUE	reported	380248	378749	1499	16	30323308	0.0119647	1.94356916364769e-28	27480	NA	NA	eqtl-a-ENSG00000005844	TRUE	reported	eqtl-a-ENSG00000005844	rs138082532	1.94356916364769e-28	2	1	TRUE	0.0665762009720834	122.335465705173	ITGAL	ENSG00000005844
121	eqtl-a-ENSG00000005844	rs149110519	T	C	T	C	0.187114	0.0939635	0.0526158	0.0257763	FALSE	FALSE	FALSE	KIRC	144064640	0.416783	0.115716	outcome	TRUE	reported	380248	378749	1499	6	144385777	0.0266112	2.04456065929586e-12	25735	NA	NA	eqtl-a-ENSG00000005844	TRUE	reported	eqtl-a-ENSG00000005844	rs149110519	2.04456065929586e-12	2	1	TRUE	0.0437904906338588	49.4405903567389	ITGAL	ENSG00000005844
122	eqtl-a-ENSG00000005844	rs150458589	A	G	A	G	0.134278	0.0829682	0.0929482	0.127621	FALSE	FALSE	FALSE	KIRC	30681814	0.134695	0.055466	outcome	TRUE	reported	380248	378749	1499	16	30693135	0.0204667	5.35180153771287e-11	28459	NA	NA	eqtl-a-ENSG00000005844	TRUE	reported	eqtl-a-ENSG00000005844	rs150458589	5.35180153771287e-11	2	1	TRUE	0.0388628166765158	43.0441444931711	ITGAL	ENSG00000005844
123	eqtl-a-ENSG00000005844	rs17708638	T	C	T	C	0.0803827	0.0264611	0.341762	0.398702	FALSE	FALSE	FALSE	KIRC	31159853	0.481997	0.0376352	outcome	TRUE	reported	380248	378749	1499	16	31171174	0.0125302	1.40818592767649e-10	31355	NA	NA	eqtl-a-ENSG00000005844	TRUE	reported	eqtl-a-ENSG00000005844	rs17708638	1.40818592767649e-10	2	1	TRUE	0.0362059707707182	41.1537271134341	ITGAL	ENSG00000005844
124	eqtl-a-ENSG00000005844	rs17855121	C	T	C	T	0.0997567	0.0946995	0.267555	0.318145	FALSE	FALSE	FALSE	KIRC	30992848	0.0179668	0.0400201	outcome	TRUE	reported	380248	378749	1499	16	31004169	0.0134184	1.05196187382322e-13	28388	NA	NA	eqtl-a-ENSG00000005844	TRUE	reported	eqtl-a-ENSG00000005844	rs17855121	1.05196187382322e-13	2	1	TRUE	0.044082564745301	55.2691365913077	ITGAL	ENSG00000005844
125	eqtl-a-ENSG00000005844	rs1978079	T	C	T	C	-0.105722	-0.0206094	0.283642	0.234131	FALSE	FALSE	FALSE	KIRC	30494191	0.640714	0.0441598	outcome	TRUE	reported	380248	378749	1499	16	30505512	0.0131736	1.01204541109654e-15	31270	NA	NA	eqtl-a-ENSG00000005844	TRUE	reported	eqtl-a-ENSG00000005844	rs1978079	1.01204541109654e-15	2	1	TRUE	-0.0453382	64.4053279005754	ITGAL	ENSG00000005844
126	eqtl-a-ENSG00000005844	rs2278557	G	C	G	C	0.0558793	0.0144881	0.39614	0.369437	FALSE	TRUE	FALSE	KIRC	30082458	0.704719	0.0382314	outcome	TRUE	reported	380248	378749	1499	16	30093779	0.0121598	4.3233460619684e-06	31683	NA	NA	eqtl-a-ENSG00000005844	TRUE	reported	eqtl-a-ENSG00000005844	rs2278557	4.3233460619684e-06	2	1	TRUE	0.0258095473170144	21.1178183750234	ITGAL	ENSG00000005844
127	eqtl-a-ENSG00000005844	rs2285459	C	T	C	T	-0.297602	-0.0107028	0.573828	0.594845	FALSE	FALSE	FALSE	KIRC	30484091	0.777114	0.0378083	outcome	TRUE	reported	380248	378749	1499	16	30495412	0.0117719	5.19995996533526e-141	31569	NA	NA	eqtl-a-ENSG00000005844	TRUE	reported	eqtl-a-ENSG00000005844	rs2285459	5.19995996533526e-141	2	1	TRUE	-0.140871	639.114340844584	ITGAL	ENSG00000005844
128	eqtl-a-ENSG00000005844	rs2288004	C	G	C	G	-0.0812755	-0.0789477	0.372981	0.387285	FALSE	TRUE	FALSE	KIRC	31042719	0.0367561	0.0378019	outcome	TRUE	reported	380248	378749	1499	16	31054040	0.0122882	3.735940922588e-11	31567	NA	NA	eqtl-a-ENSG00000005844	TRUE	reported	eqtl-a-ENSG00000005844	rs2288004	3.735940922588e-11	2	1	TRUE	-0.0372021	43.7464440927117	ITGAL	ENSG00000005844
129	eqtl-a-ENSG00000005844	rs2303222	C	T	C	T	-0.0822437	-0.0811767	0.375381	0.386469	FALSE	FALSE	FALSE	KIRC	31074149	0.031853	0.0378226	outcome	TRUE	reported	380248	378749	1499	16	31085470	0.0122719	2.05873287673352e-11	31684	NA	NA	eqtl-a-ENSG00000005844	TRUE	reported	eqtl-a-ENSG00000005844	rs2303222	2.05873287673352e-11	2	1	TRUE	-0.037625	44.9139928073245	ITGAL	ENSG00000005844
130	eqtl-a-ENSG00000005844	rs34572943	A	G	A	G	-0.107327	-0.0354751	0.107243	0.0962304	FALSE	FALSE	FALSE	KIRC	31261032	0.567588	0.0620621	outcome	TRUE	reported	380248	378749	1499	16	31272353	0.0192139	2.32359268186692e-08	31240	NA	NA	eqtl-a-ENSG00000005844	TRUE	reported	eqtl-a-ENSG00000005844	rs34572943	2.32359268186692e-08	2	1	TRUE	-0.0315889	31.202322993918	ITGAL	ENSG00000005844
131	eqtl-a-ENSG00000005844	rs35467921	T	C	T	C	0.0586095	0.0115122	0.384904	0.362656	FALSE	FALSE	FALSE	KIRC	30037232	0.764195	0.0383769	outcome	TRUE	reported	380248	378749	1499	16	30048553	0.012222	1.62509966207798e-06	31479	NA	NA	eqtl-a-ENSG00000005844	TRUE	reported	eqtl-a-ENSG00000005844	rs35467921	1.62509966207798e-06	2	1	TRUE	0.0270190756951488	22.9959562676879	ITGAL	ENSG00000005844
132	eqtl-a-ENSG00000005844	rs36055763	T	C	T	C	-0.0844253	-0.0658635	0.123801	0.120466	FALSE	FALSE	FALSE	KIRC	31288454	0.242889	0.0563999	outcome	TRUE	reported	380248	378749	1499	16	31299775	0.018057	2.93102822098014e-06	31565	NA	NA	eqtl-a-ENSG00000005844	TRUE	reported	eqtl-a-ENSG00000005844	rs36055763	2.93102822098014e-06	2	1	TRUE	-0.026308	21.8601948655947	ITGAL	ENSG00000005844
133	eqtl-a-ENSG00000005844	rs3763309	A	C	A	C	0.0719671	-0.0291779	0.191805	0.190446	FALSE	FALSE	FALSE	KIRC	32408196	0.537478	0.0473183	outcome	TRUE	reported	380248	378749	1499	6	32375973	0.0151045	1.89230004632455e-06	29827	NA	NA	eqtl-a-ENSG00000005844	TRUE	reported	eqtl-a-ENSG00000005844	rs3763309	1.89230004632455e-06	2	1	TRUE	0.0275785991466237	22.7015388955218	ITGAL	ENSG00000005844
134	eqtl-a-ENSG00000005844	rs4787494	C	T	C	T	-0.109706	-0.0284679	0.529796	0.561439	FALSE	FALSE	FALSE	KIRC	30141147	0.444858	0.0372609	outcome	TRUE	reported	380248	378749	1499	16	30152468	0.0118889	2.76757883062595e-20	30817	NA	NA	eqtl-a-ENSG00000005844	TRUE	reported	eqtl-a-ENSG00000005844	rs4787494	2.76757883062595e-20	2	1	TRUE	-0.0524938	85.1485805865599	ITGAL	ENSG00000005844
135	eqtl-a-ENSG00000005844	rs4788408	G	A	G	A	0.140026	0.0285378	0.426543	0.3883	FALSE	FALSE	FALSE	KIRC	30329353	0.450995	0.0378608	outcome	TRUE	reported	380248	378749	1499	16	30340674	0.0119762	1.40378306870724e-31	27156	NA	NA	eqtl-a-ENSG00000005844	TRUE	reported	eqtl-a-ENSG00000005844	rs4788408	1.40378306870724e-31	2	1	TRUE	0.0707753911446282	136.703390405076	ITGAL	ENSG00000005844
136	eqtl-a-ENSG00000005844	rs4788413	T	C	T	C	-0.112791	-0.0252418	0.67097	0.6818	FALSE	FALSE	FALSE	KIRC	30399124	0.525289	0.0397375	outcome	TRUE	reported	380248	378749	1499	16	30410445	0.0126314	4.28351211945937e-19	31565	NA	NA	eqtl-a-ENSG00000005844	TRUE	reported	eqtl-a-ENSG00000005844	rs4788413	4.28351211945937e-19	2	1	TRUE	-0.0501979	79.7344343839616	ITGAL	ENSG00000005844
137	eqtl-a-ENSG00000005844	rs4889530	A	T	A	T	-0.0816584	-0.0828074	0.373103	0.388261	FALSE	TRUE	FALSE	KIRC	31054597	0.0284485	0.0377936	outcome	TRUE	reported	380248	378749	1499	16	31065918	0.0122872	3.0157823836532e-11	31565	NA	NA	eqtl-a-ENSG00000005844	TRUE	reported	eqtl-a-ENSG00000005844	rs4889530	3.0157823836532e-11	2	1	TRUE	-0.0373814	44.166794199418	ITGAL	ENSG00000005844
138	eqtl-a-ENSG00000005844	rs4889619	T	C	T	C	-0.0774014	-0.0831737	0.359123	0.384807	FALSE	FALSE	FALSE	KIRC	31117294	0.0279975	0.0378524	outcome	TRUE	reported	380248	378749	1499	16	31128615	0.012389	4.16811794814824e-10	31474	NA	NA	eqtl-a-ENSG00000005844	TRUE	reported	eqtl-a-ENSG00000005844	rs4889619	4.16811794814824e-10	2	1	TRUE	-0.035195	39.0323883622935	ITGAL	ENSG00000005844
139	eqtl-a-ENSG00000005844	rs4889634	T	C	T	C	-0.0939014	-0.0555001	0.397839	0.399733	FALSE	FALSE	FALSE	KIRC	30867542	0.142128	0.0378089	outcome	TRUE	reported	380248	378749	1499	16	30878863	0.0121343	1.00530999402313e-14	30902	NA	NA	eqtl-a-ENSG00000005844	TRUE	reported	eqtl-a-ENSG00000005844	rs4889634	1.00530999402313e-14	2	1	TRUE	-0.0439802	59.8845346056222	ITGAL	ENSG00000005844
140	eqtl-a-ENSG00000005844	rs4889644	G	T	G	T	-0.0602139	0.0204623	0.654803	0.595686	FALSE	FALSE	FALSE	KIRC	31271392	0.586311	0.0376015	outcome	TRUE	reported	380248	378749	1499	16	31282713	0.0125083	1.48091454968733e-06	31050	NA	NA	eqtl-a-ENSG00000005844	TRUE	reported	eqtl-a-ENSG00000005844	rs4889644	1.48091454968733e-06	2	1	TRUE	-0.0273099	23.1737830194659	ITGAL	ENSG00000005844
141	eqtl-a-ENSG00000005844	rs55732507	C	T	C	T	-0.0605658	-0.0518335	0.411507	0.436505	FALSE	FALSE	FALSE	KIRC	30130664	0.164712	0.0373064	outcome	TRUE	reported	380248	378749	1499	16	30141985	0.0120837	5.38108683071888e-07	30902	NA	NA	eqtl-a-ENSG00000005844	TRUE	reported	eqtl-a-ENSG00000005844	rs55732507	5.38108683071888e-07	2	1	TRUE	-0.0285018	25.1220483447377	ITGAL	ENSG00000005844
142	eqtl-a-ENSG00000005844	rs55755739	A	C	A	C	0.067928	-0.0320354	0.341221	0.374617	FALSE	FALSE	FALSE	KIRC	31243370	0.40181	0.0382105	outcome	TRUE	reported	380248	378749	1499	16	31254691	0.0125402	6.06750300369628e-08	27071	NA	NA	eqtl-a-ENSG00000005844	TRUE	reported	eqtl-a-ENSG00000005844	rs55755739	6.06750300369628e-08	2	1	TRUE	0.0329058418148891	29.3419335872414	ITGAL	ENSG00000005844
143	eqtl-a-ENSG00000005844	rs56391383	A	G	A	G	0.140439	-0.0787379	0.35287	0.261534	FALSE	FALSE	FALSE	KIRC	30527098	0.0610829	0.0420408	outcome	TRUE	reported	380248	378749	1499	16	30538419	0.0123987	9.66718433834452e-30	31470	NA	NA	eqtl-a-ENSG00000005844	TRUE	reported	eqtl-a-ENSG00000005844	rs56391383	9.66718433834452e-30	2	1	TRUE	0.0637225973217665	128.298965028663	ITGAL	ENSG00000005844
144	eqtl-a-ENSG00000005844	rs61598883	G	T	G	T	0.26435	0.054699	0.197487	0.191027	FALSE	FALSE	FALSE	KIRC	30432226	0.246283	0.0471777	outcome	TRUE	reported	380248	378749	1499	16	30443547	0.0147838	1.65844090127757e-71	30902	NA	NA	eqtl-a-ENSG00000005844	TRUE	reported	eqtl-a-ENSG00000005844	rs61598883	1.65844090127757e-71	2	1	TRUE	0.101199565742341	319.732270854561	ITGAL	ENSG00000005844
145	eqtl-a-ENSG00000005844	rs62051471	T	C	T	C	0.0960849	-0.0366933	0.170822	0.182624	FALSE	FALSE	FALSE	KIRC	31298484	0.440892	0.0476111	outcome	TRUE	reported	380248	378749	1499	16	31309805	0.0157936	1.17370782501911e-09	29902	NA	NA	eqtl-a-ENSG00000005844	TRUE	reported	eqtl-a-ENSG00000005844	rs62051471	1.17370782501911e-09	2	1	TRUE	0.0351616930879463	37.0124655223789	ITGAL	ENSG00000005844
146	eqtl-a-ENSG00000005844	rs62055459	C	T	C	T	-0.119026	-0.0301025	0.673871	0.680696	FALSE	FALSE	FALSE	KIRC	30387087	0.448186	0.0396899	outcome	TRUE	reported	380248	378749	1499	16	30398408	0.0126563	5.23238871112426e-21	27816	NA	NA	eqtl-a-ENSG00000005844	TRUE	reported	eqtl-a-ENSG00000005844	rs62055459	5.23238871112426e-21	2	1	TRUE	-0.0563007	88.4443626282799	ITGAL	ENSG00000005844
147	eqtl-a-ENSG00000005844	rs62056315	G	A	G	A	0.267962	0.0559608	0.198723	0.188614	FALSE	FALSE	FALSE	KIRC	30446894	0.237764	0.0474006	outcome	TRUE	reported	380248	378749	1499	16	30458215	0.0147437	8.20162673151548e-74	27395	NA	NA	eqtl-a-ENSG00000005844	TRUE	reported	eqtl-a-ENSG00000005844	rs62056315	8.20162673151548e-74	2	1	TRUE	0.109155120820832	330.318920333173	ITGAL	ENSG00000005844
148	eqtl-a-ENSG00000005844	rs62057232	C	T	C	T	-0.0918165	-0.0837804	0.391885	0.409289	FALSE	FALSE	FALSE	KIRC	30809545	0.0262851	0.0377054	outcome	TRUE	reported	380248	378749	1499	16	30820866	0.0121674	4.48125853325156e-14	31237	NA	NA	eqtl-a-ENSG00000005844	TRUE	reported	eqtl-a-ENSG00000005844	rs62057232	4.48125853325156e-14	2	1	TRUE	-0.0426586	56.9437279879358	ITGAL	ENSG00000005844
149	eqtl-a-ENSG00000005844	rs62057680	C	T	C	T	0.130892	0.153173	0.055991	0.0748123	FALSE	FALSE	FALSE	KIRC	29975306	0.0291125	0.0702	outcome	TRUE	reported	380248	378749	1499	16	29986627	0.0258645	4.17936209947383e-07	26891	NA	NA	eqtl-a-ENSG00000005844	TRUE	reported	eqtl-a-ENSG00000005844	rs62057680	4.17936209947383e-07	2	1	TRUE	0.0308471444254554	25.6104985527315	ITGAL	ENSG00000005844
150	eqtl-a-ENSG00000005844	rs62057756	A	G	A	G	0.0638518	0.00556401	0.384114	0.360864	FALSE	FALSE	FALSE	KIRC	30105932	0.885188	0.0385329	outcome	TRUE	reported	380248	378749	1499	16	30117253	0.0122249	1.76051609567385e-07	31476	NA	NA	eqtl-a-ENSG00000005844	TRUE	reported	eqtl-a-ENSG00000005844	rs62057756	1.76051609567385e-07	2	1	TRUE	0.0294282016997364	27.2807093600417	ITGAL	ENSG00000005844
151	eqtl-a-ENSG00000005844	rs6565178	C	T	C	T	0.106991	0.0252557	0.329265	0.357235	FALSE	FALSE	FALSE	KIRC	30341282	0.514324	0.0387286	outcome	TRUE	reported	380248	378749	1499	16	30352603	0.0126327	2.46660722915446e-17	27156	NA	NA	eqtl-a-ENSG00000005844	TRUE	reported	eqtl-a-ENSG00000005844	rs6565178	2.46660722915446e-17	2	1	TRUE	0.0513288218101794	71.7302142532499	ITGAL	ENSG00000005844
152	eqtl-a-ENSG00000005844	rs6565182	T	C	T	C	0.104659	0.0302001	0.328216	0.318493	FALSE	FALSE	FALSE	KIRC	30363060	0.446616	0.0396811	outcome	TRUE	reported	380248	378749	1499	16	30374381	0.0126444	1.26328110380736e-16	31684	NA	NA	eqtl-a-ENSG00000005844	TRUE	reported	eqtl-a-ENSG00000005844	rs6565182	1.26328110380736e-16	2	1	TRUE	0.0464518482849275	68.510432536641	ITGAL	ENSG00000005844
153	eqtl-a-ENSG00000005844	rs6565192	C	T	C	T	0.0614017	0.0356004	0.474252	0.413207	FALSE	FALSE	FALSE	KIRC	30574214	0.345365	0.0377276	outcome	TRUE	reported	380248	378749	1499	16	30585535	0.0119081	2.52011291492561e-07	30902	NA	NA	eqtl-a-ENSG00000005844	TRUE	reported	eqtl-a-ENSG00000005844	rs6565192	2.52011291492561e-07	2	1	TRUE	0.0293205371452472	26.5873984874682	ITGAL	ENSG00000005844
154	eqtl-a-ENSG00000005844	rs7184910	A	G	A	G	-0.0878066	-0.0159885	0.51468	0.480962	FALSE	FALSE	FALSE	KIRC	31217701	0.665377	0.0369675	outcome	TRUE	reported	380248	378749	1499	16	31229022	0.0118857	1.49726957613185e-13	31233	NA	NA	eqtl-a-ENSG00000005844	TRUE	reported	eqtl-a-ENSG00000005844	rs7184910	1.49726957613185e-13	2	1	TRUE	-0.0417667	54.5763884703504	ITGAL	ENSG00000005844
155	eqtl-a-ENSG00000005844	rs7190997	C	T	C	T	-0.0744909	-0.00768693	0.509771	0.471881	FALSE	FALSE	FALSE	KIRC	31356857	0.83557	0.0370342	outcome	TRUE	reported	380248	378749	1499	16	31368178	0.0118892	3.72348835542873e-10	31684	NA	NA	eqtl-a-ENSG00000005844	TRUE	reported	eqtl-a-ENSG00000005844	rs7190997	3.72348835542873e-10	2	1	TRUE	-0.0351783	39.2555600112051	ITGAL	ENSG00000005844
156	eqtl-a-ENSG00000005844	rs7196129	C	T	C	T	-0.291071	-0.00759934	0.552449	0.585968	FALSE	FALSE	FALSE	KIRC	30459788	0.840781	0.0378274	outcome	TRUE	reported	380248	378749	1499	16	30471109	0.0117161	3.04789498962805e-136	31234	NA	NA	eqtl-a-ENSG00000005844	TRUE	reported	eqtl-a-ENSG00000005844	rs7196129	3.04789498962805e-136	2	1	TRUE	-0.139209	617.208269493721	ITGAL	ENSG00000005844
157	eqtl-a-ENSG00000005844	rs72785554	G	A	G	A	-0.102413	0.0772699	0.0890645	0.110778	FALSE	FALSE	FALSE	KIRC	31127940	0.193353	0.0594053	outcome	TRUE	reported	380248	378749	1499	16	31139261	0.0208775	9.3237366859636e-07	28805	NA	NA	eqtl-a-ENSG00000005844	TRUE	reported	eqtl-a-ENSG00000005844	rs72785554	9.3237366859636e-07	2	1	TRUE	-0.0288919	24.0631895257877	ITGAL	ENSG00000005844
158	eqtl-a-ENSG00000005844	rs72793363	T	C	T	C	-0.150244	0.0530652	0.0492791	0.0500686	FALSE	FALSE	FALSE	KIRC	30660257	0.528416	0.0841736	outcome	TRUE	reported	380248	378749	1499	16	30671578	0.027468	4.50536519813266e-08	29142	NA	NA	eqtl-a-ENSG00000005844	TRUE	reported	eqtl-a-ENSG00000005844	rs72793363	4.50536519813266e-08	2	1	TRUE	-0.032026	29.9185262885248	ITGAL	ENSG00000005844
159	eqtl-a-ENSG00000005844	rs78382251	A	G	A	G	0.105139	-0.0395843	0.103597	0.0640861	FALSE	FALSE	FALSE	KIRC	30693572	0.59319	0.0740975	outcome	TRUE	reported	380248	378749	1499	16	30704893	0.0195107	7.0930006557633e-08	31234	NA	NA	eqtl-a-ENSG00000005844	TRUE	reported	eqtl-a-ENSG00000005844	rs78382251	7.0930006557633e-08	2	1	TRUE	0.0304781980333873	29.0390217292696	ITGAL	ENSG00000005844
160	eqtl-a-ENSG00000005844	rs8044603	G	A	G	A	0.0835371	-0.0662751	0.210529	0.16175	FALSE	FALSE	FALSE	KIRC	30548056	0.188326	0.0503783	outcome	TRUE	reported	380248	378749	1499	16	30559377	0.014582	1.01139313159964e-08	30518	NA	NA	eqtl-a-ENSG00000005844	TRUE	reported	eqtl-a-ENSG00000005844	rs8044603	1.01139313159964e-08	2	1	TRUE	0.0327766896100763	32.8189438918264	ITGAL	ENSG00000005844
161	eqtl-a-ENSG00000005844	rs8045252	A	G	A	G	0.140552	0.0405325	0.220277	0.212489	FALSE	FALSE	FALSE	KIRC	30411094	0.370774	0.0452864	outcome	TRUE	reported	380248	378749	1499	16	30422415	0.0143124	9.2150988873496e-23	27490	NA	NA	eqtl-a-ENSG00000005844	TRUE	reported	eqtl-a-ENSG00000005844	rs8045252	9.2150988873496e-23	2	1	TRUE	0.0591279051799763	96.4382073929845	ITGAL	ENSG00000005844
162	eqtl-a-ENSG00000005844	rs8046445	T	C	T	C	-0.106201	-0.0217439	0.655887	0.654841	FALSE	FALSE	FALSE	KIRC	30374941	0.576547	0.0389371	outcome	TRUE	reported	380248	378749	1499	16	30386262	0.012496	1.91557870298695e-17	31684	NA	NA	eqtl-a-ENSG00000005844	TRUE	reported	eqtl-a-ENSG00000005844	rs8046445	1.91557870298695e-17	2	1	TRUE	-0.0476932	72.2295949108324	ITGAL	ENSG00000005844
163	eqtl-a-ENSG00000005844	rs8056505	T	C	T	C	-0.0661256	0.0106363	0.663052	0.618457	FALSE	FALSE	FALSE	KIRC	31203577	0.779249	0.0379464	outcome	TRUE	reported	380248	378749	1499	16	31214898	0.0125795	1.4689939257565e-07	31677	NA	NA	eqtl-a-ENSG00000005844	TRUE	reported	eqtl-a-ENSG00000005844	rs8056505	1.4689939257565e-07	2	1	TRUE	-0.0295229	27.6320109591136	ITGAL	ENSG00000005844
164	eqtl-a-ENSG00000005844	rs930392	G	A	G	A	-0.121628	-0.00945338	0.553959	0.625151	FALSE	FALSE	FALSE	KIRC	30183519	0.803947	0.0380812	outcome	TRUE	reported	380248	378749	1499	16	30194840	0.0119296	2.0787391718787e-24	30817	NA	NA	eqtl-a-ENSG00000005844	TRUE	reported	eqtl-a-ENSG00000005844	rs930392	2.0787391718787e-24	2	1	TRUE	-0.0579823	103.94781549342	ITGAL	ENSG00000005844
165	eqtl-a-ENSG00000005844	rs9319587	T	C	T	C	-0.0934849	-0.0837111	0.39163	0.408449	FALSE	FALSE	FALSE	KIRC	30821925	0.0264326	0.0377112	outcome	TRUE	reported	380248	378749	1499	16	30833246	0.0121679	1.55417529077158e-14	31240	NA	NA	eqtl-a-ENSG00000005844	TRUE	reported	eqtl-a-ENSG00000005844	rs9319587	1.55417529077158e-14	2	1	TRUE	-0.0434284	59.0271305806258	ITGAL	ENSG00000005844
166	eqtl-a-ENSG00000005844	rs9673428	T	C	T	C	0.137588	-0.0798681	0.355913	0.261561	FALSE	FALSE	FALSE	KIRC	30537244	0.0574685	0.0420419	outcome	TRUE	reported	380248	378749	1499	16	30548565	0.0123768	1.04399880125748e-28	31566	NA	NA	eqtl-a-ENSG00000005844	TRUE	reported	eqtl-a-ENSG00000005844	rs9673428	1.04399880125748e-28	2	1	TRUE	0.0624493116204607	123.578912539052	ITGAL	ENSG00000005844
167	eqtl-a-ENSG00000005844	rs9926533	T	C	T	C	-0.074134	-0.0851292	0.373054	0.386392	FALSE	FALSE	FALSE	KIRC	31002858	0.0244703	0.0378408	outcome	TRUE	reported	380248	378749	1499	16	31014179	0.0122909	1.62341666554273e-09	31350	NA	NA	eqtl-a-ENSG00000005844	TRUE	reported	eqtl-a-ENSG00000005844	rs9926533	1.62341666554273e-09	2	1	TRUE	-0.0340469	36.3804022750491	ITGAL	ENSG00000005844
168	eqtl-a-ENSG00000005844	rs9927137	G	A	G	A	0.0570357	0.0498265	0.479319	0.438271	FALSE	FALSE	FALSE	KIRC	30622979	0.182614	0.0373862	outcome	TRUE	reported	380248	378749	1499	16	30634300	0.011904	1.65790636925701e-06	31355	NA	NA	eqtl-a-ENSG00000005844	TRUE	reported	eqtl-a-ENSG00000005844	rs9927137	1.65790636925701e-06	2	1	TRUE	0.0270492588519946	22.9566078533764	ITGAL	ENSG00000005844
169	eqtl-a-ENSG00000005844	rs9933843	T	C	T	C	-0.0625749	-0.0346383	0.590925	0.625251	FALSE	FALSE	FALSE	KIRC	30892358	0.364412	0.0381904	outcome	TRUE	reported	380248	378749	1499	16	30903679	0.0120939	2.29128968505377e-07	31300	NA	NA	eqtl-a-ENSG00000005844	TRUE	reported	eqtl-a-ENSG00000005844	rs9933843	2.29128968505377e-07	2	1	TRUE	-0.0292341	26.7711841818398	ITGAL	ENSG00000005844
170	eqtl-a-ENSG00000005844	rs9934438	A	G	A	G	-0.0806253	-0.0797544	0.370099	0.386095	FALSE	FALSE	FALSE	KIRC	31093557	0.0349229	0.0378118	outcome	TRUE	reported	380248	378749	1499	16	31104878	0.0123081	5.72268709222843e-11	31599	NA	NA	eqtl-a-ENSG00000005844	TRUE	reported	eqtl-a-ENSG00000005844	rs9934438	5.72268709222843e-11	2	1	TRUE	-0.0368267	42.9102114879367	ITGAL	ENSG00000005844
171	eqtl-a-ENSG00000007402	rs10446472	A	G	A	G	-0.136668	0.0154069	0.154895	0.150983	FALSE	FALSE	FALSE	KIRC	51256524	0.764823	0.0515014	outcome	TRUE	reported	380248	378749	1499	3	51293955	0.0164099	8.19407623180276e-17	29498	NA	NA	eqtl-a-ENSG00000007402	TRUE	reported	eqtl-a-ENSG00000007402	rs10446472	8.19407623180276e-17	2	1	TRUE	-0.0484361	69.3620322230954	CACNA2D2	ENSG00000007402
172	eqtl-a-ENSG00000007402	rs1076904	T	C	T	C	-0.188051	0.0285691	0.107672	0.0868952	FALSE	FALSE	FALSE	KIRC	50615038	0.65822	0.0645817	outcome	TRUE	reported	380248	378749	1499	3	50652469	0.0191359	8.59805066661175e-23	30165	NA	NA	eqtl-a-ENSG00000007402	TRUE	reported	eqtl-a-ENSG00000007402	rs1076904	8.59805066661175e-23	2	1	TRUE	-0.0564931	96.5725076938275	CACNA2D2	ENSG00000007402
173	eqtl-a-ENSG00000007402	rs11130217	G	A	G	A	0.0809564	-0.109153	0.834472	0.891434	FALSE	FALSE	FALSE	KIRC	49699890	0.0651553	0.0591873	outcome	TRUE	reported	380248	378749	1499	3	49737323	0.0159996	4.19256688755994e-07	31569	NA	NA	eqtl-a-ENSG00000007402	TRUE	reported	eqtl-a-ENSG00000007402	rs11130217	4.19256688755994e-07	2	1	TRUE	0.0284675020164267	25.6026031647816	CACNA2D2	ENSG00000007402
174	eqtl-a-ENSG00000007402	rs115770773	C	T	C	T	-0.144961	0.106857	0.0995551	0.0669697	FALSE	FALSE	FALSE	KIRC	49772319	0.148034	0.0738723	outcome	TRUE	reported	380248	378749	1499	3	49809752	0.0198411	2.7478941531024e-13	31146	NA	NA	eqtl-a-ENSG00000007402	TRUE	reported	eqtl-a-ENSG00000007402	rs115770773	2.7478941531024e-13	2	1	TRUE	-0.0413644	53.3790524994509	CACNA2D2	ENSG00000007402
175	eqtl-a-ENSG00000007402	rs11919195	G	A	G	A	-0.196031	0.00409683	0.116196	0.122662	FALSE	FALSE	FALSE	KIRC	51024971	0.941965	0.0562746	outcome	TRUE	reported	380248	378749	1499	3	51062402	0.0184991	3.07680519375974e-26	31569	NA	NA	eqtl-a-ENSG00000007402	TRUE	reported	eqtl-a-ENSG00000007402	rs11919195	3.07680519375974e-26	2	1	TRUE	-0.0595369	112.291869070222	CACNA2D2	ENSG00000007402
176	eqtl-a-ENSG00000007402	rs11920441	C	T	C	T	-0.0774385	-0.00680728	0.342478	0.305272	FALSE	FALSE	FALSE	KIRC	51062589	0.864631	0.0399296	outcome	TRUE	reported	380248	378749	1499	3	51100020	0.0125252	6.30536163554598e-10	31684	NA	NA	eqtl-a-ENSG00000007402	TRUE	reported	eqtl-a-ENSG00000007402	rs11920441	6.30536163554598e-10	2	1	TRUE	-0.034714	38.2247387048185	CACNA2D2	ENSG00000007402
177	eqtl-a-ENSG00000007402	rs11928389	C	T	C	T	0.0812638	-0.00887076	0.662126	0.72686	FALSE	FALSE	FALSE	KIRC	50889578	0.829443	0.0411797	outcome	TRUE	reported	380248	378749	1499	3	50927009	0.0125648	9.94489037154793e-11	31684	NA	NA	eqtl-a-ENSG00000007402	TRUE	reported	eqtl-a-ENSG00000007402	rs11928389	9.94489037154793e-11	2	1	TRUE	0.0363118806840269	41.8295404226679	CACNA2D2	ENSG00000007402
178	eqtl-a-ENSG00000007402	rs13073141	C	T	C	T	-0.13156	0.0153201	0.154902	0.147867	FALSE	FALSE	FALSE	KIRC	51373054	0.767506	0.0518202	outcome	TRUE	reported	380248	378749	1499	3	51410485	0.0164125	1.09244605322679e-15	14263	NA	NA	eqtl-a-ENSG00000007402	TRUE	reported	eqtl-a-ENSG00000007402	rs13073141	1.09244605322679e-15	2	1	TRUE	-0.0669727	64.2537163023233	CACNA2D2	ENSG00000007402
179	eqtl-a-ENSG00000007402	rs13080170	G	A	G	A	-0.0754251	-0.0858857	0.837114	0.851479	FALSE	FALSE	FALSE	KIRC	51076926	0.0957084	0.0515512	outcome	TRUE	reported	380248	378749	1499	3	51114357	0.0161055	2.82709237984202e-06	31569	NA	NA	eqtl-a-ENSG00000007402	TRUE	reported	eqtl-a-ENSG00000007402	rs13080170	2.82709237984202e-06	2	1	TRUE	-0.0263496	21.9322589541236	CACNA2D2	ENSG00000007402
180	eqtl-a-ENSG00000007402	rs13095697	A	G	A	G	-0.0651099	0.000139995	0.232878	0.202093	FALSE	FALSE	FALSE	KIRC	50099030	0.997583	0.0462053	outcome	TRUE	reported	380248	378749	1499	3	50136463	0.0140708	3.70279782537947e-06	31561	NA	NA	eqtl-a-ENSG00000007402	TRUE	reported	eqtl-a-ENSG00000007402	rs13095697	3.70279782537947e-06	2	1	TRUE	-0.0260387	21.4119626166251	CACNA2D2	ENSG00000007402
181	eqtl-a-ENSG00000007402	rs1458385	G	A	G	A	-0.0780164	-0.0742051	0.842102	0.853886	FALSE	FALSE	FALSE	KIRC	50838693	0.152772	0.0518986	outcome	TRUE	reported	380248	378749	1499	3	50876124	0.0163088	1.72178928183355e-06	31684	NA	NA	eqtl-a-ENSG00000007402	TRUE	reported	eqtl-a-ENSG00000007402	rs1458385	1.72178928183355e-06	2	1	TRUE	-0.0268659	22.8837818416395	CACNA2D2	ENSG00000007402
182	eqtl-a-ENSG00000007402	rs1491983	T	G	T	G	0.0770759	-0.0870809	0.844666	0.89519	FALSE	FALSE	FALSE	KIRC	49602370	0.147218	0.0600795	outcome	TRUE	reported	380248	378749	1499	3	49639803	0.0164183	2.67128361316782e-06	31563	NA	NA	eqtl-a-ENSG00000007402	TRUE	reported	eqtl-a-ENSG00000007402	rs1491983	2.67128361316782e-06	2	1	TRUE	0.0264157814732426	22.0384392756034	CACNA2D2	ENSG00000007402
183	eqtl-a-ENSG00000007402	rs1532204	G	C	G	C	0.075368	-0.090674	0.845155	0.894626	FALSE	TRUE	FALSE	KIRC	49572044	0.130477	0.0599607	outcome	TRUE	reported	380248	378749	1499	3	49609477	0.0164401	4.55291979740049e-06	31566	NA	NA	eqtl-a-ENSG00000007402	TRUE	reported	eqtl-a-ENSG00000007402	rs1532204	4.55291979740049e-06	2	1	TRUE	0.0257953829875559	21.016726460865	CACNA2D2	ENSG00000007402
184	eqtl-a-ENSG00000007402	rs17598137	A	C	A	C	-0.142794	0.107137	0.0997514	0.0671012	FALSE	FALSE	FALSE	KIRC	49853929	0.147712	0.0740072	outcome	TRUE	reported	380248	378749	1499	3	49891362	0.0198247	5.88979257229024e-13	31225	NA	NA	eqtl-a-ENSG00000007402	TRUE	reported	eqtl-a-ENSG00000007402	rs17598137	5.88979257229024e-13	2	1	TRUE	-0.0407292	51.8808007733645	CACNA2D2	ENSG00000007402
185	eqtl-a-ENSG00000007402	rs1986599	G	T	G	T	-0.179837	0.0634796	0.103051	0.0618219	FALSE	FALSE	FALSE	KIRC	49997204	0.408241	0.0767596	outcome	TRUE	reported	380248	378749	1499	3	50034637	0.0195178	3.14195528464107e-20	31227	NA	NA	eqtl-a-ENSG00000007402	TRUE	reported	eqtl-a-ENSG00000007402	rs1986599	3.14195528464107e-20	2	1	TRUE	-0.0520724	84.8977873136934	CACNA2D2	ENSG00000007402
186	eqtl-a-ENSG00000007402	rs1996664	G	A	G	A	-0.0790792	0.110473	0.166761	0.108143	FALSE	FALSE	FALSE	KIRC	49840962	0.0627784	0.0593701	outcome	TRUE	reported	380248	378749	1499	3	49878395	0.0159527	7.15154704659282e-07	31568	NA	NA	eqtl-a-ENSG00000007402	TRUE	reported	eqtl-a-ENSG00000007402	rs1996664	7.15154704659282e-07	2	1	TRUE	-0.0278901	24.5728844290752	CACNA2D2	ENSG00000007402
187	eqtl-a-ENSG00000007402	rs201198	A	G	A	G	-0.0804687	-0.102501	0.868499	0.865686	FALSE	FALSE	FALSE	KIRC	50598680	0.0561332	0.0536656	outcome	TRUE	reported	380248	378749	1499	3	50636111	0.0175984	4.82169793900618e-06	31569	NA	NA	eqtl-a-ENSG00000007402	TRUE	reported	eqtl-a-ENSG00000007402	rs201198	4.82169793900618e-06	2	1	TRUE	-0.0257273	20.907764564393	CACNA2D2	ENSG00000007402
188	eqtl-a-ENSG00000007402	rs2085588	G	C	G	C	-0.0840991	-0.0933951	0.87517	0.872363	FALSE	TRUE	FALSE	KIRC	50817160	0.0885116	0.0548317	outcome	TRUE	reported	380248	378749	1499	3	50854591	0.017993	2.95678672700849e-06	31567	NA	NA	eqtl-a-ENSG00000007402	TRUE	reported	eqtl-a-ENSG00000007402	rs2085588	2.95678672700849e-06	2	1	TRUE	-0.0262987	21.8461814446641	CACNA2D2	ENSG00000007402
189	eqtl-a-ENSG00000007402	rs2131108	A	G	A	G	0.0798754	-0.106547	0.833189	0.891506	FALSE	FALSE	FALSE	KIRC	49627957	0.0719664	0.0592147	outcome	TRUE	reported	380248	378749	1499	3	49665390	0.0159505	5.50554098484795e-07	31569	NA	NA	eqtl-a-ENSG00000007402	TRUE	reported	eqtl-a-ENSG00000007402	rs2131108	5.50554098484795e-07	2	1	TRUE	0.0281740742121742	25.0771102445232	CACNA2D2	ENSG00000007402
190	eqtl-a-ENSG00000007402	rs2230593	T	C	T	C	-0.167014	0.00552194	0.0687182	0.0407742	FALSE	FALSE	FALSE	KIRC	49902645	0.953003	0.0936934	outcome	TRUE	reported	380248	378749	1499	3	49940078	0.0234851	1.14709661977356e-12	26685	NA	NA	eqtl-a-ENSG00000007402	TRUE	reported	eqtl-a-ENSG00000007402	rs2230593	1.14709661977356e-12	2	1	TRUE	-0.0434943	50.5732574385067	CACNA2D2	ENSG00000007402
191	eqtl-a-ENSG00000007402	rs2355697	A	G	A	G	-0.0772536	-0.0838181	0.842638	0.85888	FALSE	FALSE	FALSE	KIRC	50828675	0.111218	0.052625	outcome	TRUE	reported	380248	378749	1499	3	50866106	0.0163317	2.243003751728e-06	31568	NA	NA	eqtl-a-ENSG00000007402	TRUE	reported	eqtl-a-ENSG00000007402	rs2355697	2.243003751728e-06	2	1	TRUE	-0.0266148	22.3755987679843	CACNA2D2	ENSG00000007402
192	eqtl-a-ENSG00000007402	rs2526384	T	C	T	C	-0.0723288	0.0211225	0.294087	0.260681	FALSE	FALSE	FALSE	KIRC	50143703	0.615276	0.04203	outcome	TRUE	reported	380248	378749	1499	3	50181136	0.0130484	2.9698875105511e-08	27400	NA	NA	eqtl-a-ENSG00000007402	TRUE	reported	eqtl-a-ENSG00000007402	rs2526384	2.9698875105511e-08	2	1	TRUE	-0.0334697	30.7261393952657	CACNA2D2	ENSG00000007402
193	eqtl-a-ENSG00000007402	rs2526390	T	C	T	C	-0.073187	0.0202546	0.299219	0.260119	FALSE	FALSE	FALSE	KIRC	50155327	0.629959	0.0420407	outcome	TRUE	reported	380248	378749	1499	3	50192760	0.0129829	1.72838305558137e-08	30817	NA	NA	eqtl-a-ENSG00000007402	TRUE	reported	eqtl-a-ENSG00000007402	rs2526390	1.72838305558137e-08	2	1	TRUE	-0.0320965	31.7778467900751	CACNA2D2	ENSG00000007402
194	eqtl-a-ENSG00000007402	rs2624838	G	C	G	C	-0.0719144	0.011542	0.324568	0.303238	FALSE	TRUE	FALSE	KIRC	50168209	0.773888	0.0401753	outcome	TRUE	reported	380248	378749	1499	3	50205642	0.0126972	1.47880190036315e-08	27283	NA	NA	eqtl-a-ENSG00000007402	TRUE	reported	eqtl-a-ENSG00000007402	rs2624838	1.47880190036315e-08	2	1	TRUE	-0.0342707	32.0786292266982	CACNA2D2	ENSG00000007402
195	eqtl-a-ENSG00000007402	rs3020779	C	T	C	T	0.078639	-0.106535	0.836275	0.891501	FALSE	FALSE	FALSE	KIRC	49687375	0.0719979	0.0592146	outcome	TRUE	reported	380248	378749	1499	3	49724808	0.0160711	9.91082938913112e-07	31473	NA	NA	eqtl-a-ENSG00000007402	TRUE	reported	eqtl-a-ENSG00000007402	rs3020779	9.91082938913112e-07	2	1	TRUE	0.0275722344750747	23.9433413753285	CACNA2D2	ENSG00000007402
196	eqtl-a-ENSG00000007402	rs35129566	G	T	G	T	-0.0797684	0.109656	0.166755	0.10825	FALSE	FALSE	FALSE	KIRC	49829151	0.0646041	0.0593384	outcome	TRUE	reported	380248	378749	1499	3	49866584	0.0159527	5.72110607378541e-07	31569	NA	NA	eqtl-a-ENSG00000007402	TRUE	reported	eqtl-a-ENSG00000007402	rs35129566	5.72110607378541e-07	2	1	TRUE	-0.0281325	25.0030716747055	CACNA2D2	ENSG00000007402
197	eqtl-a-ENSG00000007402	rs35375092	A	G	A	G	-0.0650593	0.000132672	0.23494	0.202092	FALSE	FALSE	FALSE	KIRC	50027841	0.997709	0.0462044	outcome	TRUE	reported	380248	378749	1499	3	50065274	0.0140277	3.51803373773702e-06	31569	NA	NA	eqtl-a-ENSG00000007402	TRUE	reported	eqtl-a-ENSG00000007402	rs35375092	3.51803373773702e-06	2	1	TRUE	-0.0260951	21.5102686099089	CACNA2D2	ENSG00000007402
198	eqtl-a-ENSG00000007402	rs41291734	T	C	T	C	-0.248827	-0.0480315	0.0308668	0.0330674	FALSE	FALSE	FALSE	KIRC	50476182	0.640699	0.102912	outcome	TRUE	reported	380248	378749	1499	3	50513613	0.034348	4.34310170886093e-13	26684	NA	NA	eqtl-a-ENSG00000007402	TRUE	reported	eqtl-a-ENSG00000007402	rs41291734	4.34310170886093e-13	2	1	TRUE	-0.0443058	52.4797912086539	CACNA2D2	ENSG00000007402
199	eqtl-a-ENSG00000007402	rs4130897	T	C	T	C	-0.183941	0.0296322	0.108777	0.0874415	FALSE	FALSE	FALSE	KIRC	50850431	0.645593	0.0644329	outcome	TRUE	reported	380248	378749	1499	3	50887862	0.0190526	4.70868892344272e-22	30163	NA	NA	eqtl-a-ENSG00000007402	TRUE	reported	eqtl-a-ENSG00000007402	rs4130897	4.70868892344272e-22	2	1	TRUE	-0.0555049	93.2070122533925	CACNA2D2	ENSG00000007402
200	eqtl-a-ENSG00000007402	rs4346541	C	T	C	T	0.0800691	0.0758907	0.157466	0.146092	FALSE	FALSE	FALSE	KIRC	50873068	0.143624	0.0518937	outcome	TRUE	reported	380248	378749	1499	3	50910499	0.0163263	9.3808026602519e-07	31684	NA	NA	eqtl-a-ENSG00000007402	TRUE	reported	eqtl-a-ENSG00000007402	rs4346541	9.3808026602519e-07	2	1	TRUE	0.0275426732197266	24.0521746571334	CACNA2D2	ENSG00000007402
201	eqtl-a-ENSG00000007402	rs55672941	A	G	A	G	-0.201717	0.0414949	0.115819	0.0905183	FALSE	FALSE	FALSE	KIRC	50690323	0.513022	0.0634344	outcome	TRUE	reported	380248	378749	1499	3	50727754	0.0185211	1.26677650534463e-27	31569	NA	NA	eqtl-a-ENSG00000007402	TRUE	reported	eqtl-a-ENSG00000007402	rs55672941	1.26677650534463e-27	2	1	TRUE	-0.061185	118.61823235931	CACNA2D2	ENSG00000007402
202	eqtl-a-ENSG00000007402	rs55689339	G	C	G	C	-0.210134	0.0314254	0.0512284	0.0402702	FALSE	TRUE	FALSE	KIRC	50270609	0.737741	0.0938501	outcome	TRUE	reported	380248	378749	1499	3	50308040	0.0269386	6.16169220200278e-15	27055	NA	NA	eqtl-a-ENSG00000007402	TRUE	reported	eqtl-a-ENSG00000007402	rs55689339	6.16169220200278e-15	2	1	TRUE	-0.0473724	60.8474821333162	CACNA2D2	ENSG00000007402
203	eqtl-a-ENSG00000007402	rs55754265	T	C	T	C	-0.111003	0.111088	0.135662	0.0930922	FALSE	FALSE	FALSE	KIRC	49650053	0.079816	0.063415	outcome	TRUE	reported	380248	378749	1499	3	49687486	0.0173558	1.5970922417516e-10	31560	NA	NA	eqtl-a-ENSG00000007402	TRUE	reported	eqtl-a-ENSG00000007402	rs55754265	1.5970922417516e-10	2	1	TRUE	-0.0359794	40.9053543217968	CACNA2D2	ENSG00000007402
204	eqtl-a-ENSG00000007402	rs55798953	C	G	C	G	-0.132026	-0.0140361	0.11698	0.11875	FALSE	TRUE	FALSE	KIRC	51422580	0.805808	0.0570951	outcome	TRUE	reported	380248	378749	1499	3	51460031	0.018485	9.17064749114933e-13	13015	NA	NA	eqtl-a-ENSG00000007402	TRUE	reported	eqtl-a-ENSG00000007402	rs55798953	9.17064749114933e-13	2	1	TRUE	-0.0624887	51.0129009733747	CACNA2D2	ENSG00000007402
205	eqtl-a-ENSG00000007402	rs55852549	C	G	C	G	-0.199809	0.041999	0.116309	0.0898082	FALSE	TRUE	FALSE	KIRC	50632224	0.509324	0.0636453	outcome	TRUE	reported	380248	378749	1499	3	50669655	0.0184883	3.17541140289183e-27	31569	NA	NA	eqtl-a-ENSG00000007402	TRUE	reported	eqtl-a-ENSG00000007402	rs55852549	3.17541140289183e-27	2	1	TRUE	-0.0607155	116.798195562759	CACNA2D2	ENSG00000007402
206	eqtl-a-ENSG00000007402	rs55913858	T	G	T	G	-0.198993	0.039452	0.115846	0.0899946	FALSE	FALSE	FALSE	KIRC	50554928	0.535054	0.0636006	outcome	TRUE	reported	380248	378749	1499	3	50592359	0.0185213	6.32411851376217e-27	31567	NA	NA	eqtl-a-ENSG00000007402	TRUE	reported	eqtl-a-ENSG00000007402	rs55913858	6.32411851376217e-27	2	1	TRUE	-0.060363	115.433713275227	CACNA2D2	ENSG00000007402
207	eqtl-a-ENSG00000007402	rs55935606	G	A	G	A	-0.0761637	0.0654178	0.190553	0.163221	FALSE	FALSE	FALSE	KIRC	49528072	0.187639	0.0496493	outcome	TRUE	reported	380248	378749	1499	3	49565505	0.015141	4.89463149065128e-07	31569	NA	NA	eqtl-a-ENSG00000007402	TRUE	reported	eqtl-a-ENSG00000007402	rs55935606	4.89463149065128e-07	2	1	TRUE	-0.0283011	25.3038700495116	CACNA2D2	ENSG00000007402
208	eqtl-a-ENSG00000007402	rs55966607	A	C	A	C	-0.180769	-0.00454587	0.109187	0.119523	FALSE	FALSE	FALSE	KIRC	51042609	0.93636	0.0569331	outcome	TRUE	reported	380248	378749	1499	3	51080040	0.0190231	2.04314881451718e-21	30165	NA	NA	eqtl-a-ENSG00000007402	TRUE	reported	eqtl-a-ENSG00000007402	rs55966607	2.04314881451718e-21	2	1	TRUE	-0.0546332	90.2994966153923	CACNA2D2	ENSG00000007402
209	eqtl-a-ENSG00000007402	rs56049603	G	C	G	C	-0.0675072	0.0708864	0.227587	0.188097	FALSE	TRUE	FALSE	KIRC	49547810	0.131622	0.0470151	outcome	TRUE	reported	380248	378749	1499	3	49585243	0.014184	1.94169047419996e-06	31566	NA	NA	eqtl-a-ENSG00000007402	TRUE	reported	eqtl-a-ENSG00000007402	rs56049603	1.94169047419996e-06	2	1	TRUE	-0.0267793	22.6518013862764	CACNA2D2	ENSG00000007402
210	eqtl-a-ENSG00000007402	rs56176327	C	G	C	G	-0.142352	0.117619	0.0965812	0.0681692	FALSE	TRUE	FALSE	KIRC	49669303	0.108267	0.0732358	outcome	TRUE	reported	380248	378749	1499	3	49706736	0.0201134	1.46656055527827e-12	30727	NA	NA	eqtl-a-ENSG00000007402	TRUE	reported	eqtl-a-ENSG00000007402	rs56176327	1.46656055527827e-12	2	1	TRUE	-0.0403439	50.0905920882829	CACNA2D2	ENSG00000007402
211	eqtl-a-ENSG00000007402	rs56324858	G	A	G	A	-0.0671036	0.071153	0.226473	0.187982	FALSE	FALSE	FALSE	KIRC	49506796	0.130428	0.0470459	outcome	TRUE	reported	380248	378749	1499	3	49544229	0.0142087	2.32621579361048e-06	31566	NA	NA	eqtl-a-ENSG00000007402	TRUE	reported	eqtl-a-ENSG00000007402	rs56324858	2.32621579361048e-06	2	1	TRUE	-0.0265731	22.3040099681935	CACNA2D2	ENSG00000007402
212	eqtl-a-ENSG00000007402	rs62257529	G	T	G	T	-0.183882	-0.0416208	0.0469743	0.0328889	FALSE	FALSE	FALSE	KIRC	51361351	0.685813	0.102883	outcome	TRUE	reported	380248	378749	1499	3	51398782	0.0280869	5.87083669396272e-11	28673	NA	NA	eqtl-a-ENSG00000007402	TRUE	reported	eqtl-a-ENSG00000007402	rs62257529	5.87083669396272e-11	2	1	TRUE	-0.0386358	42.8618410520368	CACNA2D2	ENSG00000007402
213	eqtl-a-ENSG00000007402	rs62257830	T	C	T	C	-0.180538	0.0296033	0.109479	0.087452	FALSE	FALSE	FALSE	KIRC	50944733	0.645969	0.0644436	outcome	TRUE	reported	380248	378749	1499	3	50982164	0.0190008	2.0630036673107e-21	30162	NA	NA	eqtl-a-ENSG00000007402	TRUE	reported	eqtl-a-ENSG00000007402	rs62257830	2.0630036673107e-21	2	1	TRUE	-0.0546301	90.2804012798383	CACNA2D2	ENSG00000007402
214	eqtl-a-ENSG00000007402	rs62258668	A	G	A	G	-0.0674508	0.0122694	0.330009	0.273159	FALSE	FALSE	FALSE	KIRC	50803118	0.765768	0.0411841	outcome	TRUE	reported	380248	378749	1499	3	50840549	0.0126447	9.58605684466191e-08	27485	NA	NA	eqtl-a-ENSG00000007402	TRUE	reported	eqtl-a-ENSG00000007402	rs62258668	9.58605684466191e-08	2	1	TRUE	-0.0321604	28.454905651646	CACNA2D2	ENSG00000007402
215	eqtl-a-ENSG00000007402	rs62260153	C	T	C	T	-0.190201	0.034254	0.105872	0.0871285	FALSE	FALSE	FALSE	KIRC	50740521	0.595539	0.0645295	outcome	TRUE	reported	380248	378749	1499	3	50777952	0.019278	5.8331077653942e-23	30162	NA	NA	eqtl-a-ENSG00000007402	TRUE	reported	eqtl-a-ENSG00000007402	rs62260153	5.8331077653942e-23	2	1	TRUE	-0.0567199	97.3423081839315	CACNA2D2	ENSG00000007402
216	eqtl-a-ENSG00000007402	rs62260158	T	C	T	C	-0.199345	0.0433275	0.115813	0.0903595	FALSE	FALSE	FALSE	KIRC	50756972	0.494979	0.0634919	outcome	TRUE	reported	380248	378749	1499	3	50794403	0.0185233	5.21434785414456e-27	31566	NA	NA	eqtl-a-ENSG00000007402	TRUE	reported	eqtl-a-ENSG00000007402	rs62260158	5.21434785414456e-27	2	1	TRUE	-0.0604638	115.817443188008	CACNA2D2	ENSG00000007402
217	eqtl-a-ENSG00000007402	rs62260389	G	T	G	T	-0.149435	0.0337184	0.15239	0.157576	FALSE	FALSE	FALSE	KIRC	51126011	0.505216	0.0506051	outcome	TRUE	reported	380248	378749	1499	3	51163442	0.0165125	1.43218789927354e-19	30162	NA	NA	eqtl-a-ENSG00000007402	TRUE	reported	eqtl-a-ENSG00000007402	rs62260389	1.43218789927354e-19	2	1	TRUE	-0.0520397	81.8990746005395	CACNA2D2	ENSG00000007402
218	eqtl-a-ENSG00000007402	rs62260720	A	T	A	T	-0.0796279	0.109615	0.166415	0.108247	FALSE	TRUE	FALSE	KIRC	49816363	0.0646964	0.0593363	outcome	TRUE	reported	380248	378749	1499	3	49853796	0.0159658	6.11336040787421e-07	31569	NA	NA	eqtl-a-ENSG00000007402	TRUE	reported	eqtl-a-ENSG00000007402	rs62260720	6.11336040787421e-07	2	1	TRUE	-0.0280599	24.8742019184689	CACNA2D2	ENSG00000007402
219	eqtl-a-ENSG00000007402	rs62260802	A	G	A	G	-0.206268	0.0491119	0.0893325	0.057383	FALSE	FALSE	FALSE	KIRC	50303640	0.533423	0.0788581	outcome	TRUE	reported	380248	378749	1499	3	50341071	0.0207946	3.42846720833313e-23	28717	NA	NA	eqtl-a-ENSG00000007402	TRUE	reported	eqtl-a-ENSG00000007402	rs62260802	3.42846720833313e-23	2	1	TRUE	-0.0584365	98.3926309992108	CACNA2D2	ENSG00000007402
220	eqtl-a-ENSG00000007402	rs62260810	A	G	A	G	-0.203643	0.0584763	0.109383	0.0631187	FALSE	FALSE	FALSE	KIRC	50390185	0.438315	0.0754492	outcome	TRUE	reported	380248	378749	1499	3	50427616	0.0189916	7.93779721690116e-27	31569	NA	NA	eqtl-a-ENSG00000007402	TRUE	reported	eqtl-a-ENSG00000007402	rs62260810	7.93779721690116e-27	2	1	TRUE	-0.0602423	114.978	CACNA2D2	ENSG00000007402
221	eqtl-a-ENSG00000007402	rs62260815	A	G	A	G	-0.212532	0.0186752	0.10795	0.060119	FALSE	FALSE	FALSE	KIRC	50437193	0.808504	0.077057	outcome	TRUE	reported	380248	378749	1499	3	50474624	0.0190959	8.98462592570682e-29	31564	NA	NA	eqtl-a-ENSG00000007402	TRUE	reported	eqtl-a-ENSG00000007402	rs62260815	8.98462592570682e-29	2	1	TRUE	-0.0625247	123.870643792564	CACNA2D2	ENSG00000007402
222	eqtl-a-ENSG00000007402	rs62261860	T	C	T	C	-0.0829849	0.0120415	0.336982	0.273155	FALSE	FALSE	FALSE	KIRC	50786784	0.770004	0.0411856	outcome	TRUE	reported	380248	378749	1499	3	50824215	0.0125721	4.08978050102884e-11	31566	NA	NA	eqtl-a-ENSG00000007402	TRUE	reported	eqtl-a-ENSG00000007402	rs62261860	4.08978050102884e-11	2	1	TRUE	-0.0371275	43.5694920101045	CACNA2D2	ENSG00000007402
223	eqtl-a-ENSG00000007402	rs62262061	A	G	A	G	-0.0835272	-0.0168326	0.186306	0.159299	FALSE	FALSE	FALSE	KIRC	49880253	0.741336	0.0509948	outcome	TRUE	reported	380248	378749	1499	3	49917686	0.0152701	4.50038843526308e-08	27479	NA	NA	eqtl-a-ENSG00000007402	TRUE	reported	eqtl-a-ENSG00000007402	rs62262061	4.50038843526308e-08	2	1	TRUE	-0.0329811	29.9207230413681	CACNA2D2	ENSG00000007402
224	eqtl-a-ENSG00000007402	rs62262097	A	G	A	G	-0.183163	0.0652452	0.101869	0.0611154	FALSE	FALSE	FALSE	KIRC	49932877	0.397728	0.0771506	outcome	TRUE	reported	380248	378749	1499	3	49970310	0.0196163	9.87188301068394e-21	31560	NA	NA	eqtl-a-ENSG00000007402	TRUE	reported	eqtl-a-ENSG00000007402	rs62262097	9.87188301068394e-21	2	1	TRUE	-0.0524888	87.1849066453874	CACNA2D2	ENSG00000007402
225	eqtl-a-ENSG00000007402	rs62262118	A	G	A	G	-0.0698728	0.00691792	0.229392	0.198282	FALSE	FALSE	FALSE	KIRC	49966153	0.882008	0.046609	outcome	TRUE	reported	380248	378749	1499	3	50003586	0.0141437	7.79614665266984e-07	31569	NA	NA	eqtl-a-ENSG00000007402	TRUE	reported	eqtl-a-ENSG00000007402	rs62262118	7.79614665266984e-07	2	1	TRUE	-0.0277946	24.4056411889157	CACNA2D2	ENSG00000007402
226	eqtl-a-ENSG00000007402	rs62262671	G	A	G	A	-0.109284	0.116657	0.135643	0.0932116	FALSE	FALSE	FALSE	KIRC	49612440	0.0653687	0.0633067	outcome	TRUE	reported	380248	378749	1499	3	49649873	0.0173576	3.05421777261214e-10	31560	NA	NA	eqtl-a-ENSG00000007402	TRUE	reported	eqtl-a-ENSG00000007402	rs62262671	3.05421777261214e-10	2	1	TRUE	-0.0354193	39.6400152864367	CACNA2D2	ENSG00000007402
227	eqtl-a-ENSG00000007402	rs62262721	C	T	C	T	-0.206738	-0.0559786	0.030957	0.0346176	FALSE	FALSE	FALSE	KIRC	49731494	0.576233	0.100159	outcome	TRUE	reported	380248	378749	1499	3	49768927	0.0343191	1.69949542574133e-09	26621	NA	NA	eqtl-a-ENSG00000007402	TRUE	reported	eqtl-a-ENSG00000007402	rs62262721	1.69949542574133e-09	2	1	TRUE	-0.0368971	36.2884852866289	CACNA2D2	ENSG00000007402
228	eqtl-a-ENSG00000007402	rs62262960	G	A	G	A	-0.193104	0.0323302	0.108054	0.0893634	FALSE	FALSE	FALSE	KIRC	50509306	0.613783	0.0640607	outcome	TRUE	reported	380248	378749	1499	3	50546737	0.0191024	5.03964563612644e-24	30155	NA	NA	eqtl-a-ENSG00000007402	TRUE	reported	eqtl-a-ENSG00000007402	rs62262960	5.03964563612644e-24	2	1	TRUE	-0.058117	102.18959317312	CACNA2D2	ENSG00000007402
229	eqtl-a-ENSG00000007402	rs62262965	T	C	T	C	-0.199411	0.038517	0.115974	0.0900633	FALSE	FALSE	FALSE	KIRC	50576462	0.544519	0.0635601	outcome	TRUE	reported	380248	378749	1499	3	50613893	0.018512	4.66766844979403e-27	31568	NA	NA	eqtl-a-ENSG00000007402	TRUE	reported	eqtl-a-ENSG00000007402	rs62262965	4.66766844979403e-27	2	1	TRUE	-0.0605186	116.035676760791	CACNA2D2	ENSG00000007402
230	eqtl-a-ENSG00000007402	rs62263042	A	G	A	G	-0.20074	0.043207	0.116177	0.0903709	FALSE	FALSE	FALSE	KIRC	50666701	0.49611	0.0634815	outcome	TRUE	reported	380248	378749	1499	3	50704132	0.0184968	1.93419385861928e-27	31569	NA	NA	eqtl-a-ENSG00000007402	TRUE	reported	eqtl-a-ENSG00000007402	rs62263042	1.93419385861928e-27	2	1	TRUE	-0.0609694	117.780837531301	CACNA2D2	ENSG00000007402
231	eqtl-a-ENSG00000007402	rs62263602	T	C	T	C	-0.067215	0.00231425	0.231243	0.201607	FALSE	FALSE	FALSE	KIRC	50115058	0.960099	0.0462578	outcome	TRUE	reported	380248	378749	1499	3	50152491	0.0141048	1.88482051441307e-06	31558	NA	NA	eqtl-a-ENSG00000007402	TRUE	reported	eqtl-a-ENSG00000007402	rs62263602	1.88482051441307e-06	2	1	TRUE	-0.0268165	22.7090277540728	CACNA2D2	ENSG00000007402
232	eqtl-a-ENSG00000007402	rs6772197	A	G	A	G	-0.0747666	-0.0862181	0.837066	0.851474	FALSE	FALSE	FALSE	KIRC	51114368	0.0944126	0.0515484	outcome	TRUE	reported	380248	378749	1499	3	51151799	0.0161038	3.43716198617535e-06	31684	NA	NA	eqtl-a-ENSG00000007402	TRUE	reported	eqtl-a-ENSG00000007402	rs6772197	3.43716198617535e-06	2	1	TRUE	-0.0260751	21.5555211246999	CACNA2D2	ENSG00000007402
233	eqtl-a-ENSG00000007402	rs6787892	A	G	A	G	-0.0647384	0.00704979	0.234194	0.198257	FALSE	FALSE	FALSE	KIRC	50008679	0.879778	0.0466099	outcome	TRUE	reported	380248	378749	1499	3	50046112	0.0140433	4.02670672482316e-06	31568	NA	NA	eqtl-a-ENSG00000007402	TRUE	reported	eqtl-a-ENSG00000007402	rs6787892	4.02670672482316e-06	2	1	TRUE	-0.025938	21.2513	CACNA2D2	ENSG00000007402
234	eqtl-a-ENSG00000007402	rs6799240	A	G	A	G	-0.192426	0.00363542	0.117346	0.122637	FALSE	FALSE	FALSE	KIRC	51097653	0.948492	0.0562756	outcome	TRUE	reported	380248	378749	1499	3	51135084	0.0184223	1.53815464030304e-25	31565	NA	NA	eqtl-a-ENSG00000007402	TRUE	reported	eqtl-a-ENSG00000007402	rs6799240	1.53815464030304e-25	2	1	TRUE	-0.0586923	109.10378158218	CACNA2D2	ENSG00000007402
235	eqtl-a-ENSG00000007402	rs6807194	G	A	G	A	0.0816043	-0.0318444	0.697766	0.743129	FALSE	FALSE	FALSE	KIRC	50198940	0.451446	0.0422897	outcome	TRUE	reported	380248	378749	1499	3	50236373	0.0129422	2.87448469091984e-10	28795	NA	NA	eqtl-a-ENSG00000007402	TRUE	reported	eqtl-a-ENSG00000007402	rs6807194	2.87448469091984e-10	2	1	TRUE	0.0371331552741334	39.7566583671576	CACNA2D2	ENSG00000007402
236	eqtl-a-ENSG00000007402	rs6809879	G	A	G	A	-0.0765152	0.110154	0.165471	0.108029	FALSE	FALSE	FALSE	KIRC	49797138	0.0636517	0.0593946	outcome	TRUE	reported	380248	378749	1499	3	49834571	0.0160034	1.74080449729094e-06	31569	NA	NA	eqtl-a-ENSG00000007402	TRUE	reported	eqtl-a-ENSG00000007402	rs6809879	1.74080449729094e-06	2	1	TRUE	-0.0269006	22.8597204265595	CACNA2D2	ENSG00000007402
237	eqtl-a-ENSG00000007402	rs71326904	T	C	T	C	-0.0709249	0.00394579	0.228004	0.198928	FALSE	FALSE	FALSE	KIRC	49953627	0.932503	0.0465874	outcome	TRUE	reported	380248	378749	1499	3	49991060	0.0141736	5.60944636694182e-07	31568	NA	NA	eqtl-a-ENSG00000007402	TRUE	reported	eqtl-a-ENSG00000007402	rs71326904	5.60944636694182e-07	2	1	TRUE	-0.0281538	25.0401611746756	CACNA2D2	ENSG00000007402
238	eqtl-a-ENSG00000007402	rs7429494	G	A	G	A	0.193578	-0.042435	0.880578	0.909609	FALSE	FALSE	FALSE	KIRC	50930473	0.504004	0.0635062	outcome	TRUE	reported	380248	378749	1499	3	50967904	0.018281	3.35119731967709e-26	31561	NA	NA	eqtl-a-ENSG00000007402	TRUE	reported	eqtl-a-ENSG00000007402	rs7429494	3.35119731967709e-26	2	1	TRUE	0.0595010031356709	112.127489809758	CACNA2D2	ENSG00000007402
239	eqtl-a-ENSG00000007402	rs743856	C	T	C	T	0.0897739	0.0851537	0.137797	0.135861	FALSE	FALSE	FALSE	KIRC	50490443	0.114335	0.0539288	outcome	TRUE	reported	380248	378749	1499	3	50527874	0.0172506	1.95038343617071e-07	26233	NA	NA	eqtl-a-ENSG00000007402	TRUE	reported	eqtl-a-ENSG00000007402	rs743856	1.95038343617071e-07	2	1	TRUE	0.0321154773509522	27.0826885101721	CACNA2D2	ENSG00000007402
240	eqtl-a-ENSG00000007402	rs74461473	T	C	T	C	-0.189976	0.0437759	0.0944889	0.0595272	FALSE	FALSE	FALSE	KIRC	50213314	0.573383	0.0777442	outcome	TRUE	reported	380248	378749	1499	3	50250747	0.0202844	7.54744574900135e-21	28464	NA	NA	eqtl-a-ENSG00000007402	TRUE	reported	eqtl-a-ENSG00000007402	rs74461473	7.54744574900135e-21	2	1	TRUE	-0.0554288	87.7148543032701	CACNA2D2	ENSG00000007402
241	eqtl-a-ENSG00000007402	rs74976288	T	G	T	G	-0.188142	0.0348526	0.0718705	0.0450875	FALSE	FALSE	FALSE	KIRC	51229056	0.694423	0.0887151	outcome	TRUE	reported	380248	378749	1499	3	51266487	0.0229899	2.75042622303031e-16	28673	NA	NA	eqtl-a-ENSG00000007402	TRUE	reported	eqtl-a-ENSG00000007402	rs74976288	2.75042622303031e-16	2	1	TRUE	-0.0482748	66.9726291410606	CACNA2D2	ENSG00000007402
242	eqtl-a-ENSG00000007402	rs75848843	G	A	G	A	-0.198221	0.0430099	0.116177	0.0903636	FALSE	FALSE	FALSE	KIRC	50962745	0.498327	0.0635184	outcome	TRUE	reported	380248	378749	1499	3	51000176	0.0184987	8.61787122040416e-27	31569	NA	NA	eqtl-a-ENSG00000007402	TRUE	reported	eqtl-a-ENSG00000007402	rs75848843	8.61787122040416e-27	2	1	TRUE	-0.060201	114.819831938264	CACNA2D2	ENSG00000007402
243	eqtl-a-ENSG00000007402	rs7614482	G	A	G	A	-0.0825553	-0.0846588	0.840106	0.853372	FALSE	FALSE	FALSE	KIRC	50991733	0.102381	0.0518292	outcome	TRUE	reported	380248	378749	1499	3	51029164	0.0162242	3.61476442928671e-07	31677	NA	NA	eqtl-a-ENSG00000007402	TRUE	reported	eqtl-a-ENSG00000007402	rs7614482	3.61476442928671e-07	2	1	TRUE	-0.0285789	25.8918651924933	CACNA2D2	ENSG00000007402
244	eqtl-a-ENSG00000007402	rs7616183	G	A	G	A	0.0805531	0.0856258	0.156092	0.141101	FALSE	FALSE	FALSE	KIRC	50918941	0.103671	0.0526179	outcome	TRUE	reported	380248	378749	1499	3	50956372	0.0163846	8.82409144306058e-07	31569	NA	NA	eqtl-a-ENSG00000007402	TRUE	reported	eqtl-a-ENSG00000007402	rs7616183	8.82409144306058e-07	2	1	TRUE	0.0276607246581972	24.1709004777236	CACNA2D2	ENSG00000007402
245	eqtl-a-ENSG00000007402	rs7621797	A	G	A	G	-0.0808446	0.106991	0.16388	0.108512	FALSE	FALSE	FALSE	KIRC	49761431	0.0708125	0.0592198	outcome	TRUE	reported	380248	378749	1499	3	49798864	0.0160642	4.83871452152518e-07	31567	NA	NA	eqtl-a-ENSG00000007402	TRUE	reported	eqtl-a-ENSG00000007402	rs7621797	4.83871452152518e-07	2	1	TRUE	-0.0283149	25.3270045399924	CACNA2D2	ENSG00000007402
246	eqtl-a-ENSG00000007402	rs7625232	C	T	C	T	0.0786834	0.0855956	0.15579	0.141092	FALSE	FALSE	FALSE	KIRC	50904010	0.103794	0.0526182	outcome	TRUE	reported	380248	378749	1499	3	50941441	0.0163982	1.60099508996863e-06	31569	NA	NA	eqtl-a-ENSG00000007402	TRUE	reported	eqtl-a-ENSG00000007402	rs7625232	1.60099508996863e-06	2	1	TRUE	0.0269967797641982	23.0236342814225	CACNA2D2	ENSG00000007402
247	eqtl-a-ENSG00000007402	rs7628207	C	T	C	T	0.0807702	-0.106527	0.83239	0.8915	FALSE	FALSE	FALSE	KIRC	49717537	0.0720195	0.0592147	outcome	TRUE	reported	380248	378749	1499	3	49754970	0.0159197	3.90364216171537e-07	31565	NA	NA	eqtl-a-ENSG00000007402	TRUE	reported	eqtl-a-ENSG00000007402	rs7628207	3.90364216171537e-07	2	1	TRUE	0.0285463191850208	25.7414233849818	CACNA2D2	ENSG00000007402
248	eqtl-a-ENSG00000007402	rs7628500	C	A	C	A	-0.207216	0.0374418	0.113599	0.090686	FALSE	FALSE	FALSE	KIRC	50536936	0.557091	0.0637667	outcome	TRUE	reported	380248	378749	1499	3	50574367	0.0186748	1.31189778860963e-28	31224	NA	NA	eqtl-a-ENSG00000007402	TRUE	reported	eqtl-a-ENSG00000007402	rs7628500	1.31189778860963e-28	2	1	TRUE	-0.0626733	123.121714152366	CACNA2D2	ENSG00000007402
249	eqtl-a-ENSG00000007402	rs7637429	C	T	C	T	-0.201845	0.0432076	0.116177	0.0903699	FALSE	FALSE	FALSE	KIRC	50654741	0.4961	0.063481	outcome	TRUE	reported	380248	378749	1499	3	50692172	0.018496	9.99079389984464e-28	31569	NA	NA	eqtl-a-ENSG00000007402	TRUE	reported	eqtl-a-ENSG00000007402	rs7637429	9.99079389984464e-28	2	1	TRUE	-0.0613064	119.091388298045	CACNA2D2	ENSG00000007402
250	eqtl-a-ENSG00000007402	rs7944004	G	T	G	T	-0.0554241	0.00579148	0.511324	0.510896	FALSE	FALSE	FALSE	KIRC	2289922	0.875355	0.0369214	outcome	TRUE	reported	380248	378749	1499	11	2311152	0.0118974	3.18683809486971e-06	26096	NA	NA	eqtl-a-ENSG00000007402	TRUE	reported	eqtl-a-ENSG00000007402	rs7944004	3.18683809486971e-06	2	1	TRUE	-0.0288268	21.7016708812996	CACNA2D2	ENSG00000007402
251	eqtl-a-ENSG00000007402	rs80094684	C	T	C	T	-0.203469	0.00274736	0.0967748	0.0562796	FALSE	FALSE	FALSE	KIRC	50412873	0.972398	0.0794025	outcome	TRUE	reported	380248	378749	1499	3	50450304	0.020058	3.52370871042488e-24	30159	NA	NA	eqtl-a-ENSG00000007402	TRUE	reported	eqtl-a-ENSG00000007402	rs80094684	3.52370871042488e-24	2	1	TRUE	-0.0583145	102.901391431495	CACNA2D2	ENSG00000007402
252	eqtl-a-ENSG00000007402	rs9830082	A	T	A	T	-0.0785284	-0.0838181	0.843198	0.85888	FALSE	TRUE	FALSE	KIRC	50767542	0.111218	0.052625	outcome	TRUE	reported	380248	378749	1499	3	50804973	0.016355	1.57561461296533e-06	31567	NA	NA	eqtl-a-ENSG00000007402	TRUE	reported	eqtl-a-ENSG00000007402	rs9830082	1.57561461296533e-06	2	1	TRUE	-0.0270156	23.0543244513802	CACNA2D2	ENSG00000007402
253	eqtl-a-ENSG00000007402	rs9830730	C	G	C	G	0.0811286	-0.10685	0.833239	0.891531	FALSE	TRUE	FALSE	KIRC	49638442	0.0711934	0.0592214	outcome	TRUE	reported	380248	378749	1499	3	49675875	0.015952	3.65687402784007e-07	31568	NA	NA	eqtl-a-ENSG00000007402	TRUE	reported	eqtl-a-ENSG00000007402	rs9830730	3.65687402784007e-07	2	1	TRUE	0.0286135146379756	25.8653096087724	CACNA2D2	ENSG00000007402
254	eqtl-a-ENSG00000007402	rs9836756	A	G	A	G	-0.0799019	0.110093	0.166698	0.108277	FALSE	FALSE	FALSE	KIRC	49785476	0.0634878	0.0593247	outcome	TRUE	reported	380248	378749	1499	3	49822909	0.0159548	5.49414351962141e-07	31569	NA	NA	eqtl-a-ENSG00000007402	TRUE	reported	eqtl-a-ENSG00000007402	rs9836756	5.49414351962141e-07	2	1	TRUE	-0.0281758	25.080228225806	CACNA2D2	ENSG00000007402
255	eqtl-a-ENSG00000007402	rs9838433	C	T	C	T	-0.0805842	-0.0841904	0.843035	0.853296	FALSE	FALSE	FALSE	KIRC	50979873	0.104164	0.0518097	outcome	TRUE	reported	380248	378749	1499	3	51017304	0.0163473	8.24821551564366e-07	31565	NA	NA	eqtl-a-ENSG00000007402	TRUE	reported	eqtl-a-ENSG00000007402	rs9838433	8.24821551564366e-07	2	1	TRUE	-0.0277362	24.3000816119029	CACNA2D2	ENSG00000007402
256	eqtl-a-ENSG00000007402	rs9858297	C	T	C	T	0.076785	-0.0298998	0.693179	0.7436	FALSE	FALSE	FALSE	KIRC	50181446	0.479057	0.042242	outcome	TRUE	reported	380248	378749	1499	3	50218879	0.0128894	2.56277217474192e-09	28284	NA	NA	eqtl-a-ENSG00000007402	TRUE	reported	eqtl-a-ENSG00000007402	rs9858297	2.56277217474192e-09	2	1	TRUE	0.0354010644645931	35.4884780150361	CACNA2D2	ENSG00000007402
257	eqtl-a-ENSG00000007402	rs9869256	G	T	G	T	0.0765276	-0.0891898	0.846463	0.894496	FALSE	FALSE	FALSE	KIRC	49586662	0.136628	0.0599206	outcome	TRUE	reported	380248	378749	1499	3	49624095	0.0164969	3.50098298442479e-06	31567	NA	NA	eqtl-a-ENSG00000007402	TRUE	reported	eqtl-a-ENSG00000007402	rs9869256	3.50098298442479e-06	2	1	TRUE	0.0261014638743204	21.5194666534309	CACNA2D2	ENSG00000007402
258	eqtl-a-ENSG00000007402	rs9877272	C	A	C	A	-0.0798498	-0.0858765	0.838719	0.851485	FALSE	FALSE	FALSE	KIRC	51013864	0.0957459	0.0515516	outcome	TRUE	reported	380248	378749	1499	3	51051295	0.0161685	7.86846468549314e-07	31566	NA	NA	eqtl-a-ENSG00000007402	TRUE	reported	eqtl-a-ENSG00000007402	rs9877272	7.86846468549314e-07	2	1	TRUE	-0.0277869	24.3897979999301	CACNA2D2	ENSG00000007402
259	eqtl-a-ENSG00000013725	rs10897119	A	T	A	T	0.108461	-0.0391285	0.224462	0.286904	FALSE	TRUE	FALSE	KIRC	60838293	0.33675	0.0407331	outcome	TRUE	reported	380248	378749	1499	11	60605766	0.0142358	2.56035390600421e-14	31565	NA	NA	eqtl-a-ENSG00000013725	TRUE	reported	eqtl-a-ENSG00000013725	rs10897119	2.56035390600421e-14	2	1	TRUE	0.042845340649653	58.0474909739666	CD6	ENSG00000013725
260	eqtl-a-ENSG00000013725	rs10897123	T	C	T	C	0.117312	-0.0194557	0.256684	0.29879	FALSE	FALSE	FALSE	KIRC	60884486	0.628322	0.0401903	outcome	TRUE	reported	380248	378749	1499	11	60651959	0.0135899	6.01866262899572e-18	31557	NA	NA	eqtl-a-ENSG00000013725	TRUE	reported	eqtl-a-ENSG00000013725	rs10897123	6.01866262899572e-18	2	1	TRUE	0.0485377791679531	74.5164841647014	CD6	ENSG00000013725
261	eqtl-a-ENSG00000013725	rs10944479	A	G	A	G	-0.0775486	0.0295758	0.176852	0.121163	FALSE	FALSE	FALSE	KIRC	90170674	0.599135	0.0562657	outcome	TRUE	reported	380248	378749	1499	6	90880393	0.0155855	6.49785476343365e-07	28288	NA	NA	eqtl-a-ENSG00000013725	TRUE	reported	eqtl-a-ENSG00000013725	rs10944479	6.49785476343365e-07	2	1	TRUE	-0.0295718	24.7574804440031	CD6	ENSG00000013725
262	eqtl-a-ENSG00000013725	rs11154801	A	C	A	C	-0.0621982	0.0289582	0.362922	0.330743	FALSE	FALSE	FALSE	KIRC	135418217	0.460266	0.039217	outcome	TRUE	reported	380248	378749	1499	6	135739355	0.0123667	4.91496013906001e-07	31684	NA	NA	eqtl-a-ENSG00000013725	TRUE	reported	eqtl-a-ENSG00000013725	rs11154801	4.91496013906001e-07	2	1	TRUE	-0.0282452	25.2957745542824	CD6	ENSG00000013725
263	eqtl-a-ENSG00000013725	rs11230472	A	G	A	G	-0.106346	0.0262788	0.1956	0.162004	FALSE	FALSE	FALSE	KIRC	60772751	0.604141	0.0506868	outcome	TRUE	reported	380248	378749	1499	11	60540224	0.0149779	1.24566138011389e-12	28917	NA	NA	eqtl-a-ENSG00000013725	TRUE	reported	eqtl-a-ENSG00000013725	rs11230472	1.24566138011389e-12	2	1	TRUE	-0.0417187	50.4127589024745	CD6	ENSG00000013725
264	eqtl-a-ENSG00000013725	rs11230485	C	A	C	A	0.097836	-0.0352165	0.206714	0.271288	FALSE	FALSE	FALSE	KIRC	60803898	0.395638	0.0414587	outcome	TRUE	reported	380248	378749	1499	11	60571371	0.0146745	2.61095868658593e-11	28801	NA	NA	eqtl-a-ENSG00000013725	TRUE	reported	eqtl-a-ENSG00000013725	rs11230485	2.61095868658593e-11	2	1	TRUE	0.0392565178291628	44.4498962454077	CD6	ENSG00000013725
265	eqtl-a-ENSG00000013725	rs11230521	A	G	A	G	0.117579	-0.0222428	0.25603	0.296211	FALSE	FALSE	FALSE	KIRC	60931260	0.580885	0.0402882	outcome	TRUE	reported	380248	378749	1499	11	60698732	0.0136011	5.39013943632551e-18	31566	NA	NA	eqtl-a-ENSG00000013725	TRUE	reported	eqtl-a-ENSG00000013725	rs11230521	5.39013943632551e-18	2	1	TRUE	0.0486011099654648	74.7328349056709	CD6	ENSG00000013725
266	eqtl-a-ENSG00000013725	rs11230548	A	C	A	C	0.200173	-0.0093117	0.26933	0.390811	FALSE	FALSE	FALSE	KIRC	60984097	0.808356	0.0383912	outcome	TRUE	reported	380248	378749	1499	11	60751569	0.0133104	4.088838902677e-51	31355	NA	NA	eqtl-a-ENSG00000013725	TRUE	reported	eqtl-a-ENSG00000013725	rs11230548	4.088838902677e-51	2	1	TRUE	0.0846279961675851	226.16676292333	CD6	ENSG00000013725
267	eqtl-a-ENSG00000013725	rs11230563	T	C	T	C	-0.0651693	0.00631234	0.324294	0.248208	FALSE	FALSE	FALSE	KIRC	61008737	0.883066	0.0429169	outcome	TRUE	reported	380248	378749	1499	11	60776209	0.0127026	2.88821819766836e-07	31295	NA	NA	eqtl-a-ENSG00000013725	TRUE	reported	eqtl-a-ENSG00000013725	rs11230563	2.88821819766836e-07	2	1	TRUE	-0.0289897	26.3209080029521	CD6	ENSG00000013725
268	eqtl-a-ENSG00000013725	rs11230586	T	C	T	C	-0.125596	0.04162	0.0862941	0.0728265	FALSE	FALSE	FALSE	KIRC	61079353	0.562403	0.0718482	outcome	TRUE	reported	380248	378749	1499	11	60846825	0.0211695	2.97447278710362e-09	28802	NA	NA	eqtl-a-ENSG00000013725	TRUE	reported	eqtl-a-ENSG00000013725	rs11230586	2.97447278710362e-09	2	1	TRUE	-0.0349385	35.1990072719999	CD6	ENSG00000013725
269	eqtl-a-ENSG00000013725	rs113061811	T	C	T	C	-0.173849	0.317619	0.0259272	0.0169552	FALSE	FALSE	FALSE	KIRC	61452227	0.0303222	0.146648	outcome	TRUE	reported	380248	378749	1499	11	61219699	0.037423	3.39086109908256e-06	22142	NA	NA	eqtl-a-ENSG00000013725	TRUE	reported	eqtl-a-ENSG00000013725	rs113061811	3.39086109908256e-06	2	1	TRUE	-0.0312056	21.5807828404924	CD6	ENSG00000013725
270	eqtl-a-ENSG00000013725	rs1230666	G	A	G	A	-0.086701	0.0494849	0.862571	0.83519	FALSE	FALSE	FALSE	KIRC	113630788	0.320494	0.0498115	outcome	TRUE	reported	380248	378749	1499	1	114173410	0.0172711	5.16713728009e-07	30415	NA	NA	eqtl-a-ENSG00000013725	TRUE	reported	eqtl-a-ENSG00000013725	rs1230666	5.16713728009e-07	2	1	TRUE	-0.0287736	25.2004453428185	CD6	ENSG00000013725
271	eqtl-a-ENSG00000013725	rs185819	C	T	C	T	-0.055476	0.00684425	0.537372	0.523858	FALSE	FALSE	FALSE	KIRC	32082290	0.852944	0.0369233	outcome	TRUE	reported	380248	378749	1499	6	32050067	0.0119278	3.30651121439646e-06	30603	NA	NA	eqtl-a-ENSG00000013725	TRUE	reported	eqtl-a-ENSG00000013725	rs185819	3.30651121439646e-06	2	1	TRUE	-0.0265781	21.6316467442009	CD6	ENSG00000013725
272	eqtl-a-ENSG00000013725	rs2476601	G	A	G	A	-0.121054	0.0672526	0.899781	0.851565	FALSE	FALSE	FALSE	KIRC	113834946	0.194085	0.0517889	outcome	TRUE	reported	380248	378749	1499	1	114377568	0.0197937	9.60749130300686e-10	30165	NA	NA	eqtl-a-ENSG00000013725	TRUE	reported	eqtl-a-ENSG00000013725	rs2476601	9.60749130300686e-10	2	1	TRUE	-0.0351921	37.4028177901858	CD6	ENSG00000013725
273	eqtl-a-ENSG00000013725	rs2905501	C	T	C	T	-0.254365	0.0931378	0.915169	0.922595	FALSE	FALSE	FALSE	KIRC	61072106	0.1745	0.0685904	outcome	TRUE	reported	380248	378749	1499	11	60839578	0.0212532	5.21434785414456e-33	31233	NA	NA	eqtl-a-ENSG00000013725	TRUE	reported	eqtl-a-ENSG00000013725	rs2905501	5.21434785414456e-33	2	1	TRUE	-0.0675688	143.240572546104	CD6	ENSG00000013725
274	eqtl-a-ENSG00000013725	rs2905513	T	C	T	C	0.26112	0.00716864	0.321098	0.443961	FALSE	FALSE	FALSE	KIRC	60995378	0.848035	0.0374096	outcome	TRUE	reported	380248	378749	1499	11	60762850	0.0125565	4.74351196085702e-96	31556	NA	NA	eqtl-a-ENSG00000013725	TRUE	reported	eqtl-a-ENSG00000013725	rs2905513	4.74351196085702e-96	2	1	TRUE	0.116275567067947	432.457140338976	CD6	ENSG00000013725
275	eqtl-a-ENSG00000013725	rs3016171	A	G	A	G	0.276624	0.011152	0.331147	0.441251	FALSE	FALSE	FALSE	KIRC	61036116	0.764922	0.0372945	outcome	TRUE	reported	380248	378749	1499	11	60803588	0.0124303	1.03276140576139e-109	31684	NA	NA	eqtl-a-ENSG00000013725	TRUE	reported	eqtl-a-ENSG00000013725	rs3016171	1.03276140576139e-109	2	1	TRUE	0.12406059101861	495.240887666916	CD6	ENSG00000013725
276	eqtl-a-ENSG00000013725	rs3016368	C	T	C	T	-0.125559	0.00201496	0.653693	0.639827	FALSE	FALSE	FALSE	KIRC	60944127	0.958194	0.0384387	outcome	TRUE	reported	380248	378749	1499	11	60711599	0.0124644	7.2577165026743e-24	31231	NA	NA	eqtl-a-ENSG00000013725	TRUE	reported	eqtl-a-ENSG00000013725	rs3016368	7.2577165026743e-24	2	1	TRUE	-0.0569106	101.473570271988	CD6	ENSG00000013725
277	eqtl-a-ENSG00000013725	rs3019567	G	C	G	C	0.255416	-0.0951631	0.0864132	0.0763885	FALSE	TRUE	FALSE	KIRC	61090707	0.167148	0.0688875	outcome	TRUE	reported	380248	378749	1499	11	60858179	0.0210732	8.23569017153612e-34	31564	NA	NA	eqtl-a-ENSG00000013725	TRUE	reported	eqtl-a-ENSG00000013725	rs3019567	8.23569017153612e-34	2	1	TRUE	0.0680654924596087	146.904541009822	CD6	ENSG00000013725
278	eqtl-a-ENSG00000013725	rs3131018	C	A	C	A	-0.0666883	0.00791201	0.65387	0.636191	FALSE	FALSE	FALSE	KIRC	31175805	0.836342	0.038301	outcome	TRUE	reported	380248	378749	1499	6	31143582	0.012498	9.51239771679762e-08	30603	NA	NA	eqtl-a-ENSG00000013725	TRUE	reported	eqtl-a-ENSG00000013725	rs3131018	9.51239771679762e-08	2	1	TRUE	-0.0304887	28.4720182010367	CD6	ENSG00000013725
279	eqtl-a-ENSG00000013725	rs34383631	T	C	T	C	-0.362353	-0.00953183	0.366096	0.284944	FALSE	FALSE	FALSE	KIRC	61025858	0.814743	0.0406802	outcome	TRUE	reported	380248	378749	1499	11	60793330	0.0119724	1e-200	31355	NA	NA	eqtl-a-ENSG00000013725	TRUE	reported	eqtl-a-ENSG00000013725	rs34383631	1e-200	2	1	TRUE	-0.168484	916.012259361823	CD6	ENSG00000013725
280	eqtl-a-ENSG00000013725	rs3862662	T	A	T	A	0.12824	-0.0240667	0.26811	0.312149	FALSE	TRUE	FALSE	KIRC	60868357	0.54472	0.0397342	outcome	TRUE	reported	380248	378749	1499	11	60635830	0.0133924	1.01274474881453e-21	31566	NA	NA	eqtl-a-ENSG00000013725	TRUE	reported	eqtl-a-ENSG00000013725	rs3862662	1.01274474881453e-21	2	1	TRUE	0.0538194422967078	91.6917357798451	CD6	ENSG00000013725
281	eqtl-a-ENSG00000013725	rs429150	C	T	C	T	-0.0592426	0.0193176	0.521419	0.53621	FALSE	FALSE	FALSE	KIRC	32107786	0.601352	0.0369747	outcome	TRUE	reported	380248	378749	1499	6	32075563	0.011904	6.47112814415988e-07	30987	NA	NA	eqtl-a-ENSG00000013725	TRUE	reported	eqtl-a-ENSG00000013725	rs429150	6.47112814415988e-07	2	1	TRUE	-0.0282613	24.7675121200902	CD6	ENSG00000013725
282	eqtl-a-ENSG00000013725	rs495790	G	C	G	C	-0.151787	0.0235892	0.205373	0.175613	FALSE	TRUE	FALSE	KIRC	60911358	0.625305	0.0483043	outcome	TRUE	reported	380248	378749	1499	11	60678830	0.0146775	4.56877741185818e-25	31561	NA	NA	eqtl-a-ENSG00000013725	TRUE	reported	eqtl-a-ENSG00000013725	rs495790	4.56877741185818e-25	2	1	TRUE	-0.0581147	106.946106144423	CD6	ENSG00000013725
283	eqtl-a-ENSG00000013725	rs500595	T	C	T	C	0.105632	-0.043702	0.596548	0.622976	FALSE	FALSE	FALSE	KIRC	60849685	0.250493	0.0380297	outcome	TRUE	reported	380248	378749	1499	11	60617158	0.0120992	2.53337803038536e-18	31554	NA	NA	eqtl-a-ENSG00000013725	TRUE	reported	eqtl-a-ENSG00000013725	rs500595	2.53337803038536e-18	2	1	TRUE	0.049090952751832	76.2215355791752	CD6	ENSG00000013725
284	eqtl-a-ENSG00000013725	rs55753183	C	A	C	A	-0.156928	-0.00198183	0.3367	0.260351	FALSE	FALSE	FALSE	KIRC	61022171	0.96245	0.0420961	outcome	TRUE	reported	380248	378749	1499	11	60789643	0.0125247	5.14162028135438e-36	31563	NA	NA	eqtl-a-ENSG00000013725	TRUE	reported	eqtl-a-ENSG00000013725	rs55753183	5.14162028135438e-36	2	1	TRUE	-0.0703526	156.987912775076	CD6	ENSG00000013725
285	eqtl-a-ENSG00000013725	rs559282	C	A	C	A	-0.282561	0.00515803	0.0344702	0.0326841	FALSE	FALSE	FALSE	KIRC	60958414	0.960776	0.10488	outcome	TRUE	reported	380248	378749	1499	11	60725886	0.0325374	3.80715010380178e-18	31170	NA	NA	eqtl-a-ENSG00000013725	TRUE	reported	eqtl-a-ENSG00000013725	rs559282	3.80715010380178e-18	2	1	TRUE	-0.0491304	75.4151753297446	CD6	ENSG00000013725
286	eqtl-a-ENSG00000013725	rs55951851	G	A	G	A	-0.11215	0.0626229	0.0850009	0.0772649	FALSE	FALSE	FALSE	KIRC	61432915	0.364203	0.0690146	outcome	TRUE	reported	380248	378749	1499	11	61200387	0.0213205	1.43899736935702e-07	27063	NA	NA	eqtl-a-ENSG00000013725	TRUE	reported	eqtl-a-ENSG00000013725	rs55951851	1.43899736935702e-07	2	1	TRUE	-0.0319601	27.6696576072604	CD6	ENSG00000013725
287	eqtl-a-ENSG00000013725	rs6591624	G	C	G	C	0.0990058	-0.0532764	0.776995	0.778918	FALSE	TRUE	FALSE	KIRC	60785229	0.232417	0.0446143	outcome	TRUE	reported	380248	378749	1499	11	60552702	0.0142738	4.02253655998683e-12	28135	NA	NA	eqtl-a-ENSG00000013725	TRUE	reported	eqtl-a-ENSG00000013725	rs6591624	4.02253655998683e-12	2	1	TRUE	0.0413182554946047	48.1107425797434	CD6	ENSG00000013725
288	eqtl-a-ENSG00000013725	rs6679677	A	C	A	C	0.112764	-0.0650884	0.107034	0.146741	FALSE	FALSE	FALSE	KIRC	113761186	0.21148	0.0520914	outcome	TRUE	reported	380248	378749	1499	1	114303808	0.0192282	4.50754426214181e-09	29781	NA	NA	eqtl-a-ENSG00000013725	TRUE	reported	eqtl-a-ENSG00000013725	rs6679677	4.50754426214181e-09	2	1	TRUE	0.033964571771622	34.3924951188095	CD6	ENSG00000013725
289	eqtl-a-ENSG00000013725	rs688638	G	C	G	C	0.0949641	-0.0534765	0.637885	0.691028	FALSE	TRUE	FALSE	KIRC	60900032	0.178645	0.0397613	outcome	TRUE	reported	380248	378749	1499	11	60667504	0.0123579	1.53497038210314e-14	31568	NA	NA	eqtl-a-ENSG00000013725	TRUE	reported	eqtl-a-ENSG00000013725	rs688638	1.53497038210314e-14	2	1	TRUE	0.0432114819343785	59.051313220468	CD6	ENSG00000013725
290	eqtl-a-ENSG00000013725	rs7925800	G	A	G	A	0.0895786	-0.0014559	0.652336	0.674158	FALSE	FALSE	FALSE	KIRC	61123397	0.970428	0.0392732	outcome	TRUE	reported	380248	378749	1499	11	60890869	0.0124749	6.93106545149936e-13	31569	NA	NA	eqtl-a-ENSG00000013725	TRUE	reported	eqtl-a-ENSG00000013725	rs7925800	6.93106545149936e-13	2	1	TRUE	0.0403827729045052	51.5625510002554	CD6	ENSG00000013725
291	eqtl-a-ENSG00000013725	rs7930400	A	G	A	G	0.0967948	-0.0460576	0.587218	0.63069	FALSE	FALSE	FALSE	KIRC	60827532	0.22829	0.0382292	outcome	TRUE	reported	380248	378749	1499	11	60595005	0.0120614	1.01367795088865e-15	30729	NA	NA	eqtl-a-ENSG00000013725	TRUE	reported	eqtl-a-ENSG00000013725	rs7930400	1.01367795088865e-15	2	1	TRUE	0.045734039737043	64.4033729068386	CD6	ENSG00000013725
292	eqtl-a-ENSG00000013725	rs9275319	G	A	G	A	0.0949132	-0.0107913	0.128939	0.217844	FALSE	FALSE	FALSE	KIRC	32698518	0.810646	0.0450403	outcome	TRUE	reported	380248	378749	1499	6	32666295	0.0177414	8.81495297871165e-08	30211	NA	NA	eqtl-a-ENSG00000013725	TRUE	reported	eqtl-a-ENSG00000013725	rs9275319	8.81495297871165e-08	2	1	TRUE	0.0307655669048855	28.6205158054102	CD6	ENSG00000013725
293	eqtl-a-ENSG00000013725	rs9734510	A	G	A	G	-0.280981	0.0350557	0.334963	0.255833	FALSE	FALSE	FALSE	KIRC	61005880	0.407224	0.0422975	outcome	TRUE	reported	380248	378749	1499	11	60773352	0.0123865	6.3533093185174e-114	31560	NA	NA	eqtl-a-ENSG00000013725	TRUE	reported	eqtl-a-ENSG00000013725	rs9734510	6.3533093185174e-114	2	1	TRUE	-0.126666	514.584491843428	CD6	ENSG00000013725
294	eqtl-a-ENSG00000018280	rs10172987	G	A	G	A	0.179062	0.0889721	0.0863632	0.0504028	FALSE	FALSE	FALSE	KIRC	217910385	0.290077	0.0840985	outcome	TRUE	reported	380248	378749	1499	2	218775108	0.0211345	2.40380923874633e-17	28673	NA	NA	eqtl-a-ENSG00000018280	TRUE	reported	eqtl-a-ENSG00000018280	rs10172987	2.40380923874633e-17	2	1	TRUE	0.0499743372771796	71.7832151593129	SLC11A1	ENSG00000018280
295	eqtl-a-ENSG00000018280	rs10187424	C	T	C	T	0.107017	-0.0388674	0.420816	0.426433	FALSE	FALSE	FALSE	KIRC	85567174	0.298944	0.0374193	outcome	TRUE	reported	380248	378749	1499	2	85794297	0.0120219	5.50427343312578e-19	31684	NA	NA	eqtl-a-ENSG00000018280	TRUE	reported	eqtl-a-ENSG00000018280	rs10187424	5.50427343312578e-19	2	1	TRUE	0.0499494738472117	79.2427105191303	SLC11A1	ENSG00000018280
296	eqtl-a-ENSG00000018280	rs10189479	A	C	A	C	0.255101	0.0299367	0.409974	0.425882	FALSE	FALSE	FALSE	KIRC	218422553	0.423341	0.037391	outcome	TRUE	reported	380248	378749	1499	2	219287276	0.0119092	8.66961875758221e-102	31684	NA	NA	eqtl-a-ENSG00000018280	TRUE	reported	eqtl-a-ENSG00000018280	rs10189479	8.66961875758221e-102	2	1	TRUE	0.119481585245647	458.837753340168	SLC11A1	ENSG00000018280
297	eqtl-a-ENSG00000018280	rs10804264	C	T	C	T	0.230522	0.00862238	0.475008	0.411627	FALSE	FALSE	FALSE	KIRC	218091086	0.818328	0.0375383	outcome	TRUE	reported	380248	378749	1499	2	218955809	0.0117594	1.45211161758776e-85	31684	NA	NA	eqtl-a-ENSG00000018280	TRUE	reported	eqtl-a-ENSG00000018280	rs10804264	1.45211161758776e-85	2	1	TRUE	0.109471957897653	384.285883399594	SLC11A1	ENSG00000018280
298	eqtl-a-ENSG00000018280	rs10932744	T	C	T	C	0.233225	0.00687367	0.395053	0.33892	FALSE	FALSE	FALSE	KIRC	218074907	0.860415	0.0390891	outcome	TRUE	reported	380248	378749	1499	2	218939630	0.0120154	6.30376478829485e-84	31355	NA	NA	eqtl-a-ENSG00000018280	TRUE	reported	eqtl-a-ENSG00000018280	rs10932744	6.30376478829485e-84	2	1	TRUE	0.108969114490424	376.767763232407	SLC11A1	ENSG00000018280
299	eqtl-a-ENSG00000018280	rs10932781	T	G	T	G	-0.263777	-0.0260131	0.575266	0.569902	FALSE	FALSE	FALSE	KIRC	218433195	0.485508	0.0372962	outcome	TRUE	reported	380248	378749	1499	2	219297918	0.0118342	4.69894108605212e-110	31229	NA	NA	eqtl-a-ENSG00000018280	TRUE	reported	eqtl-a-ENSG00000018280	rs10932781	4.69894108605212e-110	2	1	TRUE	-0.125143	496.816533124781	SLC11A1	ENSG00000018280
300	eqtl-a-ENSG00000018280	rs112253950	A	G	A	G	-0.24668	-0.0664711	0.0319079	0.0311073	FALSE	FALSE	FALSE	KIRC	218944519	0.53866	0.108111	outcome	TRUE	reported	380248	378749	1499	2	219809241	0.0338002	2.9120578615297e-13	24929	NA	NA	eqtl-a-ENSG00000018280	TRUE	reported	eqtl-a-ENSG00000018280	rs112253950	2.9120578615297e-13	2	1	TRUE	-0.046176	53.2634556527687	SLC11A1	ENSG00000018280
301	eqtl-a-ENSG00000018280	rs112747731	T	C	T	C	-0.250562	0.176081	0.0282089	0.0208756	FALSE	FALSE	FALSE	KIRC	219024691	0.159872	0.12528	outcome	TRUE	reported	380248	378749	1499	2	219889413	0.0358853	2.90201731938023e-12	26983	NA	NA	eqtl-a-ENSG00000018280	TRUE	reported	eqtl-a-ENSG00000018280	rs112747731	2.90201731938023e-12	2	1	TRUE	-0.0424695	48.7525404562453	SLC11A1	ENSG00000018280
302	eqtl-a-ENSG00000018280	rs114150340	A	G	A	G	-0.227487	-0.066349	0.0201029	0.00954416	FALSE	FALSE	FALSE	KIRC	218864856	0.726231	0.189491	outcome	TRUE	reported	380248	378749	1499	2	219729579	0.0423625	7.86484195782313e-08	14601	NA	NA	eqtl-a-ENSG00000018280	TRUE	reported	eqtl-a-ENSG00000018280	rs114150340	7.86484195782313e-08	2	1	TRUE	-0.0444002	28.8369950723711	SLC11A1	ENSG00000018280
303	eqtl-a-ENSG00000018280	rs114631695	T	C	T	C	-0.283526	-0.170019	0.0164786	0.0186436	FALSE	FALSE	FALSE	KIRC	219048011	0.235285	0.143252	outcome	TRUE	reported	380248	378749	1499	2	219912733	0.0466902	1.25860658605516e-09	10658	NA	NA	eqtl-a-ENSG00000018280	TRUE	reported	eqtl-a-ENSG00000018280	rs114631695	1.25860658605516e-09	2	1	TRUE	-0.0587246	36.8751939515675	SLC11A1	ENSG00000018280
304	eqtl-a-ENSG00000018280	rs114698684	A	G	A	G	0.257525	0.00362801	0.0211247	0.0323686	FALSE	FALSE	FALSE	KIRC	218906817	0.972569	0.105507	outcome	TRUE	reported	380248	378749	1499	2	219771539	0.0413323	4.65253876110169e-10	25454	NA	NA	eqtl-a-ENSG00000018280	TRUE	reported	eqtl-a-ENSG00000018280	rs114698684	4.65253876110169e-10	2	1	TRUE	0.0390245511505363	38.8203678037659	SLC11A1	ENSG00000018280
305	eqtl-a-ENSG00000018280	rs114969635	T	C	T	C	-0.295702	-0.164492	0.0220648	0.0241497	FALSE	FALSE	FALSE	KIRC	219005148	0.193002	0.126363	outcome	TRUE	reported	380248	378749	1499	2	219869870	0.0404407	2.6320855443441e-13	10015	NA	NA	eqtl-a-ENSG00000018280	TRUE	reported	eqtl-a-ENSG00000018280	rs114969635	2.6320855443441e-13	2	1	TRUE	-0.0728781	53.4651999323237	SLC11A1	ENSG00000018280
306	eqtl-a-ENSG00000018280	rs116136249	A	G	A	G	-0.365262	-0.040908	0.0194889	0.00981582	FALSE	FALSE	FALSE	KIRC	218832645	0.83123	0.191944	outcome	TRUE	reported	380248	378749	1499	2	219697368	0.0429452	1.80967255478879e-17	11258	NA	NA	eqtl-a-ENSG00000018280	TRUE	reported	eqtl-a-ENSG00000018280	rs116136249	1.80967255478879e-17	2	1	TRUE	-0.079911	72.3402035233315	SLC11A1	ENSG00000018280
307	eqtl-a-ENSG00000018280	rs116819734	G	A	G	A	-0.123679	0.000848184	0.0526865	0.102297	FALSE	FALSE	FALSE	KIRC	217889057	0.989223	0.0627942	outcome	TRUE	reported	380248	378749	1499	2	218753780	0.0266205	3.38111544815563e-06	25213	NA	NA	eqtl-a-ENSG00000018280	TRUE	reported	eqtl-a-ENSG00000018280	rs116819734	3.38111544815563e-06	2	1	TRUE	-0.0292482	21.5853708015599	SLC11A1	ENSG00000018280
308	eqtl-a-ENSG00000018280	rs11690316	G	A	G	A	0.232283	0.0257172	0.514414	0.440113	FALSE	FALSE	FALSE	KIRC	218152739	0.488884	0.037159	outcome	TRUE	reported	380248	378749	1499	2	219017462	0.0117469	4.98654795555798e-87	31681	NA	NA	eqtl-a-ENSG00000018280	TRUE	reported	eqtl-a-ENSG00000018280	rs11690316	4.98654795555798e-87	2	1	TRUE	0.110419202052851	391.010400645194	SLC11A1	ENSG00000018280
309	eqtl-a-ENSG00000018280	rs11695527	T	C	T	C	0.256268	0.0446077	0.388834	0.33934	FALSE	FALSE	FALSE	KIRC	218203380	0.252975	0.0390217	outcome	TRUE	reported	380248	378749	1499	2	219068103	0.012017	6.59173895244325e-101	31567	NA	NA	eqtl-a-ENSG00000018280	TRUE	reported	eqtl-a-ENSG00000018280	rs11695527	6.59173895244325e-101	2	1	TRUE	0.119176102985246	454.775056742068	SLC11A1	ENSG00000018280
310	eqtl-a-ENSG00000018280	rs11967684	A	G	A	G	-0.0569235	-0.015817	0.363875	0.467609	FALSE	FALSE	FALSE	KIRC	31231989	0.66978	0.03709	outcome	TRUE	reported	380248	378749	1499	6	31199766	0.0123615	4.12467752254343e-06	30603	NA	NA	eqtl-a-ENSG00000018280	TRUE	reported	eqtl-a-ENSG00000018280	rs11967684	4.12467752254343e-06	2	1	TRUE	-0.0263149	21.2051253553737	SLC11A1	ENSG00000018280
311	eqtl-a-ENSG00000018280	rs12468509	C	T	C	T	0.536861	0.00632546	0.2455	0.202271	FALSE	FALSE	FALSE	KIRC	218350485	0.890265	0.0458472	outcome	TRUE	reported	380248	378749	1499	2	219215208	0.0130698	1e-200	31684	NA	NA	eqtl-a-ENSG00000018280	TRUE	reported	eqtl-a-ENSG00000018280	rs12468509	1e-200	2	1	TRUE	0.224863791789769	1687.27483128237	SLC11A1	ENSG00000018280
312	eqtl-a-ENSG00000018280	rs12612675	G	A	G	A	0.233945	0.0429236	0.375902	0.309596	FALSE	FALSE	FALSE	KIRC	218268414	0.28025	0.039753	outcome	TRUE	reported	380248	378749	1499	2	219133137	0.0121292	6.80142635603855e-83	31558	NA	NA	eqtl-a-ENSG00000018280	TRUE	reported	eqtl-a-ENSG00000018280	rs12612675	6.80142635603855e-83	2	1	TRUE	0.10794328604296	372.017372257195	SLC11A1	ENSG00000018280
313	eqtl-a-ENSG00000018280	rs12618008	C	T	C	T	0.0616252	0.0192323	0.607885	0.533099	FALSE	FALSE	FALSE	KIRC	217793329	0.605119	0.0371961	outcome	TRUE	reported	380248	378749	1499	2	218658052	0.0121796	4.19700996150006e-07	31682	NA	NA	eqtl-a-ENSG00000018280	TRUE	reported	eqtl-a-ENSG00000018280	rs12618008	4.19700996150006e-07	2	1	TRUE	0.028415632265878	25.6006287965068	SLC11A1	ENSG00000018280
314	eqtl-a-ENSG00000018280	rs12694442	C	T	C	T	0.198145	-0.0431942	0.492997	0.557146	FALSE	FALSE	FALSE	KIRC	218798876	0.24672	0.0372893	outcome	TRUE	reported	380248	378749	1499	2	219663599	0.0117873	2.05494404134532e-63	31565	NA	NA	eqtl-a-ENSG00000018280	TRUE	reported	eqtl-a-ENSG00000018280	rs12694442	2.05494404134532e-63	2	1	TRUE	0.0941985497186623	282.577489033971	SLC11A1	ENSG00000018280
315	eqtl-a-ENSG00000018280	rs12989035	C	T	C	T	0.226387	0.0137293	0.411684	0.332968	FALSE	FALSE	FALSE	KIRC	218052281	0.724843	0.0390043	outcome	TRUE	reported	380248	378749	1499	2	218917004	0.0119426	3.92464157353462e-80	31684	NA	NA	eqtl-a-ENSG00000018280	TRUE	reported	eqtl-a-ENSG00000018280	rs12989035	3.92464157353462e-80	2	1	TRUE	0.105900318133573	359.339695804753	SLC11A1	ENSG00000018280
316	eqtl-a-ENSG00000018280	rs12998693	C	T	C	T	-0.174187	-0.0134519	0.0574151	0.0909533	FALSE	FALSE	FALSE	KIRC	217946246	0.840871	0.0669985	outcome	TRUE	reported	380248	378749	1499	2	218810969	0.0255421	9.11590939536166e-12	26376	NA	NA	eqtl-a-ENSG00000018280	TRUE	reported	eqtl-a-ENSG00000018280	rs12998693	9.11590939536166e-12	2	1	TRUE	-0.0419555	46.5069948035289	SLC11A1	ENSG00000018280
317	eqtl-a-ENSG00000018280	rs13029731	T	C	T	C	0.0980015	-0.0102563	0.128843	0.153726	FALSE	FALSE	FALSE	KIRC	219170383	0.840572	0.0509849	outcome	TRUE	reported	380248	378749	1499	2	220035105	0.0177459	3.34402873003766e-08	31681	NA	NA	eqtl-a-ENSG00000018280	TRUE	reported	eqtl-a-ENSG00000018280	rs13029731	3.34402873003766e-08	2	1	TRUE	0.031012730897659	30.4978613872037	SLC11A1	ENSG00000018280
318	eqtl-a-ENSG00000018280	rs13277976	T	A	T	A	-0.10822	-0.124992	0.785822	0.832628	FALSE	TRUE	FALSE	KIRC	60766479	0.0085489	0.047533	outcome	TRUE	reported	380248	378749	1499	8	61679038	0.014479	7.76783514384352e-14	31569	NA	NA	eqtl-a-ENSG00000018280	TRUE	reported	eqtl-a-ENSG00000018280	rs13277976	7.76783514384352e-14	2	1	TRUE	-0.0420309	55.8647581515145	SLC11A1	ENSG00000018280
319	eqtl-a-ENSG00000018280	rs1344645	T	G	T	G	0.235539	0.027687	0.413282	0.427758	FALSE	FALSE	FALSE	KIRC	218673296	0.458186	0.0373222	outcome	TRUE	reported	380248	378749	1499	2	219538019	0.011923	7.266077069394e-87	31569	NA	NA	eqtl-a-ENSG00000018280	TRUE	reported	eqtl-a-ENSG00000018280	rs1344645	7.266077069394e-87	2	1	TRUE	0.110507692794989	390.260472358176	SLC11A1	ENSG00000018280
320	eqtl-a-ENSG00000018280	rs139499675	T	C	T	C	-0.346651	0.105855	0.0171397	0.00633013	FALSE	FALSE	FALSE	KIRC	218111418	0.648612	0.232296	outcome	TRUE	reported	380248	378749	1499	2	218976141	0.0457631	3.59169954787145e-14	9655	NA	NA	eqtl-a-ENSG00000018280	TRUE	reported	eqtl-a-ENSG00000018280	rs139499675	3.59169954787145e-14	2	1	TRUE	-0.0768704	57.3791410656525	SLC11A1	ENSG00000018280
321	eqtl-a-ENSG00000018280	rs142713239	T	C	T	C	-0.789839	0.0385738	0.0978519	0.111698	FALSE	FALSE	FALSE	KIRC	218361234	0.515649	0.0593383	outcome	TRUE	reported	380248	378749	1499	2	219225957	0.0188965	1e-200	31564	NA	NA	eqtl-a-ENSG00000018280	TRUE	reported	eqtl-a-ENSG00000018280	rs142713239	1e-200	2	1	TRUE	-0.229021	1747.08648711244	SLC11A1	ENSG00000018280
322	eqtl-a-ENSG00000018280	rs142991399	G	A	G	A	-0.218904	-0.054373	0.0292454	0.0561446	FALSE	FALSE	FALSE	KIRC	217999349	0.516107	0.0837334	outcome	TRUE	reported	380248	378749	1499	2	218864072	0.0352752	5.44891458335235e-10	12549	NA	NA	eqtl-a-ENSG00000018280	TRUE	reported	eqtl-a-ENSG00000018280	rs142991399	5.44891458335235e-10	2	1	TRUE	-0.0553158	38.5095483706141	SLC11A1	ENSG00000018280
323	eqtl-a-ENSG00000018280	rs146359078	A	G	A	G	-0.262577	-0.0943732	0.0115816	0.0146472	FALSE	FALSE	FALSE	KIRC	217935210	0.54708	0.156729	outcome	TRUE	reported	380248	378749	1499	2	218799933	0.0555835	2.31020223672481e-06	7037	NA	NA	eqtl-a-ENSG00000018280	TRUE	reported	eqtl-a-ENSG00000018280	rs146359078	2.31020223672481e-06	2	1	TRUE	-0.056233	22.3162688083579	SLC11A1	ENSG00000018280
324	eqtl-a-ENSG00000018280	rs147308271	A	G	A	G	0.266822	-0.194578	0.0132302	0.0147067	FALSE	FALSE	FALSE	KIRC	218902771	0.212248	0.155986	outcome	TRUE	reported	380248	378749	1499	2	219767493	0.0520415	2.94401487501562e-07	2003	NA	NA	eqtl-a-ENSG00000018280	TRUE	reported	eqtl-a-ENSG00000018280	rs147308271	2.94401487501562e-07	2	1	TRUE	0.113871277919506	26.2871594049364	SLC11A1	ENSG00000018280
325	eqtl-a-ENSG00000018280	rs147479277	G	A	G	A	0.270381	0.222346	0.0123796	0.0161486	FALSE	FALSE	FALSE	KIRC	218168971	0.143638	0.152044	outcome	TRUE	reported	380248	378749	1499	2	219033694	0.0537783	4.96660932954342e-07	10164	NA	NA	eqtl-a-ENSG00000018280	TRUE	reported	eqtl-a-ENSG00000018280	rs147479277	4.96660932954342e-07	2	1	TRUE	0.0498126936570342	25.2777375772135	SLC11A1	ENSG00000018280
326	eqtl-a-ENSG00000018280	rs148635664	T	C	T	C	0.0954709	0.0105903	0.140409	0.189783	FALSE	FALSE	FALSE	KIRC	219197951	0.823382	0.0474482	outcome	TRUE	reported	380248	378749	1499	2	220062673	0.0171129	2.42180962009796e-08	27310	NA	NA	eqtl-a-ENSG00000018280	TRUE	reported	eqtl-a-ENSG00000018280	rs148635664	2.42180962009796e-08	2	1	TRUE	0.0337407791395648	31.1239571152566	SLC11A1	ENSG00000018280
327	eqtl-a-ENSG00000018280	rs149007767	T	C	T	C	-0.122404	-0.012157	0.149708	0.206172	FALSE	FALSE	FALSE	KIRC	50330658	0.791473	0.0459796	outcome	TRUE	reported	380248	378749	1499	7	50370254	0.0166498	1.95568993202892e-13	30077	NA	NA	eqtl-a-ENSG00000018280	TRUE	reported	eqtl-a-ENSG00000018280	rs149007767	1.95568993202892e-13	2	1	TRUE	-0.0423539	54.0471973529294	SLC11A1	ENSG00000018280
328	eqtl-a-ENSG00000018280	rs149110519	T	C	T	C	0.429892	0.0939635	0.0526158	0.0257763	FALSE	FALSE	FALSE	KIRC	144064640	0.416783	0.115716	outcome	TRUE	reported	380248	378749	1499	6	144385777	0.026411	1.43747400587437e-59	25735	NA	NA	eqtl-a-ENSG00000018280	TRUE	reported	eqtl-a-ENSG00000018280	rs149110519	1.43747400587437e-59	2	1	TRUE	0.100949702131416	264.940917586683	SLC11A1	ENSG00000018280
329	eqtl-a-ENSG00000018280	rs17572109	A	G	A	G	0.49284	0.0258184	0.195642	0.159634	FALSE	FALSE	FALSE	KIRC	218229211	0.606967	0.0501906	outcome	TRUE	reported	380248	378749	1499	2	219093934	0.0144185	1e-200	28802	NA	NA	eqtl-a-ENSG00000018280	TRUE	reported	eqtl-a-ENSG00000018280	rs17572109	1e-200	2	1	TRUE	0.197448789245761	1168.34669470681	SLC11A1	ENSG00000018280
330	eqtl-a-ENSG00000018280	rs17838611	T	C	T	C	-0.262996	-0.0531289	0.0266212	0.02636	FALSE	FALSE	FALSE	KIRC	218167634	0.651856	0.117754	outcome	TRUE	reported	380248	378749	1499	2	219032357	0.0369071	1.03323711949363e-12	26186	NA	NA	eqtl-a-ENSG00000018280	TRUE	reported	eqtl-a-ENSG00000018280	rs17838611	1.03323711949363e-12	2	1	TRUE	-0.0439947	50.7783334619288	SLC11A1	ENSG00000018280
331	eqtl-a-ENSG00000018280	rs182502950	C	A	C	A	0.258474	-0.19472	0.0132302	0.0146996	FALSE	FALSE	FALSE	KIRC	218938559	0.211929	0.155991	outcome	TRUE	reported	380248	378749	1499	2	219803281	0.0520445	6.82071652116537e-07	2003	NA	NA	eqtl-a-ENSG00000018280	TRUE	reported	eqtl-a-ENSG00000018280	rs182502950	6.82071652116537e-07	2	1	TRUE	0.110346406143828	24.665166214336	SLC11A1	ENSG00000018280
332	eqtl-a-ENSG00000018280	rs183140464	C	A	C	A	0.239833	0.0431223	0.0131004	0.0100418	FALSE	FALSE	FALSE	KIRC	218391680	0.819623	0.189108	outcome	TRUE	reported	380248	378749	1499	2	219256403	0.0523049	4.53555042841769e-06	1603	NA	NA	eqtl-a-ENSG00000018280	TRUE	reported	eqtl-a-ENSG00000018280	rs183140464	4.53555042841769e-06	2	1	TRUE	0.113851251954289	21.0248607285061	SLC11A1	ENSG00000018280
333	eqtl-a-ENSG00000018280	rs1863704	A	G	A	G	0.192827	0.0305073	0.370257	0.39298	FALSE	FALSE	FALSE	KIRC	218697952	0.421136	0.0379231	outcome	TRUE	reported	380248	378749	1499	2	219562675	0.0122184	4.1648560934074e-56	31300	NA	NA	eqtl-a-ENSG00000018280	TRUE	reported	eqtl-a-ENSG00000018280	rs1863704	4.1648560934074e-56	2	1	TRUE	0.0888533994080849	249.06173642484	SLC11A1	ENSG00000018280
334	eqtl-a-ENSG00000018280	rs1991162	C	T	C	T	0.0759231	-0.0345593	0.534117	0.504524	FALSE	FALSE	FALSE	KIRC	217873355	0.348848	0.0368898	outcome	TRUE	reported	380248	378749	1499	2	218738078	0.0119142	1.85848902164081e-10	31176	NA	NA	eqtl-a-ENSG00000018280	TRUE	reported	eqtl-a-ENSG00000018280	rs1991162	1.85848902164081e-10	2	1	TRUE	0.03606866758264	40.6086070225347	SLC11A1	ENSG00000018280
335	eqtl-a-ENSG00000018280	rs2081777	T	G	T	G	-0.0735255	-0.0105765	0.314303	0.389433	FALSE	FALSE	FALSE	KIRC	217982098	0.781209	0.0380801	outcome	TRUE	reported	380248	378749	1499	2	218846821	0.0128055	9.36742015522847e-09	30902	NA	NA	eqtl-a-ENSG00000018280	TRUE	reported	eqtl-a-ENSG00000018280	rs2081777	9.36742015522847e-09	2	1	TRUE	-0.0326461	32.9672629538964	SLC11A1	ENSG00000018280
336	eqtl-a-ENSG00000018280	rs2272189	A	G	A	G	0.202249	-0.0106654	0.46131	0.509973	FALSE	FALSE	FALSE	KIRC	218745599	0.772921	0.0369611	outcome	TRUE	reported	380248	378749	1499	2	219610322	0.0118173	1.15504791368286e-65	31684	NA	NA	eqtl-a-ENSG00000018280	TRUE	reported	eqtl-a-ENSG00000018280	rs2272189	1.15504791368286e-65	2	1	TRUE	0.0957113511852217	292.911379471006	SLC11A1	ENSG00000018280
337	eqtl-a-ENSG00000018280	rs2276631	T	C	T	C	0.503493	0.0110637	0.251298	0.248521	FALSE	FALSE	FALSE	KIRC	218384290	0.796565	0.0429166	outcome	TRUE	reported	380248	378749	1499	2	219249013	0.0130504	1e-200	31261	NA	NA	eqtl-a-ENSG00000018280	TRUE	reported	eqtl-a-ENSG00000018280	rs2276631	1e-200	2	1	TRUE	0.21319683683029	1488.46705840933	SLC11A1	ENSG00000018280
338	eqtl-a-ENSG00000018280	rs2279015	A	G	A	G	0.589202	0.0250683	0.370946	0.326947	FALSE	FALSE	FALSE	KIRC	218394547	0.52503	0.0394397	outcome	TRUE	reported	380248	378749	1499	2	219259270	0.0112788	1e-200	31684	NA	NA	eqtl-a-ENSG00000018280	TRUE	reported	eqtl-a-ENSG00000018280	rs2279015	1e-200	2	1	TRUE	0.281613004255504	2728.9943303968	SLC11A1	ENSG00000018280
339	eqtl-a-ENSG00000018280	rs2292552	C	T	C	T	0.247918	0.0399126	0.38052	0.309477	FALSE	FALSE	FALSE	KIRC	218278604	0.31535	0.0397512	outcome	TRUE	reported	380248	378749	1499	2	219143327	0.0120797	1.33076080170144e-93	26494	NA	NA	eqtl-a-ENSG00000018280	TRUE	reported	eqtl-a-ENSG00000018280	rs2292552	1.33076080170144e-93	2	1	TRUE	0.125103402233872	421.214993670541	SLC11A1	ENSG00000018280
340	eqtl-a-ENSG00000018280	rs2384950	C	T	C	T	-0.247841	-0.0259994	0.59348	0.572236	FALSE	FALSE	FALSE	KIRC	218634996	0.485816	0.0373031	outcome	TRUE	reported	380248	378749	1499	2	219499719	0.0119362	9.20025786648246e-96	28802	NA	NA	eqtl-a-ENSG00000018280	TRUE	reported	eqtl-a-ENSG00000018280	rs2384950	9.20025786648246e-96	2	1	TRUE	-0.121446	431.135844257929	SLC11A1	ENSG00000018280
341	eqtl-a-ENSG00000018280	rs28729183	T	C	T	C	-0.245543	-0.0275711	0.583698	0.571587	FALSE	FALSE	FALSE	KIRC	218444510	0.459792	0.037299	outcome	TRUE	reported	380248	378749	1499	2	219309233	0.0118957	1.17111623075445e-94	31563	NA	NA	eqtl-a-ENSG00000018280	TRUE	reported	eqtl-a-ENSG00000018280	rs28729183	1.17111623075445e-94	2	1	TRUE	-0.115412	426.064263737184	SLC11A1	ENSG00000018280
342	eqtl-a-ENSG00000018280	rs3181211	G	T	G	T	-0.133506	-0.0285976	0.318821	0.382637	FALSE	FALSE	FALSE	KIRC	218063921	0.451432	0.0379766	outcome	TRUE	reported	380248	378749	1499	2	218928644	0.0127219	9.16642522419557e-26	31684	NA	NA	eqtl-a-ENSG00000018280	TRUE	reported	eqtl-a-ENSG00000018280	rs3181211	9.16642522419557e-26	2	1	TRUE	-0.0588558	110.127964758202	SLC11A1	ENSG00000018280
343	eqtl-a-ENSG00000018280	rs3210652	A	G	A	G	0.0886189	0.0304111	0.135195	0.190956	FALSE	FALSE	FALSE	KIRC	219182118	0.516766	0.0469062	outcome	TRUE	reported	380248	378749	1499	2	220046840	0.0173902	3.47272185324518e-07	31300	NA	NA	eqtl-a-ENSG00000018280	TRUE	reported	eqtl-a-ENSG00000018280	rs3210652	3.47272185324518e-07	2	1	TRUE	0.0287927661716685	25.9683021964438	SLC11A1	ENSG00000018280
344	eqtl-a-ENSG00000018280	rs35271699	A	G	A	G	-0.246229	-0.0526547	0.519782	0.599496	FALSE	FALSE	FALSE	KIRC	218252759	0.161848	0.0376405	outcome	TRUE	reported	380248	378749	1499	2	219117482	0.0117312	8.23189836921386e-98	31564	NA	NA	eqtl-a-ENSG00000018280	TRUE	reported	eqtl-a-ENSG00000018280	rs35271699	8.23189836921386e-98	2	1	TRUE	-0.117329	440.548294941173	SLC11A1	ENSG00000018280
345	eqtl-a-ENSG00000018280	rs35422637	T	C	T	C	0.200766	-0.0107626	0.465447	0.510026	FALSE	FALSE	FALSE	KIRC	218778594	0.77106	0.0369863	outcome	TRUE	reported	380248	378749	1499	2	219643317	0.0118118	8.6437062642621e-65	31556	NA	NA	eqtl-a-ENSG00000018280	TRUE	reported	eqtl-a-ENSG00000018280	rs35422637	8.6437062642621e-65	2	1	TRUE	0.0952506114447538	288.900413260713	SLC11A1	ENSG00000018280
346	eqtl-a-ENSG00000018280	rs3731827	C	T	C	T	0.105803	-0.0364583	0.418566	0.426071	FALSE	FALSE	FALSE	KIRC	85578945	0.329878	0.0374177	outcome	TRUE	reported	380248	378749	1499	2	85806068	0.0120317	1.44843829990071e-18	31569	NA	NA	eqtl-a-ENSG00000018280	TRUE	reported	eqtl-a-ENSG00000018280	rs3731827	1.44843829990071e-18	2	1	TRUE	0.0494336914399579	77.328925385437	SLC11A1	ENSG00000018280
347	eqtl-a-ENSG00000018280	rs3770211	T	G	T	G	0.333508	-0.000868906	0.361946	0.398508	FALSE	FALSE	FALSE	KIRC	218405006	0.981799	0.0380872	outcome	TRUE	reported	380248	378749	1499	2	219269729	0.0120626	2.95120922666638e-168	24245	NA	NA	eqtl-a-ENSG00000018280	TRUE	reported	eqtl-a-ENSG00000018280	rs3770211	2.95120922666638e-168	2	1	TRUE	0.174836017894391	764.417566273945	SLC11A1	ENSG00000018280
348	eqtl-a-ENSG00000018280	rs3774937	C	T	C	T	-0.0695526	-0.0439376	0.320593	0.349044	FALSE	FALSE	FALSE	KIRC	102513096	0.256622	0.0387317	outcome	TRUE	reported	380248	378749	1499	4	103434253	0.0127393	4.76672392980034e-08	31569	NA	NA	eqtl-a-ENSG00000018280	TRUE	reported	eqtl-a-ENSG00000018280	rs3774937	4.76672392980034e-08	2	1	TRUE	-0.0307147	29.8081901958646	SLC11A1	ENSG00000018280
349	eqtl-a-ENSG00000018280	rs3903289	T	C	T	C	0.108398	-0.0635658	0.10848	0.0886535	FALSE	FALSE	FALSE	KIRC	219061090	0.324813	0.064559	outcome	TRUE	reported	380248	378749	1499	2	219925812	0.0191166	1.42459035603219e-08	30817	NA	NA	eqtl-a-ENSG00000018280	TRUE	reported	eqtl-a-ENSG00000018280	rs3903289	1.42459035603219e-08	2	1	TRUE	0.0322851696394342	32.1529801708802	SLC11A1	ENSG00000018280
350	eqtl-a-ENSG00000018280	rs3953456	A	G	A	G	0.237557	0.0374082	0.289995	0.246755	FALSE	FALSE	FALSE	KIRC	218015746	0.380966	0.0426976	outcome	TRUE	reported	380248	378749	1499	2	218880469	0.0129632	5.18919510806738e-75	28703	NA	NA	eqtl-a-ENSG00000018280	TRUE	reported	eqtl-a-ENSG00000018280	rs3953456	5.18919510806738e-75	2	1	TRUE	0.10754273012544	335.823606449051	SLC11A1	ENSG00000018280
351	eqtl-a-ENSG00000018280	rs454712	C	T	C	T	-0.153388	0.0620461	0.0570992	0.0638164	FALSE	FALSE	FALSE	KIRC	218966883	0.41327	0.0758369	outcome	TRUE	reported	380248	378749	1499	2	219831605	0.025618	2.12960962021551e-09	31240	NA	NA	eqtl-a-ENSG00000018280	TRUE	reported	eqtl-a-ENSG00000018280	rs454712	2.12960962021551e-09	2	1	TRUE	-0.0338575	35.8502614251494	SLC11A1	ENSG00000018280
352	eqtl-a-ENSG00000018280	rs4648045	C	T	C	T	-0.0634057	-0.0552512	0.352599	0.373291	FALSE	FALSE	FALSE	KIRC	102587546	0.147241	0.0381215	outcome	TRUE	reported	380248	378749	1499	4	103508703	0.0124457	3.49108159947994e-07	31569	NA	NA	eqtl-a-ENSG00000018280	TRUE	reported	eqtl-a-ENSG00000018280	rs4648045	3.49108159947994e-07	2	1	TRUE	-0.0286625	25.9548155331985	SLC11A1	ENSG00000018280
353	eqtl-a-ENSG00000018280	rs4672873	G	A	G	A	0.232482	0.0148248	0.472696	0.408943	FALSE	FALSE	FALSE	KIRC	218140487	0.692437	0.0374788	outcome	TRUE	reported	380248	378749	1499	2	219005210	0.0117596	5.44001378246734e-87	31683	NA	NA	eqtl-a-ENSG00000018280	TRUE	reported	eqtl-a-ENSG00000018280	rs4672873	5.44001378246734e-87	2	1	TRUE	0.110391307782808	390.835106597289	SLC11A1	ENSG00000018280
354	eqtl-a-ENSG00000018280	rs4674237	T	C	T	C	0.284157	-0.00202677	0.251855	0.19565	FALSE	FALSE	FALSE	KIRC	218027165	0.965308	0.0465993	outcome	TRUE	reported	380248	378749	1499	2	218891888	0.013501	2.43612741980601e-98	27310	NA	NA	eqtl-a-ENSG00000018280	TRUE	reported	eqtl-a-ENSG00000018280	rs4674237	2.43612741980601e-98	2	1	TRUE	0.126343601853112	442.98073923764	SLC11A1	ENSG00000018280
355	eqtl-a-ENSG00000018280	rs4674319	T	C	T	C	-0.248975	-0.0224428	0.579272	0.567923	FALSE	FALSE	FALSE	KIRC	218645597	0.546702	0.0372365	outcome	TRUE	reported	380248	378749	1499	2	219510320	0.0118724	1.21199268877492e-97	31566	NA	NA	eqtl-a-ENSG00000018280	TRUE	reported	eqtl-a-ENSG00000018280	rs4674319	1.21199268877492e-97	2	1	TRUE	-0.117224	439.778953590983	SLC11A1	ENSG00000018280
356	eqtl-a-ENSG00000018280	rs4674324	G	T	G	T	-0.236417	-0.0256331	0.585497	0.572143	FALSE	FALSE	FALSE	KIRC	218658710	0.49193	0.0372984	outcome	TRUE	reported	380248	378749	1499	2	219523433	0.0119164	1.36081785836244e-87	31684	NA	NA	eqtl-a-ENSG00000018280	TRUE	reported	eqtl-a-ENSG00000018280	rs4674324	1.36081785836244e-87	2	1	TRUE	-0.110776	393.611028646821	SLC11A1	ENSG00000018280
357	eqtl-a-ENSG00000018280	rs495855	G	A	G	A	-0.244299	-0.027265	0.585967	0.571877	FALSE	FALSE	FALSE	KIRC	218493135	0.464821	0.0373017	outcome	TRUE	reported	380248	378749	1499	2	219357858	0.0119072	1.52405275379732e-93	31684	NA	NA	eqtl-a-ENSG00000018280	TRUE	reported	eqtl-a-ENSG00000018280	rs495855	1.52405275379732e-93	2	1	TRUE	-0.114509	420.943765663379	SLC11A1	ENSG00000018280
358	eqtl-a-ENSG00000018280	rs497983	G	A	G	A	-0.238878	-0.0270448	0.584899	0.57185	FALSE	FALSE	FALSE	KIRC	218550466	0.468468	0.0373044	outcome	TRUE	reported	380248	378749	1499	2	219415189	0.0119104	1.78196840681642e-89	31683	NA	NA	eqtl-a-ENSG00000018280	TRUE	reported	eqtl-a-ENSG00000018280	rs497983	1.78196840681642e-89	2	1	TRUE	-0.111972	402.25329877671	SLC11A1	ENSG00000018280
359	eqtl-a-ENSG00000018280	rs4996257	T	C	T	C	-0.231637	-0.0397148	0.610846	0.690488	FALSE	FALSE	FALSE	KIRC	218298113	0.318046	0.0397752	outcome	TRUE	reported	380248	378749	1499	2	219162836	0.0120505	2.42270201210922e-82	31684	NA	NA	eqtl-a-ENSG00000018280	TRUE	reported	eqtl-a-ENSG00000018280	rs4996257	2.42270201210922e-82	2	1	TRUE	-0.107369	369.492586497888	SLC11A1	ENSG00000018280
360	eqtl-a-ENSG00000018280	rs500422	A	C	A	C	-0.251359	-0.0252914	0.579597	0.567693	FALSE	FALSE	FALSE	KIRC	218568272	0.497011	0.037237	outcome	TRUE	reported	380248	378749	1499	2	219432995	0.0118702	1.60324539069004e-99	31684	NA	NA	eqtl-a-ENSG00000018280	TRUE	reported	eqtl-a-ENSG00000018280	rs500422	1.60324539069004e-99	2	1	TRUE	-0.118135	448.407437101543	SLC11A1	ENSG00000018280
361	eqtl-a-ENSG00000018280	rs526134	A	G	A	G	-0.235643	-0.0279944	0.591946	0.571753	FALSE	FALSE	FALSE	KIRC	218537648	0.452959	0.0373014	outcome	TRUE	reported	380248	378749	1499	2	219402371	0.0119465	1.32068729514643e-86	31683	NA	NA	eqtl-a-ENSG00000018280	TRUE	reported	eqtl-a-ENSG00000018280	rs526134	1.32068729514643e-86	2	1	TRUE	-0.110145	389.069969964674	SLC11A1	ENSG00000018280
362	eqtl-a-ENSG00000018280	rs529474	T	C	T	C	-0.235602	-0.0281784	0.583563	0.571921	FALSE	FALSE	FALSE	KIRC	218598560	0.44999	0.0373011	outcome	TRUE	reported	380248	378749	1499	2	219463283	0.0119093	4.18793565117918e-87	31564	NA	NA	eqtl-a-ENSG00000018280	TRUE	reported	eqtl-a-ENSG00000018280	rs529474	4.18793565117918e-87	2	1	TRUE	-0.110671	391.368145817201	SLC11A1	ENSG00000018280
363	eqtl-a-ENSG00000018280	rs545460	G	A	G	A	-0.241133	-0.0278142	0.58434	0.571666	FALSE	FALSE	FALSE	KIRC	218527436	0.455822	0.0372972	outcome	TRUE	reported	380248	378749	1499	2	219392159	0.0119048	3.20922376804843e-91	31569	NA	NA	eqtl-a-ENSG00000018280	TRUE	reported	eqtl-a-ENSG00000018280	rs545460	3.20922376804843e-91	2	1	TRUE	-0.11327	410.269367021434	SLC11A1	ENSG00000018280
364	eqtl-a-ENSG00000018280	rs548521	T	C	T	C	-0.246297	-0.0278526	0.603029	0.571663	FALSE	FALSE	FALSE	KIRC	218463958	0.455205	0.0372977	outcome	TRUE	reported	380248	378749	1499	2	219328681	0.0119866	8.08723382528834e-94	31553	NA	NA	eqtl-a-ENSG00000018280	TRUE	reported	eqtl-a-ENSG00000018280	rs548521	8.08723382528834e-94	2	1	TRUE	-0.114913	422.207766771995	SLC11A1	ENSG00000018280
365	eqtl-a-ENSG00000018280	rs55838820	A	G	A	G	0.117639	-0.0660641	0.0925681	0.0882869	FALSE	FALSE	FALSE	KIRC	219082963	0.307232	0.0647022	outcome	TRUE	reported	380248	378749	1499	2	219947685	0.0205117	9.75124346818886e-09	31569	NA	NA	eqtl-a-ENSG00000018280	TRUE	reported	eqtl-a-ENSG00000018280	rs55838820	9.75124346818886e-09	2	1	TRUE	0.0322631572020788	32.8926857750243	SLC11A1	ENSG00000018280
366	eqtl-a-ENSG00000018280	rs56033548	T	C	T	C	0.111958	-0.0626358	0.0948777	0.0885724	FALSE	FALSE	FALSE	KIRC	219071772	0.332086	0.0645782	outcome	TRUE	reported	380248	378749	1499	2	219936494	0.0202881	3.42097578428851e-08	31567	NA	NA	eqtl-a-ENSG00000018280	TRUE	reported	eqtl-a-ENSG00000018280	rs56033548	3.42097578428851e-08	2	1	TRUE	0.0310457004548857	30.4528195948343	SLC11A1	ENSG00000018280
367	eqtl-a-ENSG00000018280	rs56330463	C	T	C	T	-0.0658972	0.0565786	0.582097	0.626996	FALSE	FALSE	FALSE	KIRC	148820448	0.138803	0.038222	outcome	TRUE	reported	380248	378749	1499	5	148200011	0.0120545	4.59272032776947e-08	31569	NA	NA	eqtl-a-ENSG00000018280	TRUE	reported	eqtl-a-ENSG00000018280	rs56330463	4.59272032776947e-08	2	1	TRUE	-0.0307536	29.883779320784	SLC11A1	ENSG00000018280
368	eqtl-a-ENSG00000018280	rs56388170	T	G	T	G	-0.0999713	0.0600694	0.289189	0.283094	FALSE	FALSE	FALSE	KIRC	28684757	0.142779	0.0409884	outcome	TRUE	reported	380248	378749	1499	7	28724374	0.0131003	2.32594799353611e-14	31355	NA	NA	eqtl-a-ENSG00000018280	TRUE	reported	eqtl-a-ENSG00000018280	rs56388170	2.32594799353611e-14	2	1	TRUE	-0.0430578	58.2355520483055	SLC11A1	ENSG00000018280
369	eqtl-a-ENSG00000018280	rs56388436	T	C	T	C	0.115889	-0.062523	0.0953479	0.0885671	FALSE	FALSE	FALSE	KIRC	219094181	0.333032	0.0645882	outcome	TRUE	reported	380248	378749	1499	2	219958903	0.0202416	1.03309438237046e-08	31300	NA	NA	eqtl-a-ENSG00000018280	TRUE	reported	eqtl-a-ENSG00000018280	rs56388436	1.03309438237046e-08	2	1	TRUE	0.0323453444887769	32.7789285770357	SLC11A1	ENSG00000018280
370	eqtl-a-ENSG00000018280	rs596076	G	T	G	T	-0.238384	-0.0271716	0.584246	0.572143	FALSE	FALSE	FALSE	KIRC	218586292	0.466539	0.0373174	outcome	TRUE	reported	380248	378749	1499	2	219451015	0.0119083	3.82296216565926e-89	31569	NA	NA	eqtl-a-ENSG00000018280	TRUE	reported	eqtl-a-ENSG00000018280	rs596076	3.82296216565926e-89	2	1	TRUE	-0.111962	400.732597501736	SLC11A1	ENSG00000018280
371	eqtl-a-ENSG00000018280	rs61041183	A	G	A	G	-0.254266	-0.0443296	0.597081	0.654544	FALSE	FALSE	FALSE	KIRC	218191657	0.25497	0.0389416	outcome	TRUE	reported	380248	378749	1499	2	219056380	0.0119442	1.47910838816821e-100	31553	NA	NA	eqtl-a-ENSG00000018280	TRUE	reported	eqtl-a-ENSG00000018280	rs61041183	1.47910838816821e-100	2	1	TRUE	-0.118995	453.171352912284	SLC11A1	ENSG00000018280
372	eqtl-a-ENSG00000018280	rs62182083	A	T	A	T	-0.727194	0.0274535	0.103192	0.120242	FALSE	TRUE	FALSE	KIRC	218336470	0.633142	0.0575171	outcome	TRUE	reported	380248	378749	1499	2	219201193	0.0185826	1e-200	31676	NA	NA	eqtl-a-ENSG00000018280	TRUE	reported	eqtl-a-ENSG00000018280	rs62182083	1e-200	2	1	TRUE	-0.214753	1531.39638177948	SLC11A1	ENSG00000018280
373	eqtl-a-ENSG00000018280	rs62183956	T	C	T	C	-0.235925	-0.0264527	0.489446	0.560545	FALSE	FALSE	FALSE	KIRC	218181399	0.477898	0.0372737	outcome	TRUE	reported	380248	378749	1499	2	219046122	0.0117394	7.870457896951e-90	31558	NA	NA	eqtl-a-ENSG00000018280	TRUE	reported	eqtl-a-ENSG00000018280	rs62183956	7.870457896951e-90	2	1	TRUE	-0.112415	403.883513828469	SLC11A1	ENSG00000018280
374	eqtl-a-ENSG00000018280	rs6436011	C	T	C	T	-0.0605332	0.000150243	0.435285	0.493623	FALSE	FALSE	FALSE	KIRC	217764120	0.99676	0.0370023	outcome	TRUE	reported	380248	378749	1499	2	218628843	0.0119937	4.48332270432733e-07	31568	NA	NA	eqtl-a-ENSG00000018280	TRUE	reported	eqtl-a-ENSG00000018280	rs6436011	4.48332270432733e-07	2	1	TRUE	-0.0283959	25.4730473331356	SLC11A1	ENSG00000018280
375	eqtl-a-ENSG00000018280	rs6436032	C	T	C	T	0.228074	0.0135622	0.483786	0.418892	FALSE	FALSE	FALSE	KIRC	218118139	0.716515	0.0373492	outcome	TRUE	reported	380248	378749	1499	2	218982862	0.011754	7.16638275455864e-84	31564	NA	NA	eqtl-a-ENSG00000018280	TRUE	reported	eqtl-a-ENSG00000018280	rs6436032	7.16638275455864e-84	2	1	TRUE	0.108575726900869	376.513182165074	SLC11A1	ENSG00000018280
376	eqtl-a-ENSG00000018280	rs6436066	G	T	G	T	0.22552	0.022765	0.427318	0.43874	FALSE	FALSE	FALSE	KIRC	218713638	0.540312	0.0371771	outcome	TRUE	reported	380248	378749	1499	2	219578361	0.0118806	2.39386690117416e-80	31684	NA	NA	eqtl-a-ENSG00000018280	TRUE	reported	eqtl-a-ENSG00000018280	rs6436066	2.39386690117416e-80	2	1	TRUE	0.106043653966941	360.324155479619	SLC11A1	ENSG00000018280
377	eqtl-a-ENSG00000018280	rs6436069	C	T	C	T	0.204616	-0.0113099	0.464267	0.510044	FALSE	FALSE	FALSE	KIRC	218732462	0.759665	0.0369697	outcome	TRUE	reported	380248	378749	1499	2	219597185	0.0118091	2.95324855405547e-67	31563	NA	NA	eqtl-a-ENSG00000018280	TRUE	reported	eqtl-a-ENSG00000018280	rs6436069	2.95324855405547e-67	2	1	TRUE	0.0970714599535458	300.224119954318	SLC11A1	ENSG00000018280
378	eqtl-a-ENSG00000018280	rs6720105	A	G	A	G	0.257117	0.0446129	0.388329	0.339334	FALSE	FALSE	FALSE	KIRC	218215995	0.252876	0.0390181	outcome	TRUE	reported	380248	378749	1499	2	219080718	0.0120187	1.55238700995809e-101	31568	NA	NA	eqtl-a-ENSG00000018280	TRUE	reported	eqtl-a-ENSG00000018280	rs6720105	1.55238700995809e-101	2	1	TRUE	0.119546753958065	457.663834165004	SLC11A1	ENSG00000018280
379	eqtl-a-ENSG00000018280	rs6728227	G	A	G	A	0.231893	0.0147424	0.473955	0.408938	FALSE	FALSE	FALSE	KIRC	218130399	0.693983	0.037469	outcome	TRUE	reported	380248	378749	1499	2	218995122	0.0117588	1.42955214003701e-86	31568	NA	NA	eqtl-a-ENSG00000018280	TRUE	reported	eqtl-a-ENSG00000018280	rs6728227	1.42955214003701e-86	2	1	TRUE	0.110320401827243	388.910143696384	SLC11A1	ENSG00000018280
380	eqtl-a-ENSG00000018280	rs6751232	T	C	T	C	0.101134	-0.0190667	0.118989	0.129571	FALSE	FALSE	FALSE	KIRC	219151208	0.728155	0.0548554	outcome	TRUE	reported	380248	378749	1499	2	220015930	0.0183626	3.64166506573214e-08	31569	NA	NA	eqtl-a-ENSG00000018280	TRUE	reported	eqtl-a-ENSG00000018280	rs6751232	3.64166506573214e-08	2	1	TRUE	0.0309840219728748	30.3337442855237	SLC11A1	ENSG00000018280
381	eqtl-a-ENSG00000018280	rs678218	A	C	A	C	-0.241593	-0.0281075	0.584899	0.57176	FALSE	FALSE	FALSE	KIRC	218514986	0.451147	0.0373023	outcome	TRUE	reported	380248	378749	1499	2	219379709	0.0119065	1.55060078679425e-91	31683	NA	NA	eqtl-a-ENSG00000018280	TRUE	reported	eqtl-a-ENSG00000018280	rs678218	1.55060078679425e-91	2	1	TRUE	-0.113265	411.718574891283	SLC11A1	ENSG00000018280
382	eqtl-a-ENSG00000018280	rs690991	G	T	G	T	0.211658	-0.0137308	0.440558	0.514166	FALSE	FALSE	FALSE	KIRC	218768350	0.710181	0.0369492	outcome	TRUE	reported	380248	378749	1499	2	219633073	0.0118554	2.72960622551356e-71	26331	NA	NA	eqtl-a-ENSG00000018280	TRUE	reported	eqtl-a-ENSG00000018280	rs690991	2.72960622551356e-71	2	1	TRUE	0.109367499541559	318.740282278178	SLC11A1	ENSG00000018280
383	eqtl-a-ENSG00000018280	rs691066	T	C	T	C	0.176858	-0.027809	0.508899	0.581117	FALSE	FALSE	FALSE	KIRC	218813698	0.465575	0.0381103	outcome	TRUE	reported	380248	378749	1499	2	219678421	0.0118119	1.1056050150387e-50	30077	NA	NA	eqtl-a-ENSG00000018280	TRUE	reported	eqtl-a-ENSG00000018280	rs691066	1.1056050150387e-50	2	1	TRUE	0.0860180240775408	224.186726634656	SLC11A1	ENSG00000018280
384	eqtl-a-ENSG00000018280	rs711186	A	G	A	G	-0.237578	-0.0278644	0.592112	0.571902	FALSE	FALSE	FALSE	KIRC	218481379	0.455171	0.0373108	outcome	TRUE	reported	380248	378749	1499	2	219346102	0.0119445	4.96706679223424e-88	31684	NA	NA	eqtl-a-ENSG00000018280	TRUE	reported	eqtl-a-ENSG00000018280	rs711186	4.96706679223424e-88	2	1	TRUE	-0.111055	395.618411139072	SLC11A1	ENSG00000018280
385	eqtl-a-ENSG00000018280	rs72951243	T	C	T	C	-0.543879	-0.0262098	0.0841512	0.141879	FALSE	FALSE	FALSE	KIRC	218325867	0.624492	0.0535446	outcome	TRUE	reported	380248	378749	1499	2	219190590	0.0209444	1.14551294144553e-148	30547	NA	NA	eqtl-a-ENSG00000018280	TRUE	reported	eqtl-a-ENSG00000018280	rs72951243	1.14551294144553e-148	2	1	TRUE	-0.146968	674.324181156545	SLC11A1	ENSG00000018280
386	eqtl-a-ENSG00000018280	rs72951747	A	T	A	T	0.118885	-0.0658509	0.092436	0.0882683	FALSE	TRUE	FALSE	KIRC	219107321	0.308905	0.0647169	outcome	TRUE	reported	380248	378749	1499	2	219972043	0.0205244	6.93873018304014e-09	31569	NA	NA	eqtl-a-ENSG00000018280	TRUE	reported	eqtl-a-ENSG00000018280	rs72951747	6.93873018304014e-09	2	1	TRUE	0.0325843648833978	33.5515960334323	SLC11A1	ENSG00000018280
387	eqtl-a-ENSG00000018280	rs72951773	T	A	T	A	0.106372	-0.000503297	0.122079	0.144298	FALSE	TRUE	FALSE	KIRC	219126435	0.992338	0.05241	outcome	TRUE	reported	380248	378749	1499	2	219991157	0.018158	4.68468074911136e-09	31566	NA	NA	eqtl-a-ENSG00000018280	TRUE	reported	eqtl-a-ENSG00000018280	rs72951773	4.68468074911136e-09	2	1	TRUE	0.0329554565266109	34.3177357866947	SLC11A1	ENSG00000018280
388	eqtl-a-ENSG00000018280	rs72951800	G	A	G	A	0.103516	-0.0196519	0.11636	0.129038	FALSE	FALSE	FALSE	KIRC	219140689	0.72041	0.0549073	outcome	TRUE	reported	380248	378749	1499	2	220005411	0.0185407	2.36129365428952e-08	31566	NA	NA	eqtl-a-ENSG00000018280	TRUE	reported	eqtl-a-ENSG00000018280	rs72951800	2.36129365428952e-08	2	1	TRUE	0.0314102211463628	31.1718595088155	SLC11A1	ENSG00000018280
389	eqtl-a-ENSG00000018280	rs72966064	A	G	A	G	-0.194851	0.0671272	0.0466652	0.0864607	FALSE	FALSE	FALSE	KIRC	218824799	0.309555	0.06606	outcome	TRUE	reported	380248	378749	1499	2	219689522	0.0281702	4.61317574560379e-12	18629	NA	NA	eqtl-a-ENSG00000018280	TRUE	reported	eqtl-a-ENSG00000018280	rs72966064	4.61317574560379e-12	2	1	TRUE	-0.0506156	47.843772570861	SLC11A1	ENSG00000018280
390	eqtl-a-ENSG00000018280	rs749387	C	T	C	T	0.0953029	0.00835866	0.156157	0.142843	FALSE	FALSE	FALSE	KIRC	217861303	0.873557	0.0525233	outcome	TRUE	reported	380248	378749	1499	2	218726026	0.0163762	5.9059531836404e-09	31558	NA	NA	eqtl-a-ENSG00000018280	TRUE	reported	eqtl-a-ENSG00000018280	rs749387	5.9059531836404e-09	2	1	TRUE	0.0327430460414271	33.8677203360411	SLC11A1	ENSG00000018280
391	eqtl-a-ENSG00000018280	rs75746429	T	C	T	C	0.0886585	-0.0230333	0.117922	0.118202	FALSE	FALSE	FALSE	KIRC	217960627	0.688492	0.0574536	outcome	TRUE	reported	380248	378749	1499	2	218825350	0.018439	1.52450902603299e-06	31567	NA	NA	eqtl-a-ENSG00000018280	TRUE	reported	eqtl-a-ENSG00000018280	rs75746429	1.52450902603299e-06	2	1	TRUE	0.0270533551163281	23.1188394968374	SLC11A1	ENSG00000018280
392	eqtl-a-ENSG00000018280	rs7580751	C	T	C	T	0.235016	0.0132908	0.467617	0.40794	FALSE	FALSE	FALSE	KIRC	218104198	0.723144	0.0375171	outcome	TRUE	reported	380248	378749	1499	2	218968921	0.0117634	8.45668200099353e-89	31231	NA	NA	eqtl-a-ENSG00000018280	TRUE	reported	eqtl-a-ENSG00000018280	rs7580751	8.45668200099353e-89	2	1	TRUE	0.112338265632238	399.143563802916	SLC11A1	ENSG00000018280
393	eqtl-a-ENSG00000018280	rs7582112	C	T	C	T	0.0770723	-0.0684446	0.207043	0.145863	FALSE	FALSE	FALSE	KIRC	217826604	0.195898	0.0529214	outcome	TRUE	reported	380248	378749	1499	2	218691327	0.0146746	1.50459633638624e-07	30077	NA	NA	eqtl-a-ENSG00000018280	TRUE	reported	eqtl-a-ENSG00000018280	rs7582112	1.50459633638624e-07	2	1	TRUE	0.0302712361263926	27.5844351135231	SLC11A1	ENSG00000018280
394	eqtl-a-ENSG00000018280	rs7582329	T	C	T	C	0.200122	-0.0106634	0.46603	0.509973	FALSE	FALSE	FALSE	KIRC	218756186	0.772962	0.0369612	outcome	TRUE	reported	380248	378749	1499	2	219620909	0.0118116	2.17520403401952e-64	31569	NA	NA	eqtl-a-ENSG00000018280	TRUE	reported	eqtl-a-ENSG00000018280	rs7582329	2.17520403401952e-64	2	1	TRUE	0.0949300497845784	287.059686852741	SLC11A1	ENSG00000018280
395	eqtl-a-ENSG00000018280	rs7592327	C	T	C	T	-0.353528	-0.016671	0.684765	0.737497	FALSE	FALSE	FALSE	KIRC	218373478	0.691353	0.0419904	outcome	TRUE	reported	380248	378749	1499	2	219238201	0.0124598	4.30526610491697e-177	30077	NA	NA	eqtl-a-ENSG00000018280	TRUE	reported	eqtl-a-ENSG00000018280	rs7592327	4.30526610491697e-177	2	1	TRUE	-0.161463	805.054886038854	SLC11A1	ENSG00000018280
396	eqtl-a-ENSG00000018280	rs75928081	A	G	A	G	0.203891	-0.0338251	0.0240022	0.0275826	FALSE	FALSE	FALSE	KIRC	219235411	0.765399	0.113356	outcome	TRUE	reported	380248	378749	1499	2	220100133	0.0388482	1.53588960121031e-07	28302	NA	NA	eqtl-a-ENSG00000018280	TRUE	reported	eqtl-a-ENSG00000018280	rs75928081	1.53588960121031e-07	2	1	TRUE	0.0311833436156971	27.5457315038767	SLC11A1	ENSG00000018280
397	eqtl-a-ENSG00000018280	rs77939743	G	A	G	A	0.39031	-0.00754321	0.0238749	0.028356	FALSE	FALSE	FALSE	KIRC	217997136	0.947167	0.113835	outcome	TRUE	reported	380248	378749	1499	2	218861859	0.0388484	9.47109079470164e-24	25829	NA	NA	eqtl-a-ENSG00000018280	TRUE	reported	eqtl-a-ENSG00000018280	rs77939743	9.47109079470164e-24	2	1	TRUE	0.0623953917835847	100.942273758631	SLC11A1	ENSG00000018280
398	eqtl-a-ENSG00000018280	rs78844450	C	T	C	T	0.706558	-0.442441	0.0138889	0.00102059	FALSE	FALSE	FALSE	KIRC	218395693	0.417078	0.545213	outcome	TRUE	reported	380248	378749	1499	2	219260416	0.0505077	1.81970085860998e-44	1404	NA	NA	eqtl-a-ENSG00000018280	TRUE	reported	eqtl-a-ENSG00000018280	rs78844450	1.81970085860998e-44	2	1	TRUE	0.349980013503619	195.695325362882	SLC11A1	ENSG00000018280
399	eqtl-a-ENSG00000018280	rs934045	A	G	A	G	-0.201988	-0.0221778	0.456518	0.513541	FALSE	FALSE	FALSE	KIRC	218042265	0.549051	0.0370134	outcome	TRUE	reported	380248	378749	1499	2	218906988	0.0118272	2.14931465541919e-65	31684	NA	NA	eqtl-a-ENSG00000018280	TRUE	reported	eqtl-a-ENSG00000018280	rs934045	2.14931465541919e-65	2	1	TRUE	-0.0955097	291.666974238742	SLC11A1	ENSG00000018280
400	eqtl-a-ENSG00000018280	rs9967806	A	G	A	G	-0.191431	0.139267	0.0322772	0.0210776	FALSE	FALSE	FALSE	KIRC	219014034	0.263971	0.124674	outcome	TRUE	reported	380248	378749	1499	2	219878756	0.0336375	1.26150797388242e-08	27041	NA	NA	eqtl-a-ENSG00000018280	TRUE	reported	eqtl-a-ENSG00000018280	rs9967806	1.26150797388242e-08	2	1	TRUE	-0.0345886	32.3874767703457	SLC11A1	ENSG00000018280
401	eqtl-a-ENSG00000023445	rs10791501	C	G	C	G	0.0581552	0.0934789	0.667591	0.701932	FALSE	TRUE	FALSE	KIRC	101560595	0.0206738	0.040399	outcome	TRUE	reported	380248	378749	1499	11	101431326	0.0126249	4.0930778031715e-06	31568	NA	NA	eqtl-a-ENSG00000023445	TRUE	reported	eqtl-a-ENSG00000023445	rs10791501	4.0930778031715e-06	2	1	TRUE	0.0259182045066743	21.2188192645989	BIRC3	ENSG00000023445
402	eqtl-a-ENSG00000023445	rs10791527	C	A	C	A	-0.0845234	0.0147384	0.343644	0.382695	FALSE	FALSE	FALSE	KIRC	101837421	0.69816	0.0380046	outcome	TRUE	reported	380248	378749	1499	11	101708152	0.0125118	1.42265632813718e-11	27156	NA	NA	eqtl-a-ENSG00000023445	TRUE	reported	eqtl-a-ENSG00000023445	rs10791527	1.42265632813718e-11	2	1	TRUE	-0.0409615	45.6367101670732	BIRC3	ENSG00000023445
403	eqtl-a-ENSG00000023445	rs10791537	C	T	C	T	-0.0821629	0.0291608	0.222447	0.229272	FALSE	FALSE	FALSE	KIRC	101870907	0.505101	0.043753	outcome	TRUE	reported	380248	378749	1499	11	101741638	0.0142942	9.03046263497261e-09	31569	NA	NA	eqtl-a-ENSG00000023445	TRUE	reported	eqtl-a-ENSG00000023445	rs10791537	9.03046263497261e-09	2	1	TRUE	-0.0323349	33.0393740345753	BIRC3	ENSG00000023445
404	eqtl-a-ENSG00000023445	rs10895191	G	A	G	A	-0.0823737	0.00982925	0.292794	0.287896	FALSE	FALSE	FALSE	KIRC	101745783	0.808716	0.040603	outcome	TRUE	reported	380248	378749	1499	11	101616514	0.0130611	2.84859035838706e-10	31568	NA	NA	eqtl-a-ENSG00000023445	TRUE	reported	eqtl-a-ENSG00000023445	rs10895191	2.84859035838706e-10	2	1	TRUE	-0.0354753	39.7756823182499	BIRC3	ENSG00000023445
405	eqtl-a-ENSG00000023445	rs112065649	C	T	C	T	-0.195925	0.30372	0.0371354	0.0229927	FALSE	FALSE	FALSE	KIRC	102808669	0.0057771	0.110037	outcome	TRUE	reported	380248	378749	1499	11	102679400	0.0314319	4.56415095641635e-10	31061	NA	NA	eqtl-a-ENSG00000023445	TRUE	reported	eqtl-a-ENSG00000023445	rs112065649	4.56415095641635e-10	2	1	TRUE	-0.0353471	38.8542421661309	BIRC3	ENSG00000023445
406	eqtl-a-ENSG00000023445	rs112081269	T	C	T	C	-0.111458	0.0224553	0.164647	0.217205	FALSE	FALSE	FALSE	KIRC	102104814	0.615088	0.0446582	outcome	TRUE	reported	380248	378749	1499	11	101975545	0.016021	3.47616193815381e-12	31231	NA	NA	eqtl-a-ENSG00000023445	TRUE	reported	eqtl-a-ENSG00000023445	rs112081269	3.47616193815381e-12	2	1	TRUE	-0.0393375	48.3997647569807	BIRC3	ENSG00000023445
407	eqtl-a-ENSG00000023445	rs11225017	T	C	T	C	-0.16786	0.0699543	0.106094	0.111241	FALSE	FALSE	FALSE	KIRC	101816999	0.233529	0.0587201	outcome	TRUE	reported	380248	378749	1499	11	101687730	0.0192748	3.06549067942578e-18	31509	NA	NA	eqtl-a-ENSG00000023445	TRUE	reported	eqtl-a-ENSG00000023445	rs11225017	3.06549067942578e-18	2	1	TRUE	-0.049004	75.842855645242	BIRC3	ENSG00000023445
408	eqtl-a-ENSG00000023445	rs11225040	C	T	C	T	-0.163988	0.0707991	0.107683	0.114038	FALSE	FALSE	FALSE	KIRC	101851300	0.22248	0.0580339	outcome	TRUE	reported	380248	378749	1499	11	101722031	0.0191507	1.09976526803857e-17	31509	NA	NA	eqtl-a-ENSG00000023445	TRUE	reported	eqtl-a-ENSG00000023445	rs11225040	1.09976526803857e-17	2	1	TRUE	-0.0481858	73.3254661285403	BIRC3	ENSG00000023445
409	eqtl-a-ENSG00000023445	rs11225178	T	C	T	C	-0.143435	-0.0100971	0.151457	0.186616	FALSE	FALSE	FALSE	KIRC	102240335	0.830634	0.0472076	outcome	TRUE	reported	380248	378749	1499	11	102111066	0.0165581	4.61105178875981e-18	31561	NA	NA	eqtl-a-ENSG00000023445	TRUE	reported	eqtl-a-ENSG00000023445	rs11225178	4.61105178875981e-18	2	1	TRUE	-0.0487043	75.0393862480952	BIRC3	ENSG00000023445
410	eqtl-a-ENSG00000023445	rs11225211	A	G	A	G	-0.222826	0.0738754	0.169679	0.247943	FALSE	FALSE	FALSE	KIRC	102334727	0.0850962	0.0429045	outcome	TRUE	reported	380248	378749	1499	11	102205458	0.0157452	1.81008929527076e-45	28587	NA	NA	eqtl-a-ENSG00000023445	TRUE	reported	eqtl-a-ENSG00000023445	rs11225211	1.81008929527076e-45	2	1	TRUE	-0.0834128	200.278977447064	BIRC3	ENSG00000023445
411	eqtl-a-ENSG00000023445	rs1123739	G	A	G	A	-0.0834189	0.00993492	0.293285	0.287843	FALSE	FALSE	FALSE	KIRC	101757978	0.806546	0.0405699	outcome	TRUE	reported	380248	378749	1499	11	101628709	0.0130542	1.65451229944233e-10	31568	NA	NA	eqtl-a-ENSG00000023445	TRUE	reported	eqtl-a-ENSG00000023445	rs1123739	1.65451229944233e-10	2	1	TRUE	-0.0359438	40.8346082243887	BIRC3	ENSG00000023445
412	eqtl-a-ENSG00000023445	rs112507649	G	A	G	A	-0.161627	-0.124903	0.0640987	0.0507812	FALSE	FALSE	FALSE	KIRC	102753158	0.130522	0.0826055	outcome	TRUE	reported	380248	378749	1499	11	102623889	0.0242618	2.70520386971935e-11	31386	NA	NA	eqtl-a-ENSG00000023445	TRUE	reported	eqtl-a-ENSG00000023445	rs112507649	2.70520386971935e-11	2	1	TRUE	-0.0375777	44.3794368759836	BIRC3	ENSG00000023445
413	eqtl-a-ENSG00000023445	rs11604735	T	C	T	C	-0.0606533	-0.0940562	0.329874	0.300551	FALSE	FALSE	FALSE	KIRC	101592037	0.0196083	0.0403025	outcome	TRUE	reported	380248	378749	1499	11	101462768	0.0126485	1.62349142836447e-06	31479	NA	NA	eqtl-a-ENSG00000023445	TRUE	reported	eqtl-a-ENSG00000023445	rs11604735	1.62349142836447e-06	2	1	TRUE	-0.0270184	22.9948626236193	BIRC3	ENSG00000023445
414	eqtl-a-ENSG00000023445	rs116883973	A	G	A	G	-0.171641	0.202914	0.0366515	0.0211165	FALSE	FALSE	FALSE	KIRC	102925480	0.11436	0.128517	outcome	TRUE	reported	380248	378749	1499	11	102796209	0.0316413	5.80844658633463e-08	31063	NA	NA	eqtl-a-ENSG00000023445	TRUE	reported	eqtl-a-ENSG00000023445	rs116883973	5.80844658633463e-08	2	1	TRUE	-0.0307647	29.4261493861456	BIRC3	ENSG00000023445
415	eqtl-a-ENSG00000023445	rs117022006	T	C	T	C	-0.179421	0.271742	0.0270159	0.007625	FALSE	FALSE	FALSE	KIRC	102891646	0.203566	0.213725	outcome	TRUE	reported	380248	378749	1499	11	102762376	0.0366787	9.9917141283461e-07	30486	NA	NA	eqtl-a-ENSG00000023445	TRUE	reported	eqtl-a-ENSG00000023445	rs117022006	9.9917141283461e-07	2	1	TRUE	-0.0280061	23.9286763997473	BIRC3	ENSG00000023445
416	eqtl-a-ENSG00000023445	rs117442136	A	G	A	G	-0.283515	-0.000333429	0.0458253	0.0305604	FALSE	FALSE	FALSE	KIRC	102544403	0.997543	0.108298	outcome	TRUE	reported	380248	378749	1499	11	102415134	0.0283626	1.58343412391458e-23	31065	NA	NA	eqtl-a-ENSG00000023445	TRUE	reported	eqtl-a-ENSG00000023445	rs117442136	1.58343412391458e-23	2	1	TRUE	-0.0566254	99.9217432255895	BIRC3	ENSG00000023445
417	eqtl-a-ENSG00000023445	rs117532287	T	C	T	C	-0.494418	0.105959	0.0208078	0.0101828	FALSE	FALSE	FALSE	KIRC	102067336	0.565104	0.184188	outcome	TRUE	reported	380248	378749	1499	11	101938067	0.0414881	9.62941712971562e-33	23049	NA	NA	eqtl-a-ENSG00000023445	TRUE	reported	eqtl-a-ENSG00000023445	rs117532287	9.62941712971562e-33	2	1	TRUE	-0.0782581	142.017366332209	BIRC3	ENSG00000023445
418	eqtl-a-ENSG00000023445	rs117608764	C	T	C	T	-0.296326	0.395483	0.0128813	0.0155924	FALSE	FALSE	FALSE	KIRC	101733202	0.00271388	0.131897	outcome	TRUE	reported	380248	378749	1499	11	101603933	0.0527224	1.90300530951489e-08	19835	NA	NA	eqtl-a-ENSG00000023445	TRUE	reported	eqtl-a-ENSG00000023445	rs117608764	1.90300530951489e-08	2	1	TRUE	-0.0398781	31.5899671178205	BIRC3	ENSG00000023445
419	eqtl-a-ENSG00000023445	rs117926200	C	A	C	A	-0.29627	0.112486	0.025369	0.0123068	FALSE	FALSE	FALSE	KIRC	101450870	0.505152	0.168795	outcome	TRUE	reported	380248	378749	1499	11	101321601	0.0377683	4.34310170886093e-15	26617	NA	NA	eqtl-a-ENSG00000023445	TRUE	reported	eqtl-a-ENSG00000023445	rs117926200	4.34310170886093e-15	2	1	TRUE	-0.0480281	61.5347557018799	BIRC3	ENSG00000023445
420	eqtl-a-ENSG00000023445	rs118066867	G	A	G	A	-0.467833	0.205275	0.0216424	0.0106591	FALSE	FALSE	FALSE	KIRC	102209262	0.247086	0.17735	outcome	TRUE	reported	380248	378749	1499	11	102079993	0.0407119	1.45713570473042e-30	23049	NA	NA	eqtl-a-ENSG00000023445	TRUE	reported	eqtl-a-ENSG00000023445	rs118066867	1.45713570473042e-30	2	1	TRUE	-0.0754782	132.050169618937	BIRC3	ENSG00000023445
421	eqtl-a-ENSG00000023445	rs12195582	T	C	T	C	-0.0562157	-0.10067	0.413936	0.43577	FALSE	FALSE	FALSE	KIRC	32476767	0.00679	0.037189	outcome	TRUE	reported	380248	378749	1499	6	32444544	0.0120746	3.22730491959522e-06	26387	NA	NA	eqtl-a-ENSG00000023445	TRUE	reported	eqtl-a-ENSG00000023445	rs12195582	3.22730491959522e-06	2	1	TRUE	-0.0286502	21.6755307530076	BIRC3	ENSG00000023445
422	eqtl-a-ENSG00000023445	rs12222241	A	G	A	G	-0.165845	0.070182	0.105855	0.111238	FALSE	FALSE	FALSE	KIRC	101794222	0.232064	0.0587267	outcome	TRUE	reported	380248	378749	1499	11	101664953	0.0192953	8.31189407445617e-18	31394	NA	NA	eqtl-a-ENSG00000023445	TRUE	reported	eqtl-a-ENSG00000023445	rs12222241	8.31189407445617e-18	2	1	TRUE	-0.0484541	73.8757145835464	BIRC3	ENSG00000023445
423	eqtl-a-ENSG00000023445	rs1365331	G	A	G	A	-0.0655425	0.0295521	0.533184	0.531059	FALSE	FALSE	FALSE	KIRC	102115381	0.42331	0.0369082	outcome	TRUE	reported	380248	378749	1499	11	101986112	0.011917	3.80215659780753e-08	31684	NA	NA	eqtl-a-ENSG00000023445	TRUE	reported	eqtl-a-ENSG00000023445	rs1365331	3.80215659780753e-08	2	1	TRUE	-0.0308846	30.2490769559381	BIRC3	ENSG00000023445
424	eqtl-a-ENSG00000023445	rs141888770	A	G	A	G	-0.245541	0.369294	0.0138866	0.0160111	FALSE	FALSE	FALSE	KIRC	101972283	0.0047991	0.130945	outcome	TRUE	reported	380248	378749	1499	11	101843014	0.0508187	1.35300686449196e-06	6157	NA	NA	eqtl-a-ENSG00000023445	TRUE	reported	eqtl-a-ENSG00000023445	rs141888770	1.35300686449196e-06	2	1	TRUE	-0.0614702	23.3453795042805	BIRC3	ENSG00000023445
425	eqtl-a-ENSG00000023445	rs142225998	C	A	C	A	-0.205318	0.310779	0.0366009	0.0197493	FALSE	FALSE	FALSE	KIRC	102824540	0.00908406	0.119124	outcome	TRUE	reported	380248	378749	1499	11	102695271	0.0316482	8.72167702203095e-11	31058	NA	NA	eqtl-a-ENSG00000023445	TRUE	reported	eqtl-a-ENSG00000023445	rs142225998	8.72167702203095e-11	2	1	TRUE	-0.0367884	42.087780267808	BIRC3	ENSG00000023445
426	eqtl-a-ENSG00000023445	rs1426395	T	G	T	G	-0.0658077	0.0268076	0.534257	0.534285	FALSE	FALSE	FALSE	KIRC	102155562	0.468107	0.0369473	outcome	TRUE	reported	380248	378749	1499	11	102026293	0.0119187	3.36689831274942e-08	31566	NA	NA	eqtl-a-ENSG00000023445	TRUE	reported	eqtl-a-ENSG00000023445	rs1426395	3.36689831274942e-08	2	1	TRUE	-0.0310629	30.4856632263464	BIRC3	ENSG00000023445
427	eqtl-a-ENSG00000023445	rs143544926	C	T	C	T	-0.148628	0.317076	0.0350645	0.0137444	FALSE	FALSE	FALSE	KIRC	103236091	0.0428509	0.156569	outcome	TRUE	reported	380248	378749	1499	11	103106820	0.0323323	4.28617599824862e-06	27776	NA	NA	eqtl-a-ENSG00000023445	TRUE	reported	eqtl-a-ENSG00000023445	rs143544926	4.28617599824862e-06	2	1	TRUE	-0.0275727	21.1313901233869	BIRC3	ENSG00000023445
428	eqtl-a-ENSG00000023445	rs144981031	A	G	A	G	-0.328465	0.311923	0.0138104	0.0199283	FALSE	FALSE	FALSE	KIRC	102021070	0.0199471	0.134025	outcome	TRUE	reported	380248	378749	1499	11	101891801	0.050924	1.11699183881598e-10	15568	NA	NA	eqtl-a-ENSG00000023445	TRUE	reported	eqtl-a-ENSG00000023445	rs144981031	1.11699183881598e-10	2	1	TRUE	-0.0516296	41.6038172675161	BIRC3	ENSG00000023445
429	eqtl-a-ENSG00000023445	rs148235786	A	G	A	G	-0.312937	0.307851	0.0148246	0.0197839	FALSE	FALSE	FALSE	KIRC	101933913	0.0211174	0.133507	outcome	TRUE	reported	380248	378749	1499	11	101804644	0.0491783	1.97337671769151e-10	15481	NA	NA	eqtl-a-ENSG00000023445	TRUE	reported	eqtl-a-ENSG00000023445	rs148235786	1.97337671769151e-10	2	1	TRUE	-0.0510793	40.4917741495367	BIRC3	ENSG00000023445
430	eqtl-a-ENSG00000023445	rs148772893	G	A	G	A	-0.513114	0.0202979	0.0154195	0.0113005	FALSE	FALSE	FALSE	KIRC	102019055	0.906948	0.17365	outcome	TRUE	reported	380248	378749	1499	11	101889786	0.0481106	1.47774670617199e-26	20510	NA	NA	eqtl-a-ENSG00000023445	TRUE	reported	eqtl-a-ENSG00000023445	rs148772893	1.47774670617199e-26	2	1	TRUE	-0.0742695	113.748631990781	BIRC3	ENSG00000023445
431	eqtl-a-ENSG00000023445	rs1616349	A	C	A	C	0.0720944	0.111577	0.807208	0.816081	FALSE	FALSE	FALSE	KIRC	102603736	0.0190498	0.0475899	outcome	TRUE	reported	380248	378749	1499	11	102474467	0.0150749	1.73041391980857e-06	31684	NA	NA	eqtl-a-ENSG00000023445	TRUE	reported	eqtl-a-ENSG00000023445	rs1616349	1.73041391980857e-06	2	1	TRUE	0.0268586446512937	22.8714755405066	BIRC3	ENSG00000023445
432	eqtl-a-ENSG00000023445	rs1711402	C	T	C	T	0.105626	0.0533728	0.89541	0.924856	FALSE	FALSE	FALSE	KIRC	102589627	0.437143	0.0686885	outcome	TRUE	reported	380248	378749	1499	11	102460358	0.0194283	5.42462848330841e-08	31569	NA	NA	eqtl-a-ENSG00000023445	TRUE	reported	eqtl-a-ENSG00000023445	rs1711402	5.42462848330841e-08	2	1	TRUE	0.0305855395790277	29.5577972149058	BIRC3	ENSG00000023445
433	eqtl-a-ENSG00000023445	rs17672520	C	T	C	T	-0.333372	-0.0238375	0.0225562	0.00955504	FALSE	FALSE	FALSE	KIRC	101437718	0.900111	0.189909	outcome	TRUE	reported	380248	378749	1499	11	101308449	0.0399852	7.5805374914822e-17	24604	NA	NA	eqtl-a-ENSG00000023445	TRUE	reported	eqtl-a-ENSG00000023445	rs17672520	7.5805374914822e-17	2	1	TRUE	-0.0530801	69.5119858433332	BIRC3	ENSG00000023445
434	eqtl-a-ENSG00000023445	rs17684670	A	G	A	G	-0.220938	-0.0689375	0.064665	0.0581878	FALSE	FALSE	FALSE	KIRC	101806090	0.372405	0.0772861	outcome	TRUE	reported	380248	378749	1499	11	101676821	0.0241291	5.35549970840113e-20	30537	NA	NA	eqtl-a-ENSG00000023445	TRUE	reported	eqtl-a-ENSG00000023445	rs17684670	5.35549970840113e-20	2	1	TRUE	-0.0523281	83.8414132044285	BIRC3	ENSG00000023445
435	eqtl-a-ENSG00000023445	rs17880344	G	T	G	T	-0.1651	-0.0376296	0.0674065	0.0625137	FALSE	FALSE	FALSE	KIRC	102797956	0.623838	0.0767295	outcome	TRUE	reported	380248	378749	1499	11	102668687	0.0236975	3.23742711634234e-12	29902	NA	NA	eqtl-a-ENSG00000023445	TRUE	reported	eqtl-a-ENSG00000023445	rs17880344	3.23742711634234e-12	2	1	TRUE	-0.0402584	48.5388052930615	BIRC3	ENSG00000023445
436	eqtl-a-ENSG00000023445	rs17882391	G	A	G	A	-0.541483	0.137058	0.0727977	0.0705617	FALSE	FALSE	FALSE	KIRC	102324393	0.055999	0.0717192	outcome	TRUE	reported	380248	378749	1499	11	102195124	0.0224506	1.58854674859775e-128	25213	NA	NA	eqtl-a-ENSG00000023445	TRUE	reported	eqtl-a-ENSG00000023445	rs17882391	1.58854674859775e-128	2	1	TRUE	-0.150179	581.719669151828	BIRC3	ENSG00000023445
437	eqtl-a-ENSG00000023445	rs184990188	G	T	G	T	-0.269765	0.352061	0.014784	0.0167828	FALSE	FALSE	FALSE	KIRC	101501753	0.0068237	0.130136	outcome	TRUE	reported	380248	378749	1499	11	101372484	0.0492632	4.35050828447568e-08	14881	NA	NA	eqtl-a-ENSG00000023445	TRUE	reported	eqtl-a-ENSG00000023445	rs184990188	4.35050828447568e-08	2	1	TRUE	-0.0448476	29.9865130401279	BIRC3	ENSG00000023445
438	eqtl-a-ENSG00000023445	rs191902842	A	G	A	G	-0.472493	-0.0789938	0.0188759	0.0111293	FALSE	FALSE	FALSE	KIRC	101896676	0.649201	0.173661	outcome	TRUE	reported	380248	378749	1499	11	101767407	0.0435537	2.02488330653056e-27	27458	NA	NA	eqtl-a-ENSG00000023445	TRUE	reported	eqtl-a-ENSG00000023445	rs191902842	2.02488330653056e-27	2	1	TRUE	-0.0653315	117.690293768382	BIRC3	ENSG00000023445
439	eqtl-a-ENSG00000023445	rs1938842	T	C	T	C	-0.0714338	-0.105971	0.275628	0.246097	FALSE	FALSE	FALSE	KIRC	101609286	0.0134785	0.042888	outcome	TRUE	reported	380248	378749	1499	11	101480017	0.0133064	7.93505607227589e-08	31569	NA	NA	eqtl-a-ENSG00000023445	TRUE	reported	eqtl-a-ENSG00000023445	rs1938842	7.93505607227589e-08	2	1	TRUE	-0.0302015	28.8194944386922	BIRC3	ENSG00000023445
440	eqtl-a-ENSG00000023445	rs1939030	C	T	C	T	-0.0876892	0.022748	0.219919	0.231171	FALSE	FALSE	FALSE	KIRC	101782490	0.602193	0.0436412	outcome	TRUE	reported	380248	378749	1499	11	101653221	0.0143506	9.92567383826437e-10	31562	NA	NA	eqtl-a-ENSG00000023445	TRUE	reported	eqtl-a-ENSG00000023445	rs1939030	9.92567383826437e-10	2	1	TRUE	-0.0343756	37.338089918731	BIRC3	ENSG00000023445
441	eqtl-a-ENSG00000023445	rs1942683	G	A	G	A	0.056057	0.0128916	0.379514	0.349373	FALSE	FALSE	FALSE	KIRC	102173916	0.739621	0.0387886	outcome	TRUE	reported	380248	378749	1499	11	102044647	0.0122558	4.78960832497788e-06	31684	NA	NA	eqtl-a-ENSG00000023445	TRUE	reported	eqtl-a-ENSG00000023445	rs1942683	4.78960832497788e-06	2	1	TRUE	0.0256884883932113	20.9207077894245	BIRC3	ENSG00000023445
442	eqtl-a-ENSG00000023445	rs1943780	T	G	T	G	-0.425318	0.0652307	0.0959534	0.105127	FALSE	FALSE	FALSE	KIRC	102364484	0.275912	0.0598695	outcome	TRUE	reported	380248	378749	1499	11	102235215	0.0198882	1.81970085861e-101	28576	NA	NA	eqtl-a-ENSG00000023445	TRUE	reported	eqtl-a-ENSG00000023445	rs1943780	1.81970085861e-101	2	1	TRUE	-0.125512	457.337242258571	BIRC3	ENSG00000023445
443	eqtl-a-ENSG00000023445	rs2154991	A	G	A	G	-0.0586426	-0.0927157	0.331257	0.301047	FALSE	FALSE	FALSE	KIRC	101621718	0.0211909	0.0402313	outcome	TRUE	reported	380248	378749	1499	11	101492449	0.0126358	3.46393712178846e-06	31568	NA	NA	eqtl-a-ENSG00000023445	TRUE	reported	eqtl-a-ENSG00000023445	rs2154991	3.46393712178846e-06	2	1	TRUE	-0.0261127	21.5387724292826	BIRC3	ENSG00000023445
444	eqtl-a-ENSG00000023445	rs2186990	A	G	A	G	-0.10426	0.0404608	0.524653	0.614217	FALSE	FALSE	FALSE	KIRC	102419870	0.289548	0.0382025	outcome	TRUE	reported	380248	378749	1499	11	102290601	0.0118856	1.75509245811796e-18	31684	NA	NA	eqtl-a-ENSG00000023445	TRUE	reported	eqtl-a-ENSG00000023445	rs2186990	1.75509245811796e-18	2	1	TRUE	-0.0492225	76.9472707637178	BIRC3	ENSG00000023445
445	eqtl-a-ENSG00000023445	rs3129055	G	A	G	A	0.0665299	-0.065091	0.248502	0.166647	FALSE	FALSE	FALSE	KIRC	29702484	0.185475	0.0491592	outcome	TRUE	reported	380248	378749	1499	6	29670261	0.0137612	1.33548803065611e-06	30602	NA	NA	eqtl-a-ENSG00000023445	TRUE	reported	eqtl-a-ENSG00000023445	rs3129055	1.33548803065611e-06	2	1	TRUE	0.0276270204558289	23.3733589025527	BIRC3	ENSG00000023445
446	eqtl-a-ENSG00000023445	rs3130356	C	T	C	T	0.0924281	-0.05337	0.096984	0.0815302	FALSE	FALSE	FALSE	KIRC	30368886	0.427362	0.0672409	outcome	TRUE	reported	380248	378749	1499	6	30336663	0.0200966	4.24121218046112e-06	28692	NA	NA	eqtl-a-ENSG00000023445	TRUE	reported	eqtl-a-ENSG00000023445	rs3130356	4.24121218046112e-06	2	1	TRUE	0.0271428923136906	21.1525570074459	BIRC3	ENSG00000023445
447	eqtl-a-ENSG00000023445	rs35857777	C	T	C	T	-0.0863857	0.0429583	0.11803	0.114423	FALSE	FALSE	FALSE	KIRC	103048514	0.460629	0.058224	outcome	TRUE	reported	380248	378749	1499	11	102919243	0.0184325	2.77510870671577e-06	30399	NA	NA	eqtl-a-ENSG00000023445	TRUE	reported	eqtl-a-ENSG00000023445	rs35857777	2.77510870671577e-06	2	1	TRUE	-0.0268711	21.9641918459493	BIRC3	ENSG00000023445
448	eqtl-a-ENSG00000023445	rs3763317	T	C	T	C	-0.0554255	-0.0967325	0.465049	0.522692	FALSE	FALSE	FALSE	KIRC	32409011	0.00850922	0.0367641	outcome	TRUE	reported	380248	378749	1499	6	32376788	0.0119236	3.3451839161254e-06	29827	NA	NA	eqtl-a-ENSG00000023445	TRUE	reported	eqtl-a-ENSG00000023445	rs3763317	3.3451839161254e-06	2	1	TRUE	-0.0269063	21.6074960620779	BIRC3	ENSG00000023445
449	eqtl-a-ENSG00000023445	rs3774959	A	G	A	G	-0.0605439	-0.0554999	0.352643	0.373377	FALSE	FALSE	FALSE	KIRC	102589957	0.145441	0.0381227	outcome	TRUE	reported	380248	378749	1499	4	103511114	0.0124463	1.14691174454275e-06	31569	NA	NA	eqtl-a-ENSG00000023445	TRUE	reported	eqtl-a-ENSG00000023445	rs3774959	1.14691174454275e-06	2	1	TRUE	-0.0273685	23.662479815074	BIRC3	ENSG00000023445
450	eqtl-a-ENSG00000023445	rs4477410	A	T	A	T	0.0581981	0.097766	0.657809	0.704509	FALSE	TRUE	FALSE	KIRC	101544879	0.015787	0.0405028	outcome	TRUE	reported	380248	378749	1499	11	101415610	0.0125351	3.43391863061704e-06	21827	NA	NA	eqtl-a-ENSG00000023445	TRUE	reported	eqtl-a-ENSG00000023445	rs4477410	3.43391863061704e-06	2	1	TRUE	0.0314115607191307	21.5556938586792	BIRC3	ENSG00000023445
451	eqtl-a-ENSG00000023445	rs519698	C	T	C	T	0.0880932	-0.0451653	0.88113	0.890755	FALSE	FALSE	FALSE	KIRC	103004115	0.444072	0.0590137	outcome	TRUE	reported	380248	378749	1499	11	102874844	0.0183753	1.63331518598324e-06	31562	NA	NA	eqtl-a-ENSG00000023445	TRUE	reported	eqtl-a-ENSG00000023445	rs519698	1.63331518598324e-06	2	1	TRUE	0.0269762371737461	22.9834857438768	BIRC3	ENSG00000023445
452	eqtl-a-ENSG00000023445	rs555986	C	T	C	T	0.0842117	-0.0413797	0.878019	0.888027	FALSE	FALSE	FALSE	KIRC	103038463	0.479243	0.0584856	outcome	TRUE	reported	380248	378749	1499	11	102909192	0.0181726	3.58319134150455e-06	30743	NA	NA	eqtl-a-ENSG00000023445	TRUE	reported	eqtl-a-ENSG00000023445	rs555986	3.58319134150455e-06	2	1	TRUE	0.0264207254554195	21.4738905162336	BIRC3	ENSG00000023445
453	eqtl-a-ENSG00000023445	rs56391674	G	T	G	T	-0.460716	0.132552	0.0880731	0.0832548	FALSE	FALSE	FALSE	KIRC	102400569	0.0465693	0.0666022	outcome	TRUE	reported	380248	378749	1499	11	102271300	0.02064	2.28034207200044e-110	28107	NA	NA	eqtl-a-ENSG00000023445	TRUE	reported	eqtl-a-ENSG00000023445	rs56391674	2.28034207200044e-110	2	1	TRUE	-0.131982	498.249881354786	BIRC3	ENSG00000023445
454	eqtl-a-ENSG00000023445	rs61916464	T	C	T	C	-0.216682	-0.0636013	0.0648417	0.057599	FALSE	FALSE	FALSE	KIRC	101770787	0.412884	0.0776734	outcome	TRUE	reported	380248	378749	1499	11	101641518	0.024101	2.45866862928973e-19	30537	NA	NA	eqtl-a-ENSG00000023445	TRUE	reported	eqtl-a-ENSG00000023445	rs61916464	2.45866862928973e-19	2	1	TRUE	-0.0513824	80.8305521780866	BIRC3	ENSG00000023445
455	eqtl-a-ENSG00000023445	rs61918162	C	T	C	T	-0.0681117	-0.0668932	0.335064	0.334072	FALSE	FALSE	FALSE	KIRC	101684714	0.0878982	0.0391971	outcome	TRUE	reported	380248	378749	1499	11	101555445	0.0125963	6.39455018355698e-08	31564	NA	NA	eqtl-a-ENSG00000023445	TRUE	reported	eqtl-a-ENSG00000023445	rs61918162	6.39455018355698e-08	2	1	TRUE	-0.0304225	29.2386589138945	BIRC3	ENSG00000023445
456	eqtl-a-ENSG00000023445	rs61918360	T	C	T	C	-0.0650617	0.0286635	0.532729	0.534522	FALSE	FALSE	FALSE	KIRC	102129894	0.437753	0.0369378	outcome	TRUE	reported	380248	378749	1499	11	102000625	0.0119165	4.77210510078446e-08	31565	NA	NA	eqtl-a-ENSG00000023445	TRUE	reported	eqtl-a-ENSG00000023445	rs61918360	4.77210510078446e-08	2	1	TRUE	-0.0307173	29.809409900503	BIRC3	ENSG00000023445
457	eqtl-a-ENSG00000023445	rs61918373	C	G	C	G	-0.0617606	-0.0914458	0.325867	0.299134	FALSE	TRUE	FALSE	KIRC	101571047	0.0233615	0.0403294	outcome	TRUE	reported	380248	378749	1499	11	101441778	0.0126878	1.12849593752776e-06	25983	NA	NA	eqtl-a-ENSG00000023445	TRUE	reported	eqtl-a-ENSG00000023445	rs61918373	1.12849593752776e-06	2	1	TRUE	-0.0301856	23.694653635789	BIRC3	ENSG00000023445
458	eqtl-a-ENSG00000023445	rs724569	G	T	G	T	-0.0854809	0.00475976	0.32774	0.338016	FALSE	FALSE	FALSE	KIRC	101882452	0.902851	0.038995	outcome	TRUE	reported	380248	378749	1499	11	101753183	0.0126593	1.45411917037517e-11	31567	NA	NA	eqtl-a-ENSG00000023445	TRUE	reported	eqtl-a-ENSG00000023445	rs724569	1.45411917037517e-11	2	1	TRUE	-0.037979	45.5951646486839	BIRC3	ENSG00000023445
459	eqtl-a-ENSG00000023445	rs72978382	A	G	A	G	-0.200946	-0.148524	0.0570982	0.0261341	FALSE	FALSE	FALSE	KIRC	101637269	0.197571	0.115269	outcome	TRUE	reported	380248	378749	1499	11	101508000	0.0255949	4.1209751909733e-15	29384	NA	NA	eqtl-a-ENSG00000023445	TRUE	reported	eqtl-a-ENSG00000023445	rs72978382	4.1209751909733e-15	2	1	TRUE	-0.0457541	61.6384709935443	BIRC3	ENSG00000023445
460	eqtl-a-ENSG00000023445	rs72980379	C	A	C	A	-0.200431	-0.14832	0.0577152	0.0261386	FALSE	FALSE	FALSE	KIRC	101661011	0.198122	0.115252	outcome	TRUE	reported	380248	378749	1499	11	101531742	0.0254658	3.52939283746354e-15	29384	NA	NA	eqtl-a-ENSG00000023445	TRUE	reported	eqtl-a-ENSG00000023445	rs72980379	3.52939283746354e-15	2	1	TRUE	-0.045868	61.9462667969485	BIRC3	ENSG00000023445
461	eqtl-a-ENSG00000023445	rs72982116	T	C	T	C	-0.128388	0.0411578	0.0788381	0.0588022	FALSE	FALSE	FALSE	KIRC	102515155	0.594462	0.0773088	outcome	TRUE	reported	380248	378749	1499	11	102385886	0.0220591	5.87070151450846e-09	31566	NA	NA	eqtl-a-ENSG00000023445	TRUE	reported	eqtl-a-ENSG00000023445	rs72982116	5.87070151450846e-09	2	1	TRUE	-0.0327422	33.8745307786433	BIRC3	ENSG00000023445
462	eqtl-a-ENSG00000023445	rs75495275	T	C	T	C	-0.558226	0.122331	0.0653685	0.0693633	FALSE	FALSE	FALSE	KIRC	102435041	0.0921467	0.0726356	outcome	TRUE	reported	380248	378749	1499	11	102305772	0.0236162	1.58489319246112e-123	26362	NA	NA	eqtl-a-ENSG00000023445	TRUE	reported	eqtl-a-ENSG00000023445	rs75495275	1.58489319246112e-123	2	1	TRUE	-0.14407	558.727547779747	BIRC3	ENSG00000023445
463	eqtl-a-ENSG00000023445	rs75782833	C	T	C	T	-0.332109	-0.0953592	0.0232396	0.00913341	FALSE	FALSE	FALSE	KIRC	101517856	0.624967	0.195079	outcome	TRUE	reported	380248	378749	1499	11	101388587	0.0394045	3.50428968264438e-17	25213	NA	NA	eqtl-a-ENSG00000023445	TRUE	reported	eqtl-a-ENSG00000023445	rs75782833	3.50428968264438e-17	2	1	TRUE	-0.0530065	71.034552288328	BIRC3	ENSG00000023445
464	eqtl-a-ENSG00000023445	rs7665090	G	A	G	A	-0.0605752	-0.0148704	0.494318	0.468476	FALSE	FALSE	FALSE	KIRC	102630446	0.687144	0.0369237	outcome	TRUE	reported	380248	378749	1499	4	103551603	0.0118933	3.51698082096752e-07	31300	NA	NA	eqtl-a-ENSG00000023445	TRUE	reported	eqtl-a-ENSG00000023445	rs7665090	3.51698082096752e-07	2	1	TRUE	-0.0287776	25.9408955989365	BIRC3	ENSG00000023445
465	eqtl-a-ENSG00000023445	rs76754237	C	T	C	T	-0.151086	-0.101849	0.0647249	0.0502925	FALSE	FALSE	FALSE	KIRC	102673734	0.229389	0.0847374	outcome	TRUE	reported	380248	378749	1499	11	102544465	0.0241567	3.98538241316121e-10	30413	NA	NA	eqtl-a-ENSG00000023445	TRUE	reported	eqtl-a-ENSG00000023445	rs76754237	3.98538241316121e-10	2	1	TRUE	-0.035842	39.1176930988483	BIRC3	ENSG00000023445
466	eqtl-a-ENSG00000023445	rs76847558	A	G	A	G	-0.263494	-0.0545801	0.0134791	0.0110056	FALSE	FALSE	FALSE	KIRC	101949031	0.768776	0.185662	outcome	TRUE	reported	380248	378749	1499	11	101819762	0.0515655	3.221588008075e-07	1966	NA	NA	eqtl-a-ENSG00000023445	TRUE	reported	eqtl-a-ENSG00000023445	rs76847558	3.221588008075e-07	2	1	TRUE	-0.114544	26.1109693124507	BIRC3	ENSG00000023445
467	eqtl-a-ENSG00000023445	rs77095316	T	G	T	G	-0.148361	-0.100767	0.0634323	0.0502376	FALSE	FALSE	FALSE	KIRC	102701449	0.234609	0.0847798	outcome	TRUE	reported	380248	378749	1499	11	102572180	0.0243866	1.17370782501911e-09	31355	NA	NA	eqtl-a-ENSG00000023445	TRUE	reported	eqtl-a-ENSG00000023445	rs77095316	1.17370782501911e-09	2	1	TRUE	-0.0343378	37.011526223526	BIRC3	ENSG00000023445
468	eqtl-a-ENSG00000023445	rs77866977	C	T	C	T	-0.307421	0.00182029	0.0146836	0.0187867	FALSE	FALSE	FALSE	KIRC	102222829	0.989518	0.138555	outcome	TRUE	reported	380248	378749	1499	11	102093560	0.0494135	4.92742474318649e-10	24246	NA	NA	eqtl-a-ENSG00000023445	TRUE	reported	eqtl-a-ENSG00000023445	rs77866977	4.92742474318649e-10	2	1	TRUE	-0.0399245	38.7057804655405	BIRC3	ENSG00000023445
469	eqtl-a-ENSG00000023445	rs78196463	C	T	C	T	-0.486725	0.14815	0.0266725	0.0461197	FALSE	FALSE	FALSE	KIRC	102386113	0.09342	0.0883094	outcome	TRUE	reported	380248	378749	1499	11	102256844	0.0367109	4.03366660889926e-40	25583	NA	NA	eqtl-a-ENSG00000023445	TRUE	reported	eqtl-a-ENSG00000023445	rs78196463	4.03366660889926e-40	2	1	TRUE	-0.0826119	175.783150571136	BIRC3	ENSG00000023445
470	eqtl-a-ENSG00000023445	rs7926051	T	C	T	C	-0.1212	0.0207015	0.152863	0.208444	FALSE	FALSE	FALSE	KIRC	102031510	0.648628	0.0454312	outcome	TRUE	reported	380248	378749	1499	11	101902241	0.0165078	2.10426290842829e-13	30902	NA	NA	eqtl-a-ENSG00000023445	TRUE	reported	eqtl-a-ENSG00000023445	rs7926051	2.10426290842829e-13	2	1	TRUE	-0.0417307	53.9047259650067	BIRC3	ENSG00000023445
471	eqtl-a-ENSG00000023445	rs7931676	G	A	G	A	-0.0610719	-0.105052	0.310353	0.271136	FALSE	FALSE	FALSE	KIRC	101534487	0.0117509	0.0416948	outcome	TRUE	reported	380248	378749	1499	11	101405218	0.0128545	2.02409084240171e-06	31561	NA	NA	eqtl-a-ENSG00000023445	TRUE	reported	eqtl-a-ENSG00000023445	rs7931676	2.02409084240171e-06	2	1	TRUE	-0.0267343	22.5721270331605	BIRC3	ENSG00000023445
472	eqtl-a-ENSG00000023445	rs7949939	G	A	G	A	-0.0730615	-0.0589165	0.31175	0.315499	FALSE	FALSE	FALSE	KIRC	101720460	0.140424	0.0399647	outcome	TRUE	reported	380248	378749	1499	11	101591191	0.0128342	1.24971217256612e-08	31569	NA	NA	eqtl-a-ENSG00000023445	TRUE	reported	eqtl-a-ENSG00000023445	rs7949939	1.24971217256612e-08	2	1	TRUE	-0.0320243	32.4070547672888	BIRC3	ENSG00000023445
473	eqtl-a-ENSG00000023445	rs79866909	T	C	T	C	-0.324491	-0.0970568	0.0232797	0.00913591	FALSE	FALSE	FALSE	KIRC	101499334	0.618216	0.194744	outcome	TRUE	reported	380248	378749	1499	11	101370065	0.0393757	1.70765447281388e-16	25522	NA	NA	eqtl-a-ENSG00000023445	TRUE	reported	eqtl-a-ENSG00000023445	rs79866909	1.70765447281388e-16	2	1	TRUE	-0.0515178	67.9123465285534	BIRC3	ENSG00000023445
474	eqtl-a-ENSG00000025708	rs1053764	G	A	G	A	-0.697849	0.326961	0.0200924	0.0188245	FALSE	FALSE	FALSE	KIRC	50447066	0.00681648	0.120842	outcome	TRUE	reported	380248	378749	1499	22	50885495	0.042008	5.66761054941849e-62	15588	NA	NA	eqtl-a-ENSG00000025708	TRUE	reported	eqtl-a-ENSG00000025708	rs1053764	5.66761054941849e-62	2	1	TRUE	-0.131902	275.968117099971	TYMP	ENSG00000025708
475	eqtl-a-ENSG00000025708	rs112488066	T	C	T	C	-0.313728	-0.245423	0.0178171	0.00587041	FALSE	FALSE	FALSE	KIRC	50133697	0.27796	0.226215	outcome	TRUE	reported	380248	378749	1499	22	50572126	0.0449138	2.84446110744792e-12	18083	NA	NA	eqtl-a-ENSG00000025708	TRUE	reported	eqtl-a-ENSG00000025708	rs112488066	2.84446110744792e-12	2	1	TRUE	-0.0518773	48.7918134955337	TYMP	ENSG00000025708
476	eqtl-a-ENSG00000025708	rs112945019	A	G	A	G	-0.177381	-0.154695	0.0269554	0.013651	FALSE	FALSE	FALSE	KIRC	50108532	0.305147	0.150855	outcome	TRUE	reported	380248	378749	1499	22	50546961	0.0367195	1.35990947599689e-06	24308	NA	NA	eqtl-a-ENSG00000025708	TRUE	reported	eqtl-a-ENSG00000025708	rs112945019	1.35990947599689e-06	2	1	TRUE	-0.0309703	23.3356917877091	TYMP	ENSG00000025708
477	eqtl-a-ENSG00000025708	rs113111175	T	C	T	C	0.216961	0.104943	0.0789714	0.0954361	FALSE	FALSE	FALSE	KIRC	50429282	0.0934351	0.062557	outcome	TRUE	reported	380248	378749	1499	22	50867711	0.0219928	5.90336994639883e-23	24985	NA	NA	eqtl-a-ENSG00000025708	TRUE	reported	eqtl-a-ENSG00000025708	rs113111175	5.90336994639883e-23	2	1	TRUE	0.0622923352170226	97.320044351197	TYMP	ENSG00000025708
478	eqtl-a-ENSG00000025708	rs113471365	T	G	T	G	-0.179104	-0.145527	0.0260579	0.0135047	FALSE	FALSE	FALSE	KIRC	50120112	0.337023	0.151581	outcome	TRUE	reported	380248	378749	1499	22	50558541	0.0373297	1.6025810387663e-06	24174	NA	NA	eqtl-a-ENSG00000025708	TRUE	reported	eqtl-a-ENSG00000025708	rs113471365	1.6025810387663e-06	2	1	TRUE	-0.0308452	23.0198013198278	TYMP	ENSG00000025708
479	eqtl-a-ENSG00000025708	rs113872034	A	G	A	G	0.147578	0.043183	0.175849	0.196521	FALSE	FALSE	FALSE	KIRC	50241007	0.352779	0.0464728	outcome	TRUE	reported	380248	378749	1499	22	50679436	0.0155846	2.81449187981215e-21	18245	NA	NA	eqtl-a-ENSG00000025708	TRUE	reported	eqtl-a-ENSG00000025708	rs113872034	2.81449187981215e-21	2	1	TRUE	0.0699379806120877	89.6709809770299	TYMP	ENSG00000025708
480	eqtl-a-ENSG00000025708	rs115593502	A	G	A	G	-0.41271	-0.129056	0.0176448	0.0174076	FALSE	FALSE	FALSE	KIRC	50423215	0.353974	0.139232	outcome	TRUE	reported	380248	378749	1499	22	50861644	0.0450729	5.35549970840113e-20	23548	NA	NA	eqtl-a-ENSG00000025708	TRUE	reported	eqtl-a-ENSG00000025708	rs115593502	5.35549970840113e-20	2	1	TRUE	-0.0595661	83.8414886542685	TYMP	ENSG00000025708
481	eqtl-a-ENSG00000025708	rs115671526	A	G	A	G	-0.300172	-0.174315	0.0160618	0.0154456	FALSE	FALSE	FALSE	KIRC	50440216	0.237693	0.147628	outcome	TRUE	reported	380248	378749	1499	22	50878645	0.0472764	2.16157346297316e-10	13666	NA	NA	eqtl-a-ENSG00000025708	TRUE	reported	eqtl-a-ENSG00000025708	rs115671526	2.16157346297316e-10	2	1	TRUE	-0.0542372	40.3135979945725	TYMP	ENSG00000025708
482	eqtl-a-ENSG00000025708	rs115712102	T	C	T	C	-0.29448	-0.0045826	0.0139925	0.0185053	FALSE	FALSE	FALSE	KIRC	50733355	0.973162	0.136215	outcome	TRUE	reported	380248	378749	1499	22	51171783	0.0506101	5.93430686397617e-09	13543	NA	NA	eqtl-a-ENSG00000025708	TRUE	reported	eqtl-a-ENSG00000025708	rs115712102	5.93430686397617e-09	2	1	TRUE	-0.0499403	33.8561225477505	TYMP	ENSG00000025708
483	eqtl-a-ENSG00000025708	rs116289669	G	C	G	C	-0.353415	0.113076	0.0375393	0.0463513	FALSE	TRUE	FALSE	KIRC	50673104	0.194545	0.0871662	outcome	TRUE	reported	380248	378749	1499	22	51111532	0.0311703	8.48789503007242e-30	24933	NA	NA	eqtl-a-ENSG00000025708	TRUE	reported	eqtl-a-ENSG00000025708	rs116289669	8.48789503007242e-30	2	1	TRUE	-0.0716238	128.554709792839	TYMP	ENSG00000025708
484	eqtl-a-ENSG00000025708	rs117044665	C	T	C	T	-0.41715	-0.0969964	0.0164148	0.017809	FALSE	FALSE	FALSE	KIRC	50318936	0.483693	0.138492	outcome	TRUE	reported	380248	378749	1499	22	50757365	0.0467086	4.22182279051132e-19	19190	NA	NA	eqtl-a-ENSG00000025708	TRUE	reported	eqtl-a-ENSG00000025708	rs117044665	4.22182279051132e-19	2	1	TRUE	-0.0643398	79.7610376245534	TYMP	ENSG00000025708
485	eqtl-a-ENSG00000025708	rs117066889	A	G	A	G	-0.261202	-0.032281	0.0189849	0.0283115	FALSE	FALSE	FALSE	KIRC	50715713	0.773435	0.112132	outcome	TRUE	reported	380248	378749	1499	22	51154141	0.0435562	2.01001824711370e-09	2581	NA	NA	eqtl-a-ENSG00000025708	TRUE	reported	eqtl-a-ENSG00000025708	rs117066889	2.01001824711370e-09	2	1	TRUE	-0.117272	35.9627612065705	TYMP	ENSG00000025708
486	eqtl-a-ENSG00000025708	rs117165126	T	C	T	C	-0.232204	0.234632	0.0496685	0.0253557	FALSE	FALSE	FALSE	KIRC	50072376	0.0428825	0.115876	outcome	TRUE	reported	380248	378749	1499	22	50510805	0.0273249	1.92885686021562e-17	23916	NA	NA	eqtl-a-ENSG00000025708	TRUE	reported	eqtl-a-ENSG00000025708	rs117165126	1.92885686021562e-17	2	1	TRUE	-0.0548694	72.2141378972957	TYMP	ENSG00000025708
487	eqtl-a-ENSG00000025708	rs117265627	T	C	T	C	-0.464196	0.26617	0.0251007	0.0145147	FALSE	FALSE	FALSE	KIRC	50278051	0.0803952	0.152237	outcome	TRUE	reported	380248	378749	1499	22	50716480	0.037846	1.38931268173676e-34	19905	NA	NA	eqtl-a-ENSG00000025708	TRUE	reported	eqtl-a-ENSG00000025708	rs117265627	1.38931268173676e-34	2	1	TRUE	-0.0866138	150.439824299675	TYMP	ENSG00000025708
488	eqtl-a-ENSG00000025708	rs11912419	T	C	T	C	0.205065	-0.0452828	0.15711	0.193516	FALSE	FALSE	FALSE	KIRC	50188759	0.330532	0.0465373	outcome	TRUE	reported	380248	378749	1499	22	50627188	0.0162639	1.89801657187573e-36	25319	NA	NA	eqtl-a-ENSG00000025708	TRUE	reported	eqtl-a-ENSG00000025708	rs11912419	1.89801657187573e-36	2	1	TRUE	0.07899533130139	158.976779168217	TYMP	ENSG00000025708
489	eqtl-a-ENSG00000025708	rs12158353	G	T	G	T	-0.402898	-0.108264	0.0197615	0.0179072	FALSE	FALSE	FALSE	KIRC	50378437	0.432208	0.137842	outcome	TRUE	reported	380248	378749	1499	22	50816866	0.0426284	3.33656815138525e-21	24821	NA	NA	eqtl-a-ENSG00000025708	TRUE	reported	eqtl-a-ENSG00000025708	rs12158353	3.33656815138525e-21	2	1	TRUE	-0.0598858	89.3289354605009	TYMP	ENSG00000025708
490	eqtl-a-ENSG00000025708	rs12484539	A	G	A	G	-0.252396	-0.114702	0.0176074	0.0130955	FALSE	FALSE	FALSE	KIRC	50471349	0.485568	0.164476	outcome	TRUE	reported	380248	378749	1499	22	50909778	0.0452039	2.3559170759593e-08	11940	NA	NA	eqtl-a-ENSG00000025708	TRUE	reported	eqtl-a-ENSG00000025708	rs12484539	2.3559170759593e-08	2	1	TRUE	-0.0510357	31.1754782653319	TYMP	ENSG00000025708
491	eqtl-a-ENSG00000025708	rs131719	G	T	G	T	0.264638	-0.107903	0.520713	0.561409	FALSE	FALSE	FALSE	KIRC	50619476	0.00333426	0.0367628	outcome	TRUE	reported	380248	378749	1499	22	51057904	0.0117036	3.33426412763232e-113	25325	NA	NA	eqtl-a-ENSG00000025708	TRUE	reported	eqtl-a-ENSG00000025708	rs131719	3.33426412763232e-113	2	1	TRUE	0.14068068954297	511.287848121731	TYMP	ENSG00000025708
492	eqtl-a-ENSG00000025708	rs131734	G	A	G	A	0.368452	-0.0571736	0.364309	0.384985	FALSE	FALSE	FALSE	KIRC	50607388	0.131165	0.0378753	outcome	TRUE	reported	380248	378749	1499	22	51045816	0.0119725	1e-200	24773	NA	NA	eqtl-a-ENSG00000025708	TRUE	reported	eqtl-a-ENSG00000025708	rs131734	1e-200	2	1	TRUE	0.191900762422715	947.091949670106	TYMP	ENSG00000025708
493	eqtl-a-ENSG00000025708	rs131759	A	G	A	G	0.326479	-0.0259031	0.480538	0.513142	FALSE	FALSE	FALSE	KIRC	50577052	0.481474	0.0367977	outcome	TRUE	reported	380248	378749	1499	22	51015481	0.0115912	1.51705036745938e-174	16922	NA	NA	eqtl-a-ENSG00000025708	TRUE	reported	eqtl-a-ENSG00000025708	rs131759	1.51705036745938e-174	2	1	TRUE	0.211629764754228	793.329683365824	TYMP	ENSG00000025708
494	eqtl-a-ENSG00000025708	rs131788	C	T	C	T	0.49897	-0.0460942	0.76775	0.795342	FALSE	FALSE	FALSE	KIRC	50538325	0.310189	0.0454208	outcome	TRUE	reported	380248	378749	1499	22	50976754	0.0134545	1e-200	17293	NA	NA	eqtl-a-ENSG00000025708	TRUE	reported	eqtl-a-ENSG00000025708	rs131788	1e-200	2	1	TRUE	0.271442065090994	1375.35162164884	TYMP	ENSG00000025708
495	eqtl-a-ENSG00000025708	rs131801	T	G	T	G	0.626234	-0.100685	0.607898	0.631752	FALSE	FALSE	FALSE	KIRC	50528205	0.00720377	0.0374674	outcome	TRUE	reported	380248	378749	1499	22	50966634	0.0109923	1e-200	16802	NA	NA	eqtl-a-ENSG00000025708	TRUE	reported	eqtl-a-ENSG00000025708	rs131801	1e-200	2	1	TRUE	0.40238190986875	3245.60856541197	TYMP	ENSG00000025708
496	eqtl-a-ENSG00000025708	rs131817	G	A	G	A	-0.412996	0.111479	0.537076	0.431234	FALSE	FALSE	FALSE	KIRC	50517109	0.00246604	0.0368225	outcome	TRUE	reported	380248	378749	1499	22	50955538	0.011419	1e-200	16468	NA	NA	eqtl-a-ENSG00000025708	TRUE	reported	eqtl-a-ENSG00000025708	rs131817	1e-200	2	1	TRUE	-0.271284	1308.08373287696	TYMP	ENSG00000025708
497	eqtl-a-ENSG00000025708	rs131824	G	A	G	A	-0.409986	0.0901136	0.374664	0.317925	FALSE	FALSE	FALSE	KIRC	50506827	0.0230059	0.0396393	outcome	TRUE	reported	380248	378749	1499	22	50945256	0.0118019	1e-200	14311	NA	NA	eqtl-a-ENSG00000025708	TRUE	reported	eqtl-a-ENSG00000025708	rs131824	1e-200	2	1	TRUE	-0.278888	1206.79691945989	TYMP	ENSG00000025708
498	eqtl-a-ENSG00000025708	rs134774	G	A	G	A	-0.332628	0.00128475	0.933888	0.95533	FALSE	FALSE	FALSE	KIRC	50642332	0.988505	0.0891758	outcome	TRUE	reported	380248	378749	1499	22	51080760	0.0237887	1.99067333898718e-44	22543	NA	NA	eqtl-a-ENSG00000025708	TRUE	reported	eqtl-a-ENSG00000025708	rs134774	1.99067333898718e-44	2	1	TRUE	-0.0927313	195.513247801428	TYMP	ENSG00000025708
499	eqtl-a-ENSG00000025708	rs134970	C	T	C	T	0.417931	-0.0718697	0.601374	0.686244	FALSE	FALSE	FALSE	KIRC	50496653	0.0742096	0.040256	outcome	TRUE	reported	380248	378749	1499	22	50935082	0.0116358	1e-200	14198	NA	NA	eqtl-a-ENSG00000025708	TRUE	reported	eqtl-a-ENSG00000025708	rs134970	1e-200	2	1	TRUE	0.28862742021058	1290.08010117352	TYMP	ENSG00000025708
500	eqtl-a-ENSG00000025708	rs138740005	A	G	A	G	-0.206005	0.286312	0.0352595	0.0291238	FALSE	FALSE	FALSE	KIRC	49986547	0.00471194	0.10131	outcome	TRUE	reported	380248	378749	1499	22	50424976	0.0322235	1.62450106350963e-10	12038	NA	NA	eqtl-a-ENSG00000025708	TRUE	reported	eqtl-a-ENSG00000025708	rs138740005	1.62450106350963e-10	2	1	TRUE	-0.0581739	40.8705142721722	TYMP	ENSG00000025708
501	eqtl-a-ENSG00000025708	rs139455278	C	A	C	A	-0.240788	-0.219597	0.0135649	0.00892547	FALSE	FALSE	FALSE	KIRC	50348942	0.261999	0.195775	outcome	TRUE	reported	380248	378749	1499	22	50787371	0.051412	2.81877233215413e-06	3730	NA	NA	eqtl-a-ENSG00000025708	TRUE	reported	eqtl-a-ENSG00000025708	rs139455278	2.81877233215413e-06	2	1	TRUE	-0.0764819	21.9351536661325	TYMP	ENSG00000025708
502	eqtl-a-ENSG00000025708	rs139814298	A	G	A	G	-0.480393	0.313328	0.0243631	0.0145247	FALSE	FALSE	FALSE	KIRC	50330978	0.0426481	0.154567	outcome	TRUE	reported	380248	378749	1499	22	50769407	0.0383918	6.33869711256926e-36	19098	NA	NA	eqtl-a-ENSG00000025708	TRUE	reported	eqtl-a-ENSG00000025708	rs139814298	6.33869711256926e-36	2	1	TRUE	-0.0901807	156.572826622407	TYMP	ENSG00000025708
503	eqtl-a-ENSG00000025708	rs140228812	T	C	T	C	-0.410042	-0.100419	0.0173537	0.0178167	FALSE	FALSE	FALSE	KIRC	50331064	0.46787	0.138328	outcome	TRUE	reported	380248	378749	1499	22	50769493	0.0454466	1.83696127061899e-19	19189	NA	NA	eqtl-a-ENSG00000025708	TRUE	reported	eqtl-a-ENSG00000025708	rs140228812	1.83696127061899e-19	2	1	TRUE	-0.0649986	81.4055266985607	TYMP	ENSG00000025708
504	eqtl-a-ENSG00000025708	rs140284135	G	C	G	C	-0.415532	-0.102946	0.017518	0.0177306	FALSE	TRUE	FALSE	KIRC	50389846	0.456489	0.13825	outcome	TRUE	reported	380248	378749	1499	22	50828275	0.0452319	4.04669059465087e-20	23433	NA	NA	eqtl-a-ENSG00000025708	TRUE	reported	eqtl-a-ENSG00000025708	rs140284135	4.04669059465087e-20	2	1	TRUE	-0.0599078	84.3954992449455	TYMP	ENSG00000025708
505	eqtl-a-ENSG00000025708	rs140518	T	C	T	C	0.393158	-0.0410346	0.718536	0.760391	FALSE	FALSE	FALSE	KIRC	50560753	0.34008	0.0430128	outcome	TRUE	reported	380248	378749	1499	22	50999182	0.0128141	1e-200	17632	NA	NA	eqtl-a-ENSG00000025708	TRUE	reported	eqtl-a-ENSG00000025708	rs140518	1e-200	2	1	TRUE	0.22514229885773	941.364933623028	TYMP	ENSG00000025708
506	eqtl-a-ENSG00000025708	rs140519	T	G	T	G	0.39772	-0.0535264	0.494909	0.563358	FALSE	FALSE	FALSE	KIRC	50549633	0.151074	0.0372812	outcome	TRUE	reported	380248	378749	1499	22	50988062	0.0114237	1e-200	17662	NA	NA	eqtl-a-ENSG00000025708	TRUE	reported	eqtl-a-ENSG00000025708	rs140519	1e-200	2	1	TRUE	0.253431407616866	1212.10790200971	TYMP	ENSG00000025708
507	eqtl-a-ENSG00000025708	rs143078692	A	G	A	G	-0.758112	0.375915	0.0186661	0.0115287	FALSE	FALSE	FALSE	KIRC	50398426	0.0121975	0.149983	outcome	TRUE	reported	380248	378749	1499	22	50836855	0.0435099	5.42500321631142e-68	18858	NA	NA	eqtl-a-ENSG00000025708	TRUE	reported	eqtl-a-ENSG00000025708	rs143078692	5.42500321631142e-68	2	1	TRUE	-0.125879	303.592173787633	TYMP	ENSG00000025708
508	eqtl-a-ENSG00000025708	rs143148305	A	G	A	G	-0.234303	0.210908	0.0495675	0.0251601	FALSE	FALSE	FALSE	KIRC	50089863	0.0679376	0.11554	outcome	TRUE	reported	380248	378749	1499	22	50528292	0.0273501	1.06389801844699e-17	23834	NA	NA	eqtl-a-ENSG00000025708	TRUE	reported	eqtl-a-ENSG00000025708	rs143148305	1.06389801844699e-17	2	1	TRUE	-0.0554078	73.3901645526251	TYMP	ENSG00000025708
509	eqtl-a-ENSG00000025708	rs143561392	T	C	T	C	-0.401337	-0.12916	0.0173538	0.0174194	FALSE	FALSE	FALSE	KIRC	50412316	0.353382	0.139174	outcome	TRUE	reported	380248	378749	1499	22	50850745	0.045452	1.04688746554909e-18	22704	NA	NA	eqtl-a-ENSG00000025708	TRUE	reported	eqtl-a-ENSG00000025708	rs143561392	1.04688746554909e-18	2	1	TRUE	-0.0585032	77.9672836746622	TYMP	ENSG00000025708
510	eqtl-a-ENSG00000025708	rs143657796	T	C	T	C	0.258562	-0.0539628	0.0228709	0.0445412	FALSE	FALSE	FALSE	KIRC	49980768	0.556589	0.0917867	outcome	TRUE	reported	380248	378749	1499	22	50419197	0.0397537	7.82167920475605e-11	12291	NA	NA	eqtl-a-ENSG00000025708	TRUE	reported	eqtl-a-ENSG00000025708	rs143657796	7.82167920475605e-11	2	1	TRUE	0.0585710018248125	42.3033036655794	TYMP	ENSG00000025708
511	eqtl-a-ENSG00000025708	rs144480800	T	C	T	C	-0.287161	-0.259754	0.014775	0.00473014	FALSE	FALSE	FALSE	KIRC	50713214	0.328141	0.265634	outcome	TRUE	reported	380248	378749	1499	22	51151642	0.0492709	5.59615841602672e-09	5742	NA	NA	eqtl-a-ENSG00000025708	TRUE	reported	eqtl-a-ENSG00000025708	rs144480800	5.59615841602672e-09	2	1	TRUE	-0.0767004	33.9679958231702	TYMP	ENSG00000025708
512	eqtl-a-ENSG00000025708	rs144549712	A	G	A	G	-0.121953	0.160671	0.0962786	0.100369	FALSE	FALSE	FALSE	KIRC	50791427	0.00712672	0.0597099	outcome	TRUE	reported	380248	378749	1499	22	51229855	0.0201511	1.4306058611377e-09	7955	NA	NA	eqtl-a-ENSG00000025708	TRUE	reported	eqtl-a-ENSG00000025708	rs144549712	1.4306058611377e-09	2	1	TRUE	-0.0677065	36.6258287205649	TYMP	ENSG00000025708
513	eqtl-a-ENSG00000025708	rs144900791	A	G	A	G	0.294592	0.0297606	0.0245308	0.0288434	FALSE	FALSE	FALSE	KIRC	50389638	0.786772	0.110019	outcome	TRUE	reported	380248	378749	1499	22	50828067	0.0383953	1.68810711370492e-14	9804	NA	NA	eqtl-a-ENSG00000025708	TRUE	reported	eqtl-a-ENSG00000025708	rs144900791	1.68810711370492e-14	2	1	TRUE	0.0772654416908667	58.8688791735928	TYMP	ENSG00000025708
514	eqtl-a-ENSG00000025708	rs145121457	A	G	A	G	0.220013	-0.0757136	0.0158195	0.00676195	FALSE	FALSE	FALSE	KIRC	50630890	0.734176	0.222964	outcome	TRUE	reported	380248	378749	1499	22	51069318	0.0476632	3.91210047227874e-06	3856	NA	NA	eqtl-a-ENSG00000025708	TRUE	reported	eqtl-a-ENSG00000025708	rs145121457	3.91210047227874e-06	2	1	TRUE	0.0741501558230161	21.3073918491226	TYMP	ENSG00000025708
515	eqtl-a-ENSG00000025708	rs147532885	A	G	A	G	0.247632	-0.00527123	0.0159005	0.0101035	FALSE	FALSE	FALSE	KIRC	50178434	0.977797	0.189406	outcome	TRUE	reported	380248	378749	1499	22	50616863	0.0475339	1.89447989184279e-07	20320	NA	NA	eqtl-a-ENSG00000025708	TRUE	reported	eqtl-a-ENSG00000025708	rs147532885	1.89447989184279e-07	2	1	TRUE	0.0365235495439806	27.1397994506549	TYMP	ENSG00000025708
516	eqtl-a-ENSG00000025708	rs150519056	C	T	C	T	0.190477	0.0646709	0.0284909	0.0329236	FALSE	FALSE	FALSE	KIRC	50336392	0.533714	0.103915	outcome	TRUE	reported	380248	378749	1499	22	50774821	0.0357381	9.84283035644322e-08	19301	NA	NA	eqtl-a-ENSG00000025708	TRUE	reported	eqtl-a-ENSG00000025708	rs150519056	9.84283035644322e-08	2	1	TRUE	0.0383375441283502	28.4067902969053	TYMP	ENSG00000025708
517	eqtl-a-ENSG00000025708	rs181629058	A	G	A	G	-0.235451	-0.0783149	0.0237458	0.0214542	FALSE	FALSE	FALSE	KIRC	50758494	0.533351	0.125727	outcome	TRUE	reported	380248	378749	1499	22	51196922	0.0390401	1.62948362307593e-09	13241	NA	NA	eqtl-a-ENSG00000025708	TRUE	reported	eqtl-a-ENSG00000025708	rs181629058	1.62948362307593e-09	2	1	TRUE	-0.0523439	36.3730094765262	TYMP	ENSG00000025708
518	eqtl-a-ENSG00000025708	rs186429433	A	G	A	G	-0.260565	0.222286	0.0165165	0.0200288	FALSE	FALSE	FALSE	KIRC	50106981	0.098098	0.134381	outcome	TRUE	reported	380248	378749	1499	22	50545410	0.0466468	2.32359268186692e-08	3663	NA	NA	eqtl-a-ENSG00000025708	TRUE	reported	eqtl-a-ENSG00000025708	rs186429433	2.32359268186692e-08	2	1	TRUE	-0.0919288	31.2024320599584	TYMP	ENSG00000025708
519	eqtl-a-ENSG00000025708	rs192059871	G	A	G	A	-0.191785	0.213677	0.0210184	0.0378484	FALSE	FALSE	FALSE	KIRC	49736364	0.0280996	0.0973078	outcome	TRUE	reported	380248	378749	1499	22	50130012	0.04146	3.73164223664703e-06	14749	NA	NA	eqtl-a-ENSG00000025708	TRUE	reported	eqtl-a-ENSG00000025708	rs192059871	3.73164223664703e-06	2	1	TRUE	-0.0380644	21.3978765792659	TYMP	ENSG00000025708
520	eqtl-a-ENSG00000025708	rs192510078	T	G	T	G	-0.34138	0.147877	0.0194047	0.00730028	FALSE	FALSE	FALSE	KIRC	50560193	0.500577	0.219538	outcome	TRUE	reported	380248	378749	1499	22	50998622	0.0430508	2.19482551370072e-15	2654	NA	NA	eqtl-a-ENSG00000025708	TRUE	reported	eqtl-a-ENSG00000025708	rs192510078	2.19482551370072e-15	2	1	TRUE	-0.152188	62.880168333967	TYMP	ENSG00000025708
521	eqtl-a-ENSG00000025708	rs28500484	C	A	C	A	-0.402375	-0.106144	0.0167506	0.0178836	FALSE	FALSE	FALSE	KIRC	50361255	0.441788	0.137997	outcome	TRUE	reported	380248	378749	1499	22	50799684	0.0462526	3.33042762308747e-18	23432	NA	NA	eqtl-a-ENSG00000025708	TRUE	reported	eqtl-a-ENSG00000025708	rs28500484	3.33042762308747e-18	2	1	TRUE	-0.0567425	75.6814907067363	TYMP	ENSG00000025708
522	eqtl-a-ENSG00000025708	rs34353679	T	C	T	C	0.184017	-0.0789222	0.0224102	0.0188716	FALSE	FALSE	FALSE	KIRC	50182154	0.562628	0.136321	outcome	TRUE	reported	380248	378749	1499	22	50620583	0.040181	4.65864910390172e-06	8532	NA	NA	eqtl-a-ENSG00000025708	TRUE	reported	eqtl-a-ENSG00000025708	rs34353679	4.65864910390172e-06	2	1	TRUE	0.0495255629305617	20.9736690269492	TYMP	ENSG00000025708
523	eqtl-a-ENSG00000025708	rs3865764	A	G	A	G	-0.25937	0.0772111	0.952788	0.963203	FALSE	FALSE	FALSE	KIRC	50747420	0.442846	0.100614	outcome	TRUE	reported	380248	378749	1499	22	51185848	0.0279771	1.85097264293164e-20	11944	NA	NA	eqtl-a-ENSG00000025708	TRUE	reported	eqtl-a-ENSG00000025708	rs3865764	1.85097264293164e-20	2	1	TRUE	-0.084532	85.9476672406291	TYMP	ENSG00000025708
524	eqtl-a-ENSG00000025708	rs3888396	C	T	C	T	-0.145593	0.16983	0.112486	0.0980399	FALSE	FALSE	FALSE	KIRC	50772964	0.00474024	0.0601342	outcome	TRUE	reported	380248	378749	1499	22	51211392	0.0187969	9.49729657362424e-15	14899	NA	NA	eqtl-a-ENSG00000025708	TRUE	reported	eqtl-a-ENSG00000025708	rs3888396	9.49729657362424e-15	2	1	TRUE	-0.0633333	59.9940979643375	TYMP	ENSG00000025708
525	eqtl-a-ENSG00000025708	rs45515701	G	A	G	A	-0.40379	0.196312	0.0536889	0.0269782	FALSE	FALSE	FALSE	KIRC	50476893	0.0845766	0.113822	outcome	TRUE	reported	380248	378749	1499	22	50915322	0.0261853	1.18987132916004e-53	21066	NA	NA	eqtl-a-ENSG00000025708	TRUE	reported	eqtl-a-ENSG00000025708	rs45515701	1.18987132916004e-53	2	1	TRUE	-0.105655	237.791327165026	TYMP	ENSG00000025708
526	eqtl-a-ENSG00000025708	rs4824148	G	A	G	A	0.089956	0.0112241	0.58773	0.556936	FALSE	FALSE	FALSE	KIRC	50457956	0.762321	0.0371125	outcome	TRUE	reported	380248	378749	1499	22	50896385	0.0120673	9.01363567078142e-14	17545	NA	NA	eqtl-a-ENSG00000025708	TRUE	reported	eqtl-a-ENSG00000025708	rs4824148	9.01363567078142e-14	2	1	TRUE	0.0561928858896916	55.569955908136	TYMP	ENSG00000025708
527	eqtl-a-ENSG00000025708	rs4838801	T	C	T	C	0.0980906	0.0937714	0.140139	0.120462	FALSE	FALSE	FALSE	KIRC	50108960	0.0986143	0.0567759	outcome	TRUE	reported	380248	378749	1499	22	50547389	0.0171257	1.01859138805412e-08	25325	NA	NA	eqtl-a-ENSG00000025708	TRUE	reported	eqtl-a-ENSG00000025708	rs4838801	1.01859138805412e-08	2	1	TRUE	0.0359699923768622	32.8063654227251	TYMP	ENSG00000025708
528	eqtl-a-ENSG00000025708	rs56235139	A	G	A	G	-0.331094	0.0886152	0.0280605	0.0562147	FALSE	FALSE	FALSE	KIRC	50490447	0.267995	0.0799998	outcome	TRUE	reported	380248	378749	1499	22	50928876	0.0359315	3.12464008580612e-20	13738	NA	NA	eqtl-a-ENSG00000025708	TRUE	reported	eqtl-a-ENSG00000025708	rs56235139	3.12464008580612e-20	2	1	TRUE	-0.0783804	84.9086480521523	TYMP	ENSG00000025708
529	eqtl-a-ENSG00000025708	rs56269507	A	G	A	G	-0.231104	-0.0696411	0.0200499	0.0165227	FALSE	FALSE	FALSE	KIRC	50443909	0.631822	0.145339	outcome	TRUE	reported	380248	378749	1499	22	50882338	0.0424161	5.07679935991138e-08	9811	NA	NA	eqtl-a-ENSG00000025708	TRUE	reported	eqtl-a-ENSG00000025708	rs56269507	5.07679935991138e-08	2	1	TRUE	-0.0549298	29.6861212027772	TYMP	ENSG00000025708
530	eqtl-a-ENSG00000025708	rs5770957	C	T	C	T	-0.278191	0.0140963	0.684591	0.654559	FALSE	FALSE	FALSE	KIRC	50631857	0.715911	0.0387336	outcome	TRUE	reported	380248	378749	1499	22	51070285	0.0125925	3.79314984973676e-108	25440	NA	NA	eqtl-a-ENSG00000025708	TRUE	reported	eqtl-a-ENSG00000025708	rs5770957	3.79314984973676e-108	2	1	TRUE	-0.137203	488.04765706415	TYMP	ENSG00000025708
531	eqtl-a-ENSG00000025708	rs59650998	A	C	A	C	-0.310385	0.0297225	0.0607157	0.0693566	FALSE	FALSE	FALSE	KIRC	50144439	0.682774	0.072728	outcome	TRUE	reported	380248	378749	1499	22	50582868	0.0247854	5.58856105553948e-36	22169	NA	NA	eqtl-a-ENSG00000025708	TRUE	reported	eqtl-a-ENSG00000025708	rs59650998	5.58856105553948e-36	2	1	TRUE	-0.0838148	156.822937850052	TYMP	ENSG00000025708
532	eqtl-a-ENSG00000025708	rs6010011	G	A	G	A	-0.211455	-0.0132723	0.30517	0.310112	FALSE	FALSE	FALSE	KIRC	50564122	0.740043	0.0400014	outcome	TRUE	reported	380248	378749	1499	22	51002551	0.012802	2.74094297381807e-61	18315	NA	NA	eqtl-a-ENSG00000025708	TRUE	reported	eqtl-a-ENSG00000025708	rs6010011	2.74094297381807e-61	2	1	TRUE	-0.121157	272.822555046945	TYMP	ENSG00000025708
533	eqtl-a-ENSG00000025708	rs6010078	C	A	C	A	-0.166131	0.0796015	0.950488	0.963623	FALSE	FALSE	FALSE	KIRC	50759324	0.434877	0.101939	outcome	TRUE	reported	380248	378749	1499	22	51197752	0.0273999	1.33441218803676e-09	7784	NA	NA	eqtl-a-ENSG00000025708	TRUE	reported	eqtl-a-ENSG00000025708	rs6010078	1.33441218803676e-09	2	1	TRUE	-0.0685698	36.762361631379	TYMP	ENSG00000025708
534	eqtl-a-ENSG00000025708	rs62241110	T	C	T	C	0.108485	0.0611343	0.14303	0.13688	FALSE	FALSE	FALSE	KIRC	50119211	0.255575	0.0537723	outcome	TRUE	reported	380248	378749	1499	22	50557640	0.0169754	1.6523802673098e-10	22554	NA	NA	eqtl-a-ENSG00000025708	TRUE	reported	eqtl-a-ENSG00000025708	rs62241110	1.6523802673098e-10	2	1	TRUE	0.042517160356387	40.8412808192655	TYMP	ENSG00000025708
535	eqtl-a-ENSG00000025708	rs62241209	A	G	A	G	-0.138532	0.129669	0.132707	0.120322	FALSE	FALSE	FALSE	KIRC	50295963	0.0215784	0.0564341	outcome	TRUE	reported	380248	378749	1499	22	50734392	0.0175047	2.4882843036797e-15	21066	NA	NA	eqtl-a-ENSG00000025708	TRUE	reported	eqtl-a-ENSG00000025708	rs62241209	2.4882843036797e-15	2	1	TRUE	-0.0544478	62.6312189549658	TYMP	ENSG00000025708
536	eqtl-a-ENSG00000025708	rs73187254	T	C	T	C	0.18987	0.0270042	0.159369	0.194083	FALSE	FALSE	FALSE	KIRC	50203930	0.561866	0.0465532	outcome	TRUE	reported	380248	378749	1499	22	50642359	0.016182	8.61390345772425e-32	25321	NA	NA	eqtl-a-ENSG00000025708	TRUE	reported	eqtl-a-ENSG00000025708	rs73187254	8.61390345772425e-32	2	1	TRUE	0.0735399504412171	137.672851321777	TYMP	ENSG00000025708
537	eqtl-a-ENSG00000025708	rs73187272	A	G	A	G	0.174922	-0.0036997	0.136413	0.142372	FALSE	FALSE	FALSE	KIRC	50229136	0.944093	0.0527575	outcome	TRUE	reported	380248	378749	1499	22	50667565	0.0172779	4.32414252509864e-24	25315	NA	NA	eqtl-a-ENSG00000025708	TRUE	reported	eqtl-a-ENSG00000025708	rs73187272	4.32414252509864e-24	2	1	TRUE	0.0635044535447084	102.496009296645	TYMP	ENSG00000025708
538	eqtl-a-ENSG00000025708	rs73188911	T	C	T	C	0.261167	-0.0587537	0.071644	0.0906609	FALSE	FALSE	FALSE	KIRC	50308277	0.363014	0.0645902	outcome	TRUE	reported	380248	378749	1499	22	50746706	0.022973	6.02143496387027e-30	16696	NA	NA	eqtl-a-ENSG00000025708	TRUE	reported	eqtl-a-ENSG00000025708	rs73188911	6.02143496387027e-30	2	1	TRUE	0.0876487549385397	129.241257682732	TYMP	ENSG00000025708
539	eqtl-a-ENSG00000025708	rs739365	T	C	T	C	-0.116561	0.00540404	0.328707	0.445567	FALSE	FALSE	FALSE	KIRC	50701888	0.884276	0.0371282	outcome	TRUE	reported	380248	378749	1499	22	51140316	0.0126322	2.7726815976124e-20	25111	NA	NA	eqtl-a-ENSG00000025708	TRUE	reported	eqtl-a-ENSG00000025708	rs739365	2.7726815976124e-20	2	1	TRUE	-0.0581332	85.1429	TYMP	ENSG00000025708
540	eqtl-a-ENSG00000025708	rs74676574	T	C	T	C	-0.190338	0.11629	0.0220266	0.0278338	FALSE	FALSE	FALSE	KIRC	50471000	0.302703	0.112831	outcome	TRUE	reported	380248	378749	1499	22	50909429	0.0405199	2.63238859183548e-06	18241	NA	NA	eqtl-a-ENSG00000025708	TRUE	reported	eqtl-a-ENSG00000025708	rs74676574	2.63238859183548e-06	2	1	TRUE	-0.0347611	22.0655254292893	TYMP	ENSG00000025708
541	eqtl-a-ENSG00000025708	rs75152548	C	T	C	T	-0.122227	0.187702	0.124716	0.100971	FALSE	FALSE	FALSE	KIRC	50061834	0.00104337	0.0572514	outcome	TRUE	reported	380248	378749	1499	22	50500263	0.0179845	1.07398941234125e-11	25324	NA	NA	eqtl-a-ENSG00000025708	TRUE	reported	eqtl-a-ENSG00000025708	rs75152548	1.07398941234125e-11	2	1	TRUE	-0.0426701	46.1888945533298	TYMP	ENSG00000025708
542	eqtl-a-ENSG00000025708	rs75549088	A	G	A	G	-0.148364	0.204014	0.0374647	0.0109365	FALSE	FALSE	FALSE	KIRC	50174885	0.238088	0.172925	outcome	TRUE	reported	380248	378749	1499	22	50613314	0.031317	2.16261892915163e-06	18884	NA	NA	eqtl-a-ENSG00000025708	TRUE	reported	eqtl-a-ENSG00000025708	rs75549088	2.16261892915163e-06	2	1	TRUE	-0.0344561	22.4438192665769	TYMP	ENSG00000025708
543	eqtl-a-ENSG00000025708	rs760755	G	T	G	T	0.216609	-0.0582284	0.899747	0.909165	FALSE	FALSE	FALSE	KIRC	50162890	0.370696	0.0650473	outcome	TRUE	reported	380248	378749	1499	22	50601319	0.0197328	4.91926252434165e-28	24658	NA	NA	eqtl-a-ENSG00000025708	TRUE	reported	eqtl-a-ENSG00000025708	rs760755	4.91926252434165e-28	2	1	TRUE	0.0697377341843412	120.496814662019	TYMP	ENSG00000025708
544	eqtl-a-ENSG00000025708	rs77189570	G	A	G	A	-0.196614	0.0131609	0.0322311	0.0237726	FALSE	FALSE	FALSE	KIRC	50713908	0.913563	0.121247	outcome	TRUE	reported	380248	378749	1499	22	51152336	0.0336587	5.17642588198788e-09	16540	NA	NA	eqtl-a-ENSG00000025708	TRUE	reported	eqtl-a-ENSG00000025708	rs77189570	5.17642588198788e-09	2	1	TRUE	-0.0453762	34.1219781942468	TYMP	ENSG00000025708
545	eqtl-a-ENSG00000025708	rs77551271	A	G	A	G	-0.421139	0.268246	0.0278749	0.0150306	FALSE	FALSE	FALSE	KIRC	50260735	0.0752922	0.150812	outcome	TRUE	reported	380248	378749	1499	22	50699164	0.0359815	1.21004076085695e-31	22674	NA	NA	eqtl-a-ENSG00000025708	TRUE	reported	eqtl-a-ENSG00000025708	rs77551271	1.21004076085695e-31	2	1	TRUE	-0.0774985	136.991113116097	TYMP	ENSG00000025708
546	eqtl-a-ENSG00000025708	rs77633392	T	C	T	C	0.277109	-0.056913	0.0213779	0.0444447	FALSE	FALSE	FALSE	KIRC	50005970	0.534284	0.0915767	outcome	TRUE	reported	380248	378749	1499	22	50444399	0.0410824	1.52826969040979e-11	12603	NA	NA	eqtl-a-ENSG00000025708	TRUE	reported	eqtl-a-ENSG00000025708	rs77633392	1.52826969040979e-11	2	1	TRUE	0.0599804457954684	45.4977215688836	TYMP	ENSG00000025708
547	eqtl-a-ENSG00000025708	rs78225146	G	A	G	A	0.202498	0.0879314	0.0266862	0.0176438	FALSE	FALSE	FALSE	KIRC	50382242	0.527975	0.13933	outcome	TRUE	reported	380248	378749	1499	22	50820671	0.0368903	4.042220497642e-08	17192	NA	NA	eqtl-a-ENSG00000025708	TRUE	reported	eqtl-a-ENSG00000025708	rs78225146	4.042220497642e-08	2	1	TRUE	0.0418302367485815	30.1312467764399	TYMP	ENSG00000025708
548	eqtl-a-ENSG00000025708	rs79183605	A	G	A	G	0.13413	-0.00992106	0.0542637	0.0634377	FALSE	FALSE	FALSE	KIRC	50719103	0.894606	0.0748879	outcome	TRUE	reported	380248	378749	1499	22	51157531	0.0262484	3.221588008075e-07	24987	NA	NA	eqtl-a-ENSG00000025708	TRUE	reported	eqtl-a-ENSG00000025708	rs79183605	3.221588008075e-07	2	1	TRUE	0.0323114602333866	26.1123632060396	TYMP	ENSG00000025708
549	eqtl-a-ENSG00000025708	rs79225508	C	T	C	T	-0.215426	0.278783	0.0332181	0.0275733	FALSE	FALSE	FALSE	KIRC	50031424	0.00683754	0.103075	outcome	TRUE	reported	380248	378749	1499	22	50469853	0.0331623	8.23758672761877e-11	13378	NA	NA	eqtl-a-ENSG00000025708	TRUE	reported	eqtl-a-ENSG00000025708	rs79225508	8.23758672761877e-11	2	1	TRUE	-0.0560798	42.1994652486661	TYMP	ENSG00000025708
550	eqtl-a-ENSG00000025708	rs79547416	T	C	T	C	-0.412093	-0.103413	0.0178528	0.0178504	FALSE	FALSE	FALSE	KIRC	50347318	0.454586	0.138291	outcome	TRUE	reported	380248	378749	1499	22	50785747	0.0448132	3.72220253017849e-20	20781	NA	NA	eqtl-a-ENSG00000025708	TRUE	reported	eqtl-a-ENSG00000025708	rs79547416	3.72220253017849e-20	2	1	TRUE	-0.0636642	84.5626454792846	TYMP	ENSG00000025708
551	eqtl-a-ENSG00000025708	rs79865452	G	A	G	A	-0.644829	0.440798	0.0191722	0.0115769	FALSE	FALSE	FALSE	KIRC	50357191	0.0101181	0.171399	outcome	TRUE	reported	380248	378749	1499	22	50795620	0.0430615	1.07621737688879e-50	17520	NA	NA	eqtl-a-ENSG00000025708	TRUE	reported	eqtl-a-ENSG00000025708	rs79865452	1.07621737688879e-50	2	1	TRUE	-0.112422	224.238827450141	TYMP	ENSG00000025708
552	eqtl-a-ENSG00000025708	rs80055960	T	C	T	C	-0.364964	0.100499	0.0380083	0.0450566	FALSE	FALSE	FALSE	KIRC	50660435	0.255442	0.0883719	outcome	TRUE	reported	380248	378749	1499	22	51098863	0.0309738	4.76540701725134e-32	24991	NA	NA	eqtl-a-ENSG00000025708	TRUE	reported	eqtl-a-ENSG00000025708	rs80055960	4.76540701725134e-32	2	1	TRUE	-0.0743324	138.838871857326	TYMP	ENSG00000025708
553	eqtl-a-ENSG00000025708	rs80299307	A	C	A	C	0.247322	0.00423795	0.0192054	0.0139768	FALSE	FALSE	FALSE	KIRC	50348688	0.978722	0.158898	outcome	TRUE	reported	380248	378749	1499	22	50787117	0.0433154	1.1310973893337e-08	18979	NA	NA	eqtl-a-ENSG00000025708	TRUE	reported	eqtl-a-ENSG00000025708	rs80299307	1.1310973893337e-08	2	1	TRUE	0.0414127348090305	32.601744615141	TYMP	ENSG00000025708
554	eqtl-a-ENSG00000025708	rs8138121	C	T	C	T	0.0681907	0.0238222	0.437906	0.495103	FALSE	FALSE	FALSE	KIRC	50045421	0.51853	0.0368986	outcome	TRUE	reported	380248	378749	1499	22	50483850	0.0119826	1.26450339588262e-08	17332	NA	NA	eqtl-a-ENSG00000025708	TRUE	reported	eqtl-a-ENSG00000025708	rs8138121	1.26450339588262e-08	2	1	TRUE	0.0431886263831057	32.3853185453855	TYMP	ENSG00000025708
555	eqtl-a-ENSG00000025708	rs909687	C	G	C	G	-0.120002	-0.0578201	0.589159	0.618457	FALSE	TRUE	FALSE	KIRC	50215466	0.128623	0.0380507	outcome	TRUE	reported	380248	378749	1499	22	50653895	0.0120551	2.41268153259164e-23	18567	NA	NA	eqtl-a-ENSG00000025708	TRUE	reported	eqtl-a-ENSG00000025708	rs909687	2.41268153259164e-23	2	1	TRUE	-0.0728642	99.091256144651	TYMP	ENSG00000025708
556	eqtl-a-ENSG00000025708	rs9616818	C	T	C	T	-0.0749933	0.0501699	0.763728	0.818493	FALSE	FALSE	FALSE	KIRC	50697117	0.295632	0.0479706	outcome	TRUE	reported	380248	378749	1499	22	51135545	0.0139968	8.42403184645453e-08	20620	NA	NA	eqtl-a-ENSG00000025708	TRUE	reported	eqtl-a-ENSG00000025708	rs9616818	8.42403184645453e-08	2	1	TRUE	-0.0372879	28.7069739581492	TYMP	ENSG00000025708
557	eqtl-a-ENSG00000025708	rs9616933	T	G	T	G	0.164418	0.0315522	0.0794621	0.0553911	FALSE	FALSE	FALSE	KIRC	50683133	0.694751	0.080405	outcome	TRUE	reported	380248	378749	1499	22	51121561	0.0219626	7.08924523563398e-14	23917	NA	NA	eqtl-a-ENSG00000025708	TRUE	reported	eqtl-a-ENSG00000025708	rs9616933	7.08924523563398e-14	2	1	TRUE	0.0483528561162551	56.0442702119367	TYMP	ENSG00000025708
558	eqtl-a-ENSG00000025708	rs9617038	G	A	G	A	0.0946538	0.0930428	0.137899	0.120684	FALSE	FALSE	FALSE	KIRC	50133468	0.101204	0.0567665	outcome	TRUE	reported	380248	378749	1499	22	50571897	0.0172433	4.03756939721413e-08	21066	NA	NA	eqtl-a-ENSG00000025708	TRUE	reported	eqtl-a-ENSG00000025708	rs9617038	4.03756939721413e-08	2	1	TRUE	0.0377952162776243	30.1325121006969	TYMP	ENSG00000025708
559	eqtl-a-ENSG00000026025	rs10774624	A	G	A	G	0.0882755	-0.0412571	0.538565	0.598278	FALSE	FALSE	FALSE	KIRC	111395984	0.274911	0.0377873	outcome	TRUE	reported	380248	378749	1499	12	111833788	0.0119159	1.28233058265602e-13	11496	NA	NA	eqtl-a-ENSG00000026025	TRUE	reported	eqtl-a-ENSG00000026025	rs10774624	1.28233058265602e-13	2	1	TRUE	0.0689355701632056	54.8815884114749	VIM	ENSG00000026025
560	eqtl-a-ENSG00000026025	rs10904907	C	T	C	T	0.127849	-0.000117404	0.198636	0.1817	FALSE	FALSE	FALSE	KIRC	17207364	0.998058	0.0482418	outcome	TRUE	reported	380248	378749	1499	10	17249363	0.0148788	8.50158693187438e-18	14263	NA	NA	eqtl-a-ENSG00000026025	TRUE	reported	eqtl-a-ENSG00000026025	rs10904907	8.50158693187438e-18	2	1	TRUE	0.071768371046996	73.8344184905389	VIM	ENSG00000026025
561	eqtl-a-ENSG00000026025	rs11065979	T	C	T	C	-0.0817298	0.0361541	0.418831	0.384671	FALSE	FALSE	FALSE	KIRC	111621753	0.341257	0.0379896	outcome	TRUE	reported	380248	378749	1499	12	112059557	0.0120439	1.15292219525677e-11	11496	NA	NA	eqtl-a-ENSG00000026025	TRUE	reported	eqtl-a-ENSG00000026025	rs11065979	1.15292219525677e-11	2	1	TRUE	-0.0631698	46.0496772271874	VIM	ENSG00000026025
562	eqtl-a-ENSG00000026025	rs11065987	G	A	G	A	-0.0717939	0.0378089	0.380678	0.382674	FALSE	FALSE	FALSE	KIRC	111634620	0.320179	0.0380337	outcome	TRUE	reported	380248	378749	1499	12	112072424	0.0122428	4.51304849229636e-09	14263	NA	NA	eqtl-a-ENSG00000026025	TRUE	reported	eqtl-a-ENSG00000026025	rs11065987	4.51304849229636e-09	2	1	TRUE	-0.0490466	34.3885276520553	VIM	ENSG00000026025
563	eqtl-a-ENSG00000026025	rs11066301	G	A	G	A	-0.073374	0.0495781	0.400736	0.397441	FALSE	FALSE	FALSE	KIRC	112433568	0.188564	0.0377066	outcome	TRUE	reported	380248	378749	1499	12	112871372	0.0121295	1.45569369177565e-09	14263	NA	NA	eqtl-a-ENSG00000026025	TRUE	reported	eqtl-a-ENSG00000026025	rs11066301	1.45569369177565e-09	2	1	TRUE	-0.0505904	36.5930486542255	VIM	ENSG00000026025
564	eqtl-a-ENSG00000026025	rs11254284	A	G	A	G	-0.164529	0.067509	0.640364	0.674309	FALSE	FALSE	FALSE	KIRC	16936430	0.0875165	0.0395102	outcome	TRUE	reported	380248	378749	1499	10	16978429	0.0123247	1.19398810446427e-40	13925	NA	NA	eqtl-a-ENSG00000026025	TRUE	reported	eqtl-a-ENSG00000026025	rs11254284	1.19398810446427e-40	2	1	TRUE	-0.112419	178.210054356533	VIM	ENSG00000026025
565	eqtl-a-ENSG00000026025	rs11254375	G	T	G	T	-0.0742639	0.0290829	0.307885	0.300919	FALSE	FALSE	FALSE	KIRC	17117193	0.471034	0.0403482	outcome	TRUE	reported	380248	378749	1499	10	17159192	0.0128781	8.07904449506562e-09	14263	NA	NA	eqtl-a-ENSG00000026025	TRUE	reported	eqtl-a-ENSG00000026025	rs11254375	8.07904449506562e-09	2	1	TRUE	-0.0482331	33.2546146043389	VIM	ENSG00000026025
566	eqtl-a-ENSG00000026025	rs11254387	C	G	C	G	-0.110704	-0.0359577	0.129674	0.172399	FALSE	TRUE	FALSE	KIRC	17131089	0.460477	0.048719	outcome	TRUE	reported	380248	378749	1499	10	17173088	0.0176919	3.91453337340726e-10	14252	NA	NA	eqtl-a-ENSG00000026025	TRUE	reported	eqtl-a-ENSG00000026025	rs11254387	3.91453337340726e-10	2	1	TRUE	-0.0523463	39.1541386728591	VIM	ENSG00000026025
567	eqtl-a-ENSG00000026025	rs11254427	A	G	A	G	-0.102988	-0.0394648	0.150555	0.180095	FALSE	FALSE	FALSE	KIRC	17177850	0.409663	0.0478659	outcome	TRUE	reported	380248	378749	1499	10	17219849	0.0166203	5.76965705877341e-10	14261	NA	NA	eqtl-a-ENSG00000026025	TRUE	reported	eqtl-a-ENSG00000026025	rs11254427	5.76965705877341e-10	2	1	TRUE	-0.0518226	38.3968441861547	VIM	ENSG00000026025
568	eqtl-a-ENSG00000026025	rs12261966	T	C	T	C	-0.0776027	0.0281333	0.306438	0.294892	FALSE	FALSE	FALSE	KIRC	17101001	0.487283	0.0405008	outcome	TRUE	reported	380248	378749	1499	10	17143000	0.0128936	1.75711424659509e-09	14263	NA	NA	eqtl-a-ENSG00000026025	TRUE	reported	eqtl-a-ENSG00000026025	rs12261966	1.75711424659509e-09	2	1	TRUE	-0.0503358	36.2247400553006	VIM	ENSG00000026025
569	eqtl-a-ENSG00000026025	rs1265564	C	A	C	A	-0.0663496	0.02766	0.421923	0.392268	FALSE	FALSE	FALSE	KIRC	111270654	0.470353	0.0383154	outcome	TRUE	reported	380248	378749	1499	12	111708458	0.0120384	3.55590377357159e-08	14263	NA	NA	eqtl-a-ENSG00000026025	TRUE	reported	eqtl-a-ENSG00000026025	rs1265564	3.55590377357159e-08	2	1	TRUE	-0.0461034	30.376594158837	VIM	ENSG00000026025
570	eqtl-a-ENSG00000026025	rs1276709	A	G	A	G	0.123039	-0.0529625	0.528834	0.476455	FALSE	FALSE	FALSE	KIRC	16996139	0.151934	0.036966	outcome	TRUE	reported	380248	378749	1499	10	17038138	0.0118783	3.83354000759044e-25	13925	NA	NA	eqtl-a-ENSG00000026025	TRUE	reported	eqtl-a-ENSG00000026025	rs1276709	3.83354000759044e-25	2	1	TRUE	0.0874490530917066	107.294387802204	VIM	ENSG00000026025
571	eqtl-a-ENSG00000026025	rs12770606	C	A	C	A	0.190457	0.00949133	0.0807493	0.0891008	FALSE	FALSE	FALSE	KIRC	17146185	0.883548	0.064799	outcome	TRUE	reported	380248	378749	1499	10	17188184	0.0217864	2.29034022172212e-18	14263	NA	NA	eqtl-a-ENSG00000026025	TRUE	reported	eqtl-a-ENSG00000026025	rs12770606	2.29034022172212e-18	2	1	TRUE	0.0730089193081351	76.4227976937122	VIM	ENSG00000026025
572	eqtl-a-ENSG00000026025	rs1375493	A	G	A	G	0.0761151	0.0422184	0.565077	0.613271	FALSE	FALSE	FALSE	KIRC	181459039	0.264137	0.0378075	outcome	TRUE	reported	380248	378749	1499	2	182323766	0.0119885	2.16441233343172e-10	14263	NA	NA	eqtl-a-ENSG00000026025	TRUE	reported	eqtl-a-ENSG00000026025	rs1375493	2.16441233343172e-10	2	1	TRUE	0.0530906528130511	40.3099212172144	VIM	ENSG00000026025
573	eqtl-a-ENSG00000026025	rs1543092	A	G	A	G	0.165385	-0.0414422	0.380576	0.33156	FALSE	FALSE	FALSE	KIRC	16983379	0.291557	0.0392924	outcome	TRUE	reported	380248	378749	1499	10	17025378	0.012179	5.30640019194777e-42	13840	NA	NA	eqtl-a-ENSG00000026025	TRUE	reported	eqtl-a-ENSG00000026025	rs1543092	5.30640019194777e-42	2	1	TRUE	0.114676190752461	184.403421231728	VIM	ENSG00000026025
574	eqtl-a-ENSG00000026025	rs165530	C	A	C	A	0.241527	-0.0149097	0.735479	0.758845	FALSE	FALSE	FALSE	KIRC	17239757	0.729936	0.04319	outcome	TRUE	reported	380248	378749	1499	10	17281756	0.0133396	2.84708215979933e-73	14247	NA	NA	eqtl-a-ENSG00000026025	TRUE	reported	eqtl-a-ENSG00000026025	rs165530	2.84708215979933e-73	2	1	TRUE	0.149986083104892	327.827785440153	VIM	ENSG00000026025
575	eqtl-a-ENSG00000026025	rs1687694	A	C	A	C	0.15994	-0.0414371	0.36982	0.339973	FALSE	FALSE	FALSE	KIRC	16971193	0.287542	0.0389619	outcome	TRUE	reported	380248	378749	1499	10	17013192	0.012255	6.28781854118042e-39	14263	NA	NA	eqtl-a-ENSG00000026025	TRUE	reported	eqtl-a-ENSG00000026025	rs1687694	6.28781854118042e-39	2	1	TRUE	0.108640215501661	170.328590350469	VIM	ENSG00000026025
576	eqtl-a-ENSG00000026025	rs17465759	C	T	C	T	0.192849	0.0218065	0.0806124	0.0739816	FALSE	FALSE	FALSE	KIRC	17189195	0.757129	0.0705134	outcome	TRUE	reported	380248	378749	1499	10	17231194	0.0218019	9.12010839355912e-19	14256	NA	NA	eqtl-a-ENSG00000026025	TRUE	reported	eqtl-a-ENSG00000026025	rs17465759	9.12010839355912e-19	2	1	TRUE	0.0738866480582425	78.2431084492855	VIM	ENSG00000026025
577	eqtl-a-ENSG00000026025	rs17696736	G	A	G	A	-0.0754707	0.0479847	0.408694	0.398415	FALSE	FALSE	FALSE	KIRC	112049014	0.202822	0.0376778	outcome	TRUE	reported	380248	378749	1499	12	112486818	0.0120904	4.30913400556668e-10	14263	NA	NA	eqtl-a-ENSG00000026025	TRUE	reported	eqtl-a-ENSG00000026025	rs17696736	4.30913400556668e-10	2	1	TRUE	-0.0522	38.9650661268499	VIM	ENSG00000026025
578	eqtl-a-ENSG00000026025	rs1907364	T	C	T	C	0.0617497	-0.0625088	0.410838	0.358807	FALSE	FALSE	FALSE	KIRC	17089073	0.103944	0.0384427	outcome	TRUE	reported	380248	378749	1499	10	17131072	0.0120862	3.23869462114288e-07	14260	NA	NA	eqtl-a-ENSG00000026025	TRUE	reported	eqtl-a-ENSG00000026025	rs1907364	3.23869462114288e-07	2	1	TRUE	0.0427482744617735	26.1029836175584	VIM	ENSG00000026025
579	eqtl-a-ENSG00000026025	rs2271464	T	C	T	C	-0.141437	0.0366813	0.385229	0.371334	FALSE	FALSE	FALSE	KIRC	16947049	0.335799	0.0381105	outcome	TRUE	reported	380248	378749	1499	10	16989048	0.012172	3.2613694594088e-31	14261	NA	NA	eqtl-a-ENSG00000026025	TRUE	reported	eqtl-a-ENSG00000026025	rs2271464	3.2613694594088e-31	2	1	TRUE	-0.0968523	135.021	VIM	ENSG00000026025
580	eqtl-a-ENSG00000026025	rs243011	C	T	C	T	0.234845	-0.0408858	0.735221	0.753479	FALSE	FALSE	FALSE	KIRC	17265062	0.340514	0.0428954	outcome	TRUE	reported	380248	378749	1499	10	17307061	0.0133438	2.4808471080889e-69	14263	NA	NA	eqtl-a-ENSG00000026025	TRUE	reported	eqtl-a-ENSG00000026025	rs243011	2.4808471080889e-69	2	1	TRUE	0.145801141083457	309.74448917033	VIM	ENSG00000026025
581	eqtl-a-ENSG00000026025	rs2932912	T	G	T	G	0.178385	-0.0611568	0.365177	0.342149	FALSE	FALSE	FALSE	KIRC	16960683	0.116339	0.0389453	outcome	TRUE	reported	380248	378749	1499	10	17002682	0.0122698	6.91830970918942e-48	14263	NA	NA	eqtl-a-ENSG00000026025	TRUE	reported	eqtl-a-ENSG00000026025	rs2932912	6.91830970918942e-48	2	1	TRUE	0.120851218187272	211.369197249374	VIM	ENSG00000026025
582	eqtl-a-ENSG00000026025	rs3184504	C	T	C	T	0.0881842	-0.0161329	0.542056	0.592514	FALSE	FALSE	FALSE	KIRC	111446804	0.667341	0.0375358	outcome	TRUE	reported	380248	378749	1499	12	111884608	0.0119227	1.4015222602156e-13	11496	NA	NA	eqtl-a-ENSG00000026025	TRUE	reported	eqtl-a-ENSG00000026025	rs3184504	1.4015222602156e-13	2	1	TRUE	0.0688255208277332	54.7056680751502	VIM	ENSG00000026025
583	eqtl-a-ENSG00000026025	rs359285	A	G	A	G	-0.230451	0.0203683	0.260467	0.234174	FALSE	FALSE	FALSE	KIRC	17285085	0.640664	0.0436366	outcome	TRUE	reported	380248	378749	1499	10	17327084	0.0134215	4.42384599808879e-66	14262	NA	NA	eqtl-a-ENSG00000026025	TRUE	reported	eqtl-a-ENSG00000026025	rs359285	4.42384599808879e-66	2	1	TRUE	-0.142323	294.81873782748	VIM	ENSG00000026025
584	eqtl-a-ENSG00000026025	rs359302	C	T	C	T	-0.0667528	0.00166	0.710828	0.709644	FALSE	FALSE	FALSE	KIRC	17296426	0.967356	0.0405621	outcome	TRUE	reported	380248	378749	1499	10	17338425	0.0131155	3.58822774549558e-07	10333	NA	NA	eqtl-a-ENSG00000026025	TRUE	reported	eqtl-a-ENSG00000026025	rs359302	3.58822774549558e-07	2	1	TRUE	-0.0500115	25.9041455094555	VIM	ENSG00000026025
585	eqtl-a-ENSG00000026025	rs41289325	C	T	C	T	0.239206	0.0864228	0.0171732	0.020961	FALSE	FALSE	FALSE	KIRC	17228668	0.508027	0.130565	outcome	TRUE	reported	380248	378749	1499	10	17270667	0.0457679	1.72838305558137e-07	13665	NA	NA	eqtl-a-ENSG00000026025	TRUE	reported	eqtl-a-ENSG00000026025	rs41289325	1.72838305558137e-07	2	1	TRUE	0.0446688057659132	27.3163183858629	VIM	ENSG00000026025
586	eqtl-a-ENSG00000026025	rs4748343	A	G	A	G	0.0993153	0.0233153	0.21063	0.212716	FALSE	FALSE	FALSE	KIRC	17038002	0.606329	0.0452441	outcome	TRUE	reported	380248	378749	1499	10	17080001	0.0145724	9.41239186908965e-12	14261	NA	NA	eqtl-a-ENSG00000026025	TRUE	reported	eqtl-a-ENSG00000026025	rs4748343	9.41239186908965e-12	2	1	TRUE	0.0569815604703561	46.4483349300677	VIM	ENSG00000026025
587	eqtl-a-ENSG00000026025	rs55793580	T	C	T	C	-0.116173	-0.0186337	0.169838	0.179055	FALSE	FALSE	FALSE	KIRC	124247116	0.699017	0.048193	outcome	TRUE	reported	380248	378749	1499	9	127009395	0.0158204	2.08209240522012e-13	14263	NA	NA	eqtl-a-ENSG00000026025	TRUE	reported	eqtl-a-ENSG00000026025	rs55793580	2.08209240522012e-13	2	1	TRUE	-0.0613752	53.9231791784336	VIM	ENSG00000026025
588	eqtl-a-ENSG00000026025	rs56383323	A	G	A	G	-0.186388	0.164398	0.0325285	0.0210357	FALSE	FALSE	FALSE	KIRC	16919771	0.196615	0.127316	outcome	TRUE	reported	380248	378749	1499	10	16961770	0.0335134	2.67011520578331e-08	14261	NA	NA	eqtl-a-ENSG00000026025	TRUE	reported	eqtl-a-ENSG00000026025	rs56383323	2.67011520578331e-08	2	1	TRUE	-0.0465248	30.9313529260942	VIM	ENSG00000026025
589	eqtl-a-ENSG00000026025	rs597808	G	A	G	A	0.0864983	-0.0306583	0.52377	0.58634	FALSE	FALSE	FALSE	KIRC	111535554	0.413187	0.0374659	outcome	TRUE	reported	380248	378749	1499	12	111973358	0.0118947	3.54160400426463e-13	11496	NA	NA	eqtl-a-ENSG00000026025	TRUE	reported	eqtl-a-ENSG00000026025	rs597808	3.54160400426463e-13	2	1	TRUE	0.067673979359339	52.8820348655574	VIM	ENSG00000026025
590	eqtl-a-ENSG00000026025	rs653178	T	C	T	C	0.0861153	-0.0256536	0.539991	0.584995	FALSE	FALSE	FALSE	KIRC	111569952	0.493202	0.0374382	outcome	TRUE	reported	380248	378749	1499	12	112007756	0.0119197	5.02573980109591e-13	11496	NA	NA	eqtl-a-ENSG00000026025	TRUE	reported	eqtl-a-ENSG00000026025	rs653178	5.02573980109591e-13	2	1	TRUE	0.0672350214004633	52.1951304907838	VIM	ENSG00000026025
591	eqtl-a-ENSG00000026025	rs7083383	G	C	G	C	0.247402	-0.00103659	0.75973	0.775677	FALSE	TRUE	FALSE	KIRC	17218574	0.981244	0.0440935	outcome	TRUE	reported	380248	378749	1499	10	17260573	0.0137739	3.89403633879719e-72	14258	NA	NA	eqtl-a-ENSG00000026025	TRUE	reported	eqtl-a-ENSG00000026025	rs7083383	3.89403633879719e-72	2	1	TRUE	0.148760646956107	322.620946526069	VIM	ENSG00000026025
592	eqtl-a-ENSG00000026025	rs71495253	T	C	T	C	0.195212	0.0213086	0.0804298	0.0741261	FALSE	FALSE	FALSE	KIRC	17163204	0.761421	0.0701829	outcome	TRUE	reported	380248	378749	1499	10	17205203	0.0218231	3.71963221161955e-19	14257	NA	NA	eqtl-a-ENSG00000026025	TRUE	reported	eqtl-a-ENSG00000026025	rs71495253	3.71963221161955e-19	2	1	TRUE	0.0747121041808192	80.0166078603763	VIM	ENSG00000026025
593	eqtl-a-ENSG00000026025	rs79548599	C	T	C	T	-0.164866	0.0531528	0.0767942	0.0710521	FALSE	FALSE	FALSE	KIRC	17254210	0.46527	0.0727924	outcome	TRUE	reported	380248	378749	1499	10	17296209	0.0223096	1.46824996783199e-13	14263	NA	NA	eqtl-a-ENSG00000026025	TRUE	reported	eqtl-a-ENSG00000026025	rs79548599	1.46824996783199e-13	2	1	TRUE	-0.0617639	54.610812117178	VIM	ENSG00000026025
594	eqtl-a-ENSG00000026297	rs10455813	A	G	A	G	0.103407	-0.0275117	0.247138	0.274068	FALSE	FALSE	FALSE	KIRC	167360076	0.507683	0.0415303	outcome	TRUE	reported	380248	378749	1499	6	167773564	0.0137706	5.94839774069221e-14	23060	NA	NA	eqtl-a-ENSG00000026297	TRUE	reported	eqtl-a-ENSG00000026297	rs10455813	5.94839774069221e-14	2	1	TRUE	0.0493919152265079	56.3889685637603	RNASET2	ENSG00000026297
595	eqtl-a-ENSG00000026297	rs10946194	G	A	G	A	0.196754	-0.0401883	0.0234524	0.031084	FALSE	FALSE	FALSE	KIRC	166885251	0.701539	0.104864	outcome	TRUE	reported	380248	378749	1499	6	167298739	0.0392934	5.52280869596804e-07	4733	NA	NA	eqtl-a-ENSG00000026297	TRUE	reported	eqtl-a-ENSG00000026297	rs10946194	5.52280869596804e-07	2	1	TRUE	0.0726072019553394	25.0730936049146	RNASET2	ENSG00000026297
596	eqtl-a-ENSG00000026297	rs112678538	A	C	A	C	0.0825297	0.0471325	0.391007	0.395823	FALSE	FALSE	FALSE	KIRC	167420322	0.21278	0.0378283	outcome	TRUE	reported	380248	378749	1499	6	167833810	0.012177	1.22348880532682e-11	26488	NA	NA	eqtl-a-ENSG00000026297	TRUE	reported	eqtl-a-ENSG00000026297	rs112678538	1.22348880532682e-11	2	1	TRUE	0.041608829743839	45.9345980860893	RNASET2	ENSG00000026297
597	eqtl-a-ENSG00000026297	rs113626729	A	G	A	G	-0.378706	0.0732746	0.0477857	0.0710503	FALSE	FALSE	FALSE	KIRC	167291775	0.310319	0.0722234	outcome	TRUE	reported	380248	378749	1499	6	167705263	0.0277189	1.69824365246173e-42	20864	NA	NA	eqtl-a-ENSG00000026297	TRUE	reported	eqtl-a-ENSG00000026297	rs113626729	1.69824365246173e-42	2	1	TRUE	-0.0941703	186.660484343952	RNASET2	ENSG00000026297
598	eqtl-a-ENSG00000026297	rs11575088	A	C	A	C	0.387025	0.0676806	0.158526	0.122798	FALSE	FALSE	FALSE	KIRC	167143546	0.230175	0.0564048	outcome	TRUE	reported	380248	378749	1499	6	167557034	0.0159668	8.5506671288466e-130	26494	NA	NA	eqtl-a-ENSG00000026297	TRUE	reported	eqtl-a-ENSG00000026297	rs11575088	8.5506671288466e-130	2	1	TRUE	0.147299217659624	587.546532985756	RNASET2	ENSG00000026297
599	eqtl-a-ENSG00000026297	rs117354391	A	G	A	G	0.20118	-0.0519916	0.0220989	0.0400714	FALSE	FALSE	FALSE	KIRC	166725011	0.583911	0.0949307	outcome	TRUE	reported	380248	378749	1499	6	167138499	0.0404512	6.57885023556717e-07	21087	NA	NA	eqtl-a-ENSG00000026297	TRUE	reported	eqtl-a-ENSG00000026297	rs117354391	6.57885023556717e-07	2	1	TRUE	0.0342304025474054	24.7347080321209	RNASET2	ENSG00000026297
600	eqtl-a-ENSG00000026297	rs117421924	T	C	T	C	0.597236	-0.144134	0.0159655	0.0312095	FALSE	FALSE	FALSE	KIRC	166892589	0.18836	0.109571	outcome	TRUE	reported	380248	378749	1499	6	167306077	0.0472172	1.13893778187571e-36	17757	NA	NA	eqtl-a-ENSG00000026297	TRUE	reported	eqtl-a-ENSG00000026297	rs117421924	1.13893778187571e-36	2	1	TRUE	0.0945012317844796	159.989505801101	RNASET2	ENSG00000026297
601	eqtl-a-ENSG00000026297	rs117541920	G	A	G	A	-0.174936	0.0390598	0.390936	0.416334	FALSE	FALSE	FALSE	KIRC	167184541	0.299482	0.0376463	outcome	TRUE	reported	380248	378749	1499	6	167598029	0.012108	2.58047704443604e-47	23697	NA	NA	eqtl-a-ENSG00000026297	TRUE	reported	eqtl-a-ENSG00000026297	rs117541920	2.58047704443604e-47	2	1	TRUE	-0.0934488	208.743787576823	RNASET2	ENSG00000026297
602	eqtl-a-ENSG00000026297	rs117921098	A	G	A	G	-0.360908	-0.134383	0.0349443	0.081874	FALSE	FALSE	FALSE	KIRC	166893503	0.0484898	0.0681095	outcome	TRUE	reported	380248	378749	1499	6	167306991	0.0322674	4.82947586444772e-29	20361	NA	NA	eqtl-a-ENSG00000026297	TRUE	reported	eqtl-a-ENSG00000026297	rs117921098	4.82947586444772e-29	2	1	TRUE	-0.0781491	125.102236018089	RNASET2	ENSG00000026297
603	eqtl-a-ENSG00000026297	rs118180337	A	G	A	G	-0.343234	0.0445476	0.0141328	0.0258534	FALSE	FALSE	FALSE	KIRC	166896913	0.707938	0.118912	outcome	TRUE	reported	380248	378749	1499	6	167310401	0.0503393	9.20661537501971e-12	14293	NA	NA	eqtl-a-ENSG00000026297	TRUE	reported	eqtl-a-ENSG00000026297	rs118180337	9.20661537501971e-12	2	1	TRUE	-0.0569438	46.4907185817026	RNASET2	ENSG00000026297
604	eqtl-a-ENSG00000026297	rs11961382	T	G	T	G	-0.11408	-0.0389481	0.147662	0.162487	FALSE	FALSE	FALSE	KIRC	166829400	0.435627	0.0499592	outcome	TRUE	reported	380248	378749	1499	6	167242888	0.0167491	9.67832050488158e-12	26493	NA	NA	eqtl-a-ENSG00000026297	TRUE	reported	eqtl-a-ENSG00000026297	rs11961382	9.67832050488158e-12	2	1	TRUE	-0.0418108	46.3912499304379	RNASET2	ENSG00000026297
605	eqtl-a-ENSG00000026297	rs13214856	A	G	A	G	0.677395	0.0170134	0.106164	0.0997036	FALSE	FALSE	FALSE	KIRC	166952374	0.783531	0.0619299	outcome	TRUE	reported	380248	378749	1499	6	167365862	0.0184604	1e-200	26280	NA	NA	eqtl-a-ENSG00000026297	TRUE	reported	eqtl-a-ENSG00000026297	rs13214856	1e-200	2	1	TRUE	0.22077697506411	1346.48574267373	RNASET2	ENSG00000026297
606	eqtl-a-ENSG00000026297	rs141099161	T	G	T	G	0.270829	-0.234223	0.0136871	0.00835099	FALSE	FALSE	FALSE	KIRC	167287419	0.240011	0.199346	outcome	TRUE	reported	380248	378749	1499	6	167700907	0.0511742	1.20850930879395e-07	10119	NA	NA	eqtl-a-ENSG00000026297	TRUE	reported	eqtl-a-ENSG00000026297	rs141099161	1.20850930879395e-07	2	1	TRUE	0.0525433669502161	28.0083940635441	RNASET2	ENSG00000026297
607	eqtl-a-ENSG00000026297	rs141769481	T	C	T	C	-0.191567	-0.0913688	0.0219803	0.0233973	FALSE	FALSE	FALSE	KIRC	166618920	0.463787	0.124714	outcome	TRUE	reported	380248	378749	1499	6	167032408	0.0405612	2.32391372023524e-06	2434	NA	NA	eqtl-a-ENSG00000026297	TRUE	reported	eqtl-a-ENSG00000026297	rs141769481	2.32391372023524e-06	2	1	TRUE	-0.0953335	22.3059028331382	RNASET2	ENSG00000026297
608	eqtl-a-ENSG00000026297	rs141830482	G	A	G	A	-0.230053	-0.149634	0.0258237	0.0194074	FALSE	FALSE	FALSE	KIRC	167450962	0.269407	0.135486	outcome	TRUE	reported	380248	378749	1499	6	167863179	0.0374746	8.30424206152315e-10	18665	NA	NA	eqtl-a-ENSG00000026297	TRUE	reported	eqtl-a-ENSG00000026297	rs141830482	8.30424206152315e-10	2	1	TRUE	-0.0448913	37.6861515478052	RNASET2	ENSG00000026297
609	eqtl-a-ENSG00000026297	rs142980557	T	C	T	C	-0.342289	0.0665143	0.0153494	0.0115734	FALSE	FALSE	FALSE	KIRC	166911114	0.705086	0.175748	outcome	TRUE	reported	380248	378749	1499	6	167324602	0.0483268	1.41058739930947e-12	7199	NA	NA	eqtl-a-ENSG00000026297	TRUE	reported	eqtl-a-ENSG00000026297	rs142980557	1.41058739930947e-12	2	1	TRUE	-0.0831995	50.1660385341376	RNASET2	ENSG00000026297
610	eqtl-a-ENSG00000026297	rs143198916	C	T	C	T	0.246961	0.274696	0.0173697	0.0225044	FALSE	FALSE	FALSE	KIRC	167302334	0.0340463	0.129603	outcome	TRUE	reported	380248	378749	1499	6	167715822	0.0455093	5.75016093691183e-08	2821	NA	NA	eqtl-a-ENSG00000026297	TRUE	reported	eqtl-a-ENSG00000026297	rs143198916	5.75016093691183e-08	2	1	TRUE	0.101677314822211	29.4480430359702	RNASET2	ENSG00000026297
611	eqtl-a-ENSG00000026297	rs143427323	A	G	A	G	-0.285345	-0.00558928	0.0165939	0.0331025	FALSE	FALSE	FALSE	KIRC	166849518	0.957749	0.1055	outcome	TRUE	reported	380248	378749	1499	6	167263006	0.0465293	8.64529864045622e-10	4580	NA	NA	eqtl-a-ENSG00000026297	TRUE	reported	eqtl-a-ENSG00000026297	rs143427323	8.64529864045622e-10	2	1	TRUE	-0.0902671	37.6086285057478	RNASET2	ENSG00000026297
612	eqtl-a-ENSG00000026297	rs143530780	C	T	C	T	-0.240208	0.0327846	0.0248439	0.0403588	FALSE	FALSE	FALSE	KIRC	167437533	0.727039	0.093921	outcome	TRUE	reported	380248	378749	1499	6	167849750	0.0381847	3.15827541759679e-10	12015	NA	NA	eqtl-a-ENSG00000026297	TRUE	reported	eqtl-a-ENSG00000026297	rs143530780	3.15827541759679e-10	2	1	TRUE	-0.0573005	39.5727442865243	RNASET2	ENSG00000026297
613	eqtl-a-ENSG00000026297	rs143555549	G	A	G	A	0.257102	0.149379	0.0167221	0.0122692	FALSE	FALSE	FALSE	KIRC	167304947	0.376567	0.168935	outcome	TRUE	reported	380248	378749	1499	6	167718435	0.0463648	2.93622951579518e-08	17432	NA	NA	eqtl-a-ENSG00000026297	TRUE	reported	eqtl-a-ENSG00000026297	rs143555549	2.93622951579518e-08	2	1	TRUE	0.0419648453385122	30.7492217608871	RNASET2	ENSG00000026297
614	eqtl-a-ENSG00000026297	rs143645302	A	G	A	G	0.485603	0.190373	0.0304089	0.0197155	FALSE	FALSE	FALSE	KIRC	166867845	0.157746	0.134759	outcome	TRUE	reported	380248	378749	1499	6	167281333	0.0344199	3.39078302251924e-45	25338	NA	NA	eqtl-a-ENSG00000026297	TRUE	reported	eqtl-a-ENSG00000026297	rs143645302	3.39078302251924e-45	2	1	TRUE	0.0882883648113985	199.041443994048	RNASET2	ENSG00000026297
615	eqtl-a-ENSG00000026297	rs146533271	A	G	A	G	0.311996	-0.0346422	0.0670564	0.107055	FALSE	FALSE	FALSE	KIRC	166894612	0.565243	0.0602399	outcome	TRUE	reported	380248	378749	1499	6	167308100	0.0236502	9.75663369370956e-40	22235	NA	NA	eqtl-a-ENSG00000026297	TRUE	reported	eqtl-a-ENSG00000026297	rs146533271	9.75663369370956e-40	2	1	TRUE	0.0881296496979027	174.031721715024	RNASET2	ENSG00000026297
616	eqtl-a-ENSG00000026297	rs146775478	G	A	G	A	-0.19728	0.103152	0.023811	0.0106628	FALSE	FALSE	FALSE	KIRC	167302135	0.570489	0.181819	outcome	TRUE	reported	380248	378749	1499	6	167715623	0.0390028	4.2323346502184e-07	16610	NA	NA	eqtl-a-ENSG00000026297	TRUE	reported	eqtl-a-ENSG00000026297	rs146775478	4.2323346502184e-07	2	1	TRUE	-0.0392188	25.5843593526206	RNASET2	ENSG00000026297
617	eqtl-a-ENSG00000026297	rs147269636	G	A	G	A	-0.150671	-0.0595988	0.0341903	0.0360751	FALSE	FALSE	FALSE	KIRC	167435919	0.546939	0.0989432	outcome	TRUE	reported	380248	378749	1499	6	167848136	0.0327282	4.14848954574293e-06	19216	NA	NA	eqtl-a-ENSG00000026297	TRUE	reported	eqtl-a-ENSG00000026297	rs147269636	4.14848954574293e-06	2	1	TRUE	-0.033194	21.194105921621	RNASET2	ENSG00000026297
618	eqtl-a-ENSG00000026297	rs148590042	A	C	A	C	0.200361	-0.00187294	0.0211661	0.0135211	FALSE	FALSE	FALSE	KIRC	167442863	0.990642	0.159684	outcome	TRUE	reported	380248	378749	1499	6	167855080	0.041315	1.23708630748927e-06	12520	NA	NA	eqtl-a-ENSG00000026297	TRUE	reported	eqtl-a-ENSG00000026297	rs148590042	1.23708630748927e-06	2	1	TRUE	0.0433042349877827	23.5185675732982	RNASET2	ENSG00000026297
619	eqtl-a-ENSG00000026297	rs149110519	T	C	T	C	-0.130352	0.0939635	0.0526158	0.0257763	FALSE	FALSE	FALSE	KIRC	144064640	0.416783	0.115716	outcome	TRUE	reported	380248	378749	1499	6	144385777	0.0266352	9.87051925385151e-07	20660	NA	NA	eqtl-a-ENSG00000026297	TRUE	reported	eqtl-a-ENSG00000026297	rs149110519	9.87051925385151e-07	2	1	TRUE	-0.0340303	23.9509902275783	RNASET2	ENSG00000026297
620	eqtl-a-ENSG00000026297	rs149305758	C	A	C	A	0.446467	-0.104499	0.0136859	0.00728981	FALSE	FALSE	FALSE	KIRC	166864122	0.642364	0.225021	outcome	TRUE	reported	380248	378749	1499	6	167277610	0.0510891	2.35613407393384e-18	4859	NA	NA	eqtl-a-ENSG00000026297	TRUE	reported	eqtl-a-ENSG00000026297	rs149305758	2.35613407393384e-18	2	1	TRUE	0.124419735040762	76.3699003745817	RNASET2	ENSG00000026297
621	eqtl-a-ENSG00000026297	rs149764714	A	G	A	G	0.517179	-0.058846	0.0136352	0.012602	FALSE	FALSE	FALSE	KIRC	167172877	0.722836	0.165918	outcome	TRUE	reported	380248	378749	1499	6	167586365	0.051136	4.798439240639e-24	7884	NA	NA	eqtl-a-ENSG00000026297	TRUE	reported	eqtl-a-ENSG00000026297	rs149764714	4.798439240639e-24	2	1	TRUE	0.113186859203759	102.288840947701	RNASET2	ENSG00000026297
622	eqtl-a-ENSG00000026297	rs162293	T	C	T	C	0.685758	0.0419694	0.302167	0.32022	FALSE	FALSE	FALSE	KIRC	167036683	0.290954	0.0397426	outcome	TRUE	reported	380248	378749	1499	6	167450171	0.011605	1e-200	26492	NA	NA	eqtl-a-ENSG00000026297	TRUE	reported	eqtl-a-ENSG00000026297	rs162293	1e-200	2	1	TRUE	0.341268939900115	3491.81700725129	RNASET2	ENSG00000026297
623	eqtl-a-ENSG00000026297	rs17591358	T	C	T	C	-0.281698	0.0175177	0.0986261	0.121692	FALSE	FALSE	FALSE	KIRC	166798090	0.756706	0.0565433	outcome	TRUE	reported	380248	378749	1499	6	167211578	0.0198203	7.63132588705096e-46	26494	NA	NA	eqtl-a-ENSG00000026297	TRUE	reported	eqtl-a-ENSG00000026297	rs17591358	7.63132588705096e-46	2	1	TRUE	-0.0869895	201.998004812095	RNASET2	ENSG00000026297
624	eqtl-a-ENSG00000026297	rs182099574	T	C	T	C	-0.379567	-0.0780272	0.0152681	0.0350984	FALSE	FALSE	FALSE	KIRC	166850860	0.455875	0.104642	outcome	TRUE	reported	380248	378749	1499	6	167264348	0.0484339	4.61423809087643e-15	7925	NA	NA	eqtl-a-ENSG00000026297	TRUE	reported	eqtl-a-ENSG00000026297	rs182099574	4.61423809087643e-15	2	1	TRUE	-0.0877036	61.415503000258	RNASET2	ENSG00000026297
625	eqtl-a-ENSG00000026297	rs186514078	A	G	A	G	-0.291701	0.239317	0.0143125	0.00485225	FALSE	FALSE	FALSE	KIRC	167146589	0.400334	0.284553	outcome	TRUE	reported	380248	378749	1499	6	167560077	0.050049	5.59615841602672e-09	3738	NA	NA	eqtl-a-ENSG00000026297	TRUE	reported	eqtl-a-ENSG00000026297	rs186514078	5.59615841602672e-09	2	1	TRUE	-0.0949235	33.9691771491898	RNASET2	ENSG00000026297
626	eqtl-a-ENSG00000026297	rs191484464	T	C	T	C	-0.375976	-0.0290814	0.0336375	0.0554194	FALSE	FALSE	FALSE	KIRC	167371146	0.718914	0.0808018	outcome	TRUE	reported	380248	378749	1499	6	167784634	0.0328593	2.57276429534677e-30	19948	NA	NA	eqtl-a-ENSG00000026297	TRUE	reported	eqtl-a-ENSG00000026297	rs191484464	2.57276429534677e-30	2	1	TRUE	-0.080752	130.919286975534	RNASET2	ENSG00000026297
627	eqtl-a-ENSG00000026297	rs191705650	A	G	A	G	-0.551802	0.0988268	0.017971	0.0090249	FALSE	FALSE	FALSE	KIRC	167277428	0.62078	0.199753	outcome	TRUE	reported	380248	378749	1499	6	167690916	0.0445605	3.21440059652439e-35	16471	NA	NA	eqtl-a-ENSG00000026297	TRUE	reported	eqtl-a-ENSG00000026297	rs191705650	3.21440059652439e-35	2	1	TRUE	-0.0960477	153.343873672162	RNASET2	ENSG00000026297
628	eqtl-a-ENSG00000026297	rs1927432	A	G	A	G	-0.0993174	0.0147488	0.81495	0.806497	FALSE	FALSE	FALSE	KIRC	166787545	0.751841	0.0466422	outcome	TRUE	reported	380248	378749	1499	6	167201033	0.0153034	8.59409202953284e-11	26609	NA	NA	eqtl-a-ENSG00000026297	TRUE	reported	eqtl-a-ENSG00000026297	rs1927432	8.59409202953284e-11	2	1	TRUE	-0.0397554	42.1186869480879	RNASET2	ENSG00000026297
629	eqtl-a-ENSG00000026297	rs2072765	T	C	T	C	-0.169907	-0.041531	0.15489	0.152116	FALSE	FALSE	FALSE	KIRC	167304171	0.422169	0.0517415	outcome	TRUE	reported	380248	378749	1499	6	167717659	0.0163881	3.47456147497044e-25	26280	NA	NA	eqtl-a-ENSG00000026297	TRUE	reported	eqtl-a-ENSG00000026297	rs2072765	3.47456147497044e-25	2	1	TRUE	-0.0638264	107.489324287972	RNASET2	ENSG00000026297
630	eqtl-a-ENSG00000026297	rs2183706	T	C	T	C	-0.21039	0.028259	0.561235	0.544307	FALSE	FALSE	FALSE	KIRC	167232114	0.446601	0.0371295	outcome	TRUE	reported	380248	378749	1499	6	167645602	0.0118623	2.21921817225125e-70	26488	NA	NA	eqtl-a-ENSG00000026297	TRUE	reported	eqtl-a-ENSG00000026297	rs2183706	2.21921817225125e-70	2	1	TRUE	-0.108339	314.566435206018	RNASET2	ENSG00000026297
631	eqtl-a-ENSG00000026297	rs2239824	A	T	A	T	-0.750885	-0.049744	0.376137	0.363445	FALSE	TRUE	FALSE	KIRC	167098311	0.194879	0.0383744	outcome	TRUE	reported	380248	378749	1499	6	167511799	0.0105362	1e-200	21996	NA	NA	eqtl-a-ENSG00000026297	TRUE	reported	eqtl-a-ENSG00000026297	rs2239824	1e-200	2	1	TRUE	-0.433133	5079.0074019373	RNASET2	ENSG00000026297
632	eqtl-a-ENSG00000026297	rs2239827	A	G	A	G	-0.8712	-0.0456998	0.392416	0.388607	FALSE	FALSE	FALSE	KIRC	167077457	0.226222	0.0377637	outcome	TRUE	reported	380248	378749	1499	6	167490945	0.00973652	1e-200	26491	NA	NA	eqtl-a-ENSG00000026297	TRUE	reported	eqtl-a-ENSG00000026297	rs2239827	1e-200	2	1	TRUE	-0.481764	8006.23277877679	RNASET2	ENSG00000026297
633	eqtl-a-ENSG00000026297	rs2282861	T	C	T	C	-0.948614	0.00783577	0.470404	0.431872	FALSE	FALSE	FALSE	KIRC	167026640	0.833061	0.0371756	outcome	TRUE	reported	380248	378749	1499	6	167440128	0.00885657	1e-200	26608	NA	NA	eqtl-a-ENSG00000026297	TRUE	reported	eqtl-a-ENSG00000026297	rs2282861	1e-200	2	1	TRUE	-0.54889	11472.2325174886	RNASET2	ENSG00000026297
634	eqtl-a-ENSG00000026297	rs2769339	C	T	C	T	0.616497	0.00553994	0.124995	0.185419	FALSE	FALSE	FALSE	KIRC	166942366	0.907575	0.047718	outcome	TRUE	reported	380248	378749	1499	6	167355854	0.0172324	1e-200	26153	NA	NA	eqtl-a-ENSG00000026297	TRUE	reported	eqtl-a-ENSG00000026297	rs2769339	1e-200	2	1	TRUE	0.216005745827245	1279.88338498192	RNASET2	ENSG00000026297
635	eqtl-a-ENSG00000026297	rs3093026	T	C	T	C	0.552892	0.0630925	0.479031	0.493634	FALSE	FALSE	FALSE	KIRC	167119202	0.088587	0.0370501	outcome	TRUE	reported	380248	378749	1499	6	167532690	0.0109675	1e-200	26491	NA	NA	eqtl-a-ENSG00000026297	TRUE	reported	eqtl-a-ENSG00000026297	rs3093026	1e-200	2	1	TRUE	0.29587378670968	2541.35494332495	RNASET2	ENSG00000026297
636	eqtl-a-ENSG00000026297	rs34446684	C	T	C	T	0.168047	-0.0776205	0.136523	0.152499	FALSE	FALSE	FALSE	KIRC	167260795	0.13099	0.0513971	outcome	TRUE	reported	380248	378749	1499	6	167674283	0.0172769	2.32220202801473e-22	26490	NA	NA	eqtl-a-ENSG00000026297	TRUE	reported	eqtl-a-ENSG00000026297	rs34446684	2.32220202801473e-22	2	1	TRUE	0.0596576507230573	94.6084415382182	RNASET2	ENSG00000026297
637	eqtl-a-ENSG00000026297	rs35020982	C	T	C	T	0.183044	-0.0778739	0.137829	0.153274	FALSE	FALSE	FALSE	KIRC	167247651	0.128429	0.0512218	outcome	TRUE	reported	380248	378749	1499	6	167661139	0.0171966	1.85951634446247e-26	26609	NA	NA	eqtl-a-ENSG00000026297	TRUE	reported	eqtl-a-ENSG00000026297	rs35020982	1.85951634446247e-26	2	1	TRUE	0.0651166803284662	113.298932089513	RNASET2	ENSG00000026297
638	eqtl-a-ENSG00000026297	rs3814080	G	A	G	A	0.104881	0.0425113	0.344558	0.405092	FALSE	FALSE	FALSE	KIRC	167324194	0.257899	0.037575	outcome	TRUE	reported	380248	378749	1499	6	167737682	0.0124929	4.65907820110126e-17	26608	NA	NA	eqtl-a-ENSG00000026297	TRUE	reported	eqtl-a-ENSG00000026297	rs3814080	4.65907820110126e-17	2	1	TRUE	0.0514007306744979	70.4801973960387	RNASET2	ENSG00000026297
639	eqtl-a-ENSG00000026297	rs400063	T	C	T	C	-1.05088	0.014949	0.524025	0.488585	FALSE	FALSE	FALSE	KIRC	166973104	0.685119	0.0368668	outcome	TRUE	reported	380248	378749	1499	6	167386592	0.00798638	1e-200	26493	NA	NA	eqtl-a-ENSG00000026297	TRUE	reported	eqtl-a-ENSG00000026297	rs400063	1e-200	2	1	TRUE	-0.628694	17314.3547923022	RNASET2	ENSG00000026297
640	eqtl-a-ENSG00000026297	rs421214	G	A	G	A	-1.05097	0.0148927	0.523028	0.488561	FALSE	FALSE	FALSE	KIRC	166983141	0.686272	0.0368702	outcome	TRUE	reported	380248	378749	1499	6	167396629	0.00798384	1e-200	26490	NA	NA	eqtl-a-ENSG00000026297	TRUE	reported	eqtl-a-ENSG00000026297	rs421214	1e-200	2	1	TRUE	-0.628869	17328.3411181166	RNASET2	ENSG00000026297
641	eqtl-a-ENSG00000026297	rs4360309	T	C	T	C	0.0553457	0.0654402	0.495365	0.50497	FALSE	FALSE	FALSE	KIRC	125511281	0.0788606	0.0372382	outcome	TRUE	reported	380248	378749	1499	8	126523523	0.0118949	3.27461313865009e-06	25781	NA	NA	eqtl-a-ENSG00000026297	TRUE	reported	eqtl-a-ENSG00000026297	rs4360309	3.27461313865009e-06	2	1	TRUE	0.0289672835582314	21.6494156589321	RNASET2	ENSG00000026297
642	eqtl-a-ENSG00000026297	rs4709137	T	C	T	C	0.230721	-0.0451078	0.0286867	0.0464117	FALSE	FALSE	FALSE	KIRC	166857565	0.603426	0.0868328	outcome	TRUE	reported	380248	378749	1499	6	167271053	0.0356024	9.14744906671498e-11	13630	NA	NA	eqtl-a-ENSG00000026297	TRUE	reported	eqtl-a-ENSG00000026297	rs4709137	9.14744906671498e-11	2	1	TRUE	0.0554272899013807	41.9967516681714	RNASET2	ENSG00000026297
643	eqtl-a-ENSG00000026297	rs4709138	A	C	A	C	0.181974	-0.0404382	0.0244431	0.0310899	FALSE	FALSE	FALSE	KIRC	166872690	0.699641	0.104815	outcome	TRUE	reported	380248	378749	1499	6	167286178	0.0385121	2.30117686937938e-06	4848	NA	NA	eqtl-a-ENSG00000026297	TRUE	reported	eqtl-a-ENSG00000026297	rs4709138	2.30117686937938e-06	2	1	TRUE	0.0677208318342304	22.326686883441	RNASET2	ENSG00000026297
644	eqtl-a-ENSG00000026297	rs4710089	A	G	A	G	-0.107908	0.00414191	0.220015	0.295991	FALSE	FALSE	FALSE	KIRC	166748035	0.919398	0.0409312	outcome	TRUE	reported	380248	378749	1499	6	167161523	0.0143386	5.23962251905938e-14	25671	NA	NA	eqtl-a-ENSG00000026297	TRUE	reported	eqtl-a-ENSG00000026297	rs4710089	5.23962251905938e-14	2	1	TRUE	-0.0469206	56.6361583695818	RNASET2	ENSG00000026297
645	eqtl-a-ENSG00000026297	rs4710213	C	T	C	T	-0.274431	0.0139297	0.541902	0.53405	FALSE	FALSE	FALSE	KIRC	167220625	0.706937	0.0370497	outcome	TRUE	reported	380248	378749	1499	6	167634113	0.0117201	2.97851642942922e-121	26156	NA	NA	eqtl-a-ENSG00000026297	TRUE	reported	eqtl-a-ENSG00000026297	rs4710213	2.97851642942922e-121	2	1	TRUE	-0.143294	548.281638278817	RNASET2	ENSG00000026297
646	eqtl-a-ENSG00000026297	rs55984088	A	G	A	G	0.336563	0.196435	0.0134986	0.00606895	FALSE	FALSE	FALSE	KIRC	166662383	0.4115	0.239188	outcome	TRUE	reported	380248	378749	1499	6	167075871	0.0514985	6.34453795775715e-11	11816	NA	NA	eqtl-a-ENSG00000026297	TRUE	reported	eqtl-a-ENSG00000026297	rs55984088	6.34453795775715e-11	2	1	TRUE	0.0600191259517297	42.7113778040419	RNASET2	ENSG00000026297
647	eqtl-a-ENSG00000026297	rs56131036	C	A	C	A	-0.436602	-0.130668	0.023871	0.0410256	FALSE	FALSE	FALSE	KIRC	166878498	0.16825	0.0948345	outcome	TRUE	reported	380248	378749	1499	6	167291986	0.0388166	2.36919059527764e-29	19752	NA	NA	eqtl-a-ENSG00000026297	TRUE	reported	eqtl-a-ENSG00000026297	rs56131036	2.36919059527764e-29	2	1	TRUE	-0.0797808	126.513379521607	RNASET2	ENSG00000026297
648	eqtl-a-ENSG00000026297	rs56329501	C	T	C	T	0.083897	0.0374641	0.139595	0.150662	FALSE	FALSE	FALSE	KIRC	166775223	0.471665	0.05205	outcome	TRUE	reported	380248	378749	1499	6	167188711	0.017159	1.01139313159964e-06	26165	NA	NA	eqtl-a-ENSG00000026297	TRUE	reported	eqtl-a-ENSG00000026297	rs56329501	1.01139313159964e-06	2	1	TRUE	0.0302142878054714	23.9061100610434	RNASET2	ENSG00000026297
649	eqtl-a-ENSG00000026297	rs60505825	A	T	A	T	-0.194538	-0.00493675	0.121636	0.143642	FALSE	TRUE	FALSE	KIRC	166818760	0.925047	0.0524746	outcome	TRUE	reported	380248	378749	1499	6	167232248	0.0181348	7.57007182299967e-27	26604	NA	NA	eqtl-a-ENSG00000026297	TRUE	reported	eqtl-a-ENSG00000026297	rs60505825	7.57007182299967e-27	2	1	TRUE	-0.0656292	115.075627758575	RNASET2	ENSG00000026297
650	eqtl-a-ENSG00000026297	rs60913241	G	C	G	C	0.29268	0.118004	0.0204341	0.00399531	FALSE	TRUE	FALSE	KIRC	166906583	0.673194	0.279782	outcome	TRUE	reported	380248	378749	1499	6	167320071	0.0419956	3.18786557569591e-12	22389	NA	NA	eqtl-a-ENSG00000026297	TRUE	reported	eqtl-a-ENSG00000026297	rs60913241	3.18786557569591e-12	2	1	TRUE	0.0465286755842756	48.5711640373529	RNASET2	ENSG00000026297
651	eqtl-a-ENSG00000026297	rs62436418	C	T	C	T	0.507935	-0.00173058	0.334551	0.282584	FALSE	FALSE	FALSE	KIRC	166932284	0.966752	0.0415188	outcome	TRUE	reported	380248	378749	1499	6	167345772	0.0118675	1e-200	26280	NA	NA	eqtl-a-ENSG00000026297	TRUE	reported	eqtl-a-ENSG00000026297	rs62436418	1e-200	2	1	TRUE	0.255281520559879	1831.88327811532	RNASET2	ENSG00000026297
652	eqtl-a-ENSG00000026297	rs62436761	T	C	T	C	0.910339	0.115659	0.121546	0.0718821	FALSE	FALSE	FALSE	KIRC	167015099	0.105889	0.0715292	outcome	TRUE	reported	380248	378749	1499	6	167428587	0.0165243	1e-200	26163	NA	NA	eqtl-a-ENSG00000026297	TRUE	reported	eqtl-a-ENSG00000026297	rs62436761	1e-200	2	1	TRUE	0.32241729082166	3035.01020420596	RNASET2	ENSG00000026297
653	eqtl-a-ENSG00000026297	rs62436852	A	G	A	G	0.594897	0.117523	0.0821931	0.066845	FALSE	FALSE	FALSE	KIRC	167171318	0.11672	0.0749176	outcome	TRUE	reported	380248	378749	1499	6	167584806	0.0210832	3.65594791613115e-175	26164	NA	NA	eqtl-a-ENSG00000026297	TRUE	reported	eqtl-a-ENSG00000026297	rs62436852	3.65594791613115e-175	2	1	TRUE	0.171854131407651	796.178600382019	RNASET2	ENSG00000026297
654	eqtl-a-ENSG00000026297	rs62438721	G	A	G	A	-0.284935	-0.00859946	0.100225	0.147582	FALSE	FALSE	FALSE	KIRC	166773288	0.870363	0.0526937	outcome	TRUE	reported	380248	378749	1499	6	167186776	0.0196738	1.54703450394793e-47	25827	NA	NA	eqtl-a-ENSG00000026297	TRUE	reported	eqtl-a-ENSG00000026297	rs62438721	1.54703450394793e-47	2	1	TRUE	-0.0897596	209.756338769987	RNASET2	ENSG00000026297
655	eqtl-a-ENSG00000026297	rs637191	A	G	A	G	0.171884	0.00845111	0.102777	0.107453	FALSE	FALSE	FALSE	KIRC	166764245	0.887298	0.0596305	outcome	TRUE	reported	380248	378749	1499	6	167177733	0.0195461	1.44577263387363e-18	23512	NA	NA	eqtl-a-ENSG00000026297	TRUE	reported	eqtl-a-ENSG00000026297	rs637191	1.44577263387363e-18	2	1	TRUE	0.0572579690635415	77.3304737769893	RNASET2	ENSG00000026297
656	eqtl-a-ENSG00000026297	rs6456156	C	T	C	T	-0.613536	-0.0571177	0.491619	0.456914	FALSE	FALSE	FALSE	KIRC	167108812	0.123063	0.0370403	outcome	TRUE	reported	380248	378749	1499	6	167522300	0.0107268	1e-200	26609	NA	NA	eqtl-a-ENSG00000026297	TRUE	reported	eqtl-a-ENSG00000026297	rs6456156	1e-200	2	1	TRUE	-0.330896	3271.44583802704	RNASET2	ENSG00000026297
657	eqtl-a-ENSG00000026297	rs6909180	G	A	G	A	-0.85802	-0.0354021	0.403465	0.394217	FALSE	FALSE	FALSE	KIRC	167047049	0.347414	0.0376771	outcome	TRUE	reported	380248	378749	1499	6	167460537	0.00974794	1e-200	26493	NA	NA	eqtl-a-ENSG00000026297	TRUE	reported	eqtl-a-ENSG00000026297	rs6909180	1e-200	2	1	TRUE	-0.475693	7747.63455623681	RNASET2	ENSG00000026297
658	eqtl-a-ENSG00000026297	rs6910826	T	G	T	G	0.101494	0.0237047	0.153557	0.132466	FALSE	FALSE	FALSE	KIRC	166737442	0.661287	0.0541036	outcome	TRUE	reported	380248	378749	1499	6	167150930	0.0164865	7.45109327398765e-10	26609	NA	NA	eqtl-a-ENSG00000026297	TRUE	reported	eqtl-a-ENSG00000026297	rs6910826	7.45109327398765e-10	2	1	TRUE	0.037714197030063	37.8986555740248	RNASET2	ENSG00000026297
659	eqtl-a-ENSG00000026297	rs6911999	A	G	A	G	0.0741043	-0.0265552	0.331946	0.3633	FALSE	FALSE	FALSE	KIRC	167382698	0.486929	0.0381979	outcome	TRUE	reported	380248	378749	1499	6	167796186	0.0126234	4.35271267418099e-09	18378	NA	NA	eqtl-a-ENSG00000026297	TRUE	reported	eqtl-a-ENSG00000026297	rs6911999	4.35271267418099e-09	2	1	TRUE	0.0432648027107277	34.4614963064443	RNASET2	ENSG00000026297
660	eqtl-a-ENSG00000026297	rs6917940	T	A	T	A	0.158722	-0.0074318	0.844404	0.818331	FALSE	TRUE	FALSE	KIRC	166840235	0.876608	0.0478635	outcome	TRUE	reported	380248	378749	1499	6	167253723	0.0163654	3.05070349782252e-22	21935	NA	NA	eqtl-a-ENSG00000026297	TRUE	reported	eqtl-a-ENSG00000026297	rs6917940	3.05070349782252e-22	2	1	TRUE	0.0653479850321957	94.0634719961065	RNASET2	ENSG00000026297
661	eqtl-a-ENSG00000026297	rs6921101	A	G	A	G	0.0803391	0.0376749	0.414146	0.417229	FALSE	FALSE	FALSE	KIRC	167396283	0.323017	0.0381218	outcome	TRUE	reported	380248	378749	1499	6	167809771	0.012064	2.75296062615514e-11	17227	NA	NA	eqtl-a-ENSG00000026297	TRUE	reported	eqtl-a-ENSG00000026297	rs6921101	2.75296062615514e-11	2	1	TRUE	0.050675456153146	44.3477169948411	RNASET2	ENSG00000026297
662	eqtl-a-ENSG00000026297	rs6925969	A	C	A	C	-0.733988	-0.0355139	0.391329	0.396399	FALSE	FALSE	FALSE	KIRC	167088250	0.346342	0.0377122	outcome	TRUE	reported	380248	378749	1499	6	167501738	0.0105143	1e-200	20990	NA	NA	eqtl-a-ENSG00000026297	TRUE	reported	eqtl-a-ENSG00000026297	rs6925969	1e-200	2	1	TRUE	-0.434094	4873.23315826869	RNASET2	ENSG00000026297
663	eqtl-a-ENSG00000026297	rs71571466	A	G	A	G	-0.301539	-0.125964	0.0548859	0.0551627	FALSE	FALSE	FALSE	KIRC	166929279	0.121029	0.0812428	outcome	TRUE	reported	380248	378749	1499	6	167342767	0.0260084	4.4197733611558e-31	25471	NA	NA	eqtl-a-ENSG00000026297	TRUE	reported	eqtl-a-ENSG00000026297	rs71571466	4.4197733611558e-31	2	1	TRUE	-0.0724571	134.418705541177	RNASET2	ENSG00000026297
664	eqtl-a-ENSG00000026297	rs75413763	T	C	T	C	-0.0823669	-0.00530486	0.143366	0.230152	FALSE	FALSE	FALSE	KIRC	166637074	0.906176	0.0450086	outcome	TRUE	reported	380248	378749	1499	6	167050562	0.0169692	1.21001289895955e-06	23175	NA	NA	eqtl-a-ENSG00000026297	TRUE	reported	eqtl-a-ENSG00000026297	rs75413763	1.21001289895955e-06	2	1	TRUE	-0.0318698	23.5604024870388	RNASET2	ENSG00000026297
665	eqtl-a-ENSG00000026297	rs77233220	T	C	T	C	-0.357533	0.0440145	0.0289739	0.0392343	FALSE	FALSE	FALSE	KIRC	167410279	0.64233	0.0947682	outcome	TRUE	reported	380248	378749	1499	6	167823767	0.0353556	4.85735673287853e-24	21226	NA	NA	eqtl-a-ENSG00000026297	TRUE	reported	eqtl-a-ENSG00000026297	rs77233220	4.85735673287853e-24	2	1	TRUE	-0.0692469	102.262367367396	RNASET2	ENSG00000026297
666	eqtl-a-ENSG00000026297	rs77431743	T	C	T	C	0.373076	0.0213919	0.0738193	0.0982022	FALSE	FALSE	FALSE	KIRC	166910509	0.735345	0.0632852	outcome	TRUE	reported	380248	378749	1499	6	167323997	0.0225444	1.64399313622131e-61	22826	NA	NA	eqtl-a-ENSG00000026297	TRUE	reported	eqtl-a-ENSG00000026297	rs77431743	1.64399313622131e-61	2	1	TRUE	0.108886195869935	273.852847258526	RNASET2	ENSG00000026297
667	eqtl-a-ENSG00000026297	rs78488082	C	T	C	T	-0.260016	0.027112	0.0938842	0.127825	FALSE	FALSE	FALSE	KIRC	166851215	0.629624	0.0562191	outcome	TRUE	reported	380248	378749	1499	6	167264703	0.0202882	1.3304544179781e-37	23513	NA	NA	eqtl-a-ENSG00000026297	TRUE	reported	eqtl-a-ENSG00000026297	rs78488082	1.3304544179781e-37	2	1	TRUE	-0.0832931	164.252924546858	RNASET2	ENSG00000026297
668	eqtl-a-ENSG00000026297	rs78969709	A	C	A	C	-0.207972	0.0382826	0.0196802	0.033073	FALSE	FALSE	FALSE	KIRC	167293492	0.709782	0.102869	outcome	TRUE	reported	380248	378749	1499	6	167706980	0.0428137	1.18820123653046e-06	3252	NA	NA	eqtl-a-ENSG00000026297	TRUE	reported	eqtl-a-ENSG00000026297	rs78969709	1.18820123653046e-06	2	1	TRUE	-0.0849004	23.596316535767	RNASET2	ENSG00000026297
669	eqtl-a-ENSG00000026297	rs78991166	C	T	C	T	0.304704	-0.0988091	0.0477894	0.0717768	FALSE	FALSE	FALSE	KIRC	166849374	0.176786	0.0731531	outcome	TRUE	reported	380248	378749	1499	6	167262862	0.0277824	5.48276964920855e-28	20831	NA	NA	eqtl-a-ENSG00000026297	TRUE	reported	eqtl-a-ENSG00000026297	rs78991166	5.48276964920855e-28	2	1	TRUE	0.0757746218702974	120.286473121474	RNASET2	ENSG00000026297
670	eqtl-a-ENSG00000026297	rs845668	G	A	G	A	0.0676683	0.0323341	0.608441	0.587127	FALSE	FALSE	FALSE	KIRC	166808106	0.388207	0.0374726	outcome	TRUE	reported	380248	378749	1499	6	167221594	0.0121804	2.76662310781907e-08	26609	NA	NA	eqtl-a-ENSG00000026297	TRUE	reported	eqtl-a-ENSG00000026297	rs845668	2.76662310781907e-08	2	1	TRUE	0.0340387826346479	30.8636603414939	RNASET2	ENSG00000026297
671	eqtl-a-ENSG00000026297	rs877653	T	C	T	C	-0.09809	0.0279741	0.305736	0.304252	FALSE	FALSE	FALSE	KIRC	167340203	0.48402	0.0399715	outcome	TRUE	reported	380248	378749	1499	6	167753691	0.012892	2.76630460689751e-14	26271	NA	NA	eqtl-a-ENSG00000026297	TRUE	reported	eqtl-a-ENSG00000026297	rs877653	2.76630460689751e-14	2	1	TRUE	-0.0468926	57.8907099184047	RNASET2	ENSG00000026297
672	eqtl-a-ENSG00000026297	rs916331	G	T	G	T	-0.887139	-0.0441179	0.386593	0.388436	FALSE	FALSE	FALSE	KIRC	167057071	0.242526	0.0377497	outcome	TRUE	reported	380248	378749	1499	6	167470559	0.00967577	1e-200	26493	NA	NA	eqtl-a-ENSG00000026297	TRUE	reported	eqtl-a-ENSG00000026297	rs916331	1e-200	2	1	TRUE	-0.490805	8406.44297326939	RNASET2	ENSG00000026297
673	eqtl-a-ENSG00000026297	rs928344	T	A	T	A	0.142478	-0.00589599	0.348615	0.368414	FALSE	TRUE	FALSE	KIRC	167157942	0.87781	0.038349	outcome	TRUE	reported	380248	378749	1499	6	167571430	0.012432	2.08545104769316e-30	26601	NA	NA	eqtl-a-ENSG00000026297	TRUE	reported	eqtl-a-ENSG00000026297	rs928344	2.08545104769316e-30	2	1	TRUE	0.0700978223620809	131.345021964532	RNASET2	ENSG00000026297
674	eqtl-a-ENSG00000026297	rs9295387	G	A	G	A	0.182015	-0.0567075	0.423249	0.453668	FALSE	FALSE	FALSE	KIRC	167195114	0.128336	0.0372905	outcome	TRUE	reported	380248	378749	1499	6	167608602	0.0119484	2.12275562317734e-52	26156	NA	NA	eqtl-a-ENSG00000026297	TRUE	reported	eqtl-a-ENSG00000026297	rs9295387	2.12275562317734e-52	2	1	TRUE	0.0937799890952726	232.057096299409	RNASET2	ENSG00000026297
675	eqtl-a-ENSG00000026297	rs9406258	T	C	T	C	0.0927222	0.0180069	0.162293	0.215647	FALSE	FALSE	FALSE	KIRC	167462668	0.690865	0.0452798	outcome	TRUE	reported	380248	378749	1499	6	167874885	0.0161228	8.87176439795228e-09	13947	NA	NA	eqtl-a-ENSG00000026297	TRUE	reported	eqtl-a-ENSG00000026297	rs9406258	8.87176439795228e-09	2	1	TRUE	0.0486429150668792	33.0739847344898	RNASET2	ENSG00000026297
676	eqtl-a-ENSG00000026297	rs9457265	C	T	C	T	-0.84179	-0.0351361	0.407809	0.395637	FALSE	FALSE	FALSE	KIRC	167067321	0.350799	0.0376576	outcome	TRUE	reported	380248	378749	1499	6	167480809	0.00982228	1e-200	25984	NA	NA	eqtl-a-ENSG00000026297	TRUE	reported	eqtl-a-ENSG00000026297	rs9457265	1e-200	2	1	TRUE	-0.469455	7344.84954674685	RNASET2	ENSG00000026297
677	eqtl-a-ENSG00000026297	rs9459835	T	G	T	G	-0.95216	0.00849079	0.470159	0.431731	FALSE	FALSE	FALSE	KIRC	167004063	0.819346	0.0371773	outcome	TRUE	reported	380248	378749	1499	6	167417551	0.00883004	1e-200	26490	NA	NA	eqtl-a-ENSG00000026297	TRUE	reported	eqtl-a-ENSG00000026297	rs9459835	1e-200	2	1	TRUE	-0.552326	11627.7188951078	RNASET2	ENSG00000026297
678	eqtl-a-ENSG00000026297	rs9459923	T	G	T	G	0.290906	-0.0379962	0.437954	0.474574	FALSE	FALSE	FALSE	KIRC	167209797	0.305397	0.0370721	outcome	TRUE	reported	380248	378749	1499	6	167623285	0.0117437	1.83231442237123e-135	26271	NA	NA	eqtl-a-ENSG00000026297	TRUE	reported	eqtl-a-ENSG00000026297	rs9459923	1.83231442237123e-135	2	1	TRUE	0.151081740714005	613.614283939421	RNASET2	ENSG00000026297
679	eqtl-a-ENSG00000034510	rs1000919	T	C	T	C	-0.19605	-0.0356123	0.137759	0.13115	FALSE	FALSE	FALSE	KIRC	84869357	0.511721	0.0542737	outcome	TRUE	reported	380248	378749	1499	2	85096481	0.0171901	3.95730933929362e-30	14261	NA	NA	eqtl-a-ENSG00000034510	TRUE	reported	eqtl-a-ENSG00000034510	rs1000919	3.95730933929362e-30	2	1	TRUE	-0.0950763	130.069924165835	TMSB10	ENSG00000034510
680	eqtl-a-ENSG00000034510	rs10210248	T	C	T	C	0.0902487	0.0710519	0.793359	0.80084	FALSE	FALSE	FALSE	KIRC	84446128	0.122827	0.0460475	outcome	TRUE	reported	380248	378749	1499	2	84673252	0.0146798	7.84657264718223e-10	14263	NA	NA	eqtl-a-ENSG00000034510	TRUE	reported	eqtl-a-ENSG00000034510	rs10210248	7.84657264718223e-10	2	1	TRUE	0.0514127798566971	37.7956337662117	TMSB10	ENSG00000034510
681	eqtl-a-ENSG00000034510	rs11126968	C	G	C	G	0.175848	-0.117787	0.951307	0.962893	FALSE	TRUE	FALSE	KIRC	84563204	0.231235	0.0983863	outcome	TRUE	reported	380248	378749	1499	2	84790328	0.027614	1.91258171745921e-10	14262	NA	NA	eqtl-a-ENSG00000034510	TRUE	reported	eqtl-a-ENSG00000034510	rs11126968	1.91258171745921e-10	2	1	TRUE	0.0532514829312757	40.5523685744873	TMSB10	ENSG00000034510
682	eqtl-a-ENSG00000034510	rs115645653	G	A	G	A	-0.247252	0.109909	0.0165385	0.0211225	FALSE	FALSE	FALSE	KIRC	84952802	0.392023	0.128405	outcome	TRUE	reported	380248	378749	1499	2	85179925	0.0466214	1.13671083588832e-07	6587	NA	NA	eqtl-a-ENSG00000034510	TRUE	reported	eqtl-a-ENSG00000034510	rs115645653	1.13671083588832e-07	2	1	TRUE	-0.0652155	28.1260668577244	TMSB10	ENSG00000034510
683	eqtl-a-ENSG00000034510	rs115940339	A	G	A	G	-0.178671	0.114942	0.0458739	0.037108	FALSE	FALSE	FALSE	KIRC	84628993	0.242496	0.0983447	outcome	TRUE	reported	380248	378749	1499	2	84856117	0.0284087	3.18698485756684e-10	14263	NA	NA	eqtl-a-ENSG00000034510	TRUE	reported	eqtl-a-ENSG00000034510	rs115940339	3.18698485756684e-10	2	1	TRUE	-0.0525928	39.555366701851	TMSB10	ENSG00000034510
684	eqtl-a-ENSG00000034510	rs1159790	C	T	C	T	0.0907246	0.0711161	0.792972	0.800842	FALSE	FALSE	FALSE	KIRC	84458765	0.122537	0.0460534	outcome	TRUE	reported	380248	378749	1499	2	84685889	0.0146694	6.22601266797654e-10	14263	NA	NA	eqtl-a-ENSG00000034510	TRUE	reported	eqtl-a-ENSG00000034510	rs1159790	6.22601266797654e-10	2	1	TRUE	0.0517197110198313	38.2494700500813	TMSB10	ENSG00000034510
685	eqtl-a-ENSG00000034510	rs11691074	C	T	C	T	-0.179298	0.109841	0.0476405	0.036975	FALSE	FALSE	FALSE	KIRC	84640742	0.264984	0.0985396	outcome	TRUE	reported	380248	378749	1499	2	84867866	0.0279011	1.3083080090036e-10	14263	NA	NA	eqtl-a-ENSG00000034510	TRUE	reported	eqtl-a-ENSG00000034510	rs11691074	1.3083080090036e-10	2	1	TRUE	-0.0537343	41.296023951493	TMSB10	ENSG00000034510
686	eqtl-a-ENSG00000034510	rs11695649	G	T	G	T	-0.165228	0.0929743	0.0456241	0.0361516	FALSE	FALSE	FALSE	KIRC	84342328	0.350564	0.099598	outcome	TRUE	reported	380248	378749	1499	2	84569452	0.0284886	6.63147291238429e-09	14260	NA	NA	eqtl-a-ENSG00000034510	TRUE	reported	eqtl-a-ENSG00000034510	rs11695649	6.63147291238429e-09	2	1	TRUE	-0.0485145	33.6376058217541	TMSB10	ENSG00000034510
687	eqtl-a-ENSG00000034510	rs11891970	A	C	A	C	0.182574	-0.117679	0.95557	0.962893	FALSE	FALSE	FALSE	KIRC	84573481	0.231663	0.0983869	outcome	TRUE	reported	380248	378749	1499	2	84800605	0.0288444	2.45798936788936e-10	14263	NA	NA	eqtl-a-ENSG00000034510	TRUE	reported	eqtl-a-ENSG00000034510	rs11891970	2.45798936788936e-10	2	1	TRUE	0.0529289459349077	40.0640493501226	TMSB10	ENSG00000034510
688	eqtl-a-ENSG00000034510	rs11904045	T	G	T	G	-0.162755	0.109358	0.0493341	0.0376345	FALSE	FALSE	FALSE	KIRC	84391458	0.263072	0.0977146	outcome	TRUE	reported	380248	378749	1499	2	84618582	0.0274484	3.03668678846579e-09	14263	NA	NA	eqtl-a-ENSG00000034510	TRUE	reported	eqtl-a-ENSG00000034510	rs11904045	3.03668678846579e-09	2	1	TRUE	-0.0495915	35.1588459069715	TMSB10	ENSG00000034510
689	eqtl-a-ENSG00000034510	rs1192270	C	G	C	G	-0.193101	0.0875325	0.0508933	0.0376924	FALSE	TRUE	FALSE	KIRC	84701659	0.369717	0.0975833	outcome	TRUE	reported	380248	378749	1499	2	84928783	0.0270317	9.09075597360196e-13	13755	NA	NA	eqtl-a-ENSG00000034510	TRUE	reported	eqtl-a-ENSG00000034510	rs1192270	9.09075597360196e-13	2	1	TRUE	-0.0608007	51.0296192313384	TMSB10	ENSG00000034510
690	eqtl-a-ENSG00000034510	rs1192300	A	G	A	G	-0.197703	0.0875336	0.0479742	0.0376923	FALSE	FALSE	FALSE	KIRC	84691523	0.369712	0.0975833	outcome	TRUE	reported	380248	378749	1499	2	84918647	0.0277997	1.14551294144553e-12	14263	NA	NA	eqtl-a-ENSG00000034510	TRUE	reported	eqtl-a-ENSG00000034510	rs1192300	1.14551294144553e-12	2	1	TRUE	-0.0594469	50.5762121728523	TMSB10	ENSG00000034510
691	eqtl-a-ENSG00000034510	rs1192311	A	G	A	G	-0.107319	-0.0287565	0.129595	0.143855	FALSE	FALSE	FALSE	KIRC	84792207	0.580981	0.0520995	outcome	TRUE	reported	380248	378749	1499	2	85019331	0.017698	1.32779185423414e-09	14263	NA	NA	eqtl-a-ENSG00000034510	TRUE	reported	eqtl-a-ENSG00000034510	rs1192311	1.32779185423414e-09	2	1	TRUE	-0.0507129	36.7709502288372	TMSB10	ENSG00000034510
692	eqtl-a-ENSG00000034510	rs1192329	A	T	A	T	-0.191682	0.0954352	0.0507224	0.0377144	FALSE	TRUE	FALSE	KIRC	84728467	0.328252	0.097618	outcome	TRUE	reported	380248	378749	1499	2	84955591	0.0270756	1.44577263387363e-12	14263	NA	NA	eqtl-a-ENSG00000034510	TRUE	reported	eqtl-a-ENSG00000034510	rs1192329	1.44577263387363e-12	2	1	TRUE	-0.0591788	50.1194717990442	TMSB10	ENSG00000034510
693	eqtl-a-ENSG00000034510	rs1192359	C	T	C	T	-0.102027	-0.0157851	0.190288	0.174353	FALSE	FALSE	FALSE	KIRC	84814192	0.74413	0.0483628	outcome	TRUE	reported	380248	378749	1499	2	85041316	0.0151382	1.58598837611228e-11	14263	NA	NA	eqtl-a-ENSG00000034510	TRUE	reported	eqtl-a-ENSG00000034510	rs1192359	1.58598837611228e-11	2	1	TRUE	-0.0563476	45.4236215004901	TMSB10	ENSG00000034510
694	eqtl-a-ENSG00000034510	rs1192377	T	G	T	G	-0.10776	-0.0171649	0.195289	0.174343	FALSE	FALSE	FALSE	KIRC	84780034	0.722723	0.048376	outcome	TRUE	reported	380248	378749	1499	2	85007158	0.0149862	6.44169265515176e-13	14263	NA	NA	eqtl-a-ENSG00000034510	TRUE	reported	eqtl-a-ENSG00000034510	rs1192377	6.44169265515176e-13	2	1	TRUE	-0.0601043	51.7049493437233	TMSB10	ENSG00000034510
695	eqtl-a-ENSG00000034510	rs1192385	G	A	G	A	-0.198954	0.0955373	0.0509187	0.0377084	FALSE	FALSE	FALSE	KIRC	84761367	0.327742	0.0976193	outcome	TRUE	reported	380248	378749	1499	2	84988491	0.0270223	1.80094313444192e-13	14263	NA	NA	eqtl-a-ENSG00000034510	TRUE	reported	eqtl-a-ENSG00000034510	rs1192385	1.80094313444192e-13	2	1	TRUE	-0.0615363	54.2076684290073	TMSB10	ENSG00000034510
696	eqtl-a-ENSG00000034510	rs12477740	G	A	G	A	-0.19748	-0.0459229	0.0992403	0.10891	FALSE	FALSE	FALSE	KIRC	84904611	0.435232	0.0588551	outcome	TRUE	reported	380248	378749	1499	2	85131735	0.019837	2.39331575640539e-23	14263	NA	NA	eqtl-a-ENSG00000034510	TRUE	reported	eqtl-a-ENSG00000034510	rs12477740	2.39331575640539e-23	2	1	TRUE	-0.0830746	99.104699825227	TMSB10	ENSG00000034510
697	eqtl-a-ENSG00000034510	rs13006052	A	G	A	G	0.0916963	0.0718253	0.79267	0.800784	FALSE	FALSE	FALSE	KIRC	84469990	0.118781	0.0460445	outcome	TRUE	reported	380248	378749	1499	2	84697114	0.0146611	3.99052466977936e-10	14263	NA	NA	eqtl-a-ENSG00000034510	TRUE	reported	eqtl-a-ENSG00000034510	rs13006052	3.99052466977936e-10	2	1	TRUE	0.0523016576732571	39.1174478280336	TMSB10	ENSG00000034510
698	eqtl-a-ENSG00000034510	rs1455021	G	C	G	C	-0.147425	0.0803094	0.0519876	0.0386298	FALSE	TRUE	FALSE	KIRC	84330772	0.410803	0.0976428	outcome	TRUE	reported	380248	378749	1499	2	84557896	0.0267807	3.69173058856102e-08	14249	NA	NA	eqtl-a-ENSG00000034510	TRUE	reported	eqtl-a-ENSG00000034510	rs1455021	3.69173058856102e-08	2	1	TRUE	-0.0460708	30.3038930000189	TMSB10	ENSG00000034510
699	eqtl-a-ENSG00000034510	rs146032849	G	A	G	A	-0.164549	0.103937	0.0479732	0.0378188	FALSE	FALSE	FALSE	KIRC	84402895	0.285824	0.0973804	outcome	TRUE	reported	380248	378749	1499	2	84630019	0.0278152	3.30270664318788e-09	14262	NA	NA	eqtl-a-ENSG00000034510	TRUE	reported	eqtl-a-ENSG00000034510	rs146032849	3.30270664318788e-09	2	1	TRUE	-0.049479	34.996621513647	TMSB10	ENSG00000034510
700	eqtl-a-ENSG00000034510	rs1460699	G	A	G	A	0.174922	-0.115483	0.951345	0.962896	FALSE	FALSE	FALSE	KIRC	84538248	0.240517	0.0983926	outcome	TRUE	reported	380248	378749	1499	2	84765372	0.0276247	2.41690733646058e-10	14262	NA	NA	eqtl-a-ENSG00000034510	TRUE	reported	eqtl-a-ENSG00000034510	rs1460699	2.41690733646058e-10	2	1	TRUE	0.0529513939821705	40.095324056936	TMSB10	ENSG00000034510
701	eqtl-a-ENSG00000034510	rs1467996	T	C	T	C	0.175654	-0.108291	0.952226	0.962913	FALSE	FALSE	FALSE	KIRC	84491307	0.270985	0.0983748	outcome	TRUE	reported	380248	378749	1499	2	84718431	0.0278657	2.90442388773646e-10	14263	NA	NA	eqtl-a-ENSG00000034510	TRUE	reported	eqtl-a-ENSG00000034510	rs1467996	2.90442388773646e-10	2	1	TRUE	0.0527119282239941	39.7352704762618	TMSB10	ENSG00000034510
702	eqtl-a-ENSG00000034510	rs1473411	T	A	T	A	0.142977	-0.12953	0.937299	0.956527	FALSE	TRUE	FALSE	KIRC	84481266	0.154934	0.09107	outcome	TRUE	reported	380248	378749	1499	2	84708390	0.0245214	5.51619995000268e-09	14261	NA	NA	eqtl-a-ENSG00000034510	TRUE	reported	eqtl-a-ENSG00000034510	rs1473411	5.51619995000268e-09	2	1	TRUE	0.0487707310837918	33.997097215409	TMSB10	ENSG00000034510
703	eqtl-a-ENSG00000034510	rs1620692	T	G	T	G	-0.110549	-0.0158128	0.189749	0.174342	FALSE	FALSE	FALSE	KIRC	84802759	0.74368	0.0483593	outcome	TRUE	reported	380248	378749	1499	2	85029883	0.0151505	2.94713479560874e-13	13922	NA	NA	eqtl-a-ENSG00000034510	TRUE	reported	eqtl-a-ENSG00000034510	rs1620692	2.94713479560874e-13	2	1	TRUE	-0.0617276	53.2421647938343	TMSB10	ENSG00000034510
704	eqtl-a-ENSG00000034510	rs1649291	A	G	A	G	-0.131004	-0.0179171	0.164226	0.16363	FALSE	FALSE	FALSE	KIRC	84825684	0.717827	0.0495819	outcome	TRUE	reported	380248	378749	1499	2	85052808	0.0160271	2.98332110176817e-16	14263	NA	NA	eqtl-a-ENSG00000034510	TRUE	reported	eqtl-a-ENSG00000034510	rs1649291	2.98332110176817e-16	2	1	TRUE	-0.0682873	66.8127302670904	TMSB10	ENSG00000034510
705	eqtl-a-ENSG00000034510	rs1728057	C	T	C	T	-0.192771	0.0874772	0.0504475	0.0376941	FALSE	FALSE	FALSE	KIRC	84713274	0.370022	0.0975838	outcome	TRUE	reported	380248	378749	1499	2	84940398	0.027145	1.23310483322891e-12	14263	NA	NA	eqtl-a-ENSG00000034510	TRUE	reported	eqtl-a-ENSG00000034510	rs1728057	1.23310483322891e-12	2	1	TRUE	-0.0593622	50.4317116760474	TMSB10	ENSG00000034510
706	eqtl-a-ENSG00000034510	rs1841420	G	T	G	T	0.173521	-0.115054	0.952006	0.962898	FALSE	FALSE	FALSE	KIRC	84608679	0.242025	0.0983417	outcome	TRUE	reported	380248	378749	1499	2	84835803	0.0278057	4.35903142568392e-10	14263	NA	NA	eqtl-a-ENSG00000034510	TRUE	reported	eqtl-a-ENSG00000034510	rs1841420	4.35903142568392e-10	2	1	TRUE	0.05218564388771	38.9436289022952	TMSB10	ENSG00000034510
707	eqtl-a-ENSG00000034510	rs1881095	G	A	G	A	0.188624	-0.109247	0.954676	0.963016	FALSE	FALSE	FALSE	KIRC	84670393	0.267416	0.0985065	outcome	TRUE	reported	380248	378749	1499	2	84897517	0.0285681	4.0345955018983e-11	14263	NA	NA	eqtl-a-ENSG00000034510	TRUE	reported	eqtl-a-ENSG00000034510	rs1881095	4.0345955018983e-11	2	1	TRUE	0.0552049242348647	43.5944483003792	TMSB10	ENSG00000034510
708	eqtl-a-ENSG00000034510	rs1918686	G	C	G	C	0.183585	-0.109902	0.952693	0.962982	FALSE	TRUE	FALSE	KIRC	84659915	0.264595	0.0985139	outcome	TRUE	reported	380248	378749	1499	2	84887039	0.0279927	5.43876131720408e-11	14263	NA	NA	eqtl-a-ENSG00000034510	TRUE	reported	eqtl-a-ENSG00000034510	rs1918686	5.43876131720408e-11	2	1	TRUE	0.0548357109361583	43.0115217385239	TMSB10	ENSG00000034510
709	eqtl-a-ENSG00000034510	rs192471306	A	G	A	G	-0.165369	0.0923619	0.0466272	0.0361641	FALSE	FALSE	FALSE	KIRC	84359002	0.353567	0.099561	outcome	TRUE	reported	380248	378749	1499	2	84586126	0.0281945	4.48053629792165e-09	14263	NA	NA	eqtl-a-ENSG00000034510	TRUE	reported	eqtl-a-ENSG00000034510	rs192471306	4.48053629792165e-09	2	1	TRUE	-0.0490559	34.4016605244259	TMSB10	ENSG00000034510
710	eqtl-a-ENSG00000034510	rs2124178	G	A	G	A	0.144814	-0.116142	0.962822	0.973172	FALSE	FALSE	FALSE	KIRC	84291508	0.308571	0.114063	outcome	TRUE	reported	380248	378749	1499	2	84518632	0.0314342	4.08516874003473e-06	14263	NA	NA	eqtl-a-ENSG00000034510	TRUE	reported	eqtl-a-ENSG00000034510	rs2124178	4.08516874003473e-06	2	1	TRUE	0.0385487434016712	21.2234643033136	TMSB10	ENSG00000034510
711	eqtl-a-ENSG00000034510	rs2557774	G	A	G	A	-0.196617	0.0955373	0.0509383	0.0377084	FALSE	FALSE	FALSE	KIRC	84746578	0.327742	0.0976193	outcome	TRUE	reported	380248	378749	1499	2	84973702	0.0270185	3.40800324800365e-13	14263	NA	NA	eqtl-a-ENSG00000034510	TRUE	reported	eqtl-a-ENSG00000034510	rs2557774	3.40800324800365e-13	2	1	TRUE	-0.0608247	52.9565472892726	TMSB10	ENSG00000034510
712	eqtl-a-ENSG00000034510	rs2886210	A	C	A	C	-0.16555	0.109471	0.0460309	0.0376261	FALSE	FALSE	FALSE	KIRC	84378533	0.262781	0.0977556	outcome	TRUE	reported	380248	378749	1499	2	84605657	0.028368	5.34687461561607e-09	14263	NA	NA	eqtl-a-ENSG00000034510	TRUE	reported	eqtl-a-ENSG00000034510	rs2886210	5.34687461561607e-09	2	1	TRUE	-0.0488099	34.0565721727476	TMSB10	ENSG00000034510
713	eqtl-a-ENSG00000034510	rs34485446	A	G	A	G	-0.13126	-0.0693858	0.157325	0.210929	FALSE	FALSE	FALSE	KIRC	84845558	0.127133	0.0454838	outcome	TRUE	reported	380248	378749	1499	2	85072682	0.0163088	8.37529282126883e-16	14263	NA	NA	eqtl-a-ENSG00000034510	TRUE	reported	eqtl-a-ENSG00000034510	rs34485446	8.37529282126883e-16	2	1	TRUE	-0.0672437	64.776993337427	TMSB10	ENSG00000034510
714	eqtl-a-ENSG00000034510	rs4428022	G	A	G	A	0.166034	-0.103932	0.954008	0.962181	FALSE	FALSE	FALSE	KIRC	84435809	0.285939	0.0973989	outcome	TRUE	reported	380248	378749	1499	2	84662933	0.0283794	4.89801375035973e-09	14263	NA	NA	eqtl-a-ENSG00000034510	TRUE	reported	eqtl-a-ENSG00000034510	rs4428022	4.89801375035973e-09	2	1	TRUE	0.0489325975905188	34.2284823117742	TMSB10	ENSG00000034510
715	eqtl-a-ENSG00000034510	rs4599134	A	G	A	G	0.170349	-0.111702	0.953009	0.962906	FALSE	FALSE	FALSE	KIRC	84504458	0.256284	0.098397	outcome	TRUE	reported	380248	378749	1499	2	84731582	0.0280881	1.31950183949798e-09	11496	NA	NA	eqtl-a-ENSG00000034510	TRUE	reported	eqtl-a-ENSG00000034510	rs4599134	1.31950183949798e-09	2	1	TRUE	0.0564791102643907	36.7819247577299	TMSB10	ENSG00000034510
716	eqtl-a-ENSG00000034510	rs4641948	C	T	C	T	0.17379	-0.115151	0.951986	0.962957	FALSE	FALSE	FALSE	KIRC	84597093	0.242295	0.0984814	outcome	TRUE	reported	380248	378749	1499	2	84824217	0.0278001	4.06789748741288e-10	14263	NA	NA	eqtl-a-ENSG00000034510	TRUE	reported	eqtl-a-ENSG00000034510	rs4641948	4.06789748741288e-10	2	1	TRUE	0.0522768232317495	39.0802065287264	TMSB10	ENSG00000034510
717	eqtl-a-ENSG00000034510	rs4831968	A	G	A	G	0.16574	-0.103678	0.953969	0.962181	FALSE	FALSE	FALSE	KIRC	84420340	0.287116	0.0973985	outcome	TRUE	reported	380248	378749	1499	2	84647464	0.028368	5.13925302283488e-09	14263	NA	NA	eqtl-a-ENSG00000034510	TRUE	reported	eqtl-a-ENSG00000034510	rs4831968	5.13925302283488e-09	2	1	TRUE	0.0488657410114248	34.1347897736906	TMSB10	ENSG00000034510
718	eqtl-a-ENSG00000034510	rs6707496	C	T	C	T	0.176512	-0.115908	0.951345	0.962895	FALSE	FALSE	FALSE	KIRC	84551979	0.238781	0.0983906	outcome	TRUE	reported	380248	378749	1499	2	84779103	0.027624	1.66100140572473e-10	14262	NA	NA	eqtl-a-ENSG00000034510	TRUE	reported	eqtl-a-ENSG00000034510	rs6707496	1.66100140572473e-10	2	1	TRUE	0.0534326919070521	40.829620280916	TMSB10	ENSG00000034510
719	eqtl-a-ENSG00000034510	rs6749290	G	A	G	A	0.196313	-0.0875397	0.952183	0.962308	FALSE	FALSE	FALSE	KIRC	84680425	0.369681	0.097584	outcome	TRUE	reported	380248	378749	1499	2	84907549	0.0278438	1.78155814066289e-12	14263	NA	NA	eqtl-a-ENSG00000034510	TRUE	reported	eqtl-a-ENSG00000034510	rs6749290	1.78155814066289e-12	2	1	TRUE	0.0589372636356719	49.7096961532561	TMSB10	ENSG00000034510
720	eqtl-a-ENSG00000034510	rs6757181	C	A	C	A	0.17977	-0.115054	0.954126	0.962898	FALSE	FALSE	FALSE	KIRC	84587059	0.242025	0.0983417	outcome	TRUE	reported	380248	378749	1499	2	84814183	0.0284082	2.48039016125105e-10	14263	NA	NA	eqtl-a-ENSG00000034510	TRUE	reported	eqtl-a-ENSG00000034510	rs6757181	2.48039016125105e-10	2	1	TRUE	0.0529163178926421	40.0448806087457	TMSB10	ENSG00000034510
721	eqtl-a-ENSG00000034510	rs7580136	T	A	T	A	0.172567	-0.115484	0.952774	0.962896	FALSE	TRUE	FALSE	KIRC	84524658	0.240515	0.0983927	outcome	TRUE	reported	380248	378749	1499	2	84751782	0.0280205	7.32976414051825e-10	11496	NA	NA	eqtl-a-ENSG00000034510	TRUE	reported	eqtl-a-ENSG00000034510	rs7580136	7.32976414051825e-10	2	1	TRUE	0.057349667091575	37.9283314096434	TMSB10	ENSG00000034510
722	eqtl-a-ENSG00000034510	rs75893711	C	T	C	T	-0.19188	-0.0333416	0.139333	0.130246	FALSE	FALSE	FALSE	KIRC	84883273	0.540489	0.0544731	outcome	TRUE	reported	380248	378749	1499	2	85110397	0.0171109	3.480967752324e-29	14263	NA	NA	eqtl-a-ENSG00000034510	TRUE	reported	eqtl-a-ENSG00000034510	rs75893711	3.480967752324e-29	2	1	TRUE	-0.0934922	125.751656089357	TMSB10	ENSG00000034510
723	eqtl-a-ENSG00000034510	rs7593934	C	T	C	T	-0.190385	-0.0295133	0.140708	0.133196	FALSE	FALSE	FALSE	KIRC	84858914	0.584836	0.0540207	outcome	TRUE	reported	380248	378749	1499	2	85086038	0.0170413	5.59113527570558e-29	14260	NA	NA	eqtl-a-ENSG00000034510	TRUE	reported	eqtl-a-ENSG00000034510	rs7593934	5.59113527570558e-29	2	1	TRUE	-0.0931554	124.813054813328	TMSB10	ENSG00000034510
724	eqtl-a-ENSG00000034510	rs78649554	A	G	A	G	-0.137834	0.0750707	0.0469027	0.0308851	FALSE	FALSE	FALSE	KIRC	84319858	0.483466	0.107131	outcome	TRUE	reported	380248	378749	1499	2	84546982	0.028126	9.55432477640949e-07	14263	NA	NA	eqtl-a-ENSG00000034510	TRUE	reported	eqtl-a-ENSG00000034510	rs78649554	9.55432477640949e-07	2	1	TRUE	-0.0410023	24.0157843204629	TMSB10	ENSG00000034510
725	eqtl-a-ENSG00000034510	rs9973762	T	C	T	C	0.144599	-0.109846	0.962779	0.973006	FALSE	FALSE	FALSE	KIRC	84257328	0.334197	0.113748	outcome	TRUE	reported	380248	378749	1499	2	84484452	0.0314169	4.17253511231794e-06	14261	NA	NA	eqtl-a-ENSG00000034510	TRUE	reported	eqtl-a-ENSG00000034510	rs9973762	4.17253511231794e-06	2	1	TRUE	0.0385154575220862	21.1838025451103	TMSB10	ENSG00000034510
726	eqtl-a-ENSG00000038945	rs1030517	A	G	A	G	-0.224694	-0.0566305	0.167068	0.131955	FALSE	FALSE	FALSE	KIRC	16330801	0.300509	0.0546974	outcome	TRUE	reported	380248	378749	1499	8	16188310	0.0158424	1.1641260294105e-45	31470	NA	NA	eqtl-a-ENSG00000038945	TRUE	reported	eqtl-a-ENSG00000038945	rs1030517	1.1641260294105e-45	2	1	TRUE	-0.0796989	201.159710672851	MSR1	ENSG00000038945
727	eqtl-a-ENSG00000038945	rs111650480	T	C	T	C	-0.207412	-0.135003	0.0194073	0.00786125	FALSE	FALSE	FALSE	KIRC	16449555	0.511531	0.205654	outcome	TRUE	reported	380248	378749	1499	8	16307064	0.0431084	1.49730405243483e-06	20551	NA	NA	eqtl-a-ENSG00000038945	TRUE	reported	eqtl-a-ENSG00000038945	rs111650480	1.49730405243483e-06	2	1	TRUE	-0.0335453	23.1496244800948	MSR1	ENSG00000038945
728	eqtl-a-ENSG00000038945	rs113034784	A	G	A	G	-0.106968	-0.0357441	0.272935	0.328718	FALSE	FALSE	FALSE	KIRC	16425975	0.367597	0.0396723	outcome	TRUE	reported	380248	378749	1499	8	16283484	0.0133303	1.01859138805411e-15	26487	NA	NA	eqtl-a-ENSG00000038945	TRUE	reported	eqtl-a-ENSG00000038945	rs113034784	1.01859138805411e-15	2	1	TRUE	-0.0492478	64.3914055168525	MSR1	ENSG00000038945
729	eqtl-a-ENSG00000038945	rs117634669	G	T	G	T	-0.31617	0.161493	0.027978	0.0239454	FALSE	FALSE	FALSE	KIRC	16243860	0.183945	0.121542	outcome	TRUE	reported	380248	378749	1499	8	16101369	0.0359927	1.57217179246294e-18	25252	NA	NA	eqtl-a-ENSG00000038945	TRUE	reported	eqtl-a-ENSG00000038945	rs117634669	1.57217179246294e-18	2	1	TRUE	-0.0551967	77.1635972026556	MSR1	ENSG00000038945
730	eqtl-a-ENSG00000038945	rs11779564	G	A	G	A	-0.524741	-0.0573946	0.429877	0.452278	FALSE	FALSE	FALSE	KIRC	16539666	0.1235	0.0372632	outcome	TRUE	reported	380248	378749	1499	8	16397175	0.0111816	1e-200	31350	NA	NA	eqtl-a-ENSG00000038945	TRUE	reported	eqtl-a-ENSG00000038945	rs11779564	1e-200	2	1	TRUE	-0.256208	2202.32846908875	MSR1	ENSG00000038945
731	eqtl-a-ENSG00000038945	rs11785751	A	G	A	G	0.0912035	-0.0238262	0.817205	0.854306	FALSE	FALSE	FALSE	KIRC	16478183	0.650417	0.0525755	outcome	TRUE	reported	380248	378749	1499	8	16335692	0.01538	3.02572880659488e-09	31470	NA	NA	eqtl-a-ENSG00000038945	TRUE	reported	eqtl-a-ENSG00000038945	rs11785751	3.02572880659488e-09	2	1	TRUE	0.0334101230979585	35.1649771131762	MSR1	ENSG00000038945
732	eqtl-a-ENSG00000038945	rs12718375	G	A	G	A	0.166733	0.0165973	0.88576	0.88693	FALSE	FALSE	FALSE	KIRC	16139288	0.774064	0.0578178	outcome	TRUE	reported	380248	378749	1499	8	15996797	0.0186575	4.01328498262742e-19	27165	NA	NA	eqtl-a-ENSG00000038945	TRUE	reported	eqtl-a-ENSG00000038945	rs12718375	4.01328498262742e-19	2	1	TRUE	0.0541429300428517	79.8612729357636	MSR1	ENSG00000038945
733	eqtl-a-ENSG00000038945	rs13252764	A	C	A	C	0.218192	-0.00374978	0.491061	0.467749	FALSE	FALSE	FALSE	KIRC	16759907	0.91927	0.0369969	outcome	TRUE	reported	380248	378749	1499	8	16617416	0.0117629	8.30806718701913e-77	30648	NA	NA	eqtl-a-ENSG00000038945	TRUE	reported	eqtl-a-ENSG00000038945	rs13252764	8.30806718701913e-77	2	1	TRUE	0.105369065483522	344.071607418776	MSR1	ENSG00000038945
734	eqtl-a-ENSG00000038945	rs13260029	T	C	T	C	0.425773	0.0691148	0.49769	0.513064	FALSE	FALSE	FALSE	KIRC	16560220	0.0618458	0.0370111	outcome	TRUE	reported	380248	378749	1499	8	16417729	0.0113513	1e-200	31047	NA	NA	eqtl-a-ENSG00000038945	TRUE	reported	eqtl-a-ENSG00000038945	rs13260029	1e-200	2	1	TRUE	0.208215191328626	1406.90583834376	MSR1	ENSG00000038945
735	eqtl-a-ENSG00000038945	rs13265255	C	T	C	T	0.240166	0.015677	0.34311	0.371362	FALSE	FALSE	FALSE	KIRC	16728845	0.683611	0.0384673	outcome	TRUE	reported	380248	378749	1499	8	16586354	0.0123726	6.23017147429063e-84	30688	NA	NA	eqtl-a-ENSG00000038945	TRUE	reported	eqtl-a-ENSG00000038945	rs13265255	6.23017147429063e-84	2	1	TRUE	0.110136256642701	376.79150650696	MSR1	ENSG00000038945
736	eqtl-a-ENSG00000038945	rs13271331	A	G	A	G	0.287627	0.156805	0.0172911	0.00982152	FALSE	FALSE	FALSE	KIRC	16404786	0.390073	0.182441	outcome	TRUE	reported	380248	378749	1499	8	16262295	0.0455942	2.81929161703276e-10	12495	NA	NA	eqtl-a-ENSG00000038945	TRUE	reported	eqtl-a-ENSG00000038945	rs13271331	2.81929161703276e-10	2	1	TRUE	0.0563502782943629	39.796062401618	MSR1	ENSG00000038945
737	eqtl-a-ENSG00000038945	rs13273080	G	A	G	A	0.240231	0.109079	0.0189769	0.0178485	FALSE	FALSE	FALSE	KIRC	15834191	0.421311	0.135645	outcome	TRUE	reported	380248	378749	1499	8	15691700	0.0435738	3.52370871042487e-08	28416	NA	NA	eqtl-a-ENSG00000038945	TRUE	reported	eqtl-a-ENSG00000038945	rs13273080	3.52370871042487e-08	2	1	TRUE	0.0326892728586381	30.3953554737299	MSR1	ENSG00000038945
738	eqtl-a-ENSG00000038945	rs1405292	G	A	G	A	-0.152531	0.0355179	0.964543	0.969617	FALSE	FALSE	FALSE	KIRC	16437525	0.745344	0.109359	outcome	TRUE	reported	380248	378749	1499	8	16295034	0.0321578	2.10581395799539e-06	30963	NA	NA	eqtl-a-ENSG00000038945	TRUE	reported	eqtl-a-ENSG00000038945	rs1405292	2.10581395799539e-06	2	1	TRUE	-0.0269468	22.4979825362369	MSR1	ENSG00000038945
739	eqtl-a-ENSG00000038945	rs144871884	T	C	T	C	-0.285968	-0.039773	0.0230124	0.0382737	FALSE	FALSE	FALSE	KIRC	16316304	0.694837	0.101384	outcome	TRUE	reported	380248	378749	1499	8	16173813	0.0396204	5.28323586766999e-13	24068	NA	NA	eqtl-a-ENSG00000038945	TRUE	reported	eqtl-a-ENSG00000038945	rs144871884	5.28323586766999e-13	2	1	TRUE	-0.0464758	52.0951346017087	MSR1	ENSG00000038945
740	eqtl-a-ENSG00000038945	rs146287641	C	T	C	T	-0.174448	-0.0885018	0.0277483	0.0559731	FALSE	FALSE	FALSE	KIRC	16461922	0.277266	0.0814572	outcome	TRUE	reported	380248	378749	1499	8	16319431	0.036206	1.44860506712229e-06	26734	NA	NA	eqtl-a-ENSG00000038945	TRUE	reported	eqtl-a-ENSG00000038945	rs146287641	1.44860506712229e-06	2	1	TRUE	-0.0294565	23.2151179916671	MSR1	ENSG00000038945
741	eqtl-a-ENSG00000038945	rs150624251	T	G	T	G	0.323792	0.0639699	0.0234795	0.0428966	FALSE	FALSE	FALSE	KIRC	16504699	0.493852	0.0934966	outcome	TRUE	reported	380248	378749	1499	8	16362208	0.0392114	1.48867535949237e-16	18278	NA	NA	eqtl-a-ENSG00000038945	TRUE	reported	eqtl-a-ENSG00000038945	rs150624251	1.48867535949237e-16	2	1	TRUE	0.0609683610152258	68.187933904161	MSR1	ENSG00000038945
742	eqtl-a-ENSG00000038945	rs1526439	G	T	G	T	0.212741	0.0974535	0.51869	0.476817	FALSE	FALSE	FALSE	KIRC	16489034	0.00838649	0.0369689	outcome	TRUE	reported	380248	378749	1499	8	16346543	0.0117765	6.01173737483273e-73	25487	NA	NA	eqtl-a-ENSG00000038945	TRUE	reported	eqtl-a-ENSG00000038945	rs1526439	6.01173737483273e-73	2	1	TRUE	0.112442291219962	326.339707423396	MSR1	ENSG00000038945
743	eqtl-a-ENSG00000038945	rs1533897	T	C	T	C	-0.312959	-0.0529762	0.361549	0.416417	FALSE	FALSE	FALSE	KIRC	16668545	0.157432	0.0374719	outcome	TRUE	reported	380248	378749	1499	8	16526054	0.0121046	2.1478304741305e-147	31347	NA	NA	eqtl-a-ENSG00000038945	TRUE	reported	eqtl-a-ENSG00000038945	rs1533897	2.1478304741305e-147	2	1	TRUE	-0.144501	668.457815807506	MSR1	ENSG00000038945
744	eqtl-a-ENSG00000038945	rs1540414	A	G	A	G	-0.264002	0.0620086	0.935109	0.954337	FALSE	FALSE	FALSE	KIRC	16354969	0.487477	0.0893074	outcome	TRUE	reported	380248	378749	1499	8	16212478	0.024059	5.15347294020903e-28	29749	NA	NA	eqtl-a-ENSG00000038945	TRUE	reported	eqtl-a-ENSG00000038945	rs1540414	5.15347294020903e-28	2	1	TRUE	-0.0634937	120.409094279416	MSR1	ENSG00000038945
745	eqtl-a-ENSG00000038945	rs1554745	C	T	C	T	-0.639123	0.0765631	0.981677	0.986431	FALSE	FALSE	FALSE	KIRC	16473481	0.633295	0.160478	outcome	TRUE	reported	380248	378749	1499	8	16330990	0.0440498	1.06267386540247e-47	24972	NA	NA	eqtl-a-ENSG00000038945	TRUE	reported	eqtl-a-ENSG00000038945	rs1554745	1.06267386540247e-47	2	1	TRUE	-0.0914341	210.514013653095	MSR1	ENSG00000038945
746	eqtl-a-ENSG00000038945	rs1654790	A	C	A	C	-0.3759	-0.0620538	0.441523	0.492091	FALSE	FALSE	FALSE	KIRC	16623514	0.0922869	0.0368609	outcome	TRUE	reported	380248	378749	1499	8	16481023	0.0115606	1e-200	31350	NA	NA	eqtl-a-ENSG00000038945	TRUE	reported	eqtl-a-ENSG00000038945	rs1654790	1e-200	2	1	TRUE	-0.180628	1057.26511324797	MSR1	ENSG00000038945
747	eqtl-a-ENSG00000038945	rs1654808	A	G	A	G	-0.244127	-0.0587858	0.389193	0.436982	FALSE	FALSE	FALSE	KIRC	16688695	0.116233	0.0374245	outcome	TRUE	reported	380248	378749	1499	8	16546204	0.0120328	1.62143670477362e-91	31141	NA	NA	eqtl-a-ENSG00000038945	TRUE	reported	eqtl-a-ENSG00000038945	rs1654808	1.62143670477362e-91	2	1	TRUE	-0.114221	411.621671597633	MSR1	ENSG00000038945
748	eqtl-a-ENSG00000038945	rs1697638	A	C	A	C	0.0746742	0.0132663	0.464649	0.495866	FALSE	FALSE	FALSE	KIRC	16823263	0.720542	0.0370841	outcome	TRUE	reported	380248	378749	1499	8	16680772	0.0119168	3.69972973462533e-10	30688	NA	NA	eqtl-a-ENSG00000038945	TRUE	reported	eqtl-a-ENSG00000038945	rs1697638	3.69972973462533e-10	2	1	TRUE	0.0357489342373783	39.2664695845839	MSR1	ENSG00000038945
749	eqtl-a-ENSG00000038945	rs17620811	G	A	G	A	-0.43263	0.193547	0.0747304	0.0471766	FALSE	FALSE	FALSE	KIRC	16151126	0.0241925	0.0858661	outcome	TRUE	reported	380248	378749	1499	8	16008635	0.0223392	1.4767262673986e-83	31470	NA	NA	eqtl-a-ENSG00000038945	TRUE	reported	eqtl-a-ENSG00000038945	rs17620811	1.4767262673986e-83	2	1	TRUE	-0.108528	375.057652028425	MSR1	ENSG00000038945
750	eqtl-a-ENSG00000038945	rs17677443	T	C	T	C	-0.461644	0.137954	0.0793716	0.0459385	FALSE	FALSE	FALSE	KIRC	16171561	0.114257	0.0873489	outcome	TRUE	reported	380248	378749	1499	8	16029070	0.021672	1.09698325929919e-100	31470	NA	NA	eqtl-a-ENSG00000038945	TRUE	reported	eqtl-a-ENSG00000038945	rs17677443	1.09698325929919e-100	2	1	TRUE	-0.119224	453.749758335319	MSR1	ENSG00000038945
751	eqtl-a-ENSG00000038945	rs185337520	A	G	A	G	0.37757	-0.0938377	0.0130741	0.00888865	FALSE	FALSE	FALSE	KIRC	16311514	0.628339	0.193853	outcome	TRUE	reported	380248	378749	1499	8	16169023	0.0522993	5.2215567204896e-13	2983	NA	NA	eqtl-a-ENSG00000038945	TRUE	reported	eqtl-a-ENSG00000038945	rs185337520	5.2215567204896e-13	2	1	TRUE	0.131086152821343	52.1198560629119	MSR1	ENSG00000038945
752	eqtl-a-ENSG00000038945	rs2043046	T	G	T	G	-0.150001	0.0453314	0.961273	0.968229	FALSE	FALSE	FALSE	KIRC	16382508	0.670212	0.106447	outcome	TRUE	reported	380248	378749	1499	8	16240017	0.0308213	1.13529833257085e-06	30967	NA	NA	eqtl-a-ENSG00000038945	TRUE	reported	eqtl-a-ENSG00000038945	rs2043046	1.13529833257085e-06	2	1	TRUE	-0.0276466	23.6857097623602	MSR1	ENSG00000038945
753	eqtl-a-ENSG00000038945	rs2056678	G	C	G	C	0.269643	-0.0822706	0.0482475	0.0240904	FALSE	TRUE	FALSE	KIRC	16529665	0.492555	0.119884	outcome	TRUE	reported	380248	378749	1499	8	16387174	0.0276816	2.0197610834356e-22	30966	NA	NA	eqtl-a-ENSG00000038945	TRUE	reported	eqtl-a-ENSG00000038945	rs2056678	2.0197610834356e-22	2	1	TRUE	0.0552719814276679	94.8846419652143	MSR1	ENSG00000038945
754	eqtl-a-ENSG00000038945	rs2170118	A	G	A	G	0.165567	-0.010251	0.0455167	0.018105	FALSE	FALSE	FALSE	KIRC	16182315	0.942466	0.142039	outcome	TRUE	reported	380248	378749	1499	8	16039824	0.0285205	6.43665156322789e-09	28259	NA	NA	eqtl-a-ENSG00000038945	TRUE	reported	eqtl-a-ENSG00000038945	rs2170118	6.43665156322789e-09	2	1	TRUE	0.034513960358408	33.7002629353334	MSR1	ENSG00000038945
755	eqtl-a-ENSG00000038945	rs2173905	T	C	T	C	0.0572026	0.0157381	0.461412	0.473351	FALSE	FALSE	FALSE	KIRC	16810023	0.670494	0.0369898	outcome	TRUE	reported	380248	378749	1499	8	16667532	0.0119294	1.62509966207798e-06	31346	NA	NA	eqtl-a-ENSG00000038945	TRUE	reported	eqtl-a-ENSG00000038945	rs2173905	1.62509966207798e-06	2	1	TRUE	0.0270745174543628	22.9929310000059	MSR1	ENSG00000038945
756	eqtl-a-ENSG00000038945	rs2569927	C	T	C	T	-0.428322	-0.0747094	0.408959	0.44924	FALSE	FALSE	FALSE	KIRC	16592255	0.0441489	0.0371195	outcome	TRUE	reported	380248	378749	1499	8	16449764	0.0115566	1e-200	31470	NA	NA	eqtl-a-ENSG00000038945	TRUE	reported	eqtl-a-ENSG00000038945	rs2569927	1e-200	2	1	TRUE	-0.204516	1373.66426411407	MSR1	ENSG00000038945
757	eqtl-a-ENSG00000038945	rs2604328	A	G	A	G	0.0654371	0.0116799	0.371749	0.408937	FALSE	FALSE	FALSE	KIRC	15867735	0.75537	0.0374876	outcome	TRUE	reported	380248	378749	1499	8	15725244	0.0123032	1.04570696337358e-07	31352	NA	NA	eqtl-a-ENSG00000038945	TRUE	reported	eqtl-a-ENSG00000038945	rs2604328	1.04570696337358e-07	2	1	TRUE	0.03002557504008	28.2886303506724	MSR1	ENSG00000038945
758	eqtl-a-ENSG00000038945	rs28463404	A	G	A	G	0.275563	-0.0913455	0.0475516	0.0240353	FALSE	FALSE	FALSE	KIRC	16504464	0.448446	0.120507	outcome	TRUE	reported	380248	378749	1499	8	16361973	0.0278704	4.73042324399956e-23	30633	NA	NA	eqtl-a-ENSG00000038945	TRUE	reported	eqtl-a-ENSG00000038945	rs28463404	4.73042324399956e-23	2	1	TRUE	0.0564033882806185	97.758697089643	MSR1	ENSG00000038945
759	eqtl-a-ENSG00000038945	rs2898436	T	A	T	A	0.102736	-0.0320069	0.906618	0.898551	FALSE	TRUE	FALSE	KIRC	16070177	0.602858	0.0615169	outcome	TRUE	reported	380248	378749	1499	8	15927686	0.0204368	4.97691243810348e-07	31349	NA	NA	eqtl-a-ENSG00000038945	TRUE	reported	eqtl-a-ENSG00000038945	rs2898436	4.97691243810348e-07	2	1	TRUE	0.0283815937920653	25.2708305397559	MSR1	ENSG00000038945
760	eqtl-a-ENSG00000038945	rs34679195	C	A	C	A	0.144935	0.0634865	0.0372726	0.0476192	FALSE	FALSE	FALSE	KIRC	15977304	0.467536	0.0873876	outcome	TRUE	reported	380248	378749	1499	8	15834813	0.0313957	3.90831896451807e-06	30255	NA	NA	eqtl-a-ENSG00000038945	TRUE	reported	eqtl-a-ENSG00000038945	rs34679195	3.90831896451807e-06	2	1	TRUE	0.0265317544614353	21.3111167642992	MSR1	ENSG00000038945
761	eqtl-a-ENSG00000038945	rs35238421	A	C	A	C	0.0743224	0.012688	0.309628	0.401617	FALSE	FALSE	FALSE	KIRC	15938451	0.736587	0.0377195	outcome	TRUE	reported	380248	378749	1499	8	15795960	0.0128579	7.46122265095322e-09	31023	NA	NA	eqtl-a-ENSG00000038945	TRUE	reported	eqtl-a-ENSG00000038945	rs35238421	7.46122265095322e-09	2	1	TRUE	0.032801071280371	33.4117607639426	MSR1	ENSG00000038945
762	eqtl-a-ENSG00000038945	rs35979828	T	C	T	C	-0.128979	0.0518194	0.0571059	0.0226487	FALSE	FALSE	FALSE	KIRC	54292096	0.68002	0.125643	outcome	TRUE	reported	380248	378749	1499	12	54685880	0.0256261	4.82358571132191e-07	29622	NA	NA	eqtl-a-ENSG00000038945	TRUE	reported	eqtl-a-ENSG00000038945	rs35979828	4.82358571132191e-07	2	1	TRUE	-0.029232	25.3322040611546	MSR1	ENSG00000038945
763	eqtl-a-ENSG00000038945	rs3908203	T	C	T	C	0.0788105	-0.00123476	0.166776	0.200072	FALSE	FALSE	FALSE	KIRC	16835639	0.978848	0.0465712	outcome	TRUE	reported	380248	378749	1499	8	16693148	0.0159522	7.80422892020055e-07	30803	NA	NA	eqtl-a-ENSG00000038945	TRUE	reported	eqtl-a-ENSG00000038945	rs3908203	7.80422892020055e-07	2	1	TRUE	0.0281390273865229	24.4077077040911	MSR1	ENSG00000038945
764	eqtl-a-ENSG00000038945	rs410717	A	G	A	G	-0.433082	0.145239	0.083592	0.0462857	FALSE	FALSE	FALSE	KIRC	16182727	0.0952972	0.0870685	outcome	TRUE	reported	380248	378749	1499	8	16040236	0.0211927	8.06863370363826e-93	28703	NA	NA	eqtl-a-ENSG00000038945	TRUE	reported	eqtl-a-ENSG00000038945	rs410717	8.06863370363826e-93	2	1	TRUE	-0.119756	417.606920086402	MSR1	ENSG00000038945
765	eqtl-a-ENSG00000038945	rs433235	C	T	C	T	-0.455097	0.14449	0.0854034	0.0464625	FALSE	FALSE	FALSE	KIRC	16192731	0.0963186	0.0868865	outcome	TRUE	reported	380248	378749	1499	8	16050240	0.0209484	1.19674053130725e-104	31470	NA	NA	eqtl-a-ENSG00000038945	TRUE	reported	eqtl-a-ENSG00000038945	rs433235	1.19674053130725e-104	2	1	TRUE	-0.121559	471.96112684417	MSR1	ENSG00000038945
766	eqtl-a-ENSG00000038945	rs4831809	C	A	C	A	0.216442	0.0117691	0.868582	0.903118	FALSE	FALSE	FALSE	KIRC	16221151	0.849678	0.0620965	outcome	TRUE	reported	380248	378749	1499	8	16078660	0.0175217	4.70435405725976e-35	31349	NA	NA	eqtl-a-ENSG00000038945	TRUE	reported	eqtl-a-ENSG00000038945	rs4831809	4.70435405725976e-35	2	1	TRUE	0.0696005764568229	152.591589218401	MSR1	ENSG00000038945
767	eqtl-a-ENSG00000038945	rs549926	A	G	A	G	-0.209931	-0.00723309	0.599796	0.606858	FALSE	FALSE	FALSE	KIRC	16745248	0.848077	0.0377564	outcome	TRUE	reported	380248	378749	1499	8	16602757	0.0120187	2.56448403651775e-68	31315	NA	NA	eqtl-a-ENSG00000038945	TRUE	reported	eqtl-a-ENSG00000038945	rs549926	2.56448403651775e-68	2	1	TRUE	-0.0982316	305.097156027433	MSR1	ENSG00000038945
768	eqtl-a-ENSG00000038945	rs56005237	G	C	G	C	-0.309296	-0.0546183	0.361527	0.412671	FALSE	TRUE	FALSE	KIRC	16658018	0.145216	0.037496	outcome	TRUE	reported	380248	378749	1499	8	16515527	0.0121114	7.49894209332456e-144	31350	NA	NA	eqtl-a-ENSG00000038945	TRUE	reported	eqtl-a-ENSG00000038945	rs56005237	7.49894209332456e-144	2	1	TRUE	-0.142759	652.168639954736	MSR1	ENSG00000038945
769	eqtl-a-ENSG00000038945	rs56388170	T	G	T	G	-0.0644736	0.0600694	0.289189	0.283094	FALSE	FALSE	FALSE	KIRC	28684757	0.142779	0.0409884	outcome	TRUE	reported	380248	378749	1499	7	28724374	0.0131161	8.85115609830836e-07	31141	NA	NA	eqtl-a-ENSG00000038945	TRUE	reported	eqtl-a-ENSG00000038945	rs56388170	8.85115609830836e-07	2	1	TRUE	-0.0278456	24.1631974457841	MSR1	ENSG00000038945
770	eqtl-a-ENSG00000038945	rs57020771	C	A	C	A	-0.105583	0.043606	0.0777556	0.0972473	FALSE	FALSE	FALSE	KIRC	16048538	0.487495	0.0628059	outcome	TRUE	reported	380248	378749	1499	8	15906047	0.0222079	1.99039833629881e-06	31470	NA	NA	eqtl-a-ENSG00000038945	TRUE	reported	eqtl-a-ENSG00000038945	rs57020771	1.99039833629881e-06	2	1	TRUE	-0.0267914	22.6033603677496	MSR1	ENSG00000038945
771	eqtl-a-ENSG00000038945	rs62489656	T	C	T	C	0.211938	0.0640105	0.0279133	0.0471298	FALSE	FALSE	FALSE	KIRC	16269415	0.469504	0.0884995	outcome	TRUE	reported	380248	378749	1499	8	16126924	0.0360875	4.28499184765746e-09	23311	NA	NA	eqtl-a-ENSG00000038945	TRUE	reported	eqtl-a-ENSG00000038945	rs62489656	4.28499184765746e-09	2	1	TRUE	0.0384387391416499	34.4908636821968	MSR1	ENSG00000038945
772	eqtl-a-ENSG00000038945	rs62490152	T	C	T	C	-0.501923	-0.068278	0.460435	0.449867	FALSE	FALSE	FALSE	KIRC	16550136	0.066243	0.0371728	outcome	TRUE	reported	380248	378749	1499	8	16407645	0.0111686	1e-200	31349	NA	NA	eqtl-a-ENSG00000038945	TRUE	reported	eqtl-a-ENSG00000038945	rs62490152	1e-200	2	1	TRUE	-0.246027	2019.65281918854	MSR1	ENSG00000038945
773	eqtl-a-ENSG00000038945	rs627377	C	T	C	T	-0.164063	-0.016989	0.492428	0.442775	FALSE	FALSE	FALSE	KIRC	16774040	0.652125	0.0376854	outcome	TRUE	reported	380248	378749	1499	8	16631549	0.0118245	8.97842170909732e-44	31141	NA	NA	eqtl-a-ENSG00000038945	TRUE	reported	eqtl-a-ENSG00000038945	rs627377	8.97842170909732e-44	2	1	TRUE	-0.0783858	192.511078058689	MSR1	ENSG00000038945
774	eqtl-a-ENSG00000038945	rs652078	G	A	G	A	-0.0645689	0.00971956	0.430888	0.416244	FALSE	FALSE	FALSE	KIRC	16799812	0.795481	0.0374984	outcome	TRUE	reported	380248	378749	1499	8	16657321	0.0120066	7.54015025010623e-08	31470	NA	NA	eqtl-a-ENSG00000038945	TRUE	reported	eqtl-a-ENSG00000038945	rs652078	7.54015025010623e-08	2	1	TRUE	-0.0303019	28.9205595194621	MSR1	ENSG00000038945
775	eqtl-a-ENSG00000038945	rs68025827	C	A	C	A	-0.0600987	0.00606207	0.41285	0.409309	FALSE	FALSE	FALSE	KIRC	16788891	0.871989	0.0376216	outcome	TRUE	reported	380248	378749	1499	8	16646400	0.012078	6.49127487721454e-07	31017	NA	NA	eqtl-a-ENSG00000038945	TRUE	reported	eqtl-a-ENSG00000038945	rs68025827	6.49127487721454e-07	2	1	TRUE	-0.028243	24.7593993741376	MSR1	ENSG00000038945
776	eqtl-a-ENSG00000038945	rs6995529	G	C	G	C	0.151416	-0.043164	0.0448135	0.0198949	FALSE	TRUE	FALSE	KIRC	16204168	0.755292	0.138493	outcome	TRUE	reported	380248	378749	1499	8	16061677	0.0287389	1.37470654387278e-07	31025	NA	NA	eqtl-a-ENSG00000038945	TRUE	reported	eqtl-a-ENSG00000038945	rs6995529	1.37470654387278e-07	2	1	TRUE	0.0298996096105036	27.7589641372293	MSR1	ENSG00000038945
777	eqtl-a-ENSG00000038945	rs7001318	C	T	C	T	-0.343019	-0.0681584	0.455306	0.503752	FALSE	FALSE	FALSE	KIRC	16646555	0.0646205	0.0368849	outcome	TRUE	reported	380248	378749	1499	8	16504064	0.0115974	2.90402265446441e-192	31464	NA	NA	eqtl-a-ENSG00000038945	TRUE	reported	eqtl-a-ENSG00000038945	rs7001318	2.90402265446441e-192	2	1	TRUE	-0.164478	874.81270176454	MSR1	ENSG00000038945
778	eqtl-a-ENSG00000038945	rs7002619	G	T	G	T	0.42596	-0.139468	0.91711	0.962124	FALSE	FALSE	FALSE	KIRC	16208048	0.144884	0.0956675	outcome	TRUE	reported	380248	378749	1499	8	16065557	0.0212867	4.43506511025307e-89	31348	NA	NA	eqtl-a-ENSG00000038945	TRUE	reported	eqtl-a-ENSG00000038945	rs7002619	4.43506511025307e-89	2	1	TRUE	0.11230861389254	400.424791040063	MSR1	ENSG00000038945
779	eqtl-a-ENSG00000038945	rs7015456	T	C	T	C	-0.144684	-0.050609	0.175045	0.140632	FALSE	FALSE	FALSE	KIRC	16359956	0.341218	0.053174	outcome	TRUE	reported	380248	378749	1499	8	16217465	0.0156149	1.9364219639466e-20	31020	NA	NA	eqtl-a-ENSG00000038945	TRUE	reported	eqtl-a-ENSG00000038945	rs7015456	1.9364219639466e-20	2	1	TRUE	-0.0525381	85.8544082763942	MSR1	ENSG00000038945
780	eqtl-a-ENSG00000038945	rs7016138	C	A	C	A	0.0950829	-0.0359047	0.901838	0.884991	FALSE	FALSE	FALSE	KIRC	16080855	0.533754	0.057698	outcome	TRUE	reported	380248	378749	1499	8	15938364	0.0199876	1.96299864581607e-06	31470	NA	NA	eqtl-a-ENSG00000038945	TRUE	reported	eqtl-a-ENSG00000038945	rs7016138	1.96299864581607e-06	2	1	TRUE	0.0268071778285955	22.6299471164978	MSR1	ENSG00000038945
781	eqtl-a-ENSG00000038945	rs71524160	A	G	A	G	0.229112	0.151218	0.0208783	0.0143312	FALSE	FALSE	FALSE	KIRC	15688923	0.320897	0.152343	outcome	TRUE	reported	380248	378749	1499	8	15546432	0.0415826	3.59649946472667e-08	28929	NA	NA	eqtl-a-ENSG00000038945	TRUE	reported	eqtl-a-ENSG00000038945	rs71524160	3.59649946472667e-08	2	1	TRUE	0.0323785002433842	30.3579465287877	MSR1	ENSG00000038945
782	eqtl-a-ENSG00000038945	rs71524170	T	C	T	C	0.293662	0.215176	0.0162616	0.012413	FALSE	FALSE	FALSE	KIRC	15883018	0.187906	0.163408	outcome	TRUE	reported	380248	378749	1499	8	15740527	0.0469919	4.1256273739926e-10	24816	NA	NA	eqtl-a-ENSG00000038945	TRUE	reported	eqtl-a-ENSG00000038945	rs71524170	4.1256273739926e-10	2	1	TRUE	0.0396401124791891	39.0525587596203	MSR1	ENSG00000038945
783	eqtl-a-ENSG00000038945	rs73191891	T	C	T	C	-0.395229	-0.0307008	0.287815	0.297528	FALSE	FALSE	FALSE	KIRC	16517811	0.445257	0.0402188	outcome	TRUE	reported	380248	378749	1499	8	16375320	0.0127181	1e-200	30532	NA	NA	eqtl-a-ENSG00000038945	TRUE	reported	eqtl-a-ENSG00000038945	rs73191891	1e-200	2	1	TRUE	-0.175106	965.724248212572	MSR1	ENSG00000038945
784	eqtl-a-ENSG00000038945	rs74402320	T	G	T	G	-0.114552	0.0442003	0.0762248	0.0965839	FALSE	FALSE	FALSE	KIRC	15991939	0.483945	0.0631459	outcome	TRUE	reported	380248	378749	1499	8	15849448	0.0224084	3.18427084142771e-07	31355	NA	NA	eqtl-a-ENSG00000038945	TRUE	reported	eqtl-a-ENSG00000038945	rs74402320	3.18427084142771e-07	2	1	TRUE	-0.0288583	26.1326622620713	MSR1	ENSG00000038945
785	eqtl-a-ENSG00000038945	rs75183217	C	T	C	T	0.594245	-0.0979645	0.0177582	0.0137506	FALSE	FALSE	FALSE	KIRC	16320545	0.539472	0.159653	outcome	TRUE	reported	380248	378749	1499	8	16178054	0.0447862	3.53020560376662e-40	24176	NA	NA	eqtl-a-ENSG00000038945	TRUE	reported	eqtl-a-ENSG00000038945	rs75183217	3.53020560376662e-40	2	1	TRUE	0.0850298412981517	176.052680622241	MSR1	ENSG00000038945
786	eqtl-a-ENSG00000038945	rs75523591	G	C	G	C	0.654377	-0.0666376	0.0174094	0.0137749	FALSE	TRUE	FALSE	KIRC	16421842	0.676865	0.1599	outcome	TRUE	reported	380248	378749	1499	8	16279351	0.0451712	1.47672626739858e-47	22409	NA	NA	eqtl-a-ENSG00000038945	TRUE	reported	eqtl-a-ENSG00000038945	rs75523591	1.47672626739858e-47	2	1	TRUE	0.0963274866611512	209.861511621998	MSR1	ENSG00000038945
787	eqtl-a-ENSG00000038945	rs75713061	C	T	C	T	0.608341	-0.0902857	0.017196	0.0136733	FALSE	FALSE	FALSE	KIRC	16389522	0.572445	0.159952	outcome	TRUE	reported	380248	378749	1499	8	16247031	0.045495	8.86135223659496e-41	24255	NA	NA	eqtl-a-ENSG00000038945	TRUE	reported	eqtl-a-ENSG00000038945	rs75713061	8.86135223659496e-41	2	1	TRUE	0.085547178080663	178.799720653981	MSR1	ENSG00000038945
788	eqtl-a-ENSG00000038945	rs75793350	C	T	C	T	-0.175254	-0.082631	0.0260818	0.00825529	FALSE	FALSE	FALSE	KIRC	16290858	0.677576	0.198741	outcome	TRUE	reported	380248	378749	1499	8	16148367	0.0373143	2.64271299338555e-06	26907	NA	NA	eqtl-a-ENSG00000038945	TRUE	reported	eqtl-a-ENSG00000038945	rs75793350	2.64271299338555e-06	2	1	TRUE	-0.0286219	22.0589725610132	MSR1	ENSG00000038945
789	eqtl-a-ENSG00000038945	rs75959292	C	T	C	T	0.429838	0.0702291	0.0175051	0.00790024	FALSE	FALSE	FALSE	KIRC	16308742	0.735223	0.207664	outcome	TRUE	reported	380248	378749	1499	8	16166251	0.0452389	2.07109490366033e-21	27283	NA	NA	eqtl-a-ENSG00000038945	TRUE	reported	eqtl-a-ENSG00000038945	rs75959292	2.07109490366033e-21	2	1	TRUE	0.0574308477028019	90.2787507779856	MSR1	ENSG00000038945
790	eqtl-a-ENSG00000038945	rs76379749	C	T	C	T	0.27192	-0.204732	0.0248475	0.0230809	FALSE	FALSE	FALSE	KIRC	16238488	0.0955719	0.122836	outcome	TRUE	reported	380248	378749	1499	8	16095997	0.0381669	1.04544213569415e-12	27157	NA	NA	eqtl-a-ENSG00000038945	TRUE	reported	eqtl-a-ENSG00000038945	rs76379749	1.04544213569415e-12	2	1	TRUE	0.0431940419254191	50.7584707379546	MSR1	ENSG00000038945
791	eqtl-a-ENSG00000038945	rs76762880	G	A	G	A	-0.155711	0.151618	0.0324358	0.0438796	FALSE	FALSE	FALSE	KIRC	16859817	0.0938642	0.0904989	outcome	TRUE	reported	380248	378749	1499	8	16717326	0.0335708	3.51123583349795e-06	27999	NA	NA	eqtl-a-ENSG00000038945	TRUE	reported	eqtl-a-ENSG00000038945	rs76762880	3.51123583349795e-06	2	1	TRUE	-0.0277099	21.513704852044	MSR1	ENSG00000038945
792	eqtl-a-ENSG00000038945	rs76798383	C	G	C	G	0.172911	-0.0427859	0.0445177	0.0318222	FALSE	TRUE	FALSE	KIRC	16370212	0.687808	0.106477	outcome	TRUE	reported	380248	378749	1499	8	16227721	0.0288213	1.98289628905472e-09	30963	NA	NA	eqtl-a-ENSG00000038945	TRUE	reported	eqtl-a-ENSG00000038945	rs76798383	1.98289628905472e-09	2	1	TRUE	0.0340760521182119	35.9930055130323	MSR1	ENSG00000038945
793	eqtl-a-ENSG00000038945	rs76843475	A	C	A	C	0.145712	-0.017694	0.0447944	0.0181759	FALSE	FALSE	FALSE	KIRC	16194039	0.900779	0.141918	outcome	TRUE	reported	380248	378749	1499	8	16051548	0.0287468	4.0074674172008e-07	31025	NA	NA	eqtl-a-ENSG00000038945	TRUE	reported	eqtl-a-ENSG00000038945	rs76843475	4.0074674172008e-07	2	1	TRUE	0.0287663096799836	25.6928110797965	MSR1	ENSG00000038945
794	eqtl-a-ENSG00000038945	rs7814815	C	T	C	T	-0.169385	0.0233979	0.108192	0.0959553	FALSE	FALSE	FALSE	KIRC	16448364	0.70929	0.0627611	outcome	TRUE	reported	380248	378749	1499	8	16305873	0.0191076	7.6647854016259e-19	31351	NA	NA	eqtl-a-ENSG00000038945	TRUE	reported	eqtl-a-ENSG00000038945	rs7814815	7.6647854016259e-19	2	1	TRUE	-0.050005	78.584630344755	MSR1	ENSG00000038945
795	eqtl-a-ENSG00000038945	rs7831854	C	T	C	T	0.211582	-0.0571959	0.0316574	0.029986	FALSE	FALSE	FALSE	KIRC	16397802	0.60295	0.109958	outcome	TRUE	reported	380248	378749	1499	8	16255311	0.0339465	4.58764706977764e-10	28868	NA	NA	eqtl-a-ENSG00000038945	TRUE	reported	eqtl-a-ENSG00000038945	rs7831854	4.58764706977764e-10	2	1	TRUE	0.0366604988481716	38.847889405958	MSR1	ENSG00000038945
796	eqtl-a-ENSG00000038945	rs79378275	C	G	C	G	0.598054	-0.0931017	0.0167439	0.0133805	FALSE	TRUE	FALSE	KIRC	16343319	0.566198	0.162294	outcome	TRUE	reported	380248	378749	1499	8	16200828	0.0461116	1.81970085860998e-38	24062	NA	NA	eqtl-a-ENSG00000038945	TRUE	reported	eqtl-a-ENSG00000038945	rs79378275	1.81970085860998e-38	2	1	TRUE	0.0833238854339455	168.213332686012	MSR1	ENSG00000038945
797	eqtl-a-ENSG00000038945	rs79474541	T	C	T	C	0.186491	-0.303365	0.0219824	0.0101946	FALSE	FALSE	FALSE	KIRC	16265278	0.0972277	0.182922	outcome	TRUE	reported	380248	378749	1499	8	16122787	0.040561	4.26982425568525e-06	24968	NA	NA	eqtl-a-ENSG00000038945	TRUE	reported	eqtl-a-ENSG00000038945	rs79474541	4.26982425568525e-06	2	1	TRUE	0.029086465600097	21.1396819094218	MSR1	ENSG00000038945
798	eqtl-a-ENSG00000038945	rs79661836	A	G	A	G	-0.102408	0.0325624	0.0770581	0.0968558	FALSE	FALSE	FALSE	KIRC	16003292	0.605327	0.0630132	outcome	TRUE	reported	380248	378749	1499	8	15860801	0.022301	4.38601386268979e-06	31354	NA	NA	eqtl-a-ENSG00000038945	TRUE	reported	eqtl-a-ENSG00000038945	rs79661836	4.38601386268979e-06	2	1	TRUE	-0.0259257	21.0872085773095	MSR1	ENSG00000038945
799	eqtl-a-ENSG00000038945	rs79704736	C	T	C	T	0.600868	-0.0706035	0.0187667	0.0138259	FALSE	FALSE	FALSE	KIRC	16402174	0.658337	0.15966	outcome	TRUE	reported	380248	378749	1499	8	16259683	0.043567	2.86351854447892e-43	23218	NA	NA	eqtl-a-ENSG00000038945	TRUE	reported	eqtl-a-ENSG00000038945	rs79704736	2.86351854447892e-43	2	1	TRUE	0.0901479453743629	190.214158395221	MSR1	ENSG00000038945
800	eqtl-a-ENSG00000038945	rs79772076	T	C	T	C	-0.437737	0.170324	0.0744026	0.0454695	FALSE	FALSE	FALSE	KIRC	16161392	0.0519792	0.0876467	outcome	TRUE	reported	380248	378749	1499	8	16018901	0.0223785	3.35119731967706e-85	31352	NA	NA	eqtl-a-ENSG00000038945	TRUE	reported	eqtl-a-ENSG00000038945	rs79772076	3.35119731967706e-85	2	1	TRUE	-0.109807	382.617269727297	MSR1	ENSG00000038945
801	eqtl-a-ENSG00000038945	rs80056116	A	G	A	G	0.6062	-0.0906233	0.0174708	0.0136695	FALSE	FALSE	FALSE	KIRC	16371452	0.571425	0.160125	outcome	TRUE	reported	380248	378749	1499	8	16228961	0.0451397	4.07755661750211e-41	24179	NA	NA	eqtl-a-ENSG00000038945	TRUE	reported	eqtl-a-ENSG00000038945	rs80056116	4.07755661750211e-41	2	1	TRUE	0.0860482913969367	180.34932750203	MSR1	ENSG00000038945
802	eqtl-a-ENSG00000038945	rs80226469	C	T	C	T	0.666335	-0.0955512	0.0179469	0.0137063	FALSE	FALSE	FALSE	KIRC	16459890	0.548929	0.159421	outcome	TRUE	reported	380248	378749	1499	8	16317399	0.0444792	9.80392544604418e-51	22775	NA	NA	eqtl-a-ENSG00000038945	TRUE	reported	eqtl-a-ENSG00000038945	rs80226469	9.80392544604418e-51	2	1	TRUE	0.09878614823793	224.425042680854	MSR1	ENSG00000038945
803	eqtl-a-ENSG00000038945	rs80332873	A	G	A	G	0.661816	-0.0857732	0.018225	0.0135724	FALSE	FALSE	FALSE	KIRC	16436064	0.593092	0.160515	outcome	TRUE	reported	380248	378749	1499	8	16293573	0.0441443	8.28132826390751e-51	22776	NA	NA	eqtl-a-ENSG00000038945	TRUE	reported	eqtl-a-ENSG00000038945	rs80332873	8.28132826390751e-51	2	1	TRUE	0.0988576737592395	224.763225405217	MSR1	ENSG00000038945
804	eqtl-a-ENSG00000038945	rs822279	A	C	A	C	-0.276176	-0.0287877	0.547917	0.560448	FALSE	FALSE	FALSE	KIRC	16634800	0.440045	0.0372841	outcome	TRUE	reported	380248	378749	1499	8	16492309	0.0117304	1.4655478409559e-122	31355	NA	NA	eqtl-a-ENSG00000038945	TRUE	reported	eqtl-a-ENSG00000038945	rs822279	1.4655478409559e-122	2	1	TRUE	-0.131804	554.301721382122	MSR1	ENSG00000038945
805	eqtl-a-ENSG00000038945	rs822314	T	G	T	G	-0.367572	-0.0627274	0.428822	0.490578	FALSE	FALSE	FALSE	KIRC	16613263	0.0891723	0.0369034	outcome	TRUE	reported	380248	378749	1499	8	16470772	0.0116212	1e-200	31351	NA	NA	eqtl-a-ENSG00000038945	TRUE	reported	eqtl-a-ENSG00000038945	rs822314	1e-200	2	1	TRUE	-0.175856	1000.4212127335	MSR1	ENSG00000038945
806	eqtl-a-ENSG00000049089	rs10889147	T	C	T	C	0.0969321	0.072124	0.882126	0.884237	FALSE	FALSE	FALSE	KIRC	40095799	0.212995	0.0579136	outcome	TRUE	reported	380248	378749	1499	1	40561471	0.0184394	1.46419864293528e-07	31684	NA	NA	eqtl-a-ENSG00000049089	TRUE	reported	eqtl-a-ENSG00000049089	rs10889147	1.46419864293528e-07	2	1	TRUE	0.0295206028755706	27.6338676021549	COL9A2	ENSG00000049089
807	eqtl-a-ENSG00000049089	rs76883196	G	T	G	T	-0.330151	-0.184649	0.0238938	0.0267618	FALSE	FALSE	FALSE	KIRC	40440862	0.106135	0.114277	outcome	TRUE	reported	380248	378749	1499	1	40906534	0.0388729	2.01001824711369e-17	31065	NA	NA	eqtl-a-ENSG00000049089	TRUE	reported	eqtl-a-ENSG00000049089	rs76883196	2.01001824711369e-17	2	1	TRUE	-0.0481327	72.1325610293011	COL9A2	ENSG00000049089
808	eqtl-a-ENSG00000049089	rs78601006	G	A	G	A	-0.329679	-0.167722	0.0246313	0.0269468	FALSE	FALSE	FALSE	KIRC	40453451	0.140214	0.11371	outcome	TRUE	reported	380248	378749	1499	1	40919123	0.0382983	7.42164197738885e-18	31180	NA	NA	eqtl-a-ENSG00000049089	TRUE	reported	eqtl-a-ENSG00000049089	rs78601006	7.42164197738885e-18	2	1	TRUE	-0.0486936	74.1009157115341	COL9A2	ENSG00000049089
809	eqtl-a-ENSG00000049089	rs79059810	A	G	A	G	-0.336579	-0.183829	0.0238746	0.0267471	FALSE	FALSE	FALSE	KIRC	40430562	0.108178	0.114433	outcome	TRUE	reported	380248	378749	1499	1	40896234	0.0388843	4.88652359342834e-18	31065	NA	NA	eqtl-a-ENSG00000049089	TRUE	reported	eqtl-a-ENSG00000049089	rs79059810	4.88652359342834e-18	2	1	TRUE	-0.0490533	74.9247773880559	COL9A2	ENSG00000049089
810	eqtl-a-ENSG00000049247	rs10864323	G	A	G	A	0.567024	0.187642	0.0511979	0.0113746	FALSE	FALSE	FALSE	KIRC	8054470	0.289395	0.177113	outcome	TRUE	reported	380248	378749	1499	1	8114530	0.0265791	5.55904257270409e-101	3007	NA	NA	eqtl-a-ENSG00000049247	TRUE	reported	eqtl-a-ENSG00000049247	rs10864323	5.55904257270409e-101	2	1	TRUE	0.362673501494564	455.116247993797	UTS2	ENSG00000049247
811	eqtl-a-ENSG00000049247	rs10864324	C	T	C	T	-0.375083	-0.0575836	0.912256	0.991563	FALSE	FALSE	FALSE	KIRC	8086629	0.783096	0.209177	outcome	TRUE	reported	380248	378749	1499	1	8146689	0.0207984	1.05002587211087e-72	2416	NA	NA	eqtl-a-ENSG00000049247	TRUE	reported	eqtl-a-ENSG00000049247	rs10864324	1.05002587211087e-72	2	1	TRUE	-0.344574	325.233227579583	UTS2	ENSG00000049247
812	eqtl-a-ENSG00000049247	rs11121044	T	C	T	C	1.3591	0.0562448	0.0299415	0.0357493	FALSE	FALSE	FALSE	KIRC	7872157	0.5706	0.099168	outcome	TRUE	reported	380248	378749	1499	1	7932217	0.032996	1e-200	25944	NA	NA	eqtl-a-ENSG00000049247	TRUE	reported	eqtl-a-ENSG00000049247	rs11121044	1e-200	2	1	TRUE	0.24776050270735	1696.6	UTS2	ENSG00000049247
813	eqtl-a-ENSG00000049247	rs115506976	C	T	C	T	0.249087	0.239291	0.0264858	0.0149097	FALSE	FALSE	FALSE	KIRC	7852430	0.124806	0.155899	outcome	TRUE	reported	380248	378749	1499	1	7912490	0.0370059	1.68500036778183e-11	26125	NA	NA	eqtl-a-ENSG00000049247	TRUE	reported	eqtl-a-ENSG00000049247	rs115506976	1.68500036778183e-11	2	1	TRUE	0.0416094794339396	45.3064654412493	UTS2	ENSG00000049247
814	eqtl-a-ENSG00000049247	rs11805216	G	A	G	A	-0.157864	0.00253255	0.207074	0.277814	FALSE	FALSE	FALSE	KIRC	8128737	0.951273	0.0414436	outcome	TRUE	reported	380248	378749	1499	1	8188797	0.0146279	3.75491404609843e-27	25702	NA	NA	eqtl-a-ENSG00000049247	TRUE	reported	eqtl-a-ENSG00000049247	rs11805216	3.75491404609843e-27	2	1	TRUE	-0.0671665	116.466826061186	UTS2	ENSG00000049247
815	eqtl-a-ENSG00000049247	rs12022570	C	G	C	G	1.13511	0.20545	0.0275587	0.0131034	FALSE	TRUE	FALSE	KIRC	7951740	0.211327	0.16437	outcome	TRUE	reported	380248	378749	1499	1	8011800	0.0350787	1e-200	11880	NA	NA	eqtl-a-ENSG00000049247	TRUE	reported	eqtl-a-ENSG00000049247	rs12022570	1e-200	2	1	TRUE	0.284627902758657	1047.10183076748	UTS2	ENSG00000049247
816	eqtl-a-ENSG00000049247	rs12082271	T	G	T	G	-0.0594789	-0.00298169	0.322469	0.302087	FALSE	FALSE	FALSE	KIRC	8189495	0.940912	0.0402256	outcome	TRUE	reported	380248	378749	1499	1	8249555	0.0127233	2.94238840172465e-06	25902	NA	NA	eqtl-a-ENSG00000049247	TRUE	reported	eqtl-a-ENSG00000049247	rs12082271	2.94238840172465e-06	2	1	TRUE	-0.0290356	21.8538	UTS2	ENSG00000049247
817	eqtl-a-ENSG00000049247	rs12140347	A	G	A	G	-0.0728261	0.0326793	0.246109	0.252359	FALSE	FALSE	FALSE	KIRC	8200139	0.439467	0.0422708	outcome	TRUE	reported	380248	378749	1499	1	8260199	0.0138038	1.32181294268467e-07	26176	NA	NA	eqtl-a-ENSG00000049247	TRUE	reported	eqtl-a-ENSG00000049247	rs12140347	1.32181294268467e-07	2	1	TRUE	-0.0325929	27.8340747822033	UTS2	ENSG00000049247
818	eqtl-a-ENSG00000049247	rs12408963	A	G	A	G	-0.123621	-0.0225518	0.0851891	0.056311	FALSE	FALSE	FALSE	KIRC	7755494	0.776882	0.0795802	outcome	TRUE	reported	380248	378749	1499	1	7815554	0.0212946	6.42125622864448e-09	26454	NA	NA	eqtl-a-ENSG00000049247	TRUE	reported	eqtl-a-ENSG00000049247	rs12408963	6.42125622864448e-09	2	1	TRUE	-0.0356711	33.7012129103364	UTS2	ENSG00000049247
819	eqtl-a-ENSG00000049247	rs12566535	A	G	A	G	-0.139087	0.014989	0.12562	0.11996	FALSE	FALSE	FALSE	KIRC	7864034	0.792343	0.0569338	outcome	TRUE	reported	380248	378749	1499	1	7924094	0.0179201	8.38687171248165e-15	26568	NA	NA	eqtl-a-ENSG00000049247	TRUE	reported	eqtl-a-ENSG00000049247	rs12566535	8.38687171248165e-15	2	1	TRUE	-0.0475654	60.2410068578261	UTS2	ENSG00000049247
820	eqtl-a-ENSG00000049247	rs12567416	A	G	A	G	1.20627	0.0526784	0.0331229	0.0358253	FALSE	FALSE	FALSE	KIRC	7861990	0.594795	0.0990378	outcome	TRUE	reported	380248	378749	1499	1	7922050	0.0316701	1e-200	25939	NA	NA	eqtl-a-ENSG00000049247	TRUE	reported	eqtl-a-ENSG00000049247	rs12567416	1e-200	2	1	TRUE	0.230153179178473	1450.74200111851	UTS2	ENSG00000049247
821	eqtl-a-ENSG00000049247	rs12567989	G	T	G	T	0.240671	-0.0252593	0.0160661	0.0259981	FALSE	FALSE	FALSE	KIRC	7759054	0.826414	0.11518	outcome	TRUE	reported	380248	378749	1499	1	7819114	0.0472943	3.60337947120492e-07	3330	NA	NA	eqtl-a-ENSG00000049247	TRUE	reported	eqtl-a-ENSG00000049247	rs12567989	3.60337947120492e-07	2	1	TRUE	0.087869908768655	25.8958351183158	UTS2	ENSG00000049247
822	eqtl-a-ENSG00000049247	rs12747548	C	T	C	T	-0.0888842	0.0833525	0.106705	0.0734885	FALSE	FALSE	FALSE	KIRC	7684796	0.234729	0.0701463	outcome	TRUE	reported	380248	378749	1499	1	7744856	0.0192632	3.94230299542232e-06	26449	NA	NA	eqtl-a-ENSG00000049247	TRUE	reported	eqtl-a-ENSG00000049247	rs12747548	3.94230299542232e-06	2	1	TRUE	-0.0283618	21.2908141222914	UTS2	ENSG00000049247
823	eqtl-a-ENSG00000049247	rs12750531	T	C	T	C	-0.187157	-0.0365448	0.179037	0.265901	FALSE	FALSE	FALSE	KIRC	7978117	0.382152	0.0418162	outcome	TRUE	reported	380248	378749	1499	1	8038177	0.0154442	8.43917514030471e-34	23687	NA	NA	eqtl-a-ENSG00000049247	TRUE	reported	eqtl-a-ENSG00000049247	rs12750531	8.43917514030471e-34	2	1	TRUE	-0.0784986	146.852490494354	UTS2	ENSG00000049247
824	eqtl-a-ENSG00000049247	rs13374834	G	A	G	A	0.241263	-0.00461885	0.0230965	0.00707929	FALSE	FALSE	FALSE	KIRC	8511650	0.983412	0.222147	outcome	TRUE	reported	380248	378749	1499	1	8571709	0.0395708	1.08081160701638e-09	20028	NA	NA	eqtl-a-ENSG00000049247	TRUE	reported	eqtl-a-ENSG00000049247	rs13374834	1.08081160701638e-09	2	1	TRUE	0.0430443427067626	37.1733573529853	UTS2	ENSG00000049247
825	eqtl-a-ENSG00000049247	rs141070156	C	T	C	T	1.14732	0.209358	0.0179062	0.0119808	FALSE	FALSE	FALSE	KIRC	7758671	0.225797	0.172844	outcome	TRUE	reported	380248	378749	1499	1	7818731	0.0438302	4.96592321450334e-151	22550	NA	NA	eqtl-a-ENSG00000049247	TRUE	reported	eqtl-a-ENSG00000049247	rs141070156	4.96592321450334e-151	2	1	TRUE	0.171734094510348	685.207682718458	UTS2	ENSG00000049247
826	eqtl-a-ENSG00000049247	rs145634325	T	C	T	C	0.987581	0.0731345	0.031147	0.0139205	FALSE	FALSE	FALSE	KIRC	7840887	0.644294	0.158401	outcome	TRUE	reported	380248	378749	1499	1	7900947	0.0332379	5.30884444230981e-194	25452	NA	NA	eqtl-a-ENSG00000049247	TRUE	reported	eqtl-a-ENSG00000049247	rs145634325	5.30884444230981e-194	2	1	TRUE	0.18310085026017	882.832470758636	UTS2	ENSG00000049247
827	eqtl-a-ENSG00000049247	rs150442886	C	T	C	T	-0.141147	0.0457256	0.040038	0.0207274	FALSE	FALSE	FALSE	KIRC	7875255	0.721496	0.128277	outcome	TRUE	reported	380248	378749	1499	1	7935315	0.0303353	3.27137251078514e-06	25723	NA	NA	eqtl-a-ENSG00000049247	TRUE	reported	eqtl-a-ENSG00000049247	rs150442886	3.27137251078514e-06	2	1	TRUE	-0.0289999	21.6494424050391	UTS2	ENSG00000049247
828	eqtl-a-ENSG00000049247	rs161826	G	A	G	A	1.52627	0.208288	0.0295568	0.0152658	FALSE	FALSE	FALSE	KIRC	7920278	0.172089	0.152534	outcome	TRUE	reported	380248	378749	1499	1	7980338	0.0327101	1e-200	21867	NA	NA	eqtl-a-ENSG00000049247	TRUE	reported	eqtl-a-ENSG00000049247	rs161826	1e-200	2	1	TRUE	0.300927836701332	2177.20334138388	UTS2	ENSG00000049247
829	eqtl-a-ENSG00000049247	rs17031614	A	G	A	G	0.960402	0.0742727	0.0323154	0.0139134	FALSE	FALSE	FALSE	KIRC	7827545	0.639059	0.158359	outcome	TRUE	reported	380248	378749	1499	1	7887605	0.0326716	6.28058358813321e-190	25567	NA	NA	eqtl-a-ENSG00000049247	TRUE	reported	eqtl-a-ENSG00000049247	rs17031614	6.28058358813321e-190	2	1	TRUE	0.180817909578918	864.10258604554	UTS2	ENSG00000049247
830	eqtl-a-ENSG00000049247	rs1883679	G	T	G	T	-0.184452	-0.0362871	0.181394	0.265943	FALSE	FALSE	FALSE	KIRC	8040391	0.386152	0.041872	outcome	TRUE	reported	380248	378749	1499	1	8100451	0.015367	3.41821991417657e-33	26452	NA	NA	eqtl-a-ENSG00000049247	TRUE	reported	eqtl-a-ENSG00000049247	rs1883679	3.41821991417657e-33	2	1	TRUE	-0.0736041	144.074975592612	UTS2	ENSG00000049247
831	eqtl-a-ENSG00000049247	rs2032562	G	T	G	T	-0.094692	0.0164446	0.707167	0.704905	FALSE	FALSE	FALSE	KIRC	7741107	0.683888	0.0403881	outcome	TRUE	reported	380248	378749	1499	1	7801167	0.0130547	4.06443329165213e-13	25939	NA	NA	eqtl-a-ENSG00000049247	TRUE	reported	eqtl-a-ENSG00000049247	rs2032562	4.06443329165213e-13	2	1	TRUE	-0.0449932	52.6129661585761	UTS2	ENSG00000049247
832	eqtl-a-ENSG00000049247	rs2050198	G	T	G	T	-0.183705	-0.0355126	0.182086	0.265932	FALSE	FALSE	FALSE	KIRC	8051779	0.396395	0.0418742	outcome	TRUE	reported	380248	378749	1499	1	8111839	0.0153447	4.98081028356723e-33	26453	NA	NA	eqtl-a-ENSG00000049247	TRUE	reported	eqtl-a-ENSG00000049247	rs2050198	4.98081028356723e-33	2	1	TRUE	-0.0734122	143.326055794797	UTS2	ENSG00000049247
833	eqtl-a-ENSG00000049247	rs2071983	A	G	A	G	0.968383	0.0743741	0.0311274	0.0139123	FALSE	FALSE	FALSE	KIRC	7797948	0.638631	0.158373	outcome	TRUE	reported	380248	378749	1499	1	7858008	0.0332886	4.75335225942797e-186	25452	NA	NA	eqtl-a-ENSG00000049247	TRUE	reported	eqtl-a-ENSG00000049247	rs2071983	4.75335225942797e-186	2	1	TRUE	0.179392648866346	846.258906042092	UTS2	ENSG00000049247
834	eqtl-a-ENSG00000049247	rs225097	A	G	A	G	0.617818	0.212584	0.0427768	0.0110407	FALSE	FALSE	FALSE	KIRC	8002079	0.233397	0.178394	outcome	TRUE	reported	380248	378749	1499	1	8062139	0.0289493	4.70977326396955e-101	4051	NA	NA	eqtl-a-ENSG00000049247	TRUE	reported	eqtl-a-ENSG00000049247	rs225097	4.70977326396955e-101	2	1	TRUE	0.317981159763602	455.454482561507	UTS2	ENSG00000049247
835	eqtl-a-ENSG00000049247	rs225128	T	C	T	C	0.454381	0.190639	0.0743207	0.011357	FALSE	FALSE	FALSE	KIRC	8033135	0.281673	0.17708	outcome	TRUE	reported	380248	378749	1499	1	8093195	0.0223667	9.47545339764671e-92	3640	NA	NA	eqtl-a-ENSG00000049247	TRUE	reported	eqtl-a-ENSG00000049247	rs225128	9.47545339764671e-92	2	1	TRUE	0.319192814978219	412.701930740417	UTS2	ENSG00000049247
836	eqtl-a-ENSG00000049247	rs2284662	T	G	T	G	0.445523	0.212584	0.0962604	0.0110407	FALSE	FALSE	FALSE	KIRC	7982910	0.233397	0.178394	outcome	TRUE	reported	380248	378749	1499	1	8042970	0.0198275	8.20351544329821e-112	1404	NA	NA	eqtl-a-ENSG00000049247	TRUE	reported	eqtl-a-ENSG00000049247	rs2284662	8.20351544329821e-112	2	1	TRUE	0.514562754572047	504.898803444365	UTS2	ENSG00000049247
837	eqtl-a-ENSG00000049247	rs2294889	G	A	G	A	-0.186759	-0.0361637	0.181111	0.265858	FALSE	FALSE	FALSE	KIRC	8015874	0.387147	0.0418173	outcome	TRUE	reported	380248	378749	1499	1	8075934	0.0153745	5.92243086876132e-34	26452	NA	NA	eqtl-a-ENSG00000049247	TRUE	reported	eqtl-a-ENSG00000049247	rs2294889	5.92243086876132e-34	2	1	TRUE	-0.0744834	147.557428470665	UTS2	ENSG00000049247
838	eqtl-a-ENSG00000049247	rs2605079	C	T	C	T	0.143804	0.0167693	0.0610951	0.0343766	FALSE	FALSE	FALSE	KIRC	8288582	0.867979	0.100883	outcome	TRUE	reported	380248	378749	1499	1	8348642	0.0248207	6.88921914797494e-09	24962	NA	NA	eqtl-a-ENSG00000049247	TRUE	reported	eqtl-a-ENSG00000049247	rs2605079	6.88921914797494e-09	2	1	TRUE	0.0366473705322889	33.5671046032666	UTS2	ENSG00000049247
839	eqtl-a-ENSG00000049247	rs2995036	T	C	T	C	0.070827	0.0192001	0.460493	0.453295	FALSE	FALSE	FALSE	KIRC	7716275	0.605832	0.0372071	outcome	TRUE	reported	380248	378749	1499	1	7776335	0.0119259	2.87117722241741e-09	26449	NA	NA	eqtl-a-ENSG00000049247	TRUE	reported	eqtl-a-ENSG00000049247	rs2995036	2.87117722241741e-09	2	1	TRUE	0.0364947230576698	35.2708046015049	UTS2	ENSG00000049247
840	eqtl-a-ENSG00000049247	rs34268176	T	C	T	C	-0.125468	-0.0249905	0.147206	0.178368	FALSE	FALSE	FALSE	KIRC	7695523	0.602439	0.047976	outcome	TRUE	reported	380248	378749	1499	1	7755583	0.0167649	7.20941457164424e-14	26569	NA	NA	eqtl-a-ENSG00000049247	TRUE	reported	eqtl-a-ENSG00000049247	rs34268176	7.20941457164424e-14	2	1	TRUE	-0.0458673	56.0097992353794	UTS2	ENSG00000049247
841	eqtl-a-ENSG00000049247	rs34466510	C	T	C	T	-0.180351	-0.0481965	0.179398	0.253993	FALSE	FALSE	FALSE	KIRC	8087352	0.255938	0.0424249	outcome	TRUE	reported	380248	378749	1499	1	8147412	0.0154376	1.56063017570255e-31	26443	NA	NA	eqtl-a-ENSG00000049247	TRUE	reported	eqtl-a-ENSG00000049247	rs34466510	1.56063017570255e-31	2	1	TRUE	-0.0716608	136.48267998486	UTS2	ENSG00000049247
842	eqtl-a-ENSG00000049247	rs34878017	C	T	C	T	-0.201387	-0.0400745	0.16621	0.263619	FALSE	FALSE	FALSE	KIRC	7944380	0.339299	0.0419386	outcome	TRUE	reported	380248	378749	1499	1	8004440	0.0158977	8.91866805159467e-37	23674	NA	NA	eqtl-a-ENSG00000049247	TRUE	reported	eqtl-a-ENSG00000049247	rs34878017	8.91866805159467e-37	2	1	TRUE	-0.0820564	160.470154294522	UTS2	ENSG00000049247
843	eqtl-a-ENSG00000049247	rs35731977	A	G	A	G	-0.204006	-0.0370086	0.17548	0.264686	FALSE	FALSE	FALSE	KIRC	7954508	0.376906	0.0418833	outcome	TRUE	reported	380248	378749	1499	1	8014568	0.0155525	2.61758021870383e-39	23675	NA	NA	eqtl-a-ENSG00000049247	TRUE	reported	eqtl-a-ENSG00000049247	rs35731977	2.61758021870383e-39	2	1	TRUE	-0.0849461	172.062195903185	UTS2	ENSG00000049247
844	eqtl-a-ENSG00000049247	rs36016881	G	A	G	A	-0.184244	-0.0346929	0.180324	0.266215	FALSE	FALSE	FALSE	KIRC	7991181	0.40663	0.0418067	outcome	TRUE	reported	380248	378749	1499	1	8051241	0.0154031	5.6467687161654e-33	26454	NA	NA	eqtl-a-ENSG00000049247	TRUE	reported	eqtl-a-ENSG00000049247	rs36016881	5.6467687161654e-33	2	1	TRUE	-0.0733474	143.077201677399	UTS2	ENSG00000049247
845	eqtl-a-ENSG00000049247	rs371782	G	A	G	A	-0.117497	0.00406517	0.900685	0.940064	FALSE	FALSE	FALSE	KIRC	8224802	0.958712	0.0785238	outcome	TRUE	reported	380248	378749	1499	1	8284862	0.0198753	3.38797346322618e-09	25787	NA	NA	eqtl-a-ENSG00000049247	TRUE	reported	eqtl-a-ENSG00000049247	rs371782	3.38797346322618e-09	2	1	TRUE	-0.0367905	34.9483093162861	UTS2	ENSG00000049247
846	eqtl-a-ENSG00000049247	rs3753500	T	C	T	C	0.935497	0.0324291	0.0414293	0.0353999	FALSE	FALSE	FALSE	KIRC	7851242	0.74412	0.0993536	outcome	TRUE	reported	380248	378749	1499	1	7911302	0.0288094	1e-200	26113	NA	NA	eqtl-a-ENSG00000049247	TRUE	reported	eqtl-a-ENSG00000049247	rs3753500	1e-200	2	1	TRUE	0.19701528465854	1054.42664337152	UTS2	ENSG00000049247
847	eqtl-a-ENSG00000049247	rs389298	A	G	A	G	0.406715	0.224772	0.0949145	0.0109508	FALSE	FALSE	FALSE	KIRC	7970994	0.210183	0.179378	outcome	TRUE	reported	380248	378749	1499	1	8031054	0.0200158	8.62779862488377e-92	2241	NA	NA	eqtl-a-ENSG00000049247	TRUE	reported	eqtl-a-ENSG00000049247	rs389298	8.62779862488377e-92	2	1	TRUE	0.394584004192035	412.890104013445	UTS2	ENSG00000049247
848	eqtl-a-ENSG00000049247	rs395847	C	T	C	T	-0.135117	-0.0372019	0.874422	0.906552	FALSE	FALSE	FALSE	KIRC	8213880	0.563797	0.0644511	outcome	TRUE	reported	380248	378749	1499	1	8273940	0.0179248	4.77199522026883e-14	26569	NA	NA	eqtl-a-ENSG00000049247	TRUE	reported	eqtl-a-ENSG00000049247	rs395847	4.77199522026883e-14	2	1	TRUE	-0.0461977	56.8213242317867	UTS2	ENSG00000049247
849	eqtl-a-ENSG00000049247	rs401691	T	C	T	C	-0.0711416	-0.0547669	0.801695	0.840861	FALSE	FALSE	FALSE	KIRC	8259575	0.278837	0.0505727	outcome	TRUE	reported	380248	378749	1499	1	8319635	0.014915	1.84590777895931e-06	26452	NA	NA	eqtl-a-ENSG00000049247	TRUE	reported	eqtl-a-ENSG00000049247	rs401691	1.84590777895931e-06	2	1	TRUE	-0.0293157	22.7510131467297	UTS2	ENSG00000049247
850	eqtl-a-ENSG00000049247	rs448472	A	C	A	C	0.410528	0.217402	0.0942569	0.0110063	FALSE	FALSE	FALSE	KIRC	8022810	0.224021	0.178799	outcome	TRUE	reported	380248	378749	1499	1	8082870	0.0200745	5.98273821560859e-93	2241	NA	NA	eqtl-a-ENSG00000049247	TRUE	reported	eqtl-a-ENSG00000049247	rs448472	5.98273821560859e-93	2	1	TRUE	0.396720803763632	418.211617462331	UTS2	ENSG00000049247
851	eqtl-a-ENSG00000049247	rs4908474	T	C	T	C	0.470911	0.0759703	0.0252604	0.0400076	FALSE	FALSE	FALSE	KIRC	7677342	0.418093	0.0938214	outcome	TRUE	reported	380248	378749	1499	1	7737402	0.0377221	9.17487170297667e-36	25494	NA	NA	eqtl-a-ENSG00000049247	TRUE	reported	eqtl-a-ENSG00000049247	rs4908474	9.17487170297667e-36	2	1	TRUE	0.077950257477167	155.842514328976	UTS2	ENSG00000049247
852	eqtl-a-ENSG00000049247	rs536218	A	T	A	T	-0.151002	-0.0144468	0.93632	0.965247	FALSE	TRUE	FALSE	KIRC	8278577	0.884381	0.0993467	outcome	TRUE	reported	380248	378749	1499	1	8338637	0.0243411	5.5256070868313e-10	26122	NA	NA	eqtl-a-ENSG00000049247	TRUE	reported	eqtl-a-ENSG00000049247	rs536218	5.5256070868313e-10	2	1	TRUE	-0.0383563	38.4844246251643	UTS2	ENSG00000049247
853	eqtl-a-ENSG00000049247	rs537801	C	T	C	T	1.55829	0.207446	0.0272299	0.0152657	FALSE	FALSE	FALSE	KIRC	7933971	0.173524	0.152425	outcome	TRUE	reported	380248	378749	1499	1	7994031	0.0341362	1e-200	21811	NA	NA	eqtl-a-ENSG00000049247	TRUE	reported	eqtl-a-ENSG00000049247	rs537801	1e-200	2	1	TRUE	0.295324271496421	2083.84886946122	UTS2	ENSG00000049247
854	eqtl-a-ENSG00000049247	rs57938292	A	G	A	G	0.462495	0.0791537	0.0280889	0.0411523	FALSE	FALSE	FALSE	KIRC	7667292	0.392463	0.0925602	outcome	TRUE	reported	380248	378749	1499	1	7727352	0.0358107	3.7144968979762e-38	22727	NA	NA	eqtl-a-ENSG00000049247	TRUE	reported	eqtl-a-ENSG00000049247	rs57938292	3.7144968979762e-38	2	1	TRUE	0.0853599766835343	166.79708759375	UTS2	ENSG00000049247
855	eqtl-a-ENSG00000049247	rs60102794	T	C	T	C	1.25051	0.115721	0.0236655	0.0128481	FALSE	FALSE	FALSE	KIRC	7786086	0.483599	0.165191	outcome	TRUE	reported	380248	378749	1499	1	7846146	0.0377138	1e-200	25081	NA	NA	eqtl-a-ENSG00000049247	TRUE	reported	eqtl-a-ENSG00000049247	rs60102794	1e-200	2	1	TRUE	0.204934439061053	1099.44561319093	UTS2	ENSG00000049247
856	eqtl-a-ENSG00000049247	rs664689	T	C	T	C	1.61996	0.06882	0.0264885	0.0141986	FALSE	FALSE	FALSE	KIRC	7910032	0.663381	0.158116	outcome	TRUE	reported	380248	378749	1499	1	7970092	0.0344641	1e-200	19006	NA	NA	eqtl-a-ENSG00000049247	TRUE	reported	eqtl-a-ENSG00000049247	rs664689	1e-200	2	1	TRUE	0.322724688741256	2209.4	UTS2	ENSG00000049247
857	eqtl-a-ENSG00000049247	rs697693	A	G	A	G	0.106875	0.0458629	0.187118	0.0986859	FALSE	FALSE	FALSE	KIRC	7826364	0.453748	0.0612174	outcome	TRUE	reported	380248	378749	1499	1	7886424	0.0152341	2.29297859182482e-12	26454	NA	NA	eqtl-a-ENSG00000049247	TRUE	reported	eqtl-a-ENSG00000049247	rs697693	2.29297859182482e-12	2	1	TRUE	0.0430949531863723	49.2173981600098	UTS2	ENSG00000049247
858	eqtl-a-ENSG00000049247	rs72636944	A	G	A	G	0.231156	-0.0144839	0.0227499	0.0071571	FALSE	FALSE	FALSE	KIRC	8460348	0.947702	0.220817	outcome	TRUE	reported	380248	378749	1499	1	8520408	0.039869	6.71908290858329e-09	20026	NA	NA	eqtl-a-ENSG00000049247	TRUE	reported	eqtl-a-ENSG00000049247	rs72636944	6.71908290858329e-09	2	1	TRUE	0.0409383351379306	33.6155062284826	UTS2	ENSG00000049247
859	eqtl-a-ENSG00000049247	rs7514076	T	C	T	C	-0.120046	-0.0296602	0.153425	0.22313	FALSE	FALSE	FALSE	KIRC	7705638	0.502749	0.0442577	outcome	TRUE	reported	380248	378749	1499	1	7765698	0.0164835	3.26964046834305e-13	26367	NA	NA	eqtl-a-ENSG00000049247	TRUE	reported	eqtl-a-ENSG00000049247	rs7514076	3.26964046834305e-13	2	1	TRUE	-0.0448072	53.039145972726	UTS2	ENSG00000049247
860	eqtl-a-ENSG00000049247	rs7514098	A	G	A	G	-0.0866493	-0.0421967	0.191987	0.266189	FALSE	FALSE	FALSE	KIRC	8117572	0.312094	0.0417443	outcome	TRUE	reported	380248	378749	1499	1	8177632	0.0150936	9.41195842240608e-09	26368	NA	NA	eqtl-a-ENSG00000049247	TRUE	reported	eqtl-a-ENSG00000049247	rs7514098	9.41195842240608e-09	2	1	TRUE	-0.0353329	32.9567550642521	UTS2	ENSG00000049247
861	eqtl-a-ENSG00000049247	rs7517357	T	C	T	C	-0.191966	-0.0447467	0.176159	0.265956	FALSE	FALSE	FALSE	KIRC	7965215	0.284749	0.0418306	outcome	TRUE	reported	380248	378749	1499	1	8025275	0.0155394	4.65800553220028e-35	23680	NA	NA	eqtl-a-ENSG00000049247	TRUE	reported	eqtl-a-ENSG00000049247	rs7517357	4.65800553220028e-35	2	1	TRUE	-0.0800244	152.608997388083	UTS2	ENSG00000049247
862	eqtl-a-ENSG00000049247	rs7545745	A	T	A	T	0.0810682	0.0377833	0.801555	0.733243	FALSE	TRUE	FALSE	KIRC	8105607	0.365235	0.0417294	outcome	TRUE	reported	380248	378749	1499	1	8165667	0.0149075	5.3822020832021e-08	26451	NA	NA	eqtl-a-ENSG00000049247	TRUE	reported	eqtl-a-ENSG00000049247	rs7545745	5.3822020832021e-08	2	1	TRUE	0.0334193829111945	29.5727304289133	UTS2	ENSG00000049247
863	eqtl-a-ENSG00000049247	rs76199632	T	C	T	C	1.40472	0.051049	0.0295748	0.0359405	FALSE	FALSE	FALSE	KIRC	7886817	0.605973	0.0989647	outcome	TRUE	reported	380248	378749	1499	1	7946877	0.0330826	1e-200	25945	NA	NA	eqtl-a-ENSG00000049247	TRUE	reported	eqtl-a-ENSG00000049247	rs76199632	1e-200	2	1	TRUE	0.254912095634488	1802.93580584258	UTS2	ENSG00000049247
864	eqtl-a-ENSG00000049247	rs78823403	C	G	C	G	0.284572	0.243963	0.0296198	0.00644831	FALSE	TRUE	FALSE	KIRC	7653455	0.306499	0.238572	outcome	TRUE	reported	380248	378749	1499	1	7713515	0.0350243	4.47404141575597e-16	2222	NA	NA	eqtl-a-ENSG00000049247	TRUE	reported	eqtl-a-ENSG00000049247	rs78823403	4.47404141575597e-16	2	1	TRUE	0.169935112751684	66.015422016085	UTS2	ENSG00000049247
865	eqtl-a-ENSG00000049247	rs79372391	C	A	C	A	0.968694	0.0742729	0.0312059	0.0139133	FALSE	FALSE	FALSE	KIRC	7810655	0.639058	0.158359	outcome	TRUE	reported	380248	378749	1499	1	7870715	0.033245	1.18576874816719e-186	25452	NA	NA	eqtl-a-ENSG00000049247	TRUE	reported	eqtl-a-ENSG00000049247	rs79372391	1.18576874816719e-186	2	1	TRUE	0.179676155894211	849.025129982331	UTS2	ENSG00000049247
866	eqtl-a-ENSG00000049247	rs79566595	C	T	C	T	1.22078	0.203792	0.0199711	0.0111473	FALSE	FALSE	FALSE	KIRC	7774920	0.251724	0.177803	outcome	TRUE	reported	380248	378749	1499	1	7834980	0.041283	3.54813389233585e-192	23519	NA	NA	eqtl-a-ENSG00000049247	TRUE	reported	eqtl-a-ENSG00000049247	rs79566595	3.54813389233585e-192	2	1	TRUE	0.189342189390604	874.444624068043	UTS2	ENSG00000049247
867	eqtl-a-ENSG00000049247	rs79902942	A	G	A	G	0.170104	0.0612729	0.0558653	0.0333923	FALSE	FALSE	FALSE	KIRC	8247840	0.549045	0.102259	outcome	TRUE	reported	380248	378749	1499	1	8307900	0.0258757	4.9045594144511e-11	25432	NA	NA	eqtl-a-ENSG00000049247	TRUE	reported	eqtl-a-ENSG00000049247	rs79902942	4.9045594144511e-11	2	1	TRUE	0.0411889318439096	43.2160269511975	UTS2	ENSG00000049247
868	eqtl-a-ENSG00000049247	rs9434596	A	C	A	C	0.586859	0.189465	0.0386374	0.0114378	FALSE	FALSE	FALSE	KIRC	8069139	0.284099	0.176879	outcome	TRUE	reported	380248	378749	1499	1	8129199	0.0304838	1.37404197501253e-82	4554	NA	NA	eqtl-a-ENSG00000049247	TRUE	reported	eqtl-a-ENSG00000049247	rs9434596	1.37404197501253e-82	2	1	TRUE	0.274388870316753	370.620409248911	UTS2	ENSG00000049247
869	eqtl-a-ENSG00000049247	rs9434618	G	A	G	A	-0.15796	-0.0754076	0.950112	0.94201	FALSE	FALSE	FALSE	KIRC	8140518	0.344162	0.0797143	outcome	TRUE	reported	380248	378749	1499	1	8200578	0.0273052	7.25120193934466e-09	22721	NA	NA	eqtl-a-ENSG00000049247	TRUE	reported	eqtl-a-ENSG00000049247	rs9434618	7.25120193934466e-09	2	1	TRUE	-0.038352	33.4659783902848	UTS2	ENSG00000049247
870	eqtl-a-ENSG00000049249	rs1040394	T	C	T	C	0.183721	0.260782	0.0300571	0.0286472	FALSE	FALSE	FALSE	KIRC	7892077	0.0196617	0.111792	outcome	TRUE	reported	380248	378749	1499	1	7952137	0.0348233	1.32321373432303e-07	29595	NA	NA	eqtl-a-ENSG00000049249	TRUE	reported	eqtl-a-ENSG00000049249	rs1040394	1.32321373432303e-07	2	1	TRUE	0.0306542174787379	27.834136500566	TNFRSF9	ENSG00000049249
871	eqtl-a-ENSG00000049249	rs10864326	A	G	A	G	-0.142839	0.0359208	0.43528	0.375756	FALSE	FALSE	FALSE	KIRC	8094229	0.345061	0.0380431	outcome	TRUE	reported	380248	378749	1499	1	8154289	0.0119441	5.82639601623575e-33	31566	NA	NA	eqtl-a-ENSG00000049249	TRUE	reported	eqtl-a-ENSG00000049249	rs10864326	5.82639601623575e-33	2	1	TRUE	-0.0671608	143.016695974427	TNFRSF9	ENSG00000049249
872	eqtl-a-ENSG00000049249	rs11121054	T	A	T	A	-0.56839	0.208101	0.0254501	0.0152625	FALSE	TRUE	FALSE	KIRC	7922459	0.172432	0.152518	outcome	TRUE	reported	380248	378749	1499	1	7982519	0.0374878	6.29216351287986e-52	28238	NA	NA	eqtl-a-ENSG00000049249	TRUE	reported	eqtl-a-ENSG00000049249	rs11121054	6.29216351287986e-52	2	1	TRUE	-0.0898657	229.886224909886	TNFRSF9	ENSG00000049249
873	eqtl-a-ENSG00000049249	rs111285185	T	G	T	G	-0.395619	0.0530134	0.0362798	0.0508491	FALSE	FALSE	FALSE	KIRC	7911207	0.530933	0.0846073	outcome	TRUE	reported	380248	378749	1499	1	7971267	0.0316554	7.67538201218379e-36	29138	NA	NA	eqtl-a-ENSG00000049249	TRUE	reported	eqtl-a-ENSG00000049249	rs111285185	7.67538201218379e-36	2	1	TRUE	-0.0730219	156.191958422831	TNFRSF9	ENSG00000049249
874	eqtl-a-ENSG00000049249	rs112163664	A	G	A	G	-0.275072	0.116312	0.0326513	0.0416605	FALSE	FALSE	FALSE	KIRC	8137348	0.215199	0.093846	outcome	TRUE	reported	380248	378749	1499	1	8197408	0.0334089	1.81677020981881e-16	25212	NA	NA	eqtl-a-ENSG00000049249	TRUE	reported	eqtl-a-ENSG00000049249	rs112163664	1.81677020981881e-16	2	1	TRUE	-0.0517863	67.7904344412095	TNFRSF9	ENSG00000049249
875	eqtl-a-ENSG00000049249	rs112723399	A	G	A	G	-0.24386	0.0182341	0.0205474	0.0233703	FALSE	FALSE	FALSE	KIRC	8185325	0.883485	0.12442	outcome	TRUE	reported	380248	378749	1499	1	8245385	0.0419039	5.89888595636119e-09	29044	NA	NA	eqtl-a-ENSG00000049249	TRUE	reported	eqtl-a-ENSG00000049249	rs112723399	5.89888595636119e-09	2	1	TRUE	-0.0341287	33.8666507858114	TNFRSF9	ENSG00000049249
876	eqtl-a-ENSG00000049249	rs1134924	T	C	T	C	0.0582004	0.00143388	0.525141	0.49944	FALSE	FALSE	FALSE	KIRC	179699089	0.968954	0.0368412	outcome	TRUE	reported	380248	378749	1499	5	179126090	0.0119085	1.02180965034043e-06	31155	NA	NA	eqtl-a-ENSG00000049249	TRUE	reported	eqtl-a-ENSG00000049249	rs1134924	1.02180965034043e-06	2	1	TRUE	0.0276791368663822	23.8856913992566	TNFRSF9	ENSG00000049249
877	eqtl-a-ENSG00000049249	rs116231375	T	C	T	C	-0.431596	0.11601	0.0241204	0.0128509	FALSE	FALSE	FALSE	KIRC	7791577	0.482337	0.165127	outcome	TRUE	reported	380248	378749	1499	1	7851637	0.0386226	5.41751347231345e-29	30199	NA	NA	eqtl-a-ENSG00000049249	TRUE	reported	eqtl-a-ENSG00000049249	rs116231375	5.41751347231345e-29	2	1	TRUE	-0.0641738	124.873938479854	TNFRSF9	ENSG00000049249
878	eqtl-a-ENSG00000049249	rs12022570	C	G	C	G	-0.389006	0.20545	0.0275587	0.0131034	FALSE	TRUE	FALSE	KIRC	7951740	0.211327	0.16437	outcome	TRUE	reported	380248	378749	1499	1	8011800	0.0362089	6.36502333247304e-27	16995	NA	NA	eqtl-a-ENSG00000049249	TRUE	reported	eqtl-a-ENSG00000049249	rs12022570	6.36502333247304e-27	2	1	TRUE	-0.0821365	115.420230391249	TNFRSF9	ENSG00000049249
879	eqtl-a-ENSG00000049249	rs12088110	A	G	A	G	-0.169827	0.0474418	0.393636	0.35643	FALSE	FALSE	FALSE	KIRC	8003468	0.216424	0.0383805	outcome	TRUE	reported	380248	378749	1499	1	8063528	0.0120982	9.20237654805676e-45	31569	NA	NA	eqtl-a-ENSG00000049249	TRUE	reported	eqtl-a-ENSG00000049249	rs12088110	9.20237654805676e-45	2	1	TRUE	-0.0787622	197.047965985677	TNFRSF9	ENSG00000049249
880	eqtl-a-ENSG00000049249	rs12094681	G	A	G	A	0.161516	-0.038383	0.550983	0.615747	FALSE	FALSE	FALSE	KIRC	8081760	0.311407	0.0379176	outcome	TRUE	reported	380248	378749	1499	1	8141820	0.0118884	4.83503920591617e-42	31231	NA	NA	eqtl-a-ENSG00000049249	TRUE	reported	eqtl-a-ENSG00000049249	rs12094681	4.83503920591617e-42	2	1	TRUE	0.0766537535679238	184.579847632725	TNFRSF9	ENSG00000049249
881	eqtl-a-ENSG00000049249	rs12753024	C	T	C	T	0.103775	-0.0569819	0.882929	0.933625	FALSE	FALSE	FALSE	KIRC	8275095	0.442452	0.0741894	outcome	TRUE	reported	380248	378749	1499	1	8335155	0.0184915	1.99769875981814e-08	30077	NA	NA	eqtl-a-ENSG00000049249	TRUE	reported	eqtl-a-ENSG00000049249	rs12753024	1.99769875981814e-08	2	1	TRUE	0.0323437596831306	31.4949701025147	TNFRSF9	ENSG00000049249
882	eqtl-a-ENSG00000049249	rs144975211	A	G	A	G	0.201292	-0.0260604	0.0239105	0.0235793	FALSE	FALSE	FALSE	KIRC	8227800	0.832135	0.122947	outcome	TRUE	reported	380248	378749	1499	1	8287860	0.0389219	2.32097252802402e-07	27471	NA	NA	eqtl-a-ENSG00000049249	TRUE	reported	eqtl-a-ENSG00000049249	rs144975211	2.32097252802402e-07	2	1	TRUE	0.0311888761533443	26.7463771874297	TNFRSF9	ENSG00000049249
883	eqtl-a-ENSG00000049249	rs146592847	A	G	A	G	-0.271338	0.645274	0.0130489	0.00420894	FALSE	FALSE	FALSE	KIRC	8218906	0.0202488	0.277931	outcome	TRUE	reported	380248	378749	1499	1	8278966	0.052396	2.23321224253499e-07	7489	NA	NA	eqtl-a-ENSG00000049249	TRUE	reported	eqtl-a-ENSG00000049249	rs146592847	2.23321224253499e-07	2	1	TRUE	-0.0597423	26.8179126667674	TNFRSF9	ENSG00000049249
884	eqtl-a-ENSG00000049249	rs149007767	T	C	T	C	-0.279113	-0.012157	0.149708	0.206172	FALSE	FALSE	FALSE	KIRC	50330658	0.791473	0.0459796	outcome	TRUE	reported	380248	378749	1499	7	50370254	0.0165154	4.48332270432735e-64	30077	NA	NA	eqtl-a-ENSG00000049249	TRUE	reported	eqtl-a-ENSG00000049249	rs149007767	4.48332270432735e-64	2	1	TRUE	-0.0969919	285.615607642236	TNFRSF9	ENSG00000049249
885	eqtl-a-ENSG00000049249	rs150442886	C	T	C	T	0.143143	0.0457256	0.040038	0.0207274	FALSE	FALSE	FALSE	KIRC	7875255	0.721496	0.128277	outcome	TRUE	reported	380248	378749	1499	1	7935315	0.0303346	2.37470682266746e-06	30838	NA	NA	eqtl-a-ENSG00000049249	TRUE	reported	eqtl-a-ENSG00000049249	rs150442886	2.37470682266746e-06	2	1	TRUE	0.0268624781606657	22.2671012911738	TNFRSF9	ENSG00000049249
886	eqtl-a-ENSG00000049249	rs161816	G	A	G	A	-0.171193	0.0510916	0.388056	0.357428	FALSE	FALSE	FALSE	KIRC	7963610	0.183672	0.0384282	outcome	TRUE	reported	380248	378749	1499	1	8023670	0.0121282	3.05281157716264e-45	31557	NA	NA	eqtl-a-ENSG00000049249	TRUE	reported	eqtl-a-ENSG00000049249	rs161816	3.05281157716264e-45	2	1	TRUE	-0.0792116	199.241271708941	TNFRSF9	ENSG00000049249
887	eqtl-a-ENSG00000049249	rs17031614	A	G	A	G	-0.294119	0.0742727	0.0323154	0.0139134	FALSE	FALSE	FALSE	KIRC	7827545	0.639059	0.158359	outcome	TRUE	reported	380248	378749	1499	1	7887605	0.0335656	1.90809502852819e-18	30682	NA	NA	eqtl-a-ENSG00000049249	TRUE	reported	eqtl-a-ENSG00000049249	rs17031614	1.90809502852819e-18	2	1	TRUE	-0.0499641	76.7816307582915	TNFRSF9	ENSG00000049249
888	eqtl-a-ENSG00000049249	rs17229038	T	C	T	C	-0.396594	0.0613886	0.0368204	0.051266	FALSE	FALSE	FALSE	KIRC	7942949	0.464937	0.0840086	outcome	TRUE	reported	380248	378749	1499	1	8003009	0.0314275	1.65082105748903e-36	29097	NA	NA	eqtl-a-ENSG00000049249	TRUE	reported	eqtl-a-ENSG00000049249	rs17229038	1.65082105748903e-36	2	1	TRUE	-0.0737805	159.247494808661	TNFRSF9	ENSG00000049249
889	eqtl-a-ENSG00000049249	rs17461217	G	A	G	A	-0.166496	0.0516061	0.0797467	0.104583	FALSE	FALSE	FALSE	KIRC	7698738	0.394465	0.0606026	outcome	TRUE	reported	380248	378749	1499	1	7758798	0.0219255	3.10670488278996e-14	30656	NA	NA	eqtl-a-ENSG00000049249	TRUE	reported	eqtl-a-ENSG00000049249	rs17461217	3.10670488278996e-14	2	1	TRUE	-0.0433314	57.6645087255429	TNFRSF9	ENSG00000049249
890	eqtl-a-ENSG00000049249	rs1890807	A	G	A	G	0.0759957	-0.0735891	0.80665	0.854156	FALSE	FALSE	FALSE	KIRC	8263660	0.160911	0.0524882	outcome	TRUE	reported	380248	378749	1499	1	8323720	0.015057	4.48332270432733e-07	31558	NA	NA	eqtl-a-ENSG00000049249	TRUE	reported	eqtl-a-ENSG00000049249	rs1890807	4.48332270432733e-07	2	1	TRUE	0.028401048251636	25.4742342759598	TNFRSF9	ENSG00000049249
891	eqtl-a-ENSG00000049249	rs2239847	C	T	C	T	0.0819897	-0.0207973	0.502322	0.522923	FALSE	FALSE	FALSE	KIRC	7738733	0.574074	0.0370019	outcome	TRUE	reported	380248	378749	1499	1	7798793	0.0118836	5.21434785414458e-12	31557	NA	NA	eqtl-a-ENSG00000049249	TRUE	reported	eqtl-a-ENSG00000049249	rs2239847	5.21434785414458e-12	2	1	TRUE	0.0388105550068879	47.601708934154	TNFRSF9	ENSG00000049249
892	eqtl-a-ENSG00000049249	rs225093	C	T	C	T	-0.178985	0.0351589	0.597623	0.68375	FALSE	FALSE	FALSE	KIRC	7980117	0.376372	0.0397454	outcome	TRUE	reported	380248	378749	1499	1	8040177	0.0120432	5.83310776539425e-50	30817	NA	NA	eqtl-a-ENSG00000049249	TRUE	reported	eqtl-a-ENSG00000049249	rs225093	5.83310776539425e-50	2	1	TRUE	-0.0843612	220.87648111704	TNFRSF9	ENSG00000049249
893	eqtl-a-ENSG00000049249	rs225118	A	G	A	G	-0.128934	0.0226743	0.605616	0.63651	FALSE	FALSE	FALSE	KIRC	8048694	0.555215	0.0384334	outcome	TRUE	reported	380248	378749	1499	1	8108754	0.0121298	2.17520403401952e-26	31231	NA	NA	eqtl-a-ENSG00000049249	TRUE	reported	eqtl-a-ENSG00000049249	rs225118	2.17520403401952e-26	2	1	TRUE	-0.0600414	112.98678008941	TNFRSF9	ENSG00000049249
894	eqtl-a-ENSG00000049249	rs225133	A	G	A	G	-0.178966	0.0512693	0.423783	0.371191	FALSE	FALSE	FALSE	KIRC	8038402	0.179089	0.0381592	outcome	TRUE	reported	380248	378749	1499	1	8098462	0.0119497	1.04111810762334e-50	31670	NA	NA	eqtl-a-ENSG00000049249	TRUE	reported	eqtl-a-ENSG00000049249	rs225133	1.04111810762334e-50	2	1	TRUE	-0.083863	224.298855822618	TNFRSF9	ENSG00000049249
895	eqtl-a-ENSG00000049249	rs228649	G	A	G	A	0.279695	-0.0465095	0.958763	0.966467	FALSE	FALSE	FALSE	KIRC	7851182	0.653759	0.10369	outcome	TRUE	reported	380248	378749	1499	1	7911242	0.0298398	7.03720171722058e-21	29143	NA	NA	eqtl-a-ENSG00000049249	TRUE	reported	eqtl-a-ENSG00000049249	rs228649	7.03720171722058e-21	2	1	TRUE	0.0548255347913358	87.8572467880342	TNFRSF9	ENSG00000049249
896	eqtl-a-ENSG00000049249	rs228669	C	T	C	T	0.287586	-0.0463966	0.926942	0.950135	FALSE	FALSE	FALSE	KIRC	7809988	0.587024	0.0854207	outcome	TRUE	reported	380248	378749	1499	1	7870048	0.0227425	1.18631494061161e-36	31684	NA	NA	eqtl-a-ENSG00000049249	TRUE	reported	eqtl-a-ENSG00000049249	rs228669	1.18631494061161e-36	2	1	TRUE	0.0708647114720553	159.903906503078	TNFRSF9	ENSG00000049249
897	eqtl-a-ENSG00000049249	rs228686	C	T	C	T	0.252645	-0.044153	0.958494	0.963915	FALSE	FALSE	FALSE	KIRC	7798865	0.657344	0.0995373	outcome	TRUE	reported	380248	378749	1499	1	7858925	0.0297639	2.09507705236519e-17	31240	NA	NA	eqtl-a-ENSG00000049249	TRUE	reported	eqtl-a-ENSG00000049249	rs228686	2.09507705236519e-17	2	1	TRUE	0.0479710231555451	72.0512868720157	TNFRSF9	ENSG00000049249
898	eqtl-a-ENSG00000049249	rs228696	C	T	C	T	0.261451	-0.0337895	0.958419	0.964041	FALSE	FALSE	FALSE	KIRC	7827433	0.734898	0.0997864	outcome	TRUE	reported	380248	378749	1499	1	7887493	0.0297326	1.44843829990071e-18	30856	NA	NA	eqtl-a-ENSG00000049249	TRUE	reported	eqtl-a-ENSG00000049249	rs228696	1.44843829990071e-18	2	1	TRUE	0.0499986367687744	77.3240936368897	TNFRSF9	ENSG00000049249
899	eqtl-a-ENSG00000049249	rs228713	C	T	C	T	0.343201	-0.112207	0.962342	0.976539	FALSE	FALSE	FALSE	KIRC	7879493	0.364175	0.123653	outcome	TRUE	reported	380248	378749	1499	1	7939553	0.0311307	2.90803748273531e-28	29439	NA	NA	eqtl-a-ENSG00000049249	TRUE	reported	eqtl-a-ENSG00000049249	rs228713	2.90803748273531e-28	2	1	TRUE	0.0641236402128834	121.540023690724	TNFRSF9	ENSG00000049249
900	eqtl-a-ENSG00000049249	rs36016881	G	A	G	A	0.084966	-0.0346929	0.180324	0.266215	FALSE	FALSE	FALSE	KIRC	7991181	0.40663	0.0418067	outcome	TRUE	reported	380248	378749	1499	1	8051241	0.0154644	3.92491268753391e-08	31569	NA	NA	eqtl-a-ENSG00000049249	TRUE	reported	eqtl-a-ENSG00000049249	rs36016881	3.92491268753391e-08	2	1	TRUE	0.030909208659355	30.1872948864376	TNFRSF9	ENSG00000049249
901	eqtl-a-ENSG00000049249	rs3813809	A	C	A	C	-0.412009	0.181362	0.0212681	0.0111521	FALSE	FALSE	FALSE	KIRC	7768357	0.307584	0.177752	outcome	TRUE	reported	380248	378749	1499	1	7828417	0.0411063	1.20781383510678e-23	28749	NA	NA	eqtl-a-ENSG00000049249	TRUE	reported	eqtl-a-ENSG00000049249	rs3813809	1.20781383510678e-23	2	1	TRUE	-0.0590126	100.460799701622	TNFRSF9	ENSG00000049249
902	eqtl-a-ENSG00000049249	rs4908474	T	C	T	C	-0.182599	0.0759703	0.0252604	0.0400076	FALSE	FALSE	FALSE	KIRC	7677342	0.418093	0.0938214	outcome	TRUE	reported	380248	378749	1499	1	7737402	0.0378986	1.44860506712229e-06	30609	NA	NA	eqtl-a-ENSG00000049249	TRUE	reported	eqtl-a-ENSG00000049249	rs4908474	1.44860506712229e-06	2	1	TRUE	-0.0275296	23.2140254021318	TNFRSF9	ENSG00000049249
903	eqtl-a-ENSG00000049249	rs4917017	A	G	A	G	0.0748907	-0.0723066	0.301139	0.270915	FALSE	FALSE	FALSE	KIRC	50295636	0.082264	0.0416106	outcome	TRUE	reported	380248	378749	1499	7	50335232	0.0129584	7.50567922926157e-09	31684	NA	NA	eqtl-a-ENSG00000049249	TRUE	reported	eqtl-a-ENSG00000049249	rs4917017	7.50567922926157e-09	2	1	TRUE	0.0324519955896694	33.4005037262996	TNFRSF9	ENSG00000049249
904	eqtl-a-ENSG00000049249	rs58911040	T	C	T	C	-0.50337	0.0758286	0.0274692	0.0178298	FALSE	FALSE	FALSE	KIRC	7899178	0.592026	0.141497	outcome	TRUE	reported	380248	378749	1499	1	7959238	0.0361668	4.92492929605026e-44	31177	NA	NA	eqtl-a-ENSG00000049249	TRUE	reported	eqtl-a-ENSG00000049249	rs58911040	4.92492929605026e-44	2	1	TRUE	-0.0785831	193.711091587951	TNFRSF9	ENSG00000049249
905	eqtl-a-ENSG00000049249	rs61595437	G	A	G	A	-0.3068	0.0731471	0.0308528	0.0139203	FALSE	FALSE	FALSE	KIRC	7841826	0.644239	0.158403	outcome	TRUE	reported	380248	378749	1499	1	7901886	0.0343223	3.92735355646726e-19	30567	NA	NA	eqtl-a-ENSG00000049249	TRUE	reported	eqtl-a-ENSG00000049249	rs61595437	3.92735355646726e-19	2	1	TRUE	-0.0510622	79.9020541620341	TNFRSF9	ENSG00000049249
906	eqtl-a-ENSG00000049249	rs6583437	A	G	A	G	0.0739624	-0.0408435	0.35565	0.297712	FALSE	FALSE	FALSE	KIRC	50310671	0.313246	0.0405019	outcome	TRUE	reported	380248	378749	1499	7	50350267	0.0124173	2.58172511743493e-09	31684	NA	NA	eqtl-a-ENSG00000049249	TRUE	reported	eqtl-a-ENSG00000049249	rs6583437	2.58172511743493e-09	2	1	TRUE	0.0334452535692448	35.478695472397	TNFRSF9	ENSG00000049249
907	eqtl-a-ENSG00000049249	rs664689	T	C	T	C	-0.532885	0.06882	0.0264885	0.0141986	FALSE	FALSE	FALSE	KIRC	7910032	0.663381	0.158116	outcome	TRUE	reported	380248	378749	1499	1	7970092	0.036791	1.52475476765991e-47	24121	NA	NA	eqtl-a-ENSG00000049249	TRUE	reported	eqtl-a-ENSG00000049249	rs664689	1.52475476765991e-47	2	1	TRUE	-0.0928606	209.789528307833	TNFRSF9	ENSG00000049249
908	eqtl-a-ENSG00000049249	rs6682378	T	C	T	C	-0.156732	0.0429105	0.409772	0.359105	FALSE	FALSE	FALSE	KIRC	8071697	0.264246	0.0384361	outcome	TRUE	reported	380248	378749	1499	1	8131757	0.0120301	8.43528965126526e-39	31231	NA	NA	eqtl-a-ENSG00000049249	TRUE	reported	eqtl-a-ENSG00000049249	rs6682378	8.43528965126526e-39	2	1	TRUE	-0.0735245	169.737138414338	TNFRSF9	ENSG00000049249
909	eqtl-a-ENSG00000049249	rs6700772	G	C	G	C	-0.166301	0.0572426	0.393526	0.338934	FALSE	TRUE	FALSE	KIRC	8027409	0.140928	0.0388786	outcome	TRUE	reported	380248	378749	1499	1	8087469	0.0121023	5.73587924842136e-43	31565	NA	NA	eqtl-a-ENSG00000049249	TRUE	reported	eqtl-a-ENSG00000049249	rs6700772	5.73587924842136e-43	2	1	TRUE	-0.0771157	188.822564976177	TNFRSF9	ENSG00000049249
910	eqtl-a-ENSG00000049249	rs6704330	T	G	T	G	-0.167205	0.0473321	0.389484	0.35631	FALSE	FALSE	FALSE	KIRC	8016025	0.217642	0.0383933	outcome	TRUE	reported	380248	378749	1499	1	8076085	0.012124	2.87144167979082e-43	31569	NA	NA	eqtl-a-ENSG00000049249	TRUE	reported	eqtl-a-ENSG00000049249	rs6704330	2.87144167979082e-43	2	1	TRUE	-0.0773895	190.198314933796	TNFRSF9	ENSG00000049249
911	eqtl-a-ENSG00000049249	rs697680	C	A	C	A	0.137678	-0.0194022	0.858696	0.886714	FALSE	FALSE	FALSE	KIRC	7781489	0.738113	0.0580291	outcome	TRUE	reported	380248	378749	1499	1	7841549	0.0170469	6.67113915796647e-16	31564	NA	NA	eqtl-a-ENSG00000049249	TRUE	reported	eqtl-a-ENSG00000049249	rs697680	6.67113915796647e-16	2	1	TRUE	0.045413875598006	65.2286319375821	TNFRSF9	ENSG00000049249
912	eqtl-a-ENSG00000049249	rs7210990	A	C	A	C	-0.0712673	0.0259802	0.481977	0.503579	FALSE	FALSE	FALSE	KIRC	16267450	0.480936	0.0368619	outcome	TRUE	reported	380248	378749	1499	17	16170764	0.0118961	2.08549906753096e-09	31569	NA	NA	eqtl-a-ENSG00000049249	TRUE	reported	eqtl-a-ENSG00000049249	rs7210990	2.08549906753096e-09	2	1	TRUE	-0.0336994	35.8898297959703	TNFRSF9	ENSG00000049249
913	eqtl-a-ENSG00000049249	rs75050832	G	A	G	A	-0.212615	0.0973964	0.0492828	0.0412593	FALSE	FALSE	FALSE	KIRC	7687512	0.296409	0.093277	outcome	TRUE	reported	380248	378749	1499	1	7747572	0.0274378	9.26189813096002e-15	30662	NA	NA	eqtl-a-ENSG00000049249	TRUE	reported	eqtl-a-ENSG00000049249	rs75050832	9.26189813096002e-15	2	1	TRUE	-0.0442113	60.0467116886836	TNFRSF9	ENSG00000049249
914	eqtl-a-ENSG00000049249	rs76025697	A	G	A	G	0.0599697	-0.00502155	0.441305	0.421194	FALSE	FALSE	FALSE	KIRC	179757487	0.892978	0.0373248	outcome	TRUE	reported	380248	378749	1499	5	179184488	0.0119757	5.51124858080826e-07	31240	NA	NA	eqtl-a-ENSG00000049249	TRUE	reported	eqtl-a-ENSG00000049249	rs76025697	5.51124858080826e-07	2	1	TRUE	0.0283214258035399	25.0762122069203	TNFRSF9	ENSG00000049249
915	eqtl-a-ENSG00000049249	rs76648881	C	T	C	T	0.247204	0.0468744	0.0309615	0.0177112	FALSE	FALSE	FALSE	KIRC	7947535	0.735431	0.138719	outcome	TRUE	reported	380248	378749	1499	1	8007595	0.0342977	5.6950822412793e-13	28475	NA	NA	eqtl-a-ENSG00000049249	TRUE	reported	eqtl-a-ENSG00000049249	rs76648881	5.6950822412793e-13	2	1	TRUE	0.0426754446362419	51.9494546712215	TNFRSF9	ENSG00000049249
916	eqtl-a-ENSG00000049249	rs76965901	A	C	A	C	-0.401282	0.0561145	0.0332912	0.0357491	FALSE	FALSE	FALSE	KIRC	7866223	0.571385	0.0991401	outcome	TRUE	reported	380248	378749	1499	1	7926283	0.0330042	5.16416369272072e-34	31178	NA	NA	eqtl-a-ENSG00000049249	TRUE	reported	eqtl-a-ENSG00000049249	rs76965901	5.16416369272072e-34	2	1	TRUE	-0.0686978	147.829442235905	TNFRSF9	ENSG00000049249
917	eqtl-a-ENSG00000049249	rs79522322	A	G	A	G	-0.407947	0.0524343	0.0312392	0.0359484	FALSE	FALSE	FALSE	KIRC	7887324	0.596336	0.098993	outcome	TRUE	reported	380248	378749	1499	1	7947384	0.0340399	4.27858338163742e-33	31180	NA	NA	eqtl-a-ENSG00000049249	TRUE	reported	eqtl-a-ENSG00000049249	rs79522322	4.27858338163742e-33	2	1	TRUE	-0.0677163	143.625295850684	TNFRSF9	ENSG00000049249
918	eqtl-a-ENSG00000049249	rs79828101	A	G	A	G	-0.384148	0.0955165	0.0332392	0.0289342	FALSE	FALSE	FALSE	KIRC	7899332	0.389986	0.111112	outcome	TRUE	reported	380248	378749	1499	1	7959392	0.0330439	3.06125847171977e-31	29143	NA	NA	eqtl-a-ENSG00000049249	TRUE	reported	eqtl-a-ENSG00000049249	rs79828101	3.06125847171977e-31	2	1	TRUE	-0.0679439	135.149534601388	TNFRSF9	ENSG00000049249
919	eqtl-a-ENSG00000049249	rs79902942	A	G	A	G	-0.133114	0.0612729	0.0558653	0.0333923	FALSE	FALSE	FALSE	KIRC	8247840	0.549045	0.102259	outcome	TRUE	reported	380248	378749	1499	1	8307900	0.0258911	2.72703052976252e-07	30547	NA	NA	eqtl-a-ENSG00000049249	TRUE	reported	eqtl-a-ENSG00000049249	rs79902942	2.72703052976252e-07	2	1	TRUE	-0.0294046	26.4330004682666	TNFRSF9	ENSG00000049249
920	eqtl-a-ENSG00000049249	rs9434576	C	T	C	T	-0.157905	0.212584	0.0710988	0.0110407	FALSE	FALSE	FALSE	KIRC	7992990	0.233397	0.178394	outcome	TRUE	reported	380248	378749	1499	1	8053050	0.0231213	8.51530092020943e-12	2166	NA	NA	eqtl-a-ENSG00000049249	TRUE	reported	eqtl-a-ENSG00000049249	rs9434576	8.51530092020943e-12	2	1	TRUE	-0.145253	46.6409369839861	TNFRSF9	ENSG00000049249
921	eqtl-a-ENSG00000049249	rs9434603	A	G	A	G	0.146829	-0.0253157	0.557053	0.6299	FALSE	FALSE	FALSE	KIRC	8123500	0.508181	0.0382601	outcome	TRUE	reported	380248	378749	1499	1	8183560	0.0119178	7.0518002186208e-35	31235	NA	NA	eqtl-a-ENSG00000049249	TRUE	reported	eqtl-a-ENSG00000049249	rs9434603	7.0518002186208e-35	2	1	TRUE	0.0695434389107595	151.78592303308	TNFRSF9	ENSG00000049249
922	eqtl-a-ENSG00000049249	rs9657975	T	C	T	C	-0.578394	0.207238	0.0248262	0.0152626	FALSE	FALSE	FALSE	KIRC	7936278	0.173917	0.152411	outcome	TRUE	reported	380248	378749	1499	1	7996338	0.0379404	1.77746067064296e-52	28236	NA	NA	eqtl-a-ENSG00000049249	TRUE	reported	eqtl-a-ENSG00000049249	rs9657975	1.77746067064296e-52	2	1	TRUE	-0.0903557	232.404079791793	TNFRSF9	ENSG00000049249
923	eqtl-a-ENSG00000049249	rs9657980	G	A	G	A	0.251809	0.0540924	0.0301509	0.0177325	FALSE	FALSE	FALSE	KIRC	7934973	0.696707	0.13878	outcome	TRUE	reported	380248	378749	1499	1	7995033	0.0347405	4.22376745949809e-13	28474	NA	NA	eqtl-a-ENSG00000049249	TRUE	reported	eqtl-a-ENSG00000049249	rs9657980	4.22376745949809e-13	2	1	TRUE	0.0429166561937186	52.537616645822	TNFRSF9	ENSG00000049249
924	eqtl-a-ENSG00000049249	rs9657998	G	A	G	A	0.233075	-0.152768	0.0278772	0.018888	FALSE	FALSE	FALSE	KIRC	7931076	0.253314	0.133733	outcome	TRUE	reported	380248	378749	1499	1	7991136	0.036101	1.0751028174813e-10	30508	NA	NA	eqtl-a-ENSG00000049249	TRUE	reported	eqtl-a-ENSG00000049249	rs9657998	1.0751028174813e-10	2	1	TRUE	0.0369391865415872	41.6824196504161	TNFRSF9	ENSG00000049249
925	eqtl-a-ENSG00000050438	rs10876200	C	A	C	A	0.0922635	0.0309201	0.261492	0.249807	FALSE	FALSE	FALSE	KIRC	51594734	0.468622	0.0426648	outcome	TRUE	reported	380248	378749	1499	12	51988518	0.0135214	8.89201117857948e-12	31355	NA	NA	eqtl-a-ENSG00000050438	TRUE	reported	eqtl-a-ENSG00000050438	rs10876200	8.89201117857948e-12	2	1	TRUE	0.0385076025837003	46.5603814598092	SLC4A8	ENSG00000050438
926	eqtl-a-ENSG00000050438	rs10876205	T	G	T	G	0.0683371	-0.0127964	0.22104	0.23583	FALSE	FALSE	FALSE	KIRC	51701746	0.769517	0.0436729	outcome	TRUE	reported	380248	378749	1499	12	52095530	0.0143318	1.86058707626802e-06	27071	NA	NA	eqtl-a-ENSG00000050438	TRUE	reported	eqtl-a-ENSG00000050438	rs10876205	1.86058707626802e-06	2	1	TRUE	0.0289692591901905	22.7358717996122	SLC4A8	ENSG00000050438
927	eqtl-a-ENSG00000050438	rs11169795	C	A	C	A	0.0855967	-0.00790039	0.272494	0.230215	FALSE	FALSE	FALSE	KIRC	51298641	0.857624	0.0440378	outcome	TRUE	reported	380248	378749	1499	12	51692425	0.013348	1.4306058611377e-10	31560	NA	NA	eqtl-a-ENSG00000050438	TRUE	reported	eqtl-a-ENSG00000050438	rs11169795	1.4306058611377e-10	2	1	TRUE	0.0360747484185603	41.1227	SLC4A8	ENSG00000050438
928	eqtl-a-ENSG00000050438	rs11169875	A	G	A	G	-0.178885	-0.0467467	0.063221	0.100765	FALSE	FALSE	FALSE	KIRC	51542442	0.455564	0.0626487	outcome	TRUE	reported	380248	378749	1499	12	51936226	0.0244102	2.32916363021397e-13	31166	NA	NA	eqtl-a-ENSG00000050438	TRUE	reported	eqtl-a-ENSG00000050438	rs11169875	2.32916363021397e-13	2	1	TRUE	-0.0414765	53.7038195787777	SLC4A8	ENSG00000050438
929	eqtl-a-ENSG00000050438	rs117281886	A	G	A	G	-0.38588	-0.153803	0.0360081	0.0348269	FALSE	FALSE	FALSE	KIRC	51434153	0.144606	0.105428	outcome	TRUE	reported	380248	378749	1499	12	51827937	0.0317798	6.29506182857197e-34	29264	NA	NA	eqtl-a-ENSG00000050438	TRUE	reported	eqtl-a-ENSG00000050438	rs117281886	6.29506182857197e-34	2	1	TRUE	-0.070804	147.435552037905	SLC4A8	ENSG00000050438
930	eqtl-a-ENSG00000050438	rs117723520	T	C	T	C	0.135006	-0.102568	0.0551693	0.0247334	FALSE	FALSE	FALSE	KIRC	51609393	0.378901	0.116565	outcome	TRUE	reported	380248	378749	1499	12	52003177	0.0260439	2.17640642839468e-07	25213	NA	NA	eqtl-a-ENSG00000050438	TRUE	reported	eqtl-a-ENSG00000050438	rs117723520	2.17640642839468e-07	2	1	TRUE	0.0326302715002984	26.8716356197078	SLC4A8	ENSG00000050438
931	eqtl-a-ENSG00000050438	rs117992501	T	C	T	C	-0.134839	0.130705	0.0611835	0.0458509	FALSE	FALSE	FALSE	KIRC	51212997	0.138895	0.0883193	outcome	TRUE	reported	380248	378749	1499	12	51606781	0.0248075	5.4612241242769e-08	31234	NA	NA	eqtl-a-ENSG00000050438	TRUE	reported	eqtl-a-ENSG00000050438	rs117992501	5.4612241242769e-08	2	1	TRUE	-0.0307417	29.5437109760067	SLC4A8	ENSG00000050438
932	eqtl-a-ENSG00000050438	rs11833891	C	T	C	T	0.0702013	0.0511404	0.2284	0.206119	FALSE	FALSE	FALSE	KIRC	51554317	0.262802	0.0456694	outcome	TRUE	reported	380248	378749	1499	12	51948101	0.0141652	7.20327507981242e-07	31233	NA	NA	eqtl-a-ENSG00000050438	TRUE	reported	eqtl-a-ENSG00000050438	rs11833891	7.20327507981242e-07	2	1	TRUE	0.0280323040506455	24.5609345379806	SLC4A8	ENSG00000050438
933	eqtl-a-ENSG00000050438	rs11836637	C	T	C	T	-0.349455	-0.12421	0.107971	0.0904276	FALSE	FALSE	FALSE	KIRC	51528696	0.060431	0.0661525	outcome	TRUE	reported	380248	378749	1499	12	51922480	0.018951	6.27480161997856e-76	31684	NA	NA	eqtl-a-ENSG00000050438	TRUE	reported	eqtl-a-ENSG00000050438	rs11836637	6.27480161997856e-76	2	1	TRUE	-0.103047	340.03079766289	SLC4A8	ENSG00000050438
934	eqtl-a-ENSG00000050438	rs12316391	C	G	C	G	-0.174563	0.00320278	0.100815	0.0803925	FALSE	TRUE	FALSE	KIRC	51388286	0.962701	0.0684882	outcome	TRUE	reported	380248	378749	1499	12	51782070	0.019713	8.35410635675616e-19	27765	NA	NA	eqtl-a-ENSG00000050438	TRUE	reported	eqtl-a-ENSG00000050438	rs12316391	8.35410635675616e-19	2	1	TRUE	-0.0530706	78.4149644980676	SLC4A8	ENSG00000050438
935	eqtl-a-ENSG00000050438	rs12427072	T	C	T	C	0.0865234	0.0329168	0.215111	0.19467	FALSE	FALSE	FALSE	KIRC	51579350	0.478857	0.0464833	outcome	TRUE	reported	380248	378749	1499	12	51973134	0.0144664	2.22039376941548e-09	31566	NA	NA	eqtl-a-ENSG00000050438	TRUE	reported	eqtl-a-ENSG00000050438	rs12427072	2.22039376941548e-09	2	1	TRUE	0.0336458211080832	35.7722465596779	SLC4A8	ENSG00000050438
936	eqtl-a-ENSG00000050438	rs12582273	C	T	C	T	0.0986984	0.00652543	0.297381	0.23833	FALSE	FALSE	FALSE	KIRC	51345687	0.880877	0.0435443	outcome	TRUE	reported	380248	378749	1499	12	51739471	0.012994	3.06337384469643e-14	31684	NA	NA	eqtl-a-ENSG00000050438	TRUE	reported	eqtl-a-ENSG00000050438	rs12582273	3.06337384469643e-14	2	1	TRUE	0.0426349618519548	57.6945114162042	SLC4A8	ENSG00000050438
937	eqtl-a-ENSG00000050438	rs12815890	A	G	A	G	0.16219	-0.000230909	0.545168	0.549081	FALSE	FALSE	FALSE	KIRC	51373403	0.995039	0.0371393	outcome	TRUE	reported	380248	378749	1499	12	51767187	0.0118741	1.77909852656514e-42	31233	NA	NA	eqtl-a-ENSG00000050438	TRUE	reported	eqtl-a-ENSG00000050438	rs12815890	1.77909852656514e-42	2	1	TRUE	0.0770614295701233	186.572118713186	SLC4A8	ENSG00000050438
938	eqtl-a-ENSG00000050438	rs17860343	C	T	C	T	0.0942207	0.00552275	0.276063	0.226553	FALSE	FALSE	FALSE	KIRC	51333594	0.900811	0.044311	outcome	TRUE	reported	380248	378749	1499	12	51727378	0.0132898	1.34493098768813e-12	31569	NA	NA	eqtl-a-ENSG00000050438	TRUE	reported	eqtl-a-ENSG00000050438	rs17860343	1.34493098768813e-12	2	1	TRUE	0.0398717905679593	50.2638513606766	SLC4A8	ENSG00000050438
939	eqtl-a-ENSG00000050438	rs1811724	A	G	A	G	0.113564	0.0528063	0.447405	0.516413	FALSE	FALSE	FALSE	KIRC	51514820	0.152203	0.0368812	outcome	TRUE	reported	380248	378749	1499	12	51908604	0.0119317	1.76888663259225e-21	31684	NA	NA	eqtl-a-ENSG00000050438	TRUE	reported	eqtl-a-ENSG00000050438	rs1811724	1.76888663259225e-21	2	1	TRUE	0.053396409064744	90.5892598739787	SLC4A8	ENSG00000050438
940	eqtl-a-ENSG00000050438	rs2884709	T	C	T	C	0.0888945	-0.0243799	0.820254	0.833157	FALSE	FALSE	FALSE	KIRC	51260462	0.624574	0.049818	outcome	TRUE	reported	380248	378749	1499	12	51654246	0.0154823	9.36742015522847e-09	30077	NA	NA	eqtl-a-ENSG00000050438	TRUE	reported	eqtl-a-ENSG00000050438	rs2884709	9.36742015522847e-09	2	1	TRUE	0.0330901470907041	32.9669542970059	SLC4A8	ENSG00000050438
941	eqtl-a-ENSG00000050438	rs4761967	T	C	T	C	0.110247	0.0464687	0.529138	0.585093	FALSE	FALSE	FALSE	KIRC	51472621	0.21502	0.0374784	outcome	TRUE	reported	380248	378749	1499	12	51866405	0.0118876	1.78978143940896e-20	27400	NA	NA	eqtl-a-ENSG00000050438	TRUE	reported	eqtl-a-ENSG00000050438	rs4761967	1.78978143940896e-20	2	1	TRUE	0.0559412999359851	86.0092566629692	SLC4A8	ENSG00000050438
942	eqtl-a-ENSG00000050438	rs4761976	T	C	T	C	0.110807	0.0360893	0.428896	0.502606	FALSE	FALSE	FALSE	KIRC	51487043	0.328041	0.0368986	outcome	TRUE	reported	380248	378749	1499	12	51880827	0.0119895	2.41935723660761e-20	31684	NA	NA	eqtl-a-ENSG00000050438	TRUE	reported	eqtl-a-ENSG00000050438	rs4761976	2.41935723660761e-20	2	1	TRUE	0.0518531553599733	85.4146272089862	SLC4A8	ENSG00000050438
943	eqtl-a-ENSG00000050438	rs4761998	A	G	A	G	0.0792897	0.00116919	0.277049	0.253824	FALSE	FALSE	FALSE	KIRC	51288375	0.978108	0.0426077	outcome	TRUE	reported	380248	378749	1499	12	51682159	0.013282	2.37837318628372e-09	31684	NA	NA	eqtl-a-ENSG00000050438	TRUE	reported	eqtl-a-ENSG00000050438	rs4761998	2.37837318628372e-09	2	1	TRUE	0.0335199130556153	35.637448073347	SLC4A8	ENSG00000050438
944	eqtl-a-ENSG00000050438	rs7131892	G	A	G	A	0.113281	0.0542956	0.568091	0.602173	FALSE	FALSE	FALSE	KIRC	51456943	0.151143	0.0378233	outcome	TRUE	reported	380248	378749	1499	12	51850727	0.0119775	3.13906276913766e-21	31231	NA	NA	eqtl-a-ENSG00000050438	TRUE	reported	eqtl-a-ENSG00000050438	rs7131892	3.13906276913766e-21	2	1	TRUE	0.0534429918126705	89.4502974821337	SLC4A8	ENSG00000050438
945	eqtl-a-ENSG00000050438	rs72644883	A	G	A	G	-0.362624	-0.134107	0.0930784	0.0819762	FALSE	FALSE	FALSE	KIRC	51418742	0.0526987	0.0692208	outcome	TRUE	reported	380248	378749	1499	12	51812526	0.0202563	1.13762728582342e-71	31225	NA	NA	eqtl-a-ENSG00000050438	TRUE	reported	eqtl-a-ENSG00000050438	rs72644883	1.13762728582342e-71	2	1	TRUE	-0.100796	320.474034339945	SLC4A8	ENSG00000050438
946	eqtl-a-ENSG00000050438	rs7306746	C	T	C	T	0.089785	0.00106831	0.264579	0.221627	FALSE	FALSE	FALSE	KIRC	51315498	0.980907	0.0446403	outcome	TRUE	reported	380248	378749	1499	12	51709282	0.0134715	2.65033028972711e-11	31568	NA	NA	eqtl-a-ENSG00000050438	TRUE	reported	eqtl-a-ENSG00000050438	rs7306746	2.65033028972711e-11	2	1	TRUE	0.0374863106999361	44.4197042938232	SLC4A8	ENSG00000050438
947	eqtl-a-ENSG00000050438	rs747301	G	A	G	A	0.100782	-0.00197151	0.340762	0.273409	FALSE	FALSE	FALSE	KIRC	51358836	0.962135	0.0415275	outcome	TRUE	reported	380248	378749	1499	12	51752620	0.0125287	8.69560893254594e-16	31683	NA	NA	eqtl-a-ENSG00000050438	TRUE	reported	eqtl-a-ENSG00000050438	rs747301	8.69560893254594e-16	2	1	TRUE	0.0451475780980739	64.7073962773489	SLC4A8	ENSG00000050438
948	eqtl-a-ENSG00000050438	rs76909895	A	G	A	G	-0.135098	0.132776	0.0611886	0.0454503	FALSE	FALSE	FALSE	KIRC	51242203	0.13322	0.0884276	outcome	TRUE	reported	380248	378749	1499	12	51635987	0.0248064	5.14564712360631e-08	31240	NA	NA	eqtl-a-ENSG00000050438	TRUE	reported	eqtl-a-ENSG00000050438	rs76909895	5.14564712360631e-08	2	1	TRUE	-0.0307991	29.6599459155456	SLC4A8	ENSG00000050438
949	eqtl-a-ENSG00000050438	rs7958092	A	C	A	C	-0.351521	-0.0916049	0.112129	0.0924767	FALSE	FALSE	FALSE	KIRC	51398561	0.160059	0.0652051	outcome	TRUE	reported	380248	378749	1499	12	51792345	0.0186295	2.05116217882555e-79	31228	NA	NA	eqtl-a-ENSG00000050438	TRUE	reported	eqtl-a-ENSG00000050438	rs7958092	2.05116217882555e-79	2	1	TRUE	-0.106177	356.041114801816	SLC4A8	ENSG00000050438
950	eqtl-a-ENSG00000050438	rs7979330	T	C	T	C	0.101737	0.0460653	0.53497	0.585191	FALSE	FALSE	FALSE	KIRC	51444359	0.219049	0.0374801	outcome	TRUE	reported	380248	378749	1499	12	51838143	0.011902	1.25227583459714e-17	31569	NA	NA	eqtl-a-ENSG00000050438	TRUE	reported	eqtl-a-ENSG00000050438	rs7979330	1.25227583459714e-17	2	1	TRUE	0.0480551887893198	73.0664424410284	SLC4A8	ENSG00000050438
951	eqtl-a-ENSG00000050438	rs9325148	A	G	A	G	0.0933701	-0.0216289	0.783708	0.779588	FALSE	FALSE	FALSE	KIRC	51277345	0.627552	0.0445796	outcome	TRUE	reported	380248	378749	1499	12	51671129	0.0144346	9.89236198851424e-11	31345	NA	NA	eqtl-a-ENSG00000050438	TRUE	reported	eqtl-a-ENSG00000050438	rs9325148	9.89236198851424e-11	2	1	TRUE	0.0365126287390712	41.8413935730114	SLC4A8	ENSG00000050438
952	eqtl-a-ENSG00000050767	rs10051137	A	C	A	C	0.143205	-0.0666105	0.103305	0.129533	FALSE	FALSE	FALSE	KIRC	178611290	0.229811	0.0554696	outcome	TRUE	reported	380248	378749	1499	5	178038291	0.019518	2.18423820913757e-13	11496	NA	NA	eqtl-a-ENSG00000050767	TRUE	reported	eqtl-a-ENSG00000050767	rs10051137	2.18423820913757e-13	2	1	TRUE	0.0682767164995039	53.8326471136057	COL23A1	ENSG00000050767
953	eqtl-a-ENSG00000050767	rs11249800	C	T	C	T	0.142946	-0.00274192	0.116796	0.103469	FALSE	FALSE	FALSE	KIRC	178365696	0.964194	0.06108	outcome	TRUE	reported	380248	378749	1499	5	177792697	0.0184919	1.07547420897279e-14	13925	NA	NA	eqtl-a-ENSG00000050767	TRUE	reported	eqtl-a-ENSG00000050767	rs11249800	1.07547420897279e-14	2	1	TRUE	0.0653723477944741	59.7559206569318	COL23A1	ENSG00000050767
954	eqtl-a-ENSG00000050767	rs11742670	C	G	C	G	-0.12471	0.0960161	0.206516	0.255973	FALSE	TRUE	FALSE	KIRC	178241309	0.0230797	0.0422585	outcome	TRUE	reported	380248	378749	1499	5	177668310	0.0146652	1.83484760775554e-17	14256	NA	NA	eqtl-a-ENSG00000050767	TRUE	reported	eqtl-a-ENSG00000050767	rs11742670	1.83484760775554e-17	2	1	TRUE	-0.071047	72.3146982185629	COL23A1	ENSG00000050767
955	eqtl-a-ENSG00000050767	rs11959914	A	G	A	G	0.132885	-0.0367392	0.341633	0.3674	FALSE	FALSE	FALSE	KIRC	178430478	0.34011	0.0385129	outcome	TRUE	reported	380248	378749	1499	5	177857479	0.0124997	2.13796208950222e-26	14255	NA	NA	eqtl-a-ENSG00000050767	TRUE	reported	eqtl-a-ENSG00000050767	rs11959914	2.13796208950222e-26	2	1	TRUE	0.0886968400274796	113.019333502909	COL23A1	ENSG00000050767
956	eqtl-a-ENSG00000050767	rs142704406	A	G	A	G	-0.159106	0.110983	0.0965818	0.114386	FALSE	FALSE	FALSE	KIRC	178253507	0.0552179	0.0578893	outcome	TRUE	reported	380248	378749	1499	5	177680508	0.0201044	2.49229817805262e-15	14252	NA	NA	eqtl-a-ENSG00000050767	TRUE	reported	eqtl-a-ENSG00000050767	rs142704406	2.49229817805262e-15	2	1	TRUE	-0.0661509	62.6312215365812	COL23A1	ENSG00000050767
957	eqtl-a-ENSG00000050767	rs17579398	A	G	A	G	-0.20008	0.0112354	0.0255	0.0218747	FALSE	FALSE	FALSE	KIRC	178305594	0.928898	0.125914	outcome	TRUE	reported	380248	378749	1499	5	177732595	0.0377182	1.12919773929881e-07	10333	NA	NA	eqtl-a-ENSG00000050767	TRUE	reported	eqtl-a-ENSG00000050767	rs17579398	1.12919773929881e-07	2	1	TRUE	-0.0521184	28.1387913646707	COL23A1	ENSG00000050767
958	eqtl-a-ENSG00000050767	rs185493	T	C	T	C	0.0687741	-0.0454779	0.408885	0.360205	FALSE	FALSE	FALSE	KIRC	178564257	0.236265	0.0383983	outcome	TRUE	reported	380248	378749	1499	5	177991258	0.0120924	1.28991175348364e-08	14263	NA	NA	eqtl-a-ENSG00000050767	TRUE	reported	eqtl-a-ENSG00000050767	rs185493	1.28991175348364e-08	2	1	TRUE	0.0475713474554074	32.3463158041767	COL23A1	ENSG00000050767
959	eqtl-a-ENSG00000050767	rs2546627	A	G	A	G	0.165898	-0.0270208	0.31245	0.311388	FALSE	FALSE	FALSE	KIRC	178454891	0.49894	0.0399622	outcome	TRUE	reported	380248	378749	1499	5	177881892	0.0127649	1.28233058265601e-38	9183	NA	NA	eqtl-a-ENSG00000050767	TRUE	reported	eqtl-a-ENSG00000050767	rs2546627	1.28233058265601e-38	2	1	TRUE	0.134406443524114	168.906929440257	COL23A1	ENSG00000050767
960	eqtl-a-ENSG00000050767	rs262041	G	A	G	A	0.0860654	-0.0709391	0.510115	0.436107	FALSE	FALSE	FALSE	KIRC	178585259	0.0561979	0.0371506	outcome	TRUE	reported	380248	378749	1499	5	178012260	0.0118839	4.41468783705263e-13	14263	NA	NA	eqtl-a-ENSG00000050767	TRUE	reported	eqtl-a-ENSG00000050767	rs262041	4.41468783705263e-13	2	1	TRUE	0.0605337322891813	52.4492407447276	COL23A1	ENSG00000050767
961	eqtl-a-ENSG00000050767	rs2672830	G	A	G	A	-0.227711	0.00587549	0.86352	0.86632	FALSE	FALSE	FALSE	KIRC	178519825	0.913789	0.0542718	outcome	TRUE	reported	380248	378749	1499	5	177946826	0.0172307	7.16968375580419e-40	14260	NA	NA	eqtl-a-ENSG00000050767	TRUE	reported	eqtl-a-ENSG00000050767	rs2672830	7.16968375580419e-40	2	1	TRUE	-0.110004	174.647421810188	COL23A1	ENSG00000050767
962	eqtl-a-ENSG00000050767	rs28645289	A	G	A	G	-0.0816925	0.196114	0.138021	0.12302	FALSE	FALSE	FALSE	KIRC	178414540	0.000233851	0.0533017	outcome	TRUE	reported	380248	378749	1499	5	177841541	0.0172416	2.15620475778626e-06	14257	NA	NA	eqtl-a-ENSG00000050767	TRUE	reported	eqtl-a-ENSG00000050767	rs28645289	2.15620475778626e-06	2	1	TRUE	-0.0396533	22.4496328529458	COL23A1	ENSG00000050767
963	eqtl-a-ENSG00000050767	rs2973685	C	T	C	T	-0.0606268	-0.00799749	0.467236	0.507973	FALSE	FALSE	FALSE	KIRC	178332836	0.828044	0.036819	outcome	TRUE	reported	380248	378749	1499	5	177759837	0.0119182	3.63772613296643e-07	14258	NA	NA	eqtl-a-ENSG00000050767	TRUE	reported	eqtl-a-ENSG00000050767	rs2973685	3.63772613296643e-07	2	1	TRUE	-0.0425659	25.8766441612563	COL23A1	ENSG00000050767
964	eqtl-a-ENSG00000050767	rs2973725	A	G	A	G	0.127331	-0.0687399	0.151415	0.135086	FALSE	FALSE	FALSE	KIRC	178377031	0.207733	0.0545631	outcome	TRUE	reported	380248	378749	1499	5	177804032	0.0165694	1.53497038210314e-14	14263	NA	NA	eqtl-a-ENSG00000050767	TRUE	reported	eqtl-a-ENSG00000050767	rs2973725	1.53497038210314e-14	2	1	TRUE	0.0642177416329325	59.0547363633084	COL23A1	ENSG00000050767
965	eqtl-a-ENSG00000050767	rs2973765	T	C	T	C	0.134413	0.0203839	0.943419	0.92513	FALSE	FALSE	FALSE	KIRC	178280426	0.773621	0.0708655	outcome	TRUE	reported	380248	378749	1499	5	177707427	0.0257359	1.76051609567385e-07	14262	NA	NA	eqtl-a-ENSG00000050767	TRUE	reported	eqtl-a-ENSG00000050767	rs2973765	1.76051609567385e-07	2	1	TRUE	0.0436945403020831	27.2774537377715	COL23A1	ENSG00000050767
966	eqtl-a-ENSG00000050767	rs34098943	C	G	C	G	-0.0679181	0.0657845	0.335491	0.324295	FALSE	TRUE	FALSE	KIRC	178322214	0.099195	0.0398993	outcome	TRUE	reported	380248	378749	1499	5	177749215	0.0125923	6.90605447906322e-08	14260	NA	NA	eqtl-a-ENSG00000050767	TRUE	reported	eqtl-a-ENSG00000050767	rs34098943	6.90605447906322e-08	2	1	TRUE	-0.0451241	29.0911528728836	COL23A1	ENSG00000050767
967	eqtl-a-ENSG00000050767	rs34724127	T	C	T	C	-0.0642499	0.0603258	0.392694	0.451777	FALSE	FALSE	FALSE	KIRC	178638442	0.102895	0.0369876	outcome	TRUE	reported	380248	378749	1499	5	178065443	0.0121755	1.3116863527094e-07	14263	NA	NA	eqtl-a-ENSG00000050767	TRUE	reported	eqtl-a-ENSG00000050767	rs34724127	1.3116863527094e-07	2	1	TRUE	-0.0441456	27.8465439336572	COL23A1	ENSG00000050767
968	eqtl-a-ENSG00000050767	rs3893464	A	G	A	G	-0.0595485	-0.0275711	0.485028	0.429526	FALSE	FALSE	FALSE	KIRC	29967473	0.458542	0.0371954	outcome	TRUE	reported	380248	378749	1499	6	29935250	0.0118983	5.58624527075083e-07	12790	NA	NA	eqtl-a-ENSG00000050767	TRUE	reported	eqtl-a-ENSG00000050767	rs3893464	5.58624527075083e-07	2	1	TRUE	-0.044214	25.0479289532302	COL23A1	ENSG00000050767
969	eqtl-a-ENSG00000050767	rs4419608	A	G	A	G	-0.0914183	0.0450266	0.250047	0.339139	FALSE	FALSE	FALSE	KIRC	178670048	0.249953	0.0391378	outcome	TRUE	reported	380248	378749	1499	5	178097049	0.0137226	2.70146907295724e-11	14263	NA	NA	eqtl-a-ENSG00000050767	TRUE	reported	eqtl-a-ENSG00000050767	rs4419608	2.70146907295724e-11	2	1	TRUE	-0.055699	44.3806310674871	COL23A1	ENSG00000050767
970	eqtl-a-ENSG00000050767	rs4976774	G	A	G	A	0.0836084	-0.0566298	0.320531	0.284228	FALSE	FALSE	FALSE	KIRC	178403604	0.168045	0.0410803	outcome	TRUE	reported	380248	378749	1499	5	177830605	0.0127339	5.18203092007226e-11	14263	NA	NA	eqtl-a-ENSG00000050767	TRUE	reported	eqtl-a-ENSG00000050767	rs4976774	5.18203092007226e-11	2	1	TRUE	0.0548981941129624	43.1098939978482	COL23A1	ENSG00000050767
971	eqtl-a-ENSG00000050767	rs55928357	G	A	G	A	-0.257842	-0.0280013	0.182513	0.196221	FALSE	FALSE	FALSE	KIRC	178501995	0.547389	0.0465387	outcome	TRUE	reported	380248	378749	1499	5	177928996	0.0152548	4.30526610491711e-64	14263	NA	NA	eqtl-a-ENSG00000050767	TRUE	reported	eqtl-a-ENSG00000050767	rs55928357	4.30526610491711e-64	2	1	TRUE	-0.140141	285.689504706154	COL23A1	ENSG00000050767
972	eqtl-a-ENSG00000050767	rs55986404	T	C	T	C	-0.142256	0.0884987	0.0479924	0.0454217	FALSE	FALSE	FALSE	KIRC	178197288	0.314995	0.0880764	outcome	TRUE	reported	380248	378749	1499	5	177624289	0.0278187	3.1574028744011e-07	13925	NA	NA	eqtl-a-ENSG00000050767	TRUE	reported	eqtl-a-ENSG00000050767	rs55986404	3.1574028744011e-07	2	1	TRUE	-0.0432972	26.1497489450871	COL23A1	ENSG00000050767
973	eqtl-a-ENSG00000050767	rs562759	G	C	G	C	0.0805329	-0.0628192	0.357653	0.324923	FALSE	TRUE	FALSE	KIRC	178574630	0.110442	0.0393553	outcome	TRUE	reported	380248	378749	1499	5	178001631	0.0123988	8.29277724857123e-11	14256	NA	NA	eqtl-a-ENSG00000050767	TRUE	reported	eqtl-a-ENSG00000050767	rs562759	8.29277724857123e-11	2	1	TRUE	0.0543229768323313	42.1878475026091	COL23A1	ENSG00000050767
974	eqtl-a-ENSG00000050767	rs56393344	A	G	A	G	0.155525	0.0218607	0.2918	0.294785	FALSE	FALSE	FALSE	KIRC	178420155	0.593589	0.0409652	outcome	TRUE	reported	380248	378749	1499	5	177847156	0.0130269	7.44731973905989e-33	14263	NA	NA	eqtl-a-ENSG00000050767	TRUE	reported	eqtl-a-ENSG00000050767	rs56393344	7.44731973905989e-33	2	1	TRUE	0.0994774400622208	142.533930503128	COL23A1	ENSG00000050767
975	eqtl-a-ENSG00000050767	rs57231103	T	C	T	C	0.151538	-0.101366	0.117275	0.107186	FALSE	FALSE	FALSE	KIRC	178387699	0.0925849	0.0602678	outcome	TRUE	reported	380248	378749	1499	5	177814700	0.0184541	2.182729911843e-16	14263	NA	NA	eqtl-a-ENSG00000050767	TRUE	reported	eqtl-a-ENSG00000050767	rs57231103	2.182729911843e-16	2	1	TRUE	0.0686008297088311	67.4306526158194	COL23A1	ENSG00000050767
976	eqtl-a-ENSG00000050767	rs59697910	A	C	A	C	-0.229732	0.105148	0.0574324	0.0493912	FALSE	FALSE	FALSE	KIRC	178444390	0.223769	0.0864301	outcome	TRUE	reported	380248	378749	1499	5	177871391	0.0255074	2.12520094327363e-19	14261	NA	NA	eqtl-a-ENSG00000050767	TRUE	reported	eqtl-a-ENSG00000050767	rs59697910	2.12520094327363e-19	2	1	TRUE	-0.0752106	81.1167611171097	COL23A1	ENSG00000050767
977	eqtl-a-ENSG00000050767	rs62389447	T	C	T	C	-0.237396	-0.0345836	0.155262	0.176455	FALSE	FALSE	FALSE	KIRC	178468550	0.475178	0.048431	outcome	TRUE	reported	380248	378749	1499	5	177895551	0.0163124	5.57314060463724e-48	14263	NA	NA	eqtl-a-ENSG00000050767	TRUE	reported	eqtl-a-ENSG00000050767	rs62389447	5.57314060463724e-48	2	1	TRUE	-0.12097	211.792740236498	COL23A1	ENSG00000050767
978	eqtl-a-ENSG00000050767	rs62389453	A	G	A	G	-0.261675	-0.0279725	0.183256	0.195816	FALSE	FALSE	FALSE	KIRC	178490684	0.547674	0.0465239	outcome	TRUE	reported	380248	378749	1499	5	177917685	0.0152256	3.34580017853303e-66	14262	NA	NA	eqtl-a-ENSG00000050767	TRUE	reported	eqtl-a-ENSG00000050767	rs62389453	3.34580017853303e-66	2	1	TRUE	-0.142454	295.376291560119	COL23A1	ENSG00000050767
979	eqtl-a-ENSG00000050767	rs62391088	A	G	A	G	-0.211414	-0.0235112	0.0269568	0.0219651	FALSE	FALSE	FALSE	KIRC	178530441	0.851048	0.125205	outcome	TRUE	reported	380248	378749	1499	5	177957442	0.0367058	8.42131669708707e-09	13423	NA	NA	eqtl-a-ENSG00000050767	TRUE	reported	eqtl-a-ENSG00000050767	rs62391088	8.42131669708707e-09	2	1	TRUE	-0.0496559	33.1740197316379	COL23A1	ENSG00000050767
980	eqtl-a-ENSG00000050767	rs62392840	T	A	T	A	-0.0761407	0.0653538	0.161456	0.242154	FALSE	TRUE	FALSE	KIRC	178721751	0.132289	0.0434205	outcome	TRUE	reported	380248	378749	1499	5	178148752	0.0161627	2.46501746124005e-06	11158	NA	NA	eqtl-a-ENSG00000050767	TRUE	reported	eqtl-a-ENSG00000050767	rs62392840	2.46501746124005e-06	2	1	TRUE	-0.0445571	22.1924835410708	COL23A1	ENSG00000050767
981	eqtl-a-ENSG00000050767	rs686282	G	A	G	A	-0.236724	-0.00524595	0.674987	0.65941	FALSE	FALSE	FALSE	KIRC	178480370	0.893028	0.039011	outcome	TRUE	reported	380248	378749	1499	5	177907371	0.0125499	2.31526123324374e-79	14256	NA	NA	eqtl-a-ENSG00000050767	TRUE	reported	eqtl-a-ENSG00000050767	rs686282	2.31526123324374e-79	2	1	TRUE	-0.156056	355.798449082073	COL23A1	ENSG00000050767
982	eqtl-a-ENSG00000050767	rs6866336	G	T	G	T	0.114089	-0.0690129	0.112806	0.132961	FALSE	FALSE	FALSE	KIRC	178599541	0.207724	0.0547787	outcome	TRUE	reported	380248	378749	1499	5	178026542	0.018789	1.26331019226463e-09	13437	NA	NA	eqtl-a-ENSG00000050767	TRUE	reported	eqtl-a-ENSG00000050767	rs6866336	1.26331019226463e-09	2	1	TRUE	0.0523149910961962	36.8706007812937	COL23A1	ENSG00000050767
983	eqtl-a-ENSG00000050767	rs6871004	A	G	A	G	0.16736	-0.0326391	0.10433	0.0806356	FALSE	FALSE	FALSE	KIRC	178551956	0.628986	0.0675541	outcome	TRUE	reported	380248	378749	1499	5	177978957	0.019419	6.78890919795587e-18	14257	NA	NA	eqtl-a-ENSG00000050767	TRUE	reported	eqtl-a-ENSG00000050767	rs6871004	6.78890919795587e-18	2	1	TRUE	0.0719967145668201	74.2761887022653	COL23A1	ENSG00000050767
984	eqtl-a-ENSG00000050767	rs6874126	T	A	T	A	0.114317	-0.0468288	0.0999922	0.115895	FALSE	TRUE	FALSE	KIRC	178648990	0.421667	0.0582786	outcome	TRUE	reported	380248	378749	1499	5	178075991	0.0198165	7.99337154209559e-09	13431	NA	NA	eqtl-a-ENSG00000050767	TRUE	reported	eqtl-a-ENSG00000050767	rs6874126	7.99337154209559e-09	2	1	TRUE	0.0497192509248757	33.2788058797145	COL23A1	ENSG00000050767
985	eqtl-a-ENSG00000050767	rs6880804	T	C	T	C	0.175215	-0.0175971	0.139157	0.141494	FALSE	FALSE	FALSE	KIRC	178541358	0.741047	0.0532493	outcome	TRUE	reported	380248	378749	1499	5	177968359	0.0171328	1.50418065848549e-24	13925	NA	NA	eqtl-a-ENSG00000050767	TRUE	reported	eqtl-a-ENSG00000050767	rs6880804	1.50418065848549e-24	2	1	TRUE	0.0863478288236929	104.588967490282	COL23A1	ENSG00000050767
986	eqtl-a-ENSG00000050767	rs6884657	C	T	C	T	0.0825333	-0.0432204	0.541346	0.487168	FALSE	FALSE	FALSE	KIRC	178627404	0.241583	0.0369077	outcome	TRUE	reported	380248	378749	1499	5	178054405	0.0119242	4.46580751293352e-12	14168	NA	NA	eqtl-a-ENSG00000050767	TRUE	reported	eqtl-a-ENSG00000050767	rs6884657	4.46580751293352e-12	2	1	TRUE	0.0580554802726873	47.9071038559201	COL23A1	ENSG00000050767
987	eqtl-a-ENSG00000050767	rs6899215	C	T	C	T	0.0760852	-0.000520189	0.335632	0.308585	FALSE	FALSE	FALSE	KIRC	178236551	0.989584	0.0398465	outcome	TRUE	reported	380248	378749	1499	5	177663552	0.0125877	1.49968483550237e-09	14263	NA	NA	eqtl-a-ENSG00000050767	TRUE	reported	eqtl-a-ENSG00000050767	rs6899215	1.49968483550237e-09	2	1	TRUE	0.0505502398287044	36.5348732741186	COL23A1	ENSG00000050767
988	eqtl-a-ENSG00000050767	rs72810690	A	C	A	C	-0.10327	0.040813	0.270255	0.371719	FALSE	FALSE	FALSE	KIRC	178688305	0.28694	0.0383271	outcome	TRUE	reported	380248	378749	1499	5	178115306	0.0133739	1.14524920770789e-14	14253	NA	NA	eqtl-a-ENSG00000050767	TRUE	reported	eqtl-a-ENSG00000050767	rs72810690	1.14524920770789e-14	2	1	TRUE	-0.0645486	59.6255243051769	COL23A1	ENSG00000050767
989	eqtl-a-ENSG00000050767	rs7702255	G	A	G	A	0.139419	-0.0470162	0.101721	0.115958	FALSE	FALSE	FALSE	KIRC	178659250	0.420038	0.0583072	outcome	TRUE	reported	380248	378749	1499	5	178086251	0.0196544	1.3085791612451e-12	14263	NA	NA	eqtl-a-ENSG00000050767	TRUE	reported	eqtl-a-ENSG00000050767	rs7702255	1.3085791612451e-12	2	1	TRUE	0.0592955846152705	50.3181129790287	COL23A1	ENSG00000050767
990	eqtl-a-ENSG00000050767	rs7710248	C	T	C	T	0.0672212	-0.0372795	0.570663	0.458554	FALSE	FALSE	FALSE	KIRC	178767668	0.316155	0.0371905	outcome	TRUE	reported	380248	378749	1499	5	178194669	0.0120109	2.18338337941774e-08	11484	NA	NA	eqtl-a-ENSG00000050767	TRUE	reported	eqtl-a-ENSG00000050767	rs7710248	2.18338337941774e-08	2	1	TRUE	0.0521591335138732	31.3228607472183	COL23A1	ENSG00000050767
991	eqtl-a-ENSG00000054356	rs10190834	G	T	G	T	-0.383078	-0.0866259	0.90478	0.949909	FALSE	FALSE	FALSE	KIRC	219205579	0.296444	0.0829679	outcome	TRUE	reported	380248	378749	1499	2	220070301	0.0200192	1.28085509453628e-81	28799	NA	NA	eqtl-a-ENSG00000054356	TRUE	reported	eqtl-a-ENSG00000054356	rs10190834	1.28085509453628e-81	2	1	TRUE	-0.112053	366.168504221002	PTPRN	ENSG00000054356
992	eqtl-a-ENSG00000054356	rs1024131	A	G	A	G	0.405669	0.0819574	0.091544	0.0500522	FALSE	FALSE	FALSE	KIRC	219252736	0.323789	0.083062	outcome	TRUE	reported	380248	378749	1499	2	220117458	0.0203541	2.20902179094387e-88	28916	NA	NA	eqtl-a-ENSG00000054356	TRUE	reported	eqtl-a-ENSG00000054356	rs1024131	2.20902179094387e-88	2	1	TRUE	0.116413383211169	397.227983145205	PTPRN	ENSG00000054356
993	eqtl-a-ENSG00000054356	rs10512472	C	T	C	T	0.111034	0.0898828	0.179037	0.179999	FALSE	FALSE	FALSE	KIRC	35557785	0.061007	0.0479773	outcome	TRUE	reported	380248	378749	1499	17	33884804	0.0154961	7.76783514384352e-13	31684	NA	NA	eqtl-a-ENSG00000054356	TRUE	reported	eqtl-a-ENSG00000054356	rs10512472	7.76783514384352e-13	2	1	TRUE	0.0402231124997648	51.3413342035526	PTPRN	ENSG00000054356
994	eqtl-a-ENSG00000054356	rs10876550	A	G	A	G	0.0662804	-0.0119252	0.590064	0.67762	FALSE	FALSE	FALSE	KIRC	54318524	0.762739	0.039502	outcome	TRUE	reported	380248	378749	1499	12	54712308	0.0120886	4.18167233860613e-08	31684	NA	NA	eqtl-a-ENSG00000054356	TRUE	reported	eqtl-a-ENSG00000054356	rs10876550	4.18167233860613e-08	2	1	TRUE	0.0307890913496179	30.062024647627	PTPRN	ENSG00000054356
995	eqtl-a-ENSG00000054356	rs1109866	T	C	T	C	-0.387463	-0.0869619	0.904028	0.949899	FALSE	FALSE	FALSE	KIRC	219218557	0.294581	0.0829689	outcome	TRUE	reported	380248	378749	1499	2	220083279	0.0199411	4.28647208702378e-84	28832	NA	NA	eqtl-a-ENSG00000054356	TRUE	reported	eqtl-a-ENSG00000054356	rs1109866	4.28647208702378e-84	2	1	TRUE	-0.113693	377.53937342354	PTPRN	ENSG00000054356
996	eqtl-a-ENSG00000054356	rs112253950	A	G	A	G	-0.158799	-0.0664711	0.0319079	0.0311073	FALSE	FALSE	FALSE	KIRC	218944519	0.53866	0.108111	outcome	TRUE	reported	380248	378749	1499	2	219809241	0.0338375	2.69227860523214e-06	24929	NA	NA	eqtl-a-ENSG00000054356	TRUE	reported	eqtl-a-ENSG00000054356	rs112253950	2.69227860523214e-06	2	1	TRUE	-0.0297114	22.0241415136147	PTPRN	ENSG00000054356
997	eqtl-a-ENSG00000054356	rs113740748	C	T	C	T	-0.195139	0.298443	0.0311818	0.010685	FALSE	FALSE	FALSE	KIRC	219184461	0.0973756	0.180034	outcome	TRUE	reported	380248	378749	1499	2	220049183	0.0342036	1.16209063144351e-08	29833	NA	NA	eqtl-a-ENSG00000054356	TRUE	reported	eqtl-a-ENSG00000054356	rs113740748	1.16209063144351e-08	2	1	TRUE	-0.0330143	32.5495143007736	PTPRN	ENSG00000054356
998	eqtl-a-ENSG00000054356	rs11653357	A	G	A	G	0.112703	0.0787962	0.17703	0.172278	FALSE	FALSE	FALSE	KIRC	35596588	0.105577	0.0486877	outcome	TRUE	reported	380248	378749	1499	17	33923607	0.0155641	4.44733659389797e-13	31484	NA	NA	eqtl-a-ENSG00000054356	TRUE	reported	eqtl-a-ENSG00000054356	rs11653357	4.44733659389797e-13	2	1	TRUE	0.0407773440584847	52.435199904252	PTPRN	ENSG00000054356
999	eqtl-a-ENSG00000054356	rs11903211	G	A	G	A	0.453468	0.0896232	0.147926	0.0694882	FALSE	FALSE	FALSE	KIRC	219328712	0.203842	0.0705316	outcome	TRUE	reported	380248	378749	1499	2	220193434	0.0163239	7.74461797802537e-170	31568	NA	NA	eqtl-a-ENSG00000054356	TRUE	reported	eqtl-a-ENSG00000054356	rs11903211	7.74461797802537e-170	2	1	TRUE	0.154478552918606	771.694561795596	PTPRN	ENSG00000054356
1000	eqtl-a-ENSG00000054356	rs1354034	C	T	C	T	0.0727593	-0.00401403	0.618137	0.705252	FALSE	FALSE	FALSE	KIRC	56815721	0.921055	0.0405029	outcome	TRUE	reported	380248	378749	1499	3	56849749	0.012235	2.73438712195294e-09	31684	NA	NA	eqtl-a-ENSG00000054356	TRUE	reported	eqtl-a-ENSG00000054356	rs1354034	2.73438712195294e-09	2	1	TRUE	0.0333915047913545	35.3646266037544	PTPRN	ENSG00000054356
1001	eqtl-a-ENSG00000054356	rs140657989	C	T	C	T	0.464617	0.218284	0.0213193	0.0123994	FALSE	FALSE	FALSE	KIRC	219395442	0.183788	0.164224	outcome	TRUE	reported	380248	378749	1499	2	220260164	0.0410178	9.64495043135076e-30	25995	NA	NA	eqtl-a-ENSG00000054356	TRUE	reported	eqtl-a-ENSG00000054356	rs140657989	9.64495043135076e-30	2	1	TRUE	0.0700850348132148	128.305556957604	PTPRN	ENSG00000054356
1002	eqtl-a-ENSG00000054356	rs142156009	T	C	T	C	0.220508	0.0427994	0.0185066	0.0151211	FALSE	FALSE	FALSE	KIRC	219139954	0.770859	0.14695	outcome	TRUE	reported	380248	378749	1499	2	220004676	0.0441218	5.80483660912742e-07	23717	NA	NA	eqtl-a-ENSG00000054356	TRUE	reported	eqtl-a-ENSG00000054356	rs142156009	5.80483660912742e-07	2	1	TRUE	0.0324362755080486	24.9771140615502	PTPRN	ENSG00000054356
1003	eqtl-a-ENSG00000054356	rs146342895	T	C	T	C	0.266888	0.0599153	0.0144981	0.0056033	FALSE	FALSE	FALSE	KIRC	219471676	0.807965	0.246512	outcome	TRUE	reported	380248	378749	1499	2	220336398	0.0497414	8.07699845857488e-08	14628	NA	NA	eqtl-a-ENSG00000054356	TRUE	reported	eqtl-a-ENSG00000054356	rs146342895	8.07699845857488e-08	2	1	TRUE	0.0443221952016167	28.7887020659662	PTPRN	ENSG00000054356
1004	eqtl-a-ENSG00000054356	rs148519990	T	C	T	C	0.455294	0.23141	0.0248506	0.0122845	FALSE	FALSE	FALSE	KIRC	219375635	0.16015	0.164755	outcome	TRUE	reported	380248	378749	1499	2	220240357	0.0380407	5.20235518687305e-33	26322	NA	NA	eqtl-a-ENSG00000054356	TRUE	reported	eqtl-a-ENSG00000054356	rs148519990	5.20235518687305e-33	2	1	TRUE	0.0735735748474618	143.247435029103	PTPRN	ENSG00000054356
1005	eqtl-a-ENSG00000054356	rs151141971	A	G	A	G	0.2777	0.0346663	0.0284659	0.0308536	FALSE	FALSE	FALSE	KIRC	219094344	0.744298	0.106284	outcome	TRUE	reported	380248	378749	1499	2	219959066	0.0357129	7.49721559687471e-15	24291	NA	NA	eqtl-a-ENSG00000054356	TRUE	reported	eqtl-a-ENSG00000054356	rs151141971	7.49721559687471e-15	2	1	TRUE	0.049831740177745	60.4646473256066	PTPRN	ENSG00000054356
1006	eqtl-a-ENSG00000054356	rs151183191	C	A	C	A	-0.216364	0.155196	0.0281333	0.0123221	FALSE	FALSE	FALSE	KIRC	219172886	0.353553	0.167287	outcome	TRUE	reported	380248	378749	1499	2	220037608	0.035948	1.75711424659509e-09	29139	NA	NA	eqtl-a-ENSG00000054356	TRUE	reported	eqtl-a-ENSG00000054356	rs151183191	1.75711424659509e-09	2	1	TRUE	-0.0352386	36.2260129114209	PTPRN	ENSG00000054356
1007	eqtl-a-ENSG00000054356	rs16971217	G	C	G	C	0.115079	0.0785318	0.177288	0.172189	FALSE	TRUE	FALSE	KIRC	35617036	0.106682	0.0486782	outcome	TRUE	reported	380248	378749	1499	17	33944055	0.0155539	1.37625845480249e-13	31185	NA	NA	eqtl-a-ENSG00000054356	TRUE	reported	eqtl-a-ENSG00000054356	rs16971217	1.37625845480249e-13	2	1	TRUE	0.04186171014974	54.7411042476964	PTPRN	ENSG00000054356
1008	eqtl-a-ENSG00000054356	rs183321504	A	G	A	G	0.319296	-0.37507	0.0164376	0.00267424	FALSE	FALSE	FALSE	KIRC	219398592	0.283484	0.349708	outcome	TRUE	reported	380248	378749	1499	2	220263314	0.0467313	8.33873168908594e-12	20497	NA	NA	eqtl-a-ENSG00000054356	TRUE	reported	eqtl-a-ENSG00000054356	rs183321504	8.33873168908594e-12	2	1	TRUE	0.0476724629223046	46.6843407711169	PTPRN	ENSG00000054356
1009	eqtl-a-ENSG00000054356	rs185776218	A	G	A	G	-0.194474	0.255143	0.0306357	0.0108464	FALSE	FALSE	FALSE	KIRC	219156009	0.154114	0.179029	outcome	TRUE	reported	380248	378749	1499	2	220020731	0.0344984	1.72639432607639e-08	27712	NA	NA	eqtl-a-ENSG00000054356	TRUE	reported	eqtl-a-ENSG00000054356	rs185776218	1.72639432607639e-08	2	1	TRUE	-0.0338451	31.7778994956966	PTPRN	ENSG00000054356
1010	eqtl-a-ENSG00000054356	rs191627066	T	C	T	C	-0.238459	0.00294522	0.0297088	0.0140572	FALSE	FALSE	FALSE	KIRC	219202427	0.985263	0.159452	outcome	TRUE	reported	380248	378749	1499	2	220067149	0.0349976	9.51919010332286e-12	27055	NA	NA	eqtl-a-ENSG00000054356	TRUE	reported	eqtl-a-ENSG00000054356	rs191627066	9.51919010332286e-12	2	1	TRUE	-0.04139	46.4248928943664	PTPRN	ENSG00000054356
1011	eqtl-a-ENSG00000054356	rs2276638	T	C	T	C	0.484302	0.0361663	0.154765	0.0898698	FALSE	FALSE	FALSE	KIRC	219280564	0.568854	0.0634788	outcome	TRUE	reported	380248	378749	1499	2	220145286	0.0159429	1e-200	31683	NA	NA	eqtl-a-ENSG00000054356	TRUE	reported	eqtl-a-ENSG00000054356	rs2276638	1e-200	2	1	TRUE	0.168234463539013	922.779379087316	PTPRN	ENSG00000054356
1012	eqtl-a-ENSG00000054356	rs2293078	G	C	G	C	0.405661	0.0802713	0.0917995	0.0501081	FALSE	TRUE	FALSE	KIRC	219235961	0.333436	0.0829921	outcome	TRUE	reported	380248	378749	1499	2	220100683	0.0203279	1.33475021658095e-88	28915	NA	NA	eqtl-a-ENSG00000054356	TRUE	reported	eqtl-a-ENSG00000054356	rs2293078	1.33475021658095e-88	2	1	TRUE	0.116561108420287	398.237	PTPRN	ENSG00000054356
1013	eqtl-a-ENSG00000054356	rs2891733	T	C	T	C	-0.417645	-0.0805795	0.903886	0.948366	FALSE	FALSE	FALSE	KIRC	219270486	0.319292	0.0809102	outcome	TRUE	reported	380248	378749	1499	2	220135208	0.0198843	6.07994989139986e-98	31684	NA	NA	eqtl-a-ENSG00000054356	TRUE	reported	eqtl-a-ENSG00000054356	rs2891733	6.07994989139986e-98	2	1	TRUE	-0.117189	441.157796886384	PTPRN	ENSG00000054356
1014	eqtl-a-ENSG00000054356	rs4326844	G	A	G	A	0.0613113	-0.0141439	0.593314	0.679282	FALSE	FALSE	FALSE	KIRC	54342686	0.720727	0.0395647	outcome	TRUE	reported	380248	378749	1499	12	54736470	0.0121054	4.08404012212906e-07	31684	NA	NA	eqtl-a-ENSG00000054356	TRUE	reported	eqtl-a-ENSG00000054356	rs4326844	4.08404012212906e-07	2	1	TRUE	0.0284432578314879	25.6520903251919	PTPRN	ENSG00000054356
1015	eqtl-a-ENSG00000054356	rs4674396	T	A	T	A	-0.101297	-0.0603088	0.609783	0.616498	FALSE	TRUE	FALSE	KIRC	219433533	0.11299	0.0380522	outcome	TRUE	reported	380248	378749	1499	2	220298255	0.0121714	8.61985578705761e-17	30293	NA	NA	eqtl-a-ENSG00000054356	TRUE	reported	eqtl-a-ENSG00000054356	rs4674396	8.61985578705761e-17	2	1	TRUE	-0.0477643	69.2647221643579	PTPRN	ENSG00000054356
1016	eqtl-a-ENSG00000054356	rs6711142	T	C	T	C	-0.400378	-0.135506	0.91267	0.963558	FALSE	FALSE	FALSE	KIRC	219361671	0.154596	0.0951933	outcome	TRUE	reported	380248	378749	1499	2	220226393	0.0208106	1.74542020879138e-82	31681	NA	NA	eqtl-a-ENSG00000054356	TRUE	reported	eqtl-a-ENSG00000054356	rs6711142	1.74542020879138e-82	2	1	TRUE	-0.107468	370.144421252259	PTPRN	ENSG00000054356
1017	eqtl-a-ENSG00000054356	rs6725931	T	C	T	C	-0.468352	-0.0884813	0.868639	0.947632	FALSE	FALSE	FALSE	KIRC	219340424	0.270646	0.0803224	outcome	TRUE	reported	380248	378749	1499	2	220205146	0.0171727	8.87156012037976e-164	31681	NA	NA	eqtl-a-ENSG00000054356	TRUE	reported	eqtl-a-ENSG00000054356	rs6725931	8.87156012037976e-164	2	1	TRUE	-0.151464	743.819555718936	PTPRN	ENSG00000054356
1018	eqtl-a-ENSG00000054356	rs72963569	C	T	C	T	0.328972	0.210577	0.0237029	0.0108106	FALSE	FALSE	FALSE	KIRC	219402836	0.224598	0.173401	outcome	TRUE	reported	380248	378749	1499	2	220267558	0.0390268	3.47456147497044e-17	24946	NA	NA	eqtl-a-ENSG00000054356	TRUE	reported	eqtl-a-ENSG00000054356	rs72963569	3.47456147497044e-17	2	1	TRUE	0.053296079734595	71.0545649488496	PTPRN	ENSG00000054356
1019	eqtl-a-ENSG00000054356	rs72963600	T	C	T	C	0.309621	0.241211	0.0234598	0.0108264	FALSE	FALSE	FALSE	KIRC	219421972	0.164375	0.17347	outcome	TRUE	reported	380248	378749	1499	2	220286694	0.0392357	2.99295371033235e-15	25024	NA	NA	eqtl-a-ENSG00000054356	TRUE	reported	eqtl-a-ENSG00000054356	rs72963600	2.99295371033235e-15	2	1	TRUE	0.0498251077563762	62.2727446477184	PTPRN	ENSG00000054356
1020	eqtl-a-ENSG00000054356	rs74584209	T	C	T	C	0.275664	0.1876	0.0189608	0.0105478	FALSE	FALSE	FALSE	KIRC	219167078	0.284392	0.175244	outcome	TRUE	reported	380248	378749	1499	2	220031800	0.043577	2.51918464202141e-10	17258	NA	NA	eqtl-a-ENSG00000054356	TRUE	reported	eqtl-a-ENSG00000054356	rs74584209	2.51918464202141e-10	2	1	TRUE	0.0481005090252473	40.0170850479411	PTPRN	ENSG00000054356
1021	eqtl-a-ENSG00000054356	rs77242849	C	G	C	G	0.548754	0.0341421	0.12078	0.0662327	FALSE	TRUE	FALSE	KIRC	219294566	0.640436	0.0730955	outcome	TRUE	reported	380248	378749	1499	2	220159288	0.0176704	1e-200	31230	NA	NA	eqtl-a-ENSG00000054356	TRUE	reported	eqtl-a-ENSG00000054356	rs77242849	1e-200	2	1	TRUE	0.173083057849295	964.412068942649	PTPRN	ENSG00000054356
1022	eqtl-a-ENSG00000054356	rs80322301	A	C	A	C	0.571185	0.0794552	0.106155	0.0451954	FALSE	FALSE	FALSE	KIRC	219308779	0.355334	0.0859633	outcome	TRUE	reported	380248	378749	1499	2	220173501	0.0187139	1e-200	31588	NA	NA	eqtl-a-ENSG00000054356	TRUE	reported	eqtl-a-ENSG00000054356	rs80322301	1e-200	2	1	TRUE	0.169259600552119	931.590344807624	PTPRN	ENSG00000054356
1023	eqtl-a-ENSG00000054356	rs9646859	G	A	G	A	-0.115081	-0.0476864	0.565724	0.622428	FALSE	FALSE	FALSE	KIRC	219351127	0.2089	0.0379489	outcome	TRUE	reported	380248	378749	1499	2	220215849	0.0119686	6.89763167718604e-22	28917	NA	NA	eqtl-a-ENSG00000054356	TRUE	reported	eqtl-a-ENSG00000054356	rs9646859	6.89763167718604e-22	2	1	TRUE	-0.0564554	92.4529021751093	PTPRN	ENSG00000054356
1024	eqtl-a-ENSG00000054356	rs9915021	T	C	T	C	0.127556	0.0526513	0.0591544	0.0485455	FALSE	FALSE	FALSE	KIRC	35649600	0.540917	0.0861122	outcome	TRUE	reported	380248	378749	1499	17	33976619	0.0252057	4.18379117963606e-07	31569	NA	NA	eqtl-a-ENSG00000054356	TRUE	reported	eqtl-a-ENSG00000054356	rs9915021	4.18379117963606e-07	2	1	TRUE	0.0284714363866331	25.6096862453967	PTPRN	ENSG00000054356
1025	eqtl-a-ENSG00000054967	rs10501411	C	A	C	A	0.642864	0.0150444	0.106722	0.110798	FALSE	FALSE	FALSE	KIRC	73581040	0.79693	0.0584652	outcome	TRUE	reported	380248	378749	1499	11	73292085	0.0185013	1e-200	31569	NA	NA	eqtl-a-ENSG00000054967	TRUE	reported	eqtl-a-ENSG00000054967	rs10501411	1e-200	2	1	TRUE	0.191933068863204	1207.35148823664	RELT	ENSG00000054967
1026	eqtl-a-ENSG00000054967	rs111410716	A	G	A	G	0.444838	0.0776556	0.0239488	0.0349902	FALSE	FALSE	FALSE	KIRC	74181891	0.431768	0.098777	outcome	TRUE	reported	380248	378749	1499	11	73892936	0.0387479	1.65882281537504e-30	25765	NA	NA	eqtl-a-ENSG00000054967	TRUE	reported	eqtl-a-ENSG00000054967	rs111410716	1.65882281537504e-30	2	1	TRUE	0.0713423562833001	131.797574671751	RELT	ENSG00000054967
1027	eqtl-a-ENSG00000054967	rs111505943	C	T	C	T	0.328029	0.0897509	0.0656175	0.0728206	FALSE	FALSE	FALSE	KIRC	74018724	0.199959	0.0700265	outcome	TRUE	reported	380248	378749	1499	11	73729769	0.0238775	6.01173737483283e-43	29253	NA	NA	eqtl-a-ENSG00000054967	TRUE	reported	eqtl-a-ENSG00000054967	rs111505943	6.01173737483283e-43	2	1	TRUE	0.0800675346209663	188.732534682876	RELT	ENSG00000054967
1028	eqtl-a-ENSG00000054967	rs112314909	A	G	A	G	0.304422	-0.124433	0.0142914	0.00249442	FALSE	FALSE	FALSE	KIRC	73997327	0.737658	0.371488	outcome	TRUE	reported	380248	378749	1499	11	73708372	0.0500801	1.21241136851889e-09	5038	NA	NA	eqtl-a-ENSG00000054967	TRUE	reported	eqtl-a-ENSG00000054967	rs112314909	1.21241136851889e-09	2	1	TRUE	0.0853454809500835	36.950617026436	RELT	ENSG00000054967
1029	eqtl-a-ENSG00000054967	rs11235692	T	C	T	C	0.223573	0.0528779	0.127483	0.122693	FALSE	FALSE	FALSE	KIRC	73247766	0.351686	0.0567771	outcome	TRUE	reported	380248	378749	1499	11	72958811	0.0177461	2.16023003477474e-36	28588	NA	NA	eqtl-a-ENSG00000054967	TRUE	reported	eqtl-a-ENSG00000054967	rs11235692	2.16023003477474e-36	2	1	TRUE	0.0743083101903007	158.720440420038	RELT	ENSG00000054967
1030	eqtl-a-ENSG00000054967	rs11235743	G	A	G	A	0.521726	0.0826254	0.229486	0.296585	FALSE	FALSE	FALSE	KIRC	73413781	0.0404055	0.0403134	outcome	TRUE	reported	380248	378749	1499	11	73124826	0.0134554	1e-200	31569	NA	NA	eqtl-a-ENSG00000054967	TRUE	reported	eqtl-a-ENSG00000054967	rs11235743	1e-200	2	1	TRUE	0.213218926544171	1503.45950281363	RELT	ENSG00000054967
1031	eqtl-a-ENSG00000054967	rs11235951	T	C	T	C	0.100491	0.0553367	0.133282	0.184002	FALSE	FALSE	FALSE	KIRC	73927813	0.244637	0.0475616	outcome	TRUE	reported	380248	378749	1499	11	73638858	0.0174909	9.18121166931533e-09	31684	NA	NA	eqtl-a-ENSG00000054967	TRUE	reported	eqtl-a-ENSG00000054967	rs11235951	9.18121166931533e-09	2	1	TRUE	0.0322613541658086	33.0088217380017	RELT	ENSG00000054967
[truncated: 12,156 more rows]
